# Supplementary material for: Identification of Transcriptional Networks Involved in De Novo Organ Formation in Tomato Hypocotyl Explants
Source: Int J Mol Sci. 2022 Dec 17;23(24):16112. doi: 10.3390/ijms232416112 (PMC9788163; doi:10.3390/ijms232416112)
Supplement: Supplementary file 1 [file ijms-23-16112-s001.zip › SupplTables_Larriba_TF_REVIEWED-V2.xlsx]

## Sheet: TableS1
Table S1. Annotation and expression values of putative TF genes identified in tomato during de novo organ formation
							apical					basal
Gene id	ITAG4 annotation	Family	Gene name	Reference	Arabidopsis thaliana gene ID	Arabidopsis thaliana gene name	0 hae	24 hae	96 hae	192 hae		0 hae	24 hae	96 hae	192 hae
Solyc01g014180	Zinc finger A20 and AN1 domain-containing stress-associated protein 8	A20-like	A20-L1		AT1G51200		380.542	152.993	134.44	165.93		131.528	115.169	118.49	176.332
Solyc01g086960	Zinc finger A20 and AN1 domain stress-associated protein	A20-like	A20-L2		AT3G12630	SAP5	273.389	235.369	116.649	163.686		756.275	165.779	115.357	144.056
Solyc01g086970	Zinc finger A20 and AN1 domain-containing stress-associated protein 8	A20-like	A20-L3				143.892	100.946	70.037	95.8555		115.477	116.992	89.3613	124.779
Solyc02g087210	Zinc finger AN1 domain-containing stress-associated protein 12	A20-like	A20-L4		AT3G28210	SAP12-PMZ
Solyc07g055090	Zinc finger A20 and AN1 domain stress-associated protein	A20-like	A20-L5		AT4G14225/AT4G25380	AtSAP10-SAP10
Solyc08g079700	Zinc finger A20 and AN1 domain stress-associated protein	A20-like	A20-L6		AT1G12440/AT4G12040	AtSAP7-SAP7	109.624	19.9575	48.053	72.572		209.205	39.5597	106.353	114.394
Solyc09g009590	Zinc finger A20 and AN1 domain stress-associated protein	A20-like	A20-L7				23.9245	21.968	6.0155	6.3005		18.469	11.8257	10.6037	12.8003
Solyc10g079080	Zinc finger A20 and AN1 domain-containing stress-associated protein 8	A20-like	A20-L8				75.389	75.1085	65.511	62.8195		55.4893	91.187	72.605	75.4233
Solyc10g083460	Zinc finger A20 and AN1 domain-containing stress-associated protein	A20-like	A20-L9		AT2G36320		10.8465	40.9755	18.6155	26.257		21.2083	29.735	24.9123	29.8973
Solyc11g061770	Zinc finger A20 and AN1 domain stress-associated protein	A20-like	A20-L10		AT1G51200		57.671	50.327	33.245	36.459		34.0657	36.86	34.4453	35.689
Solyc12g100060	Zinc finger A20 and AN1 domain stress-associated protein	A20-like	A20-L11				571.145	108.657	114.566	194.786		129.182	81.7203	96.957	150.262
Solyc01g102750	PHD finger protein ALFIN-LIKE 6	Alfin-like	Alfin-L1a		AT1G14510/AT2G02470	AL7-AtAL7/AL6	49.8735	49.4585	55.9515	64.824		32.1573	43.1457	42.3463	45.178
Solyc01g102760	PHD finger protein ALFIN-LIKE 8	Alfin-like	Alfin-L1b		AT2G02470	AL6	71.945	53.851	39.1125	50.49		45.0303	50.7833	45.7177	49.9577
Solyc06g051420	nucleic acid-binding protein	Alfin-like	Alfin-L2				37.581	42.6685	31.507	39.446		34.3273	53.165	41.5913	42.014
Solyc06g062850	PHD finger protein ALFIN-LIKE 5	Alfin-like	Alfin-L3		AT3G42790	AL3	16.6725	21.205	17.787	21.886		17.3187	28.8897	25.1643	25.657
Solyc07g041190	PHD finger protein ALFIN-LIKE 5	Alfin-like	Alfin-L4a		AT5G20510/AT5G26210	AL5/AL4	23.5195	14.4995	16.837	20.437		10.194	9.161	13.7183	15.3173
Solyc09g005360	PHD finger protein ALFIN-LIKE 1	Alfin-like	Alfin-L1c		AT3G11200/AT5G05610	AL2/AL1	41.6835	36.249	26.841	30.9205		24.5277	35.146	34.9957	32.4147
Solyc10g076690	PHD finger protein ALFIN-LIKE 1	Alfin-like	Alfin-L1d		AT3G11200/AT5G05610	AL2/AL1	25.8065	24.6265	18.076	18.5665		20.2567	19.806	20.3697	21.8467
Solyc10g085180	PHD finger protein ALFIN-LIKE 1	Alfin-like	Alfin-L1e				12.51	14.796	9.6035	11.9325		10.7347	15.9243	11.5997	10.645
Solyc12g096040	PHD finger protein ALFIN-LIKE 4	Alfin-like	Alfin-L4b		AT5G20510/AT5G26210	AL5/AL4	14.3755	23.5265	17.3245	25.7055		25.0603	23.2493	30.5593	25.263
Solyc01g008890	Solanum lycopersicum Cytokinin Response Factor 3	AP2-EREBP	POS1				17.3555	21.466	16.6135	18.825		15.98	10.487	13.7497	17.542
Solyc01g096860	AP2-like ethylene-responsive transcription factor	AP2-EREBP	WRI1		AT3G54320	ATWRI1-WRI1-ASML1-WRI	0.0665	0.4385	0.0805	0.8155		0.573667	0.229	3.57967	5.06667
Solyc02g030210	AP2-like ethylene-responsive transcription factor	AP2-EREBP	AP2-EREBPL1		AT2G41710		19.953	15.3935	14.8665	17.5545		16.805	14.428	17.9423	19.081
Solyc02g064960	APETALA2b	AP2-EREBP	AP2a		AT4G36920	AP2-FL1-AtAP2-FLO2	37.8795	32.046	25.122	20.318		28.0063	26.5573	29.8233	33.2743
Solyc02g088310	Ethylene-responsive transcription factor	AP2-EREBP	ERN1L				0.836	0.718	0.131	0.3465		0.282333	0.348	0.264333	0.239
Solyc02g092050	AP2-like ethylene-responsive transcription factor PLT2	AP2-EREBP	ANT		AT4G37750	ANT-CKC1-DRG-CKC	9.9035	21.6165	32.783	40.4415		27.0497	13.6407	29.9107	23.5707
Solyc02g093150	APETALA2c	AP2-EREBP	AP2b		AT4G36920	AP2-FL1-AtAP2-FLO2	18.8485	21.7985	20.812	15.8675		9.78533	22.4477	14.8873	15.0667
Solyc03g044300	APETALA2a	AP2-EREBP	AP2c		AT4G36920	AP2-FL1-AtAP2-FLO2	0.656	0.267	0.5105	0.34		1.39633	2.99967	5.63367	6.554
Solyc03g117720	AP2-like ethylene-responsive transcription factor	AP2-EREBP	WRI3		AT1G16060	ADAP-WRI3	1.47	2.2295	1.157	2.6925		2.89067	2.99767	3.21567	4.649
Solyc03g123430	LTM interacting AP2	AP2-EREBP	AIL1L				0.0045	2.565	1.486	3.0975		0.294333	1.05633	0.812	0.152
Solyc04g009450	Ethylene-responsive transcription factor	AP2-EREBP	AP2-EREBPL2				1.6465	2.4065	1.1445	2.014		1.26167	1.85767	1.62067	1.51133
Solyc04g049800	AP2-like ethylene-responsive transcription factor	AP2-EREBP	RAP2-7La				35.7945	77.439	26.6215	32.3765		41.2837	32.509	28.3863	28.3733
Solyc04g077490	AP2-like ethylene-responsive transcription factor ANT	AP2-EREBP	ANT		AT4G37750	ANT-CKC1-DRG-CKC	47.843	58.4835	46.885	70.0095		70.748	61.1967	84.6877	74.58
Solyc05g051380	AP2-like ethylene-responsive transcription factor AIL6	AP2-EREBP	AIL7		AT5G65510	PLT7	0.0095	5.7655	4.5225	10.7925		4.116	14.7997	16.192	24.7443
Solyc06g066390	AP2-like ethylene-responsive transcription factor BBM2	AP2-EREBP	BBM2La
Solyc06g068570	AP2-like ethylene-responsive transcription factor	AP2-EREBP	ADAPLa				87.512	40.84	16.3695	19.5945		11.174	3.79	1.04933	10.3273
Solyc06g075510	APETALA2e	AP2-EREBP	RAP2.7		AT2G28550	TOE1-RAP2.7	24.058	187.144	142.19	51.867		118.981	85.674	61.374	33.5287
Solyc07g018290	AP2-like ethylene-responsive transcription factor	AP2-EREBP	PLT5		AT5G57390	CHO1-PLT5-EMK-AIL5	41.6715	15.9005	5.2455	5.147		29.7943	16.0267	17.6033	25.6063
Solyc08g076380	AP2-like ethylene-responsive transcription factor BBM2	AP2-EREBP	BBM2Lb
Solyc08g081650	Ethylene-responsive transcription factor	AP2-EREBP	AP2-EREBPL3				3.761	3.484	4.5715	4.9465		2.51633	2.39567	3.461	4.161
Solyc08g081670	Ethylene-responsive transcription factor	AP2-EREBP	AP2-EREBPL4				5.94	5.973	7.395	6.0855		4.00033	4.94	5.53667	7.872
Solyc09g007260	AP2-like ethylene-responsive transcription factor TOE3	AP2-EREBP	RAP2-7Lb				5.829	6.1105	8.8205	6.2735		7.77167	10.2103	14.9973	11.7403
Solyc10g084340	AP2-like ethylene-responsive transcription factor	AP2-EREBP	RAP2-7Lc				3.501	4.4265	4.035	6.457		8.84667	3.02767	6.15733	4.24633
Solyc11g008560	AP2-like ethylene-responsive transcription factor BBM	AP2-EREBP	BBM		AT5G17430	PLT4-BBM	0	0	0.0175	0		1.431	2.24033	5.34933	5.619
Solyc11g010710	AP2-like ethylene-responsive transcription factor	AP2-EREBP	PLT3		AT5G10510	AIL6-PLT3	5.571	4.037	2.5495	9.278		10.3997	18.4613	25.6467	14.9987
Solyc11g061750	AP2-like ethylene-responsive transcription factor PLT1	AP2-EREBP	PLT2		AT1G51190	PLT2	0	0	0	0		1.436	1.007	6.183	3.61833
Solyc11g072600	APETALA2d	AP2-EREBP	RAP2-7Ld				39.8785	101.56	54.1305	52.4345		74.6403	74.2607	59.1383	55.9087
Solyc12g010490	AP2-like ethylene-responsive transcription factor	AP2-EREBP	ADAPLb
Solyc01g096070	Auxin Response Factor 18	ARF	ARF11/18		AT2G46530/AT3G61830	ARF11/ARF18	107.866	29.0895	21.5815	24.8925		67.435	68.9777	69.7013	114.187
Solyc01g103050	Auxin Response Factor 1	ARF	ARF1		AT1G59750	ARF1	186.282	124.722	142.434	156.194		288.041	113.951	158.057	211.748
Solyc02g037530	auxin response factor 8B	ARF	ARF8a		AT5G37020	ATARF8-ARF8	112.391	66.354	64.0035	57.169		51.6517	56.2457	43.1927	39.8443
Solyc02g077560	auxin response factor 3	ARF	ARF3		AT2G33860	ARF3-ETT	125.944	75.393	93.7745	103.564		59.224	53.909	74.578	116.654
Solyc03g031970	Auxin response factor	ARF	ARF8b		AT5G37020	ATARF8-ARF8	110.192	160.741	146.637	105.967		102.712	64.0567	71.2	79.2773
Solyc03g118290	auxin response factor 2A	ARF	ARF2a		AT5G62000	AtARF2-ARF2-ARF1-BP-ORE14	171.335	72.0095	127.302	130.445		156.672	70.437	105.803	170.257
Solyc04g081240	Auxin Response Factor 5	ARF	ARF5		AT1G19850	IAA24-MP-ARF5-	19.423	15.883	14.887	45.252		14.6413	35.4907	53.8773	77.1333
Solyc05g047460	Auxin Response Factor 7B	ARF	ARF19La				253.267	118.808	113.56	85.949		117.274	98.3873	113.64	148.964
Solyc05g056040	Auxin Response Factor 24	ARF	ARF17La				55.3565	42.504	67.822	56.828		85.2893	49.189	48.1527	74.0077
Solyc06g075150	Auxin Response Factor 10B	ARF	ARF10L				9.0525	2.3985	3.7135	3.7965		2.738	6.71	7.74867	6.70767
Solyc07g016180	Auxin Response Factor 7A	ARF	ARF19Lb				107.776	48.8305	80.6305	65.9965		79.3437	46.5757	57.623	67.2947
Solyc07g042260	Auxin Response Factor 7	ARF	ARF11/7		AT1G19220/AT5G20730	IAA22-ARF19-ARF11/NPH4-MSG1-IAA21-IAA23	26.86	21.008	34.383	40.5245		44.0987	19.8623	19.831	18.559
Solyc07g043620	Auxin Response Factor 6B	ARF	ARF6L				17.889	9.51	18.647	10.7055		14.956	13.5923	15.6847	16.9237
Solyc08g008380	Auxin Response Factor 9B	ARF	ARF9a		AT4G23980	ARF9	13.687	7.1975	10.5335	14.3375		28.3773	39.27	63.7	94.7477
Solyc08g082630	Auxin Response Factor 9A	ARF	ARF9b		AT4G23980	ARF9	5.445	0.5055	0.2665	1.17		5.356	0.661	2.802	2.13467
Solyc09g007810	Auxin Response Factor 16A	ARF	ARF16		AT2G28350/AT4G30080	ARF10/ARF16	21.099	13.213	11.7075	8.121		16.256	14.9257	25.9943	21.777
Solyc10g086130	Auxin Response Factor 16B	ARF	ARF18L
Solyc11g013480	Auxin Response Factor 17	ARF	ARF17Lb				0.807	0.939	1.5945	1.5585		2.15267	1.362	1.92867	1.81867
Solyc11g069190	auxin response factor 4	ARF	ARF4		AT5G60450	ARF4	120.757	72.694	49.442	74.767		149.553	90.3737	150.007	126.25
Solyc11g069500	Auxin Response Factor 10A	ARF	ARF10		AT2G28350	ARF10	21.566	23.3485	29.8055	35.663		9.27833	19.0023	33.0483	35.76
Solyc12g006340	Auxin Response Factor 6	ARF	ARF6				7.87	17.1415	28.042	17.632		25.219	16.3107	12.8793	14.1297
Solyc12g042070	Auxin Response Factor 2B	ARF	ARF2b		AT5G62000	AtARF2-ARF2-ARF1-BP-ORE14	125.704	59.3125	69.3675	76.2745		99.6493	52.6807	82.604	124.615
Solyc01g065540	Two-component response regulator	ARR-B	ARR-B1		AT3G16857/AT4G16110	RR1/RR2	39.473	18.7615	22.6795	22.764		17.1757	21.45	26.276	32.0903
Solyc03g026250	Two-component response regulator	ARR-B	ARR-B10
Solyc04g008050	Two-component response regulator	ARR-B	ARR-B7				34.634	41.4	43.8125	47.2505		57.2607	38.0537	40.059	39.3263
Solyc05g014260	Two-component response regulator	ARR-B	ARR-B5		AT1G67710	ARR11	196.76	14.667	26.5095	34.348		82.5233	41.154	43.6127	76.1637
Solyc05g054390	Two-component response regulator	ARR-B	ARR-B2		AT3G16857/AT4G16110	RR1-ARR1/ARR2-RR2	89.6475	97.4375	102.094	85.739		72.8153	105.793	84.035	94.476
Solyc06g061030	Two-component response regulator APRR2-like protein	ARR-B	ARR-B12		AT4G18020	PRR2-APRR2	82.6135	208.103	94.4115	88.662		97.2243	107.306	82.7373	82.3027
Solyc07g005140	Two-component response regulator	ARR-B	ARR-B4		AT2G25180	ARR12-AtARR12-RR12-	26.9585	50.166	43.95	35.026		34.4503	40.7043	61.143	61.9443
Solyc07g009110	Two-component response regulator	ARR-B	ARR-B14L		AT1G68210	APRR6-PRR6
Solyc07g009580	Two-component response regulator	ARR-B	ARR-B9
Solyc07g019550	Two-component response regulator	ARR-B	ARR-B8
Solyc08g077230	Two-component response regulator APRR2-like protein	ARR-B	ARR-B11		AT4G18020	PRR2-APRR2	94.6555	124.272	46.909	32.1235		74.5793	100.772	78.597	61.0837
Solyc11g072330	Two-component response regulator	ARR-B	ARR-B13L				12.924	6.435	7.486	6.602		5.69533	8.71367	8.41933	8.99467
Solyc12g010330	Two-component response regulator	ARR-B	ARR-B3		AT2G25180/AT5G58080	ARR12-AtARR12-RR12/ARR18-RR18	39.4465	38.2315	38.068	34.4		26.6433	29.7247	35.6377	38.4933
Solyc12g099380	Two-component response regulator	ARR-B	ARR-B6
Solyc00g011660	B3 domain-containing protein	B3	B3-1
Solyc00g500093	B3 domain-containing protein	B3	B3-2
Solyc00g500219	B3 domain-containing protein	B3	B3-3
Solyc00g500221	B3 domain-containing protein	B3	B3-4
Solyc00g500222	Transcriptional factor B3 family protein	B3	B3-5
Solyc01g015210	B3 domain-containing protein	B3	B3-6
Solyc01g079560	B3 domain-containing protein	B3	B3-7
Solyc01g081400	B3 domain-containing protein	B3	B3-8				5.47	4.732	5.0225	6.581		4.01033	3.77033	5.63633	6.15267
Solyc01g095880	B3 domain-containing protein	B3	B3-9
Solyc01g096790	B3 domain-containing protein	B3	B3-10				0.861	1.823	0.887	1.235		1.518	3.28767	2.052	3.04567
Solyc01g106250	B3 domain-containing protein	B3	B3-11		AT5G60130/AT5G60140	REM11-VAL	0.915	0.507	0.4355	0.6395		0.985333	1.21633	0.949333	2.11267
Solyc01g108120	B3 domain-containing protein	B3	B3-12				9.861	11.744	9.1325	11.078		8.93767	8.59767	6.25933	11.0383
Solyc01g108130	B3 domain-containing protein	B3	B3-13				12.9875	8.34	8.4055	7.1325		11.9357	9.26867	7.846	10.1247
Solyc01g108140	B3 domain-containing protein	B3	B3-14		AT3G19184	REM1	10.649	7.165	7.7585	10.9265		8.18133	8.318	13.271	11.9987
Solyc01g108930	B3 domain-containing protein	B3	B3-15		AT5G18090		0.486	0.075	0.3435	1.041		0.303667	0.252667	1.025	0.719667
Solyc01g108940	B3 domain-containing protein	B3	B3-16		AT3G53310/AT5G66980	REM16	0.0895	0.515	0.662	1.9545		0.203667	1.043	3.04067	1.98867
Solyc01g108950	B3 domain-containing protein	B3	B3-17
Solyc01g150140	B3 domain-containing protein	B3	B3-18
Solyc02g021260	B3 domain-containing protein	B3	B3-19				6.623	2.771	14.7765	17.678		1.09067	2.146	7.27433	5.059
Solyc02g026080	B3 domain-containing protein	B3	B3-20
Solyc02g065310	B3 domain-containing protein	B3	B3-21
Solyc02g065340	High mobility group B protein 3	B3	B3-22
Solyc02g065350	B3 domain-containing protein	B3	B3-23				19.684	15.339	10.281	13.023		10.4927	11.4613	16.6743	15.962
Solyc02g079020	B3 domain-containing transcription repressor VAL1	B3	B3-24				23.281	16.399	18.7585	22.254		22.875	16.7243	19.5207	30.45
Solyc02g081780	High mobility group B protein 2	B3	B3-25
Solyc02g090170	B3 domain-containing protein	B3	B3-26		AT4G33280		0.4235	0.1975	0.0905	0.141		4.21533	1.573	2.50233	3.88733
Solyc02g090710	B3 domain-containing protein	B3	B3-27				36.334	27.605	32.1235	34.183		32.2283	33.7427	36.673	37.7783
Solyc02g094460	B3 domain transcription factor	B3	B3-28		AT3G26790	FUS3
Solyc03g007140	B3 domain-containing protein	B3	B3-29				14.368	10.0105	9.5125	12.304		11.1203	10.5057	11.968	15.9877
Solyc03g036477	B3 domain-containing protein	B3	B3-30
Solyc03g042500	B3 domain-containing protein	B3	B3-31
Solyc03g043580	B3 domain-containing protein	B3	B3-32
Solyc03g111410	B3 domain-containing protein	B3	B3-33				22.3845	16.7525	15.129	15.4345		13.9553	16.3783	15.4707	21.084
Solyc03g111500	B3 domain-containing protein	B3	B3-34				5.9695	3.1335	2.989	4.7295		5.53233	5.014	3.506	5.264
Solyc04g015500	B3 domain-containing protein	B3	B3-35				19.36	10.3585	7.2805	12.0085		8.94633	8.31433	9.024	11.939
Solyc04g064830	Transcriptional factor B3 family protein	B3	B3-36				9.482	5.717	7.764	7.6935		4.64733	6.72	7.83	9.741
Solyc04g079130	B3 domain-containing protein	B3	B3-37		AT5G42700		3.199	3.28	3.284	16.21		11.4337	5.651	24.6243	15.36
Solyc04g079590	B3 domain-containing protein	B3	B3-38				30.5215	16.4225	24.692	23.036		19.7853	25.3823	28.891	29.6447
Solyc05g004000	B3 domain-containing protein	B3	B3-39		AT2G46870	NGA1	0.019	0.056	0.05	0.124		1.41533	0.485667	1.12333	1.28833
Solyc05g017740	High mobility group B protein 2	B3	B3-40
Solyc05g041100	B3 domain-containing protein	B3	B3-41		AT3G06220/AT5G60142	REM19
Solyc06g007530	B3 domain-containing protein	B3	B3-42		AT5G58280		2.066	3.672	2.581	5.6475		4.36767	3.348	7.767	5.27633
Solyc06g034140	B3 domain-containing protein	B3	B3-43				0.708	0.489	0.1895	1.107		0.288	0.599	0.507667	0.424667
Solyc06g073980	B3 domain-containing protein	B3	B3-44				5.062	4.405	2.761	4.4585		3.98833	2.42033	3.823	3.20267
Solyc06g074160	B3 domain-containing protein	B3	B3-45		AT1G16640/AT3G06160	REM18
Solyc06g082520	B3 domain-containing protein	B3	B3-46		AT2G30470	VAL1-HSI2	15.5375	16.6735	25.936	26.1515		18.6553	31.4977	31.8367	38.811
Solyc06g083590	ABI3	B3	B3-47		AT3G24650	ABI3-AtABI3-SIS10-
Solyc06g083600	B3 domain-containing transcription factor FUS3	B3	B3-48		AT3G24650	ABI3-AtABI3-SIS10-
Solyc07g017470	B3 domain-containing protein	B3	B3-49
Solyc07g054630	B3 domain-containing protein	B3	B3-50		AT3G18990	REM39-VRN1	5.591	2.275	2.0075	2.619		0.950333	2.58833	2.72133	2.88
Solyc08g006190	Transcriptional factor B3 family protein	B3	B3-51		AT1G26680
Solyc08g006200	Transcriptional factor B3 family protein	B3	B3-52
Solyc08g006210	Transcriptional factor B3 family protein	B3	B3-53		AT2G24645/AT2G24700/AT4G00260	REM32/MEE45
Solyc08g006220	Transcriptional factor B3 family protein	B3	B3-54				4.498	4.82	3.468	3.26		6.28133	4.68933	5.334	6.15533
Solyc08g006230	Transcriptional factor B3 family protein	B3	B3-55		AT4G31690		8.4865	8.044	3.627	3.637		5.21267	6.00267	4.87233	7.07833
Solyc08g006240	Transcriptional factor B3 family protein	B3	B3-56				2.76	0.8365	0.4855	1.912		1.51533	0.495	1.09133	0.931333
Solyc08g006270	Transcriptional factor B3 family protein	B3	B3-57				7.7485	8.26	6.2495	5.6905		6.29133	5.739	7.27433	6.93133
Solyc08g006280	Transcriptional factor B3 family protein	B3	B3-58
Solyc08g006483	Transcriptional factor B3 family protein	B3	B3-59
Solyc08g013690	B3 domain-containing protein	B3	B3-60		AT1G01030	NGA3
Solyc08g013700	B3 domain-containing protein	B3	B3-61		AT1G01030	NGA3
Solyc08g029090	B3 domain-containing protein	B3	B3-62				24.717	29.135	21.0755	44.403		14.287	5.77367	7.62467	10.674
Solyc08g068540	B3 domain-containing protein	B3	B3-63				1.9995	2.0375	0.9675	0.9385		1.07767	1.19367	0.966333	1.57833
Solyc09g010230	B3 domain-containing protein	B3	B3-64		AT2G36080/AT3G11580/AT5G06250	NGAL1-ABS2/SOD7-NGAL2/NGAL3-DPA4	3.4385	20.0885	14.9975	18.277		4.47933	5.721	3.47367	4.67167
Solyc10g049815	B3 domain-containing protein	B3	B3-65
Solyc10g053890	B3 domain-containing protein	B3	B3-66
Solyc10g075030	B3 domain-containing protein	B3	B3-67		AT4G32010	HSI2-L1-HSL1-VAL2-	35.6085	44.774	33.9505	43.556		42.5393	41.18	41.5317	76.5117
Solyc10g083210	B3 domain-containing protein	B3	B3-68		AT2G36080	NGAL1-ABS2	4.8205	3.8205	6	12.1795		26.256	4.771	4.332	5.29467
Solyc11g045450	B3 domain-containing protein	B3	B3-69
Solyc12g007300	B3 domain plant protein	B3	B3-70		AT4G03170		1.99	2.8375	4.6495	5.788		0.868333	3.305	2.48733	2.687
Solyc12g098460	AP2 domain-containing protein/B3 domain-containing protein	B3	B3-71
Solyc12g150121	AP2 domain-containing protein/B3 domain-containing protein	B3	B3-72
Solyc01g110470	GAGA-binding transcriptional activator	BBR-BPC	BPC4/5		AT2G21240/AT4G38910	BPC4-BBR-ATBPC4/BPC5-BBR/BPC5-ATBPC5-	8.969	5.267	7.3625	8.687		5.00467	6.928	7.81967	10.5787
Solyc02g084230	GAGA-binding transcriptional activator	BBR-BPC	BPC				155.973	56.333	47.034	48.8135		44.233	26.2627	42.5313	59.842
Solyc04g008380	GAGA-binding transcriptional activator	BBR-BPC	BPC1/2		AT1G14685/AT2G01930	ATBPC2-BBR/BPC2-BPC2/ATBPC1-BBR-BPC1-	119.449	99.7345	76.8555	85.451		79.0797	79.6343	84.5063	91.35
Solyc04g081170	GAGA-binding transcriptional activator	BBR-BPC	BPC6		AT5G42520	BBR/BPC6-ATBPC6-BPC6-	58.7155	52.8655	43.537	48.2425		30.092	45.5687	35.8147	48.773
Solyc06g072370	GAGA-binding transcriptional activator	BBR-BPC	BPC2L				10.835	10.0775	6.025	7.584		7.597	6.84	9.68033	8.74667
Solyc08g076230	GAGA-binding transcriptional activator	BBR-BPC	BPC7		AT2G35550	BPC7-ATBPC7-BBR-	27.6225	3.624	3.799	6.6245		3.246	4.27633	5.27233	8.93
Solyc01g094580	Beta-amylase	BES1	BMY4		AT2G45880	BMY4-BAM7	46.6975	27.452	44.2855	40.2985		32.4843	38.7333	40.0337	42.409
Solyc02g063010	BES1/BZR1-like protein	BES1	BES1-1L				198.381	86.9895	96.9905	101.567		169.915	80.3127	78.3827	77.8447
Solyc02g071990	BES1/BZR1	BES1	BEH4a		AT1G78700	BEH4	28.941	28.4345	34.24	45.1535		52.5373	24.1857	24.861	26.526
Solyc03g005990	BES1/BZR1	BES1	BEH4b		AT1G78700	BEH4	30.406	21.6785	16.9395	15.323		36.0307	16.573	18.2537	16.685
Solyc04g079980	Protein BZR1-like protein 1	BES1	BZR1		AT1G75080	BZR1	61.064	25.3575	36.91	40.4945		64.7397	34.83	37.1383	36.2513
Solyc07g062260	BES1/BZR1	BES1	BZR4L				7.7845	12.464	19.4845	18.226		13.308	13.0443	21.3323	17.3843
Solyc08g005780	Beta-amylase	BES1	BMY2		AT5G45300	BAM8-BMY2	14.7945	17.658	28.6715	22.963		16.8127	15.6067	24.034	15.65
Solyc10g076390	BES1/BZR1-like protein 1	BES1	BZR2L
Solyc12g089040	mature anther-specific protein LAT61	BES1	BZR1/2		AT1G19350/AT1G75080	BES1-BZR2/BZR1	54.209	89.92	62.591	61.5355		160.676	50.6927	57.9623	47.7857
Solyc01g010130	bHLH transcription factor 001	bHLH	ybHLH002	[94]			26.82	10.558	28.032	24.51		10.3593	8.451	10.9057	12.7283
Solyc01g014910	transcription factor bHLH95-like	bHLH	ybHLH003	[94]
Solyc01g014960	transcription factor bHLH95-like	bHLH	bHLH153
Solyc01g020170	bHLH transcription factor 074	bHLH	ybHLH004	[94]
Solyc01g020180	transcription factor bHLH95-like	bHLH	bHLH154
Solyc01g057300	bHLH transcription factor 002	bHLH	ybHLH005	[94]	AT1G49770	ZOU
Solyc01g067340	bHLH transcription factor 075	bHLH	ybHLH006	[94]
Solyc01g079270	transcription factor UPBEAT1	bHLH	bHLH155
Solyc01g080050	Basic helix-loop-helix	bHLH	ybHLH007	[94]	AT3G06120	MUTE
Solyc01g081090	bHLH transcription factor 003	bHLH	ybHLH008	[94]
Solyc01g081100	bHLH transcription factor 004	bHLH	ybHLH009	[94]	AT2G31210/AT2G31220	bHLH091/bHLH010
Solyc01g086870	bHLH transcription factor 076	bHLH	ybHLH010	[94]			109.401	64.496	48.278	48.367		111.001	80.2003	68.4273	66.4113
Solyc01g090790	bHLH transcription factor	bHLH	ybHLH011	[94]	AT4G00050	PIF8-UNE10	2.617	20.2345	8.4095	6.884		18.915	16.9723	9.025	9.44
Solyc01g096050	Transcription factor bHLH13	bHLH	ybHLH012	[94]	AT1G01260	bHLH13-bHLH013-JAM2-	25.502	25.274	10.062	16.3615		87.1937	19.311	21.0243	20.075
Solyc01g096370	transcription factor MYC2	bHLH	ybHLH013	[94]	AT4G00870	bHLH014-bHLH14	3.496	7.496	18.0985	15.897		14.2857	7.47033	12.6867	6.445
Solyc01g098720	Basic helix-loop-helix	bHLH	ybHLH014	[94]			2.3865	0.6585	0.492	0.3455		0.477	7.16367	10.7643	7.136
Solyc01g102300	bHLH transcription factor 006	bHLH	ybHLH015	[94]	AT1G09530	PIF3-PAP3-POC1-	62.9295	17.9505	24.2515	24.0855		25.5277	39.2143	29.411	38.228
Solyc01g105690	transcription factor bHLH143-like	bHLH	bHLH156				98.8005	74.2155	41.3005	34.0155		46.5733	29.6353	34.037	42.0003
Solyc01g106460	bHLH transcription factor 007	bHLH	ybHLH016	[94]	AT4G37850		0.019	15.711	13.372	7.8745		0.623333	6.615	5.181	4.63967
Solyc01g107140	Transcription factor	bHLH	ybHLH017	[94]	AT2G14760		0	0	0	0.0145		0.00933333	0.0126667	0.641667	0.293667
Solyc01g107490	Basic helix-loop-helix	bHLH	bHLH157		AT3G19500		0.0455	0.0095	0	0.3475		0.332	0.332667	0.753333	0.327
Solyc01g107950	bHLH transcription factor 008	bHLH	ybHLH018	[94]	AT1G49770	ZOU-RGE1
Solyc01g107960	bHLH transcription factor 009	bHLH	ybHLH019	[94]	AT1G49770	ZOU-RGE1	0.678	0.0655	0.192	0.4175		0.545	0.009	0.071	0.156333
Solyc01g107970	bHLH transcription factor 077	bHLH	ybHLH020	[94]
Solyc01g109700	bHLH transcription factor 010	bHLH	ybHLH021	[94]	AT4G34530	CIB1	281.161	38.5075	21.573	41.4485		66.853	39.2527	28.8603	49.271
Solyc01g111130	bHLH transcription factor 011	bHLH	ybHLH022	[94]	AT3G19860	bHLH121-URI	44.3105	24.3285	17.5105	27.785		16.5557	20.6343	17.9993	27.577
Solyc01g150101	Basic helix-loop-helix	bHLH	bHLH158		AT1G31050	PFA1	5.214	4.738	0.2285	0.613		5.116	3.94433	1.528	6.697
Solyc02g062690	bHLH transcription factor 012	bHLH	ybHLH023	[94]	AT2G18300/AT4G36540	HBI1/BEE2	108.483	198.605	44.3005	24.9175		40.6113	57.0787	30.0857	34.5857
Solyc02g063430	bHLH transcription factor 078	bHLH	ybHLH024	[94]			6.105	8.532	3.0615	4.0485		7.77533	4.745	30.949	15.9963
Solyc02g070880	Helix-loop-helix DNA-binding	bHLH	ybHLH025	[94]	AT1G29950	SACL3	22.934	148.03	88.0105	110.153		82.251	67.4717	56.6263	67.626
Solyc02g076920	bHLH transcription factor 013	bHLH	ybHLH026	[94]			0.0285	0.019	0.11	0.1955		0.517333	0.765667	2.07033	6.71567
Solyc02g078130	bHLH transcription factor 079	bHLH	ybHLH027	[94]	AT4G20970		1.1165	2.82	0.6005	1.5225		28.0177	6.26333	3.17467	4.98133
Solyc02g079760	Basic helix-loop-helix	bHLH	ybHLH028	[94]	AT1G61660	PFA4-AtbHLH112	22.8605	81.511	21.4445	17.7045		94.3787	53.212	29.3327	45.9767
Solyc02g079810	bHLH transcription factor 080	bHLH	ybHLH029	[94]	AT4G21330	DYT1	0.7745	0.16	0.1745	0.07		0.816667	0.260667	0.537	0.31
Solyc02g079970	bHLH transcription factor 014	bHLH	ybHLH030	[94]			149.892	195.692	116.189	155.434		156.035	134.566	112.604	126.003
Solyc02g084880	Basic helix-loop-helix	bHLH	ybHLH031	[94]			7.972	45.034	24.317	38.0095		18.759	44.1277	41.1363	58.9267
Solyc02g087860	Transcription factor PRE5	bHLH	ybHLH032	[94]	AT3G28857/AT5G15160/AT5G39860	PRE5/BHLH134-BNQ2/BHLH136-PRE1-BNQ1-
Solyc02g090950	Transcription factor HEC2	bHLH	ybHLH033	[94]	AT3G50330/AT5G67060	HEC2/HEC1
Solyc02g091440	Basic helix-loop-helix	bHLH	ybHLH034	[94]	AT1G66470/AT5G37800	RHD6-AtRHD6/RSL1-ATRSL1	0	0	0.0265	0.0095		0.228667	0.117667	1.42533	1.04467
Solyc02g091690	bHLH transcription factor 081	bHLH	ybHLH035	[94]			11.946	3.908	1.931	2.669		4.19733	10.737	23.246	12.3447
Solyc02g091800	Basic helix-loop-helix	bHLH	ybHLH036	[94]			0.0285	0.2495	0.5025	1.011		0.953667	0.239333	0.606333	2.01067
Solyc02g091810	bHLH transcription factor 015	bHLH	ybHLH037	[94]			0.091	0.0425	0.396	0.1665		7.03	0.202667	0.288	0.143
Solyc02g091820	bHLH transcription factor 016	bHLH	ybHLH038	[94]			0	0.047	0.0665	0.029		14.3187	0.0416667	0.023	0.0163333
Solyc02g093280	bHLH transcription factor 017	bHLH	ybHLH039	[94]	AT4G36930	SPT	5.933	4.543	3.202	4.949		1.269	2.49967	4.544	3.062
Solyc03g005350	bHLH transcription factor 018	bHLH	ybHLH040	[94]			20.35	18.6845	13.869	15.783		15.387	17.2223	15.2533	18.8943
Solyc03g006910	bHLH transcription factor 019	bHLH	ybHLH041	[94]	AT4G25410		3.868	33.1295	50.2465	34.555		10.3693	13.8397	18.4267	6.787
Solyc03g007410	Basic helix-loop-helix	bHLH	ybHLH042	[94]	AT5G53210	SPCH	16.4275	15.2855	5.233	4.902		4.633	2.73933	2.102	1.22267
Solyc03g031450	Basic helix-loop-helix	bHLH	bHLH159				0.076	0.305	0.008	0		0.799667	0.342333	1.20133	3.35
Solyc03g034000	bHLH transcription factor 020	bHLH	ybHLH043	[94]			133.105	20.453	8.5185	12.7825		21.8387	5.38	4.39733	6.19967
Solyc03g044460	Basic helix-loop-helix	bHLH	ybHLH044	[94]			0	1.95	0.3105	0		0.0346667	2.06133	0.388333	0.803333
Solyc03g095980	bHLH transcription factor 021	bHLH	ybHLH045	[94]	AT2G40200		28.0065	50.736	27.788	38.51		9.94833	5.997	3.86167	11.439
Solyc03g097820	bHLH transcription factor 022	bHLH	ybHLH046	[94]	AT5G50915	CKG	17.7285	27.21	47.1025	31.714		12.0467	6.643	6.087	16.931
Solyc03g112995	Transcription factor PRE5	bHLH	bHLH160
Solyc03g113560	Transcription factor bHLH79	bHLH	ybHLH047	[94]			3.149	3.1375	1.996	1.8715		3.48167	1.27333	3.32467	2.73
Solyc03g114230	bHLH transcription factor 082	bHLH	ybHLH048	[94]			0.019	0	0	0		4.86933	0.0116667	0	0.037
Solyc03g114233	Basic helix-loop-helix	bHLH	bHLH161
Solyc03g114237	Basic helix-loop-helix	bHLH	bHLH162
Solyc03g114720	bHLH transcription factor 023	bHLH	ybHLH049	[94]	AT5G08130	BIM1	32.97	87.1775	56.2075	45.287		105.485	24.5237	28.488	23.7803
Solyc03g115540	bHLH transcription factor 024	bHLH	ybHLH050	[94]	AT5G61270	PIF7	6.1635	7.5045	5.1125	5.583		12.9967	2.005	1.53267	0.694333
Solyc03g116340	bHLH transcription factor 025	bHLH	bHLH163		AT3G47640	PYE	36.039	36.71	33.9505	40.4245		256.871	26.7623	22.2247	43.5813
Solyc03g118310	bHLH transcription factor 083	bHLH	bHLH164		AT3G26744	SCRM-ICE1-SCREAM-ATICE1	0.218	0.187	0.331	1.7725		0.100333	2.24867	3.295	5.369
Solyc03g119390	bHLH transcription factor 026	bHLH	ybHLH051	[94]	AT1G73830	BEE3	39.3735	6.875	1.0095	3.353		14.105	2.91467	4.48067	6.77667
Solyc03g120530	Basic helix-loop-helix	bHLH	ybHLH052	[94]			9.4335	15.858	6.426	9.482		12.356	12.0977	8.11333	15.779
Solyc03g121240	Transcription factor HEC2	bHLH	ybHLH053	[94]	AT3G21330		0.5345	0.5295	0.0835	0.16		2.05033	0.572667	0.159667	0.154667
Solyc04g005130	bHLH transcription factor 027	bHLH	ybHLH054	[94]			21.468	14.9635	8.088	6.9945		13.2713	10.7527	14.6537	7.849
Solyc04g005220	Transcription factor bHLH62	bHLH	ybHLH055	[94]
Solyc04g005280	bHLH transcription factor 028	bHLH	ybHLH056	[94]	AT1G69010	BIM2	24.416	25.1225	17.175	18.613		20.775	20.5277	19.548	21.5287
Solyc04g005660	transcription factor PRE6-like	bHLH	ybHLH057	[94]			1.338	0.9225	0.0485	0.242		0.125333	0.0126667	0.201333	0.282667
Solyc04g006990	bHLH transcription factor 029	bHLH	ybHLH058	[94]			7.45	6.6795	0.9025	1.006		4.93733	12.2777	9.553	13.7847
Solyc04g007300	bHLH transcription factor 030	bHLH	ybHLH059	[94]	AT1G25330	CES-HAF	0.2715	0.4405	0.242	0.9885		1.52467	0.063	0.023	0.0386667
Solyc04g007430	bHLH transcription factor 031	bHLH	ybHLH060	[94]
Solyc04g014360	bHLH transcription factor 032	bHLH	ybHLH061	[94]			10.3115	3.221	0.5535	2.1715		7.717	11.4847	12.7947	16.403
Solyc04g056535	Basic helix-loop-helix	bHLH	bHLH165
Solyc04g074810	Basic helix-loop-helix	bHLH	ybHLH062	[94]	AT1G72210	bHLH096-bHLH96	1.6755	4.6675	2.408	1.484		3.91567	15.125	26.3743	13.893
Solyc04g076030	transcription factor bHLH143-like	bHLH	bHLH166		AT5G09460/AT5G64340	SACL1/SAC51	90.758	113.454	131.796	118.187		87.7493	127.375	122.985	139.181
Solyc04g076240	bHLH transcription factor 033	bHLH	ybHLH063	[94]
Solyc04g076845	Basic helix-loop-helix	bHLH	ybHLH001	[94]	AT5G65640	NFL-bHLH093	4.2865	122.361	20.615	21.9445		6.563	5.576	115.279	84.425
Solyc04g077480	bHLH transcription factor 034	bHLH	ybHLH064	[94]	AT1G10120	CIB4	29.217	28.9775	25.8485	25.346		51.2003	22.4447	44.5933	45.6677
Solyc04g077960	Transcription factor bHLH85	bHLH	ybHLH065	[94]	AT1G27740	RSL4	0.091	0.235	0.073	0.019		0.075	0.087	0.731	0.691
Solyc04g078690	bHLH transcription factor 035	bHLH	ybHLH066	[94]			100.919	37.669	31.226	32.1965		11.5387	14.117	15.7503	18.0603
Solyc04g078790	Transcription factor HEC1	bHLH	ybHLH067	[94]	AT3G50330/AT5G67060	HEC2/HEC1	0.114	1.9925	6.459	2.1015		0.426333	1.539	1.36333	1.24733
Solyc04g080710	Basic helix-loop-helix	bHLH	ybHLH068	[94]	AT1G27660	PFA5	28.12	15.7415	2.2535	2.5585		13.1923	12.742	9.42967	13.15
Solyc05g005300	bHLH transcription factor 084	bHLH	ybHLH069	[94]	AT1G10610		0.3415	0.829	0.1775	0.8955		0.244667	0.747667	0.922	0.861333
Solyc05g006650	bHLH transcription factor 036	bHLH	ybHLH070	[94]	AT1G59640/AT5G62610	BPEp-BPE-ZCW32-BPEub	306.128	86.567	54.6795	32.1705		79.276	28.7643	43.844	39.1963
Solyc05g007210	Transcription factor PRE4	bHLH	ybHLH071	[94]	AT1G26945	PRE6-KDR	0.816	1.33	0.4835	0.8065		2.921	1.21833	1.27533	0.522
Solyc05g009640	bHLH transcription factor 037	bHLH	ybHLH072	[94]
Solyc05g009880	bHLH transcription factor 038	bHLH	ybHLH073	[94]	AT1G68810	T5L1-ABS5	20.2625	14.781	1.879	1.958		37.7673	23.1637	33.2647	56.8743
Solyc05g010610	bHLH transcription factor 039	bHLH	ybHLH074	[94]	AT1G68920	bHLH49-CIL1	17.6495	14.1325	12.1405	15.3485		9.96467	12.7317	15.4273	18.9723
Solyc05g011810	bHLH transcription factor 040	bHLH	ybHLH075	[94]			25.11	16.8015	11.3355	10.7705		16.6313	11.2977	11.685	13.6303
Solyc05g014590	Basic helix-loop-helix	bHLH	ybHLH076	[94]			0.1825	1.633	2.155	2.7905		0.558	0.442667	3.30233	1.10667
Solyc05g050560	Transcription factor bHLH13	bHLH	ybHLH077	[94]			9.6235	9.7805	5.294	8.5485		75.9087	13.6417	9.993	10.3057
Solyc05g053660	Basic helix-loop-helix	bHLH	ybHLH078	[94]	AT3G24140	FMA	1.1315	2.7275	0.757	0.514		1.44167	1.811	0.520333	0.452333
Solyc06g008030	bHLH transcription factor 041	bHLH	ybHLH079	[94]	AT2G20180	PIF1-PIL5	190.233	17.779	32.5125	48.0055		18.2733	25.8303	31.095	39.037
Solyc06g035490	bHLH transcription factor 042	bHLH	ybHLH080	[94]	AT5G51780/AT5G51790	bHLH	2.0595	4.1535	2.0415	1.602		20.5187	2.09533	2.32867	1.74833
Solyc06g050840	bHLH transcription factor135	bHLH	ybHLH081	[94]	AT2G40435/AT3G56220		1.171	0.122	0	0.1345		0.651667	0.142333	1.144	0.614
Solyc06g051260	bHLH transcription factor 043	bHLH	ybHLH082	[94]			155.389	271.807	120.865	117.297		86.3693	58.9023	39.677	74.3817
Solyc06g051550	fe inefficient	bHLH	ybHLH083	[94]	AT2G28160	BHLH029-FIT-ATFIT1-FRU	0.0285	0.17	0.159	0.0865		0.433667	2.166	11.4427	23.5977
Solyc06g062460	bHLH transcription factor136	bHLH	ybHLH084	[94]
Solyc06g064580	bHLH transcription factor 044	bHLH	ybHLH085	[94]
Solyc06g064590	bHLH transcription factor 045	bHLH	ybHLH086	[94]
Solyc06g065040	bHLH transcription factor 086	bHLH	ybHLH087	[94]			15.0265	22.888	17.301	20.336		26.1813	12.9617	14.209	19.8073
Solyc06g066580	bHLH transcription factor137	bHLH	bHLH167				26.7005	13.085	13.272	13.6635		10.2103	12.0217	11.8137	17.1813
Solyc06g068870	bHLH transcription factor 087	bHLH	ybHLH088	[94]	AT3G26744	SCRM-ICE1-SCREAM-ATICE1	77.0805	44.809	43.642	43.394		27.546	42.1053	41.9807	48.054
Solyc06g069370	bHLH transcription factor 046	bHLH	ybHLH089	[94]			5.513	21.8715	19.5645	13.5275		23.4163	25.3117	22.536	15.2117
Solyc06g069600	bHLH transcription factor 047	bHLH	ybHLH090	[94]
Solyc06g070910	Unknown protein	bHLH	ybHLH091	[94]			0	0	0	0		0.580333	0.065	1.88133	1.28833
Solyc06g072520	bHLH transcription factor GBOF-1	bHLH	ybHLH092	[94]			0.2115	0.066	0.39	0.473		1.20933	0.283333	0.269	0.473
Solyc06g074110	Transcription factor	bHLH	bHLH168		AT2G27230	LHW	34.2605	16.195	14.422	15.3195		26.719	22.6867	44.9743	50.5873
Solyc06g083170	bHLH transcription factor 049	bHLH	ybHLH093	[94]			3.3265	9.9585	5.141	3.345		16.9753	7.73733	15.2017	11.876
Solyc06g083980	bHLH transcription factor138	bHLH	ybHLH094	[94]	AT4G16430	bHLH3-bHLH003-JAM3-bHLH03	30.1645	26.0035	30.476	29.0735		34.456	32.1877	32.5143	31.242
Solyc07g005400	bHLH transcription factor 050	bHLH	ybHLH095	[94]			5.518	38.157	43.013	35.3585		22.129	54.89	46.7683	54.1207
Solyc07g006310	transcription factor IBH1-like	bHLH	bHLH169		AT5G57780	P1R1	7.2275	0.776	0.022	0.313		0.855	0.0483333	0.19	0.0786667
Solyc07g018010	bHLH transcription factor139	bHLH	ybHLH096	[94]	AT5G57150		6.469	24.941	29.189	30.5285		43.6103	16.1667	15.9513	10.2893
Solyc07g020960	bHLH transcription factor140	bHLH	bHLH170		AT4G29100	PFA3-BHLH68	72.102	46.7765	29.292	29.4865		40.0657	39.785	29.589	40.2747
Solyc07g039570	bHLH transcription factor 051	bHLH	ybHLH097	[94]	AT5G56960
Solyc07g043580	bHLH transcription factor 052	bHLH	ybHLH098	[94]	AT2G43010/AT3G59060	SRL2-AtPIF4-PIF4/bHLHb1-A-PUT2-PIF5-PIL6	267.55	23.1695	68.7485	76.682		108.866	29.058	35.342	42.069
Solyc07g052670	bHLH transcription factor 053	bHLH	ybHLH099	[94]			10.635	14.518	26.8435	25.966		9.857	16.7447	16.0993	46.0217
Solyc07g052930	bHLH transcription factor141	bHLH	ybHLH100	[94]	AT3G22100
Solyc07g053290	bHLH transcription factor 054	bHLH	ybHLH101	[94]			44.5215	90.4085	63.777	52.673		10.2937	52.1883	38.9013	50.6593
Solyc07g062200	bHLH transcription factor 088	bHLH	ybHLH102	[94]			0	0.0095	0.418	0.549		0.00933333	0.0196667	0.443333	0.813667
Solyc07g063830	bHLH transcription factor142	bHLH	ybHLH103	[94]	AT3G20640	PFA6	5.423	3.0155	0.21	0.197		10.598	3.78967	2.92567	4.61833
Solyc07g064040	bHLH transcription factor143	bHLH	ybHLH104	[94]	AT5G54680	ILR3-bHLH105	96.915	163.023	158.338	141.126		145.629	140.481	127.719	113.303
Solyc08g005050	transcription factor MYC2	bHLH	bHLH171				27.3705	44.643	22.427	26.801		212.794	27.5503	19.713	21.7657
Solyc08g008600	bHLH transcription factor 055	bHLH	bHLH172
Solyc08g062780	bHLH transcription factor 089	bHLH	ybHLH105	[94]	AT2G16910	AMS	0.288	0.5625	0.632	0.44		0.488667	0.632	0.731667	0.693
Solyc08g075090	bHLH transcription factor144	bHLH	ybHLH106	[94]	AT2G01250/AT2G44120/AT3G13580	RPL7B	202.535	295.899	173.655	257.05		185.381	397.657	266.693	243.53
Solyc08g075110	bHLH transcription factor145	bHLH	ybHLH107	[94]	AT2G34820
Solyc08g076820	bHLH transcription factor146	bHLH	ybHLH108	[94]	AT5G46690	bHLH071	0.1845	0.514	1.736	1.326		0.200667	0.0366667	0.227667	0.169667
Solyc08g076930	jasmonic acid 3	bHLH	ybHLH109	[94]	AT1G32640	JAI1-ZBF1-JIN1-ATMYC2	32.5935	55.4035	60.6245	53.3235		494.083	80.1067	59.1133	57.8737
Solyc08g081140	bHLH transcription factor 090	bHLH	ybHLH110	[94]	AT1G63650/AT5G41315	EGL1-ATMYC-2-EGL3-AtEGL3/GL3-MYC6.2	39.702	47.404	46.6135	49.4535		26.309	30.887	38.8117	38.31
Solyc08g082940	Transcription factor	bHLH	bHLH173		AT1G64625	LL1-FST-LHL3-	17.0305	8.9715	12.131	17.144		3.09633	13.1227	20.135	25.2757
Solyc08g083170	bHLH transcription factor 056	bHLH	ybHLH111	[94]
Solyc09g005070	bHLH transcription factor148	bHLH	ybHLH112	[94]	AT5G01305	ROX
Solyc09g011170	Prf interactor 30137	bHLH	bHLH174				339.89	337.182	275.086	294.56		163.295	243.005	273.387	491.711
Solyc09g018130	bHLH transcription factor 091	bHLH	ybHLH113	[94]
Solyc09g018150	bHLH transcription factor149	bHLH	ybHLH114	[94]
Solyc09g057710	bHLH transcription factor 057	bHLH	ybHLH115	[94]			29.09	18.1425	20.4695	18.4025		36.1913	33.421	44.1893	38.4287
Solyc09g063010	bHLH transcription factor 058	bHLH	ybHLH116	[94]			27.764	39.4625	29.179	24.437		51.3603	14.583	16.1887	16.0397
Solyc09g064920	transcription factor UNE12-like	bHLH	ybHLH117	[94]	AT5G64980		9.2125	7.7095	5.809	7.061		4.384	6.66267	5.958	8.895
Solyc09g065100	bHLH transcription factor 150	bHLH	ybHLH118	[94]	AT4G09820	AtTT8-BHLH42-TT8-	1.669	4.742	27.389	2.978		6.75833	7.57667	7.038	0.811333
Solyc09g065820	bHLH transcription factor 059	bHLH	ybHLH119	[94]	AT4G02590	bHLH059-PFB1-UNE12-	94.0075	96.003	75.938	76.739		127.219	85.1223	82.8757	101.105
Solyc09g066280	Transcription factor bHLH155-like protein	bHLH	bHLH175		AT1G06150/AT2G31280	EMB1444-LHL1/LL2-CPUORF7-LHL2-	175.306	32.104	22.601	23.7295		75.4613	51.225	62.6687	54.2313
Solyc09g074805	Basic helix-loop-helix	bHLH	ybHLH120	[94]
Solyc09g083220	bHLH transcription factor 060	bHLH	ybHLH121	[94]			44.6735	68.106	48.5565	55.755		39.8443	51.2783	42.1393	68.4573
Solyc09g083360	Transcription factor bHLH92	bHLH	ybHLH122	[94]	AT5G43650	BHLH92	0.3285	0.118	0.181	0.139		49.1227	0.296333	0.195333	0.166667
Solyc09g089870	bHLH transcription factor 061	bHLH	ybHLH123	[94]	AT4G14410	bHLH104	71.3535	70.5225	44.4905	54.8815		52.514	39.6587	36.1093	38.5
Solyc09g091760	bHLH transcription factor 151	bHLH	ybHLH124	[94]			0.3965	2.504	0.3045	0.881		0.237667	0.321667	0.0583333	0.0933333
Solyc09g097870	bHLH transcription factor 062	bHLH	ybHLH125	[94]	AT3G07340	CIB3	54.5315	107.61	39.223	35.913		58.0013	78.2173	69.0903	67.0587
Solyc09g098110	bHLH transcription factor 092	bHLH	ybHLH126	[94]	AT1G05805	AKS2	51.907	39.0475	23.8225	20.5505		12.1637	21.9517	33.852	41.008
Solyc10g006510	bHLH transcription factor152	bHLH	ybHLH127	[94]			20.9695	12.336	22.213	17.2415		12.1383	17.2777	20.4197	18.022
Solyc10g006640	bHLH transcription factor153	bHLH	ybHLH128	[94]	AT3G20640	PFA6	1.9965	1.389	0.35	0.431		4.66133	4.74767	1.982	3.39
Solyc10g008243	transcription factor bHLH36-like	bHLH	bHLH176
Solyc10g008247	transcription factor bHLH36-like	bHLH	ybHLH129	[94]			0.361	0.614	0.0915	0.5205		0.395333	1.72933	0.675667	0.513667
Solyc10g008260	bHLH transcription factor 093	bHLH	ybHLH130	[94]
Solyc10g008263	transcription factor bHLH36-like	bHLH	bHLH177
Solyc10g008270	bHLH transcription factor 094	bHLH	ybHLH131	[94]			0.372	0.1035	0.6215	0.484		1.303	0.419667	0.721	1.04133
Solyc10g009270	bHLH transcription factor154	bHLH	ybHLH132	[94]
Solyc10g009290	bHLH transcription factor155	bHLH	ybHLH133	[94]	AT4G00870	bHLH014-bHLH14	7.9205	3.4615	0.8765	1.275		20.5923	1.396	2.614	4.636
Solyc10g018510	bHLH transcription factor 063	bHLH	ybHLH134	[94]
Solyc10g049720	bHLH transcription factor 156	bHLH	ybHLH135	[94]	AT2G14760
Solyc10g049780	bHLH transcription factor157	bHLH	ybHLH136	[94]
Solyc10g078380	bHLH transcription factor 064	bHLH	ybHLH137	[94]	AT2G41130	STC8-bHLH106	0.364	0.1925	0.1555	0.1675		0.369667	1.158	1.033	1.94133
Solyc10g079050	BHLH transcription factor o95	bHLH	ybHLH138	[94]	AT2G42280	FBH4-AKS3	12.753	5.906	2.824	2.229		4.54567	9.03	13.8747	10.3127
Solyc10g079070	bHLH transcription factor 065	bHLH	ybHLH139	[94]	AT2G42300	bHLH48	123.397	61.447	57.4845	54.851		40.5053	65.9723	58.1367	57.9933
Solyc10g079650	bHLH transcription factor 066	bHLH	ybHLH140	[94]	AT2G41240/AT3G56970	BHLH100/ORG2-bHLH38-BHLH038-	0	0	0	0		0.728667	0.0413333	0.096	3.27067
Solyc10g079660	bHLH transcription factor 067	bHLH	bHLH178		AT3G56980	bHLH39-ORG3-BHLH039-	0	0	0	0		0.245	0.01	0.0113333	0.754333
Solyc10g079680	bHLH transcription factor 068	bHLH	ybHLH141	[94]			1.707	0.0095	0	0		0.741333	0.013	0	2.238
Solyc11g005780	bHLH transcription factor158	bHLH	ybHLH142	[94]	AT5G09750	HEC3
Solyc11g010340	bHLH transcription factor 069	bHLH	ybHLH143	[94]			2.05	0.057	0.0235	0.275		1.19167	0.455	0.545	0.957333
Solyc11g056650	bHLH transcription factor 096	bHLH	ybHLH144	[94]			32.7395	36.956	34.403	50.0995		17.3853	22.2113	17.8873	35.015
Solyc11g068960	Transcription factor LHW	bHLH	bHLH179		AT2G27230	LHW	111.781	531.644	303.103	290.351		108.038	213.894	170.882	232.641
Solyc12g010170	bHLH transcription factor 070	bHLH	ybHLH145	[94]	AT2G24260	DROP1-LRL1	1.4845	7.887	7.4805	4.499		2.654	7.983	16.669	7.70433
Solyc12g010595	transcription factor bHLH36-like	bHLH	bHLH180				0	0.7275	0.05	0.1055		0.0126667	1.46967	0.170667	0.156
Solyc12g036430	transcription factor bHLH95-like	bHLH	bHLH181
Solyc12g036470	bHLH transcription factor 071	bHLH	ybHLH146	[94]	AT1G18400/AT1G73830	BEE1/BEE3	7.616	31.223	20.985	11.372		9.527	7.78167	3.85367	1.066
Solyc12g042010	transcription factor IBH1-like	bHLH	ybHLH147	[94]	AT2G43060	AtIBH1-IBH1	2.0545	21.2865	21.5305	30.769		27.7693	19.7167	21.0023	13.383
Solyc12g087850	Basic helix-loop-helix	bHLH	ybHLH148	[94]			0.1495	0.1785	0.1405	0.067		0.426333	0.216333	2.65467	2.52933
Solyc12g088130	Basic helix-loop-helix	bHLH	ybHLH149	[94]			0	0.0095	0.008	0		0	0.154333	12.604	8.07833
Solyc12g088790	bHLH transcription factor159	bHLH	ybHLH150	[94]
Solyc12g098620	bHLH transcription factor 072	bHLH	ybHLH151	[94]			1.03	1.779	1.3275	2.314		6.75767	2.066	10.382	10.456
Solyc12g100140	Transcription factor bHLH80	bHLH	ybHLH152	[94]	AT1G51140	AKS1-CFLAP1-FBH3-	70.571	53.6405	41.1435	36.342		34.831	46.6663	32.2197	37.521
Solyc01g008730	BZIP transcription factor	bZIP	bZIP01	[89]	AT3G12250/AT5G06950/AT5G06960	TGA6/TGA2/TGA5	26.9925	19.228	16.8405	17.9095		15.6827	17.664	15.534	20.677
Solyc01g008980	Abscisic acid-insensitive 5-like protein	bZIP	bZIP02	[89]			10.1975	6.998	6.475	7.013		5.591	6.07667	5.845	7.11033
Solyc01g009510	Abscisic acid responsive elements-binding factor 2	bZIP	bZIP03	[89]
Solyc01g079480	BZIP transcription factor	bZIP	bZIP04	[89]			78.59	60.3775	34.6505	49.315		139.031	34.5603	50.789	43.034
Solyc01g095460	Common plant regulatory factor 1	bZIP	bZIP05	[89]	AT2G46270	GBF3	25.839	46.0825	45.5545	57.3915		81.121	40.0887	37.051	43.285
Solyc01g097330	Light-inducible protein CPRF2	bZIP	bZIP06	[89]	AT5G28770	bZIP63-AtbZIP63-BZO2H3-	134.007	56.432	38.697	60.693		41.3133	22.7753	31.2897	44.8107
Solyc01g100460	BZIP transcription factor	bZIP	bZIP07	[89]			6.0595	9.476	3.3625	7.9685		2.991	4.996	2.41567	7.495
Solyc01g103873	Basic-leucine zipper	bZIP			AT1G58110		6.3035	8.9925	11.811	8.4805		10.7603	7.98233	9.696	9.68533
Solyc01g103875	Basic-leucine zipper	bZIP			AT1G58110		6.7885	7.8775	8.728	8.4555		6.08367	5.12433	7.22133	7.124
Solyc01g104650	ABSCISIC ACID-INSENSITIVE 5-like protein 5	bZIP	bZIP08	[89]			8.534	22.695	26.0675	23.11		4.999	14.7807	11.14	20.141
Solyc01g108080	ABSCISIC ACID-INSENSITIVE 5-like protein 7	bZIP	bZIP09	[89]	AT3G19290/AT4G34000	AtAREB2-AREB2-ABF4/ABF3-AtABF3-DPBF5-	23.868	31.908	33.195	34.9935		31.4703	35.9533	48.9827	66.0803
Solyc01g109880	BZIP transcription factor	bZIP	bZIP10	[89]	AT1G75390	bZIP44-AtbZIP44	66.459	137.534	40.3135	35.567		69.6573	124.107	74.3193	43.8707
Solyc01g110480	Basic-leucine zipper	bZIP	bZIP11	[89]	AT4G38900	DKML-bZIP29	74.8125	86.0245	123.212	115.096		298.58	97.5117	107.924	94.8303
Solyc01g111580	Basic-leucine zipper	bZIP	bZIP12	[89]	AT2G16770	bZIP23-AtbZIP23	61.0555	33.6265	25.02	27.5765		107.346	27.049	33.224	29.834
Solyc02g061990	BZIP transcription factor FD	bZIP					0.4475	0.033	0.337	13.978		0.103667	0.137	0.435	1.48533
Solyc02g062950	G-box binding	bZIP	bZIP13	[89]	AT4G36730	AtGBF1-GBF1	84.235	43.88	32.9315	37.3165		47.449	18.5677	27.5377	38.0743
Solyc02g083520	self-pruning G-box protein	bZIP	bZIP14	[89]	AT4G35900	FD-1-atbzip14-FD-	4.145	0.617	0.535	1.037		0.879	0.288	0.264333	0.721667
Solyc02g084860	BZIP transcription factor	bZIP	bZIP15/19	[89]	AT4G34590	BZIP11-ATB2-GBF6-AtbZIP11	0.042	0.075	0.2355	0.225		1.36733	8.37567	13.777	8.51
Solyc02g085610	LEGBF4G L.esculentum GBF4G-box binding protein	bZIP	bZIP16	[89]			12.7455	11.6305	10.2565	14.601		14.3983	12.757	13.7407	15.41
Solyc02g089420	Basic leucine zipper 43	bZIP	bZIP17	[89]	AT5G15830	AtbZIP3-bZIP3	13.739	12.093	3.5275	6.0035		10.4593	4.11933	2.073	3.661
Solyc02g092090	basic leucine zipper 43-like	bZIP	bZIP18	[89]			9.0695	1.544	1.605	4.259		3.92467	5.24767	3.72533	7.78467
Solyc03g043895	Basic-leucine zipper domain-containing protein	bZIP	bZIP24	[89]	AT4G37730	AtbZIP7-bZIP7	0.5955	42.374	31.9305	19.8355		2.77267	17.9647	5.739	13.3703
Solyc03g046440	Basic leucine zipper 43	bZIP	bZIP20/21/22/25	[89]			0.792	0.374	0.008	0.1395		2.83267	0.928	0.677667	0.699
Solyc04g005170	Basic leucine zipper 43	bZIP	bZIP26	[89]			0.148	0.376	0	0.0095		0.162667	2.298	2.44767	3.28267
Solyc04g011670	Transcription factor TGA7	bZIP	bZIP27	[89]	AT5G10030/AT5G65210	TGA4-OBF4/TGA1	35.589	21.275	36.357	38.9875		15.9913	41.951	35.5837	62.1153
Solyc04g054320	leucine-zipper transcription factor	bZIP	bZIP28	[89]			13.426	10.899	15.9395	16.763		22.225	64.1933	68.1237	74.088
Solyc04g056460	TGACG-sequence-specific DNA-binding protein TGA-1B	bZIP	bZIP29	[89]	AT2G40950	BZIP17
Solyc04g056470	BZIP transcription factor 17	bZIP	bZIP57	[89]
Solyc04g071160	Basic-leucine zipper	bZIP	bZIP30	[89]	AT1G43700	SUE3-VIP1-AtVIP1-	46.4215	45.5215	36.75	36.148		33.8983	40.618	37.9163	49.748
Solyc04g071510	Protein ABSCISIC ACID-INSENSITIVE 5	bZIP	bZIP31	[89]	AT1G03970	GBF4/AT5G44080	14.7465	12.0315	9.4075	9.237		13.0163	10.549	10.2713	13.087
Solyc04g072460	Transcription factor TGA7	bZIP	bZIP32	[89]	AT1G22070/AT1G77920	TGA3/TGA7	49.6025	32.2585	29.042	25.0855		26.0327	62.7327	54.0933	53.7813
Solyc04g078840	AREB	bZIP	bZIP33	[89]	AT1G45249	AtABF2-ABF2-ATAREB1-AREB1	20.023	48.0375	28.7545	77.8605		40.732	44.6623	34.0333	50.07
Solyc04g080740	BZIP transcription factor	bZIP	bZIP34	[89]	AT1G75390	bZIP44-AtbZIP44	38.1305	49.223	18.208	19.689		19.6133	32.942	20.8287	21.4813
Solyc04g081190	vsf-1	bZIP	bZIP35	[89]			13.417	42.0545	33.42	32.8815		22.6207	33.6793	31.077	30.4243
Solyc04g082890	BZIP transcription factor protein	bZIP	bZIP36	[89]	AT1G42990	ATBZIP60-BZIP60	121.885	138.921	145.548	164.33		127.997	130.561	134.543	162.751
Solyc05g009660	Transcription factor PERIANTHIA	bZIP	bZIP37	[89]	AT1G68640	TGA8-PAN	21.7575	11.7075	10.074	8.285		7.219	4.341	3.83367	1.89533
Solyc05g010516	Basic leucine zipper 43	bZIP			AT5G38800	AtbZIP43-bZIP43	2.0545	1.2085	0.186	0.6145		1.891	7.97333	2.62367	4.407
Solyc05g050220	Common plant regulatory factor 1	bZIP	bZIP38	[89]			1.737	0.61	1.8025	3.214		11.1263	2.921	3.15533	5.98667
Solyc06g009640	Basic-leucine zipper domain-containing protein	bZIP	bZIP39	[89]	AT3G62420	ATBZIP53-BZIP53	45.021	9.8315	13.4945	19.2695		23.8543	15.9883	14.7763	17.0317
Solyc06g048630	methionine sulfoxide reductase A1	bZIP	bZIP40	[89]	AT2G40620	bZIP18	50.301	40.218	41.0755	38.847		52.731	36.733	47.779	33.8077
Solyc06g049040	Basic-leucine zipper	bZIP	bZIP41	[89]	AT2G40620	bZIP18	31.4615	13.3275	7.436	7.875		16.098	8.541	10.901	8.90467
Solyc06g053350	Basic-leucine zipper	bZIP	bZIP42	[89]	AT1G06070	bZIP69	29.247	24.682	19.795	21.656		21.3883	23.2177	23.588	21.1017
Solyc06g060490	Basic-leucine zipper	bZIP	bZIP43	[89]	AT1G43700	SUE3-VIP1-AtVIP1-	47.516	35.557	29.6015	35.5595		41.488	46.967	46.3947	48.6517
Solyc06g074320	Transcription factor TGA2	bZIP	bZIP44	[89]	AT1G08320	bZIP21-TGA9	0.4115	2.6625	1.794	5.119		3.91633	11.8033	15.3923	21.8393
Solyc07g053450	Basic-leucine zipper	bZIP	bZIP45	[89]	AT2G42380	BZIP34-ATBZIP34-DEG7-	33.143	1.7995	0.44	0.405		4.115	0.452667	1.61533	1.132
Solyc07g062710	Basic-leucine zipper	bZIP	bZIP46	[89]			22.316	2.419	0.5085	0.3235		3.74067	0.928	5.07333	2.388
Solyc08g005290	bZIP transcription factor 16-like	bZIP	bZIP47	[89]	AT2G35530	AtbZIP16-bZIP16	21.1225	18.38	18.9315	23.229		16.0663	25.127	20.3137	25.5423
Solyc08g006110	Basic leucine zipper 9-like transcription factor	bZIP	bZIP48	[89]	AT5G24800	BZIP9-ATBZIP9-BZO2H2-	34.791	40.781	30.719	40.852		36.9003	43.1287	33.7617	39.9277
Solyc08g022080	BZIP transcription factor	bZIP	bZIP49	[89]			98.26	103.388	60.7	66.6675		58.258	52.508	54.6147	69.4093
Solyc08g061130	Transcription factor HY5	bZIP	bZIP50	[89]	AT5G11260	HY5-TED5	4.8445	14.929	2.5265	4.9935		7.99133	14.587	7.886	6.96
Solyc08g076100	GBF9G-box binding	bZIP	bZIP51	[89]	AT1G32150/AT2G35530	AtbZIP68-bZIP68/AtbZIP16-bZIP16	58.3615	32.344	38.1755	40.884		32.357	45.209	41.804	48.1697
Solyc09g009490	ABSCISIC ACID-INSENSITIVE 5-like protein 4	bZIP	bZIP52	[89]	AT2G36270	DPBF1-AtABI5-GIA1-ABI5	0.289	0.098	0.0695	0.1905		0.257	0.385	0.713	0.499667
Solyc09g009760	Basic-leucine zipper domain	bZIP	bZIP53	[89]	AT1G19490	bZIP62	0.0615	0.868	0.241	0.2935		0.921667	1.83833	1.61133	1.87233
Solyc10g050210	ABSCISIC ACID-INSENSITIVE 5-like protein 5	bZIP	bZIP54	[89]			0.0285	0.403	1.7765	2.1755		0.0436667	0.0606667	0.267667	0.261333
Solyc10g054010	BZIP transcription factor	bZIP	bZIP55	[89]			14.0655	21.2255	6.2125	4.2835		8.08267	6.99367	5.24733	4.78967
Solyc10g055550	Basic-leucine zipper	bZIP
Solyc10g076920	ABSCISIC ACID-INSENSITIVE 5-like protein 2	bZIP	bZIP56	[89]			6.4135	7.119	7.7315	7.319		5.11067	6.941	8.38533	8.212
Solyc10g078670	Transcription factor	bZIP	bZIP58	[89]	AT5G06839	bZIP65-TGA10	0.262	0.0655	0.044	0.1445		0.0656667	0.152333	0.735333	2.45333
Solyc10g080410	Transcription factor HBP-1b	bZIP	bZIP59	[89]	AT5G06839	bZIP65-TGA10	0.266	0.0845	0.253	0.5735		0.504667	0.399333	1.69067	6.422
Solyc10g080770	NPR1-interactor protein 1	bZIP	bZIP60	[89]			63.384	69.9325	61.9605	65.3515		61.6433	126.839	67.716	96.5453
Solyc10g081350	ABSCISIC ACID-INSENSITIVE 5-like protein 2	bZIP	bZIP61	[89]	AT3G56850	DPBF3-AREB3	37.641	23.2605	19.2715	21.0505		20.5873	14.7043	18.6433	20.8773
Solyc10g083380	Basic-leucine zipper	bZIP	bZIP62				6.8865	4.9725	2.6835	2.214		7.01533	3.53633	5.78	8.48367
Solyc11g006490	Basic-leucine zipper	bZIP	bZIP63		AT5G04840		8.6545	8.9845	5.382	5.5255		5.97667	10.354	14.181	15.0947
Solyc11g020950	Basic-leucine zipper	bZIP	bZIP64	[89]	AT1G35490
Solyc11g044560	ABSCISIC ACID-INSENSITIVE 5-like protein 5	bZIP	bZIP65	[89]			34.458	43.9275	51.767	48.545		35.5293	64.4083	60.5733	59.8197
Solyc11g064950	BZIP transcription factor	bZIP	bZIP66	[89]	AT3G12250/AT5G06960/AT5G06950	BZIP45-TGA6/AtTGA2-AHBP-1B-TGA2/OBF5-TGA5	34.0945	29.656	28.121	31.187		42.3983	29.1113	27.7307	34.002
Solyc11g068370	Transcription factor	bZIP	bZIP67	[89]			0.0475	0.9725	0.6915	0.6725		0.298	2.18267	2.12167	4.75633
Solyc12g010800	Basic-leucine zipper	bZIP	bZIP68	[89]	AT2G42380/AT3G58120	BZIP34-ATBZIP34-DEG7/BZIP61-ATBZIP61	36.4825	13.5145	7.8615	2.7265		25.789	1.60033	5.655	3.34933
Solyc12g056860	Transcription factor TGA7	bZIP	bZIP69	[89]	AT1G22070/AT1G77920	TGA3/TGA7	30.602	77.3185	43.892	44.0245		20.8187	80.3563	27.7837	44.42
Solyc00g014800	Zinc finger protein KNUCKLES	C2H2			AT5G14010	KNU
Solyc01g005060	Zinc finger protein	C2H2			AT1G25250/AT1G68130	IDD16/IDD14	15.9415	16.495	11.8155	12.158		19.7287	7.63067	7.64167	6.63633
Solyc01g005130	Zinc finger protein 1	C2H2		[86]	AT1G66140	ZFP4	26.475	39.7385	24.3375	27.901		17.3927	26.2283	18.1473	18.9563
Solyc01g010410	Zinc finger protein	C2H2		[86]	AT1G26610
Solyc01g058130	C2H2-type zinc finger protein	C2H2
Solyc01g060420	Zinc finger protein 8	C2H2		[86]
Solyc01g081630	UPSTREAM OF FLC-like protein	C2H2			AT1G05577	SOK1	0.19	0.122	0.1125	0.2105		0.831	0.117667	1.15133	2.19433
Solyc01g087050	Zinc finger protein	C2H2			AT3G20880	WIP4	0.5185	0.6525	0.579	1.293		0.357	0.190667	0.527	0.944333
Solyc01g090830	Zinc finger protein ZAT3	C2H2		[86]
Solyc01g090840	Zinc finger protein	C2H2			AT3G60580	ZAT9	1.6185	2.8615	2.6045	4.112		1.169	2.54067	2.42833	4.14233
Solyc01g099340	Protein indeterminate-domain 12	C2H2					31.763	33.2535	17.556	23.887		21.4083	19.0137	12	20.6687
Solyc01g101250	G-patch domain-containing protein	C2H2		[86]	AT5G26610		55.1815	62.156	35.4765	39.3375		27.6787	38.1333	33.302	39.1533
Solyc01g107170	Zinc finger protein	C2H2					7.239	7.123	1.7195	3.821		152.621	15.2527	4.19567	8.05733
Solyc02g032120	Zinc finger	C2H2		[86]			22.708	38.0795	31.4825	33.7555		25.49	31.6207	26.4413	28.991
Solyc02g061660	Unknown protein	C2H2
Solyc02g061700	Unknown protein	C2H2
Solyc02g062940	Zinc finger protein	C2H2			AT5G66730	ENY-IDD1	25.9295	31.7405	27.7685	27.982		21.5967	20.052	25.0417	26.0367
Solyc02g081620	Zinc finger	C2H2		[86]	AT1G30970	SUF4	47.6745	57.392	45.9375	46.205		44.2783	43.4427	46.5417	49.5543
Solyc02g085580	Protein indeterminate-domain 1	C2H2			AT3G50700/AT5G66730	AtIDD2-IDD2/ENY-IDD1	26.055	31.8395	24.2085	20.9225		25.1327	25.848	28.7567	40.3613
Solyc02g088670	UDP-glucose 6-dehydrogenase 1	C2H2
Solyc02g094170	Zinc finger protein	C2H2			AT5G14140		17.349	25.843	23.992	23.9275		28.1657	33.597	25.3247	29.6237
Solyc03g025440	Zinc finger, C2H2	C2H2			AT4G25610		38.257	25.6655	29.284	31.057		25.6	33.3723	33.6087	43.4263
Solyc03g059270	Zinc finger protein	C2H2					3.0015	1.3695	1.1185	0.94		1.02067	1.436	1.37367	2.479
Solyc03g083310	Zinc finger, C2H2	C2H2			AT4G06634	YY1-YINYANG1	17.4925	18.856	16.6365	19.0585		20.997	25.319	20.8157	22.6097
Solyc03g093870	Zinc finger protein ZAT7	C2H2
Solyc03g095270	zinc finger protein 4-like	C2H2
Solyc03g098070	C2H2-like zinc finger protein	C2H2					81.2175	30.5655	11.63	14.905		23.597	19.903	20.6023	14.8167
Solyc03g111590	Lysine-specific demethylase REF6	C2H2			AT3G48430	REF6-EIN6-JMJ12-	45.0705	30.986	44.216	39.138		27.754	40.6223	48.2543	42.371
Solyc03g115120	DNAJ protein JJJ1 homolog	C2H2					11.711	2.4965	4.3555	4.9165		1.663	1.42267	3.85767	4.09667
Solyc03g115450	Zinc finger protein	C2H2					0.9765	1.3505	0.3355	0.5065		1.99067	0.917333	2.494	3.083
Solyc03g117070	Zinc finger protein 4	C2H2			AT5G10970/AT5G25160	ZFP3	2.487	4.857	2.841	3.144		2.83967	3.515	5.336	7.73567
Solyc03g121660	Protein indeterminate-domain 7	C2H2			AT1G55110	IDD7-AtIDD7-REDSTART-	55.276	99.887	76.8075	58.772		85.379	71.9567	62.626	57.8473
Solyc04g005440	C2H2-like zinc finger protein	C2H2		[86]	AT1G26610		0.123	0.277	0.672	0.4585		0.404667	0.660333	1.043	0.900333
Solyc04g008500	Protein indeterminate-domain 6, chloroplastic	C2H2			AT2G02080/AT2G02070	IDD5-RVN-AtIDD5/IDD4-IME-AtIDD4	5.9865	2.3925	1.441	2.158		7.44833	5.79133	8.80433	11.6723
Solyc04g009600	TRAF-like superfamily protein	C2H2					3.702	5.4965	4.2375	3.303		4.80867	4.86333	4.437	4.07833
Solyc04g014540	Zinc finger protein 3	C2H2		[86]			7.36	5.1395	4.444	5.7035		4.287	7.662	8.51567	11.8063
Solyc04g015570	Zinc finger AN1 and C2H2 domain-containing stress-associated protein 16	C2H2			AT2G41835/AT3G57480	SAP13	7.6015	5.3435	5.8845	5.996		5.904	5.14733	5.313	6.259
Solyc04g028560	Lysine-specific demethylase REF6	C2H2					14.8185	15.1865	9.4935	9.9345		11.297	12.2813	11.0193	12.7777
Solyc04g056320	Zinc finger, C2H2	C2H2					31.717	38.629	34.71	23.955		33.606	86.783	35.902	42.8427
Solyc04g074250	Methyl-CpG binding domain protein	C2H2			AT1G22310	ATMBD8-MBD8	4.859	4.3845	6.1925	5.4705		4.68167	6.39	7.57167	6.466
Solyc04g074320	Zinc finger protein	C2H2			AT1G34790	WIP1-TT1
Solyc04g077980	C2H2-type zinc finger protein	C2H2			AT1G27730/AT5G04340	ZAT10-STZ/AtZAT6-ZAT6-CZF2-C2H2	63.5395	31.571	6.214	6.715		676.038	13.0853	7.133	10.316
Solyc04g080130	Zinc finger protein	C2H2					56.0515	45.362	42.6415	40.3905		40.6673	25.5913	37.7983	34.5967
Solyc04g081370	C2H2-like zinc finger protein	C2H2			AT1G75710		47.6355	11.9335	14.868	11.656		16.772	13.8563	17.6403	23.2677
Solyc05g006310	Zinc finger protein 5	C2H2		[86]	AT1G10480	ZFP5	1.125	33.103	2.2585	1.3585		14.4737	6.485	0.921667	3.521
Solyc05g009170	Zinc finger protein 8	C2H2					1.494	19.103	20.348	9.244		2.103	11.2003	13.6407	12.8823
Solyc05g009180	Zinc finger protein 8	C2H2		[86]	AT1G68360	GIS3	1.9665	16.8985	10.9585	9.5755		2.47433	7.539	6.91767	5.96733
Solyc05g009380	lyrate	C2H2			AT1G68480	JAG	0.0665	0.164	0.515	1.8255		0.0316667	0.05	0.750333	0.353667
Solyc05g009770	Zinc finger protein	C2H2			AT1G13290	WIP6-DOT5
Solyc05g050170	Unknown protein	C2H2
Solyc05g050860	Zinc finger protein	C2H2
Solyc05g054030	Zinc finger protein	C2H2					1.3355	1.246	0.383	0.147		0.507333	0.175333	0.0483333	0.033
Solyc05g054650	Zinc finger protein	C2H2			AT2G28710/AT2G37430	ZAT11	0.0095	9.242	1.345	0.5585		1.56767	8.094	1.99233	2.86733
Solyc05g054660	Zinc finger protein	C2H2					0.114	0.4905	0.078	0.0865		0.0533333	0.559667	0.091	0.445
Solyc05g055500	Zinc finger protein	C2H2			AT3G10470
Solyc06g005180	Zinc finger protein	C2H2			AT1G02040
Solyc06g036060	Zinc finger, C2H2	C2H2		[86]			9.997	5.319	6.6745	5.5945		6.279	6.12467	8.44267	9.28833
Solyc06g053720	Zinc finger protein	C2H2			AT3G23130	SUP-FON1-FLO10-
Solyc06g060480	Zinc finger protein ZAT4	C2H2		[86]	AT4G35280	DAZ2
Solyc06g060740	Zinc finger protein	C2H2					4.7235	3.6145	7.3365	7.3415		3.203	5.517	8.056	8.59633
Solyc06g061160	Transcriptional regulator SUPERMAN	C2H2
Solyc06g062670	Protein indeterminate-domain 7	C2H2			AT3G13810	AtIDD11-IDD11	8.74	20.844	24.9005	27.241		23.1043	44.8897	23.9087	38.3743
Solyc06g065440	Zinc finger protein STOP1-like protein	C2H2					75.3865	131.744	108.07	88.6645		54.9143	90.3607	89.0487	93.0953
Solyc06g068390	Zinc finger protein 4	C2H2					12.5685	1.9305	1.924	1.4175		12.401	1.06267	2.98033	2.409
Solyc06g072360	Zinc finger protein	C2H2			AT1G68130	IDD14alpha-AtIDD14-IDD14beta-IDD14	53.2715	33.751	3.228	2.202		29.0887	21.2643	13.8853	9.59333
Solyc06g074360	Zinc finger protein WIP3	C2H2					0.4435	1.582	0.4825	1.268		6.33933	5.055	5.511	9.29433
Solyc06g074800	Zinc finger protein	C2H2					15.6905	4.903	1.0445	2.318		3.136	2.81033	6.80967	6.432
Solyc06g075250	Zinc finger protein JACKDAW	C2H2					48.446	56.048	47.172	35.4475		81.0907	35.7137	41.7437	33.7957
Solyc06g075775	Zinc finger protein ZAT12	C2H2					0	0.4775	0.1535	0.03		0.169333	0.685	0.076	0.033
Solyc06g075780	Zinc finger protein	C2H2			AT3G46070		6.0215	3.494	2.3435	3.805		67.0957	9.57633	2.81	3.015
Solyc06g076820	Zinc finger family protein	C2H2			AT2G29660		284.615	141.671	107.508	119.832		158.699	123.647	91.01	88.4063
Solyc06g083940	Zinc finger, C2H2	C2H2		[86]
Solyc07g006880	Zinc finger protein 7	C2H2			AT5G57520	ZFP2-ATZFP2
Solyc07g053570	Zinc finger protein MAGPIE	C2H2			AT1G03840	MGP-IDD3	7.2675	8.3825	8.5985	7.885		2.09067	10.1767	6.56367	8.18567
Solyc07g063970	C2H2 zinc finger protein	C2H2			AT4G27240/AT5G54630		4.424	4.282	2.3775	3.107		2.35633	1.85167	4.214	3.044
Solyc07g066160	Zinc finger, C2H2-like protein	C2H2					0.504	0.3415	0.6015	0.52		0.16	0.281667	0.390667	0.508667
Solyc08g059770	zinc finger protein 1-like	C2H2
Solyc08g063040	Zinc-finger protein	C2H2			AT1G55110	IDD7-AtIDD7-REDSTART-	4.915	29.615	16.035	25.8115		101.957	14.9363	15.075	14.3657
Solyc08g077000	Zinc finger protein	C2H2			AT4G17810	ZP1-EMB3022
Solyc08g078590	Zinc finger protein	C2H2					0.2995	0.178	0.0255	0.4145		0.172333	0.196	0.628	0.569667
Solyc09g007550	Protein indeterminate-domain 12	C2H2			AT5G03150	JKD	12.064	12.335	11.491	7.083		7.78733	19.9993	27.7163	21.795
Solyc09g008440	Zinc finger protein	C2H2			AT5G03510		2.541	2.5175	1.0005	1.063		1.65167	0.874333	2.03367	2.05467
Solyc09g009120	Polyadenylation and cleavage factor-like protein 4	C2H2			AT2G36480		42.4955	43.298	38.137	38.6845		35.7187	50.3957	41.986	49.3373
Solyc09g011120	Zinc finger protein	C2H2			AT2G37740	ATZFP10-ZFP10	0	0.0375	0	0		0.106667	0.605667	1.61667	1.53067
Solyc09g065670	Protein indeterminate-domain 12	C2H2			AT4G02670	IDD12-AtIDD12	0.2845	0.5635	0.164	0.4295		0.131333	0.0893333	0.112	0.133333
Solyc09g066250	Transcriptional regulator TAC1	C2H2					0	0	0	0		0.0936667	0.396	0.186333	0.634
Solyc09g074780	Protein indeterminate-domain 2	C2H2					0.3545	10.7055	6.884	5.9905		0.709	6.58767	5.926	8.78033
Solyc09g089590	Transcriptional regulator TAC1	C2H2			AT3G23130	SUP-FON1-FLO10-
Solyc09g089600	Zinc finger protein	C2H2			AT3G53820/AT5G43540
Solyc09g090260	Unknown protein	C2H2
Solyc10g049870	Zinc finger protein	C2H2		[86]			1.041	0.7145	0.497	0.7195		0.974667	0.404	0.925667	0.876
Solyc10g077110	transcription factor IIIA	C2H2			AT1G72050	TFIIIA	52.583	65.2675	43.8625	46.7745		25.7183	35.8107	37.1067	40.8223
Solyc10g078970	Zinc finger protein 6	C2H2
Solyc10g078990	Zinc finger protein 6	C2H2
Solyc10g080200	Zinc finger AN1 and C2H2 domain-containing stress-associated protein 16	C2H2			AT2G41835/AT3G57480	SAP13	3.5635	7.1365	5.1995	4.655		7.92333	4.97767	5.92033	6.34833
Solyc10g080600	Zinc finger protein 6	C2H2		[86]	AT3G58070	GIS	0.349	0.873	0.729	1.1105		0.0536667	0.474667	0.397667	2.01067
Solyc10g084180	Protein indeterminate-domain 2	C2H2			AT5G03150	JKD	13.4245	16.238	10.36	6.652		57.8237	10.742	16.797	14.0867
Solyc10g084910	Transcriptional regulator TAC1	C2H2
Solyc10g085560	Histone deacetylase HDT1	C2H2					55.2885	43.362	47.049	62.2645		42.6073	64.298	59.5687	57.9243
Solyc11g011890	Zinc finger protein 1	C2H2		[86]			1.446	0.3655	0.0395	0.019		1.23467	1.62167	3.397	3.436
Solyc11g017140	Zinc finger protein	C2H2			AT1G34370	AtSTOP1-STOP1	72.6555	50.942	40.6365	43.9		52.8007	40.082	53.7417	66.888
Solyc11g062060	Zinc finger protein	C2H2			AT3G57670	WIP2-NTT	0.3335	0.685	0.387	0.446		0.388667	0.387667	0.436333	0.511333
Solyc11g066400	Zinc finger protein	C2H2			AT2G28200		7.5665	9.7075	2.219	2.924		1.975	1.61967	2.16867	4.79367
Solyc11g066420	Zinc finger protein STAR3	C2H2			AT5G22890	STOP2	1.796	0.5925	1.288	1.673		0.348333	1.36933	1.84433	6.101
Solyc11g069240	Protein indeterminate-domain 2	C2H2			AT3G45260	BIB	1.597	8.967	0.5025	1.4865		4.449	6.60933	19.684	15.131
Solyc11g072210	Zinc finger protein	C2H2			AT5G56200
Solyc11g073060	Zinc finger, C2H2	C2H2					0.691	1.6645	0.135	0.011		11.2407	3.30533	0.210667	0.195333
Solyc11g073075	Zinc finger protein	C2H2					4.9425	2.173	0.2525	0.2715		215.86	1.90267	0.696	0.531667
Solyc11g150100	Zinc finger	C2H2			AT4G12240		12.0895	11.3855	10.9205	9.9105		8.39933	9.45033	10.4333	11.428
Solyc12g088390	Zinc-finger protein	C2H2					19.3085	10.011	1.3595	1.2055		47.036	2.308	0.739333	2.044
Solyc00g007330	Zinc finger transcription factor 1	C3H	C3H1	[96]
Solyc00g007450	Zinc finger transcription factor 2	C3H	C3H2	[96]
Solyc00g012540	Zinc finger transcription factor 3	C3H	C3H3	[96]
Solyc00g198360	Zinc finger transcription factor 4	C3H	C3H4	[96]
Solyc01g008170	Zinc finger transcription factor 5	C3H	C3H5	[96]	AT2G02160	C3H17	41.1325	38.92	40.43	45.349		26.7117	45.1873	44.2687	47.2253
Solyc01g008600	Zinc finger transcription factor 6	C3H	C3H52/C3H6	[96]	AT3G51950		14.2825	14.8855	8.6395	18.4325		14.0363	16.407	19.925	23.361
Solyc01g014850	Zinc finger transcription factor 7	C3H	C3H7	[96]			45.005	41.1335	21.4575	28.45		31.3457	38.6867	33.0603	29.425
Solyc01g067550	Zinc finger transcription factor 8	C3H	C3H8	[96]	AT3G06410/AT5G18550		39.625	64.458	56.6	43.9205		45.5113	62.826	52.532	47.1073
Solyc01g073940	Zinc finger transcription factor 9	C3H	C3H9	[96]			7.4475	10.2145	11.477	11.555		9.619	13.4513	17.3027	13.9853
Solyc01g087030	Zinc finger transcription factor 10	C3H	C3H10	[96]	AT3G08505		49.7305	38.8615	30.7315	37.6485		29.0577	20.431	21.5223	39.3673
Solyc01g087170	Zinc finger transcription factor 11	C3H	C3H11	[96]	AT2G41900	DEG9-OXS2-TZF7-	18.7195	19.711	43.1115	34.508		23.5833	23.3513	31.929	36.47
Solyc01g088100	Zinc finger transcription factor 12	C3H		[96]			167.519	204.026	220.162	150.454		227.409	198.729	194.656	187.66
Solyc01g100990	Zinc finger transcription factor 13	C3H	C3H13	[96]	AT5G26749		15.6355	14.6575	10.9755	13.1705		8.23333	10.7977	10.435	10.0333
Solyc01g103090	Zinc finger transcription factor 14	C3H	C3H14	[96]	AT1G10320		30.9185	27.115	23.24	23.086		21.907	23.4297	22.699	27.735
Solyc01g110490	Zinc finger transcription factor 15	C3H	C3H15		AT4G38890		35.524	30.965	29.2085	36.607		33.6657	38.4127	34.7977	41.0677
Solyc02g084200	Zinc finger transcription factor 19	C3H	C3H19	[96]			0.108	1.4035	0.628	0.2215		0.858333	2.175	1.046	0.91
Solyc02g084520	Zinc finger transcription factor 20	C3H	C3H20	[96]			36.526	32.0365	34.413	34.562		36.0623	25.0827	31.6933	33.7637
Solyc02g086430	Zinc finger transcription factor 21	C3H	C3H21	[96]			0.741	3.002	0.0395	0.3545		8.85733	2.28767	6.903	9.331
Solyc02g086510	Zinc finger transcription factor 22	C3H	C3H22	[96]			31.744	28.0615	27.389	28.18		28.388	33.6907	30.906	34.5787
Solyc03g006350	Zinc finger transcription factor 23	C3H	C3H23	[96]	AT2G33835	FES1	27.229	18.496	18.7005	17.4735		14.8723	14.8003	15.7603	21.675
Solyc03g026350	Zinc finger transcription factor 24	C3H	C3H24	[96]	AT4G25440/AT5G51980	ZFWD1	36.831	40.9105	42.16	46.088		33.2833	55.86	47.0727	49.9977
Solyc03g063200	Zinc finger transcription factor 25	C3H	C3H25	[96]	AT3G12130	KHZ1	22.571	32.1735	15.3645	20.5315		22.2533	21.239	17.3893	18.5887
Solyc03g063680	Zinc finger transcription factor 26	C3H	C3H26	[96]			9.29	3.498	4.346	4.6705		6.84867	3.80167	5.56267	5.45733
Solyc03g111580	Zinc finger transcription factor 27	C3H	C3H27	[96]	AT3G48440		75.2365	81.4995	93.848	84.9005		66.7377	105.966	100.215	95.9457
Solyc03g116410	Zinc finger transcription factor 28	C3H	C3H28	[96]
Solyc03g116420	Zinc finger transcription factor 29	C3H	C3H29	[96]
Solyc03g119430	Zinc finger transcription factor 30	C3H	C3H30	[96]	AT3G47120	GDS1	24.3435	20.9485	18.672	22.198		16.5077	20.6533	22.6103	26.755
Solyc04g008550	Zinc finger transcription factor 31	C3H	C3H31	[96]	AT2G02160	AtC3H17-C3H17	51.7525	38.81	43.431	44.165		29.1953	48.4023	45.26	43.7103
Solyc04g017710	Zinc finger transcription factor 32	C3H	C3H32	[96]	AT1G07360/AT2G29580	MAC5A/MAC5B	99.88	88.0115	62.528	73.644		72.6217	76.923	72.228	90.228
Solyc04g057990	Zinc finger transcription factor 33	C3H	C3H33	[96]	AT1G21580	SOP1	24.0615	28.088	35.4045	32.652		20.266	35.3683	32.9483	41.8053
Solyc04g064770	Zinc finger transcription factor 34	C3H	C3H34	[96]			77.9945	84.7645	82.6525	84.6055		73.7973	91.5893	93.1583	86.6187
Solyc04g064800	Zinc finger transcription factor 35	C3H	C3H35	[96]	AT3G18640		39.643	39.531	33.615	37.15		36.6353	42.0253	39.7013	38.303
Solyc05g008670	Zinc finger transcription factor 36	C3H	C3H36	[96]	AT1G68200	AtC3H15-CDM1	0.6695	3.178	0.16	0.152		16.6523	3.06767	10.905	16.159
Solyc05g009350	Zinc finger transcription factor 37	C3H	C3H37	[96]	AT5G56930	EMB1789	18.217	17.2205	16.244	19.3275		17.272	13.088	16.0553	27.3663
Solyc05g032650	Zinc finger transcription factor 38	C3H	C3H38	[96]
Solyc05g052570	Zinc finger transcription factor 39	C3H	C3H39	[96]			56.559	30.741	35.5235	36.239		685.278	44.554	33.7673	40.0683
Solyc06g008740	Zinc finger transcription factor 40	C3H	C3H40	[96]	AT2G47850		18.614	21.6425	24.163	25.96		18.9747	17.8567	23.4937	22.765
Solyc06g054600	Zinc finger transcription factor 42	C3H	C3H42	[96]			6.2715	17.6825	6.3305	5.928		1.927	5.33233	17.953	17.1283
Solyc06g054620	Zinc finger transcription factor 43	C3H	C3H43	[96]			2.3935	9.441	7.7795	4.3495		2.01467	3.9	28.518	18.8163
Solyc06g063020	Zinc finger transcription factor 44	C3H	C3H44	[96]			17.871	12.493	12.588	17.5815		14.1157	9.78433	19.33	15.0163
Solyc06g069440	Zinc finger transcription factor 45	C3H	C3H45				72.0175	73.7205	77.5605	70.6755		72.6123	75.4413	77.2667	82.6973
Solyc06g071860	Zinc finger transcription factor 46	C3H	C3H46	[96]			42.7545	46.0535	50.8225	55.387		31.3393	62.285	60.2037	76.355
Solyc06g072720	Zinc finger transcription factor 47	C3H	C3H47	[96]	AT1G32360		40.4675	25.281	19.4585	25.657		22.9613	30.3563	28.1847	30.5123
Solyc06g082010	Zinc finger transcription factor 48	C3H	C3H48	[96]	AT5G58620	TZF9	94.6575	95.0965	91.494	110.13		111.851	89.513	78.632	146.7
Solyc07g047940	Zinc finger transcription factor 49	C3H	C3H49	[96]	AT2G05160		27.2035	16.358	12.9845	13.684		25.5163	3.045	3.36367	6.69933
Solyc07g053750	Zinc finger transcription factor 50	C3H	C3H50	[96]	AT1G03790	TZF4-SOM-AtTZF4-	0.1325	0.1505	0.1555	0.429		0.571	0.243	0.184667	1.91333
Solyc07g065290	Zinc finger transcription factor 51	C3H	C3H51	[96]			2.8215	6.015	5.0335	2.8875		5.77333	3.38067	6.24333	6.932
Solyc08g068820	Zinc finger CCCH domain-containing protein 22	C3H	C3H56	[96]	AT2G24830		21.029	15.653	15.647	17.985		18.699	17.8483	17.9167	19.018
Solyc09g007230	Zinc finger transcription factor 53	C3H	C3H53	[96]	AT2G20280		85.296	78.6875	69.0595	77.858		69.74	115.7	92.994	89.424
Solyc09g074640	Zinc finger transcription factor 54	C3H	C3H54	[96]	AT2G47850		38.312	52.664	56.9875	61.941		38.569	38.4797	45.259	55.694
Solyc10g038000	Zinc finger transcription factor 57	C3H	C3H57	[96]	AT3G08505		38.152	26.3285	22.7785	26.3655		20.37	24.6	24.067	32.55
Solyc10g047040	Zinc finger transcription factor 58	C3H	C3H58	[96]			0.3625	6.1715	2.527	3.185		3.55833	3.42233	5.432	6.556
Solyc10g078750	Zinc finger transcription factor 59	C3H	C3H59	[96]	AT3G12130/AT5G06770	KHZ1/KHZ2	29.313	22.731	15.501	25.277		12.9273	26.172	23.0087	23.8567
Solyc10g079120	Zinc finger transcription factor 60	C3H	C3H60	[96]			31.3545	31.742	32.852	31.8005		27.2507	30.8433	33.4377	38.1237
Solyc10g079190	Zinc finger transcription factor 61	C3H	C3H61	[96]	AT1G07360/AT2G29580	MAC5A/MAC5B	83.213	47.8255	35.736	38.558		49.5767	27.0023	37.9177	51.2157
Solyc10g080260	Zinc finger transcription factor 62	C3H	C3H62	[96]			19.3005	22.941	18.39	23.9165		18.2643	10.5193	13.2573	16.225
Solyc10g080480	Zinc finger transcription factor 63	C3H	C3H63	[96]	AT3G12130	KHZ1	15.9155	25.8755	10.331	20.6745		15.5297	27.5783	20.7653	16.2153
Solyc11g008900	Zinc finger transcription factor 65	C3H	C3H65	[96]	AT3G02830	ZFN1-PNT1	46.1735	68.2305	71.2925	59.995		59.4737	45.2793	50.0997	60.193
Solyc11g065320	Zinc finger transcription factor 67	C3H	C3H67	[96]	AT5G12440		66.788	87.741	83.995	69.3545		73.209	49.8	65.323	62.855
Solyc11g066830	Zinc finger transcription factor 68	C3H	C3H68	[96]	AT1G27650	ATU2AF35A	107.99	20.497	76.7465	64.707		91.3253	40.3723	59.1937	67.426
Solyc11g069340	Zinc finger transcription factor 69	C3H	C3H69	[96]	AT2G28450	TRM2b	65.8125	58.774	54.8795	53.481		57.2263	70.2973	69.002	78.5037
Solyc11g070070	Zinc finger transcription factor 70	C3H	C3H70	[96]	AT3G19360		3.8605	11.6515	2.822	2.296		5.56667	9.103	5.20867	3.76833
Solyc12g005770	Zinc finger transcription factor 71	C3H	C3H71	[96]	AT3G21810		27.959	21.6035	25.542	31.582		21.669	34.6687	25.4273	28.5523
Solyc12g006620	Zinc finger transcription factor 72	C3H	C3H72	[96]			2.2565	1.409	1.452	2.0945		1.28133	1.084	1.812	1.345
Solyc12g008660	Zinc finger transcription factor 73	C3H	C3H73	[96]	AT2G19810	AtOZF1-TZF2-AtTZF2-OZF1	36.772	11.2775	13.6525	42.724		5.64767	21.654	37.1423	66.5133
Solyc12g008870	Zinc finger transcription factor 74	C3H	C3H74	[96]	AT5G56900		17.289	19.619	19.193	20.808		16.0793	26.2267	25.7267	25.507
Solyc12g009390	Zinc finger transcription factor 75	C3H	C3H75	[96]	AT1G75340		4.9515	12.4475	7.523	9.5855		10.352	12.6887	8.614	9.07267
Solyc12g017410	Zinc finger transcription factor 76	C3H	C3H76	[96]	AT3G12680	HUA1	39.341	35.085	28.6115	31.919		30.723	35.9653	32.4423	31.4853
Solyc12g035250	Zinc finger transcription factor 77	C3H	C3H77	[96]	AT3G27700		22.407	20.877	22.167	24.302		20.9733	28.0857	23.44	26.0187
Solyc12g040230	Zinc finger transcription factor 78	C3H	C3H78	[96]
Solyc12g040300	Zinc finger transcription factor 79	C3H	C3H79	[96]
Solyc12g089260	Zinc finger transcription factor 80	C3H	C3H80	[96]	AT1G19860		9.1085	18.507	10.379	12.2645		11.092	14.289	12.082	10.4517
Solyc01g057270	Calmodulin-binding transcription factor SR4	CAMTA	CAMTA2				0.9475	4.4185	4.3615	7.242		1.77567	5.49133	3.68567	3.93667
Solyc01g060170	Calmodulin-binding transcription activator	CAMTA	CAMTA6L				3.7115	4.47	9.3025	6.098		15.3817	8.659	8.947	11.172
Solyc01g105230	Calmodulin-binding transcription activator 2	CAMTA	CAMTA2L		AT5G64220	CAMTA2	45.504	51.6175	53.09	46.9395		70.9343	62.2473	61.373	61.8143
Solyc04g056270	ER66	CAMTA	CAMTA3		AT2G22300	SR1-CAMTA3	110.645	76.469	106.415	98.2835		151.654	102.37	102.223	137.758
Solyc05g015650	Calmodulin-binding transcription activator 4	CAMTA	CAMTA4a		AT1G67310		47.3165	37.1915	51.26	38.2005		42.7627	36.4937	49.831	57.5283
Solyc12g035520	Calmodulin-binding transcription activator 4	CAMTA	CAMTA4b		AT1G67310		28.9165	46.7035	54.862	52.207		35.0653	37.8173	46.1783	57.1333
Solyc12g099340	Calmodulin-binding transcription activator	CAMTA	CAMTA5/6		AT3G16940/AT4G16150	CAMTA6/CAMTA5	10.304	18.1255	18.4	13.3385		9.48133	26.8727	15.5933	19.9557
Solyc02g079430	Zinc finger protein CONSTANS-LIKE 13	CO-like			AT4G27310/AT5G54470	BBX28/BBX29	30.079	18.5055	21.212	14.784		5.95033	22.8497	18.1027	16.3947
Solyc02g089520/Solyc02g089540	CONSTANS 1	CO-like			AT3G02380/AT5G15850	BBX3/BBX2	17.0155	22.7695	22.246	26.6985		48.2097	13.5257	10.949	10.567
Solyc02g093590	zinc finger protein CONSTANS-LIKE 16-like	CO-like			AT5G14370		61.7125	43.053	26.2745	28.1805		9.45433	23.042	36.6837	29.4207
Solyc03g119540	Zinc finger protein	CO-like					45.992	41.3565	35.963	39.718		19.232	13.365	24.9677	26.3517
Solyc04g007210	Zinc finger protein CONSTANS-LIKE 7	CO-like			AT1G25440/AT1G68520	COL16-BBX15/BBX14	21.675	36.1975	37.3765	48.407		4.73233	8.17	9.43467	13.259
Solyc05g009310	Zinc finger protein CONSTANS-LIKE 7	CO-like			AT1G25440	COL16-BBX15	26.887	17.868	15.0395	51.964		0.044	19.08	17.0073	18.938
Solyc05g020020	Zinc finger protein CONSTANS-LIKE 9	CO-like			AT3G07650/AT5G48250	COL9-BBX7/BBX8	52.6805	43.7045	41.017	43.8335		31.0873	30.921	38.3243	46.188
Solyc05g024010	Zinc finger protein CONSTANS-LIKE 15	CO-like			AT1G28050/AT2G33500	BBX13/BBX12	33.888	16.4695	16.902	24.379		8.32733	23.354	27.281	28.093
Solyc05g046040	zinc finger protein CONSTANS-LIKE 12-like	CO-like			AT3G21880	BBX10-COL12
Solyc07g006630	Zinc finger protein CONSTANS-like 5-like	CO-like			AT5G57660	ATCOL5-COL5-BBX6-	6.4305	0.094	3.169	3.8745		13.7497	6.11767	3.43	5.41733
Solyc07g008540	Zinc finger protein CONSTANS-LIKE 2	CO-like			AT5G57180	CIA2	14.5785	42.6675	7.459	13.62		3.67433	21.3577	11.631	7.087
Solyc07g045180	Zinc finger protein CONSTANS-LIKE 9	CO-like					32.3705	37.3535	22.8335	22.1955		8.13033	21.073	22.1543	23.0137
Solyc07g066510	Zinc finger protein CONSTANS-LIKE 3	CO-like			AT3G12890	ASML2	15.286	13.325	2.2625	2.611		2.48267	0.699333	0.171667	0.385667
Solyc08g006530	Zinc finger protein CONSTANS-LIKE 4	CO-like					110.38	44.5225	80.917	83.769		36.8357	50.978	53.0687	55.705
Solyc08g081350	Zinc finger protein CONSTANS-LIKE 3	CO-like			AT1G63820/AT5G41380		0.0475	0.413	0.0935	0.2035		0.671333	3.551	1.98	3.08967
Solyc09g074560	Zinc finger protein CONSTANS-LIKE 15	CO-like			AT2G47890	BBX11	23.921	51.07	81.277	56.6895		5.67033	76.4797	45.3737	47.719
Solyc09g090650	CCT motif family protein	CO-like			AT1G04500
Solyc12g006240	Zinc finger protein CONSTANS-LIKE 9	CO-like			AT3G07650/AT5G48250	COL9-BBX7/BBX8	45.1095	13.8685	19.508	36.0445		1.258	32.2823	40.7303	56.636
Solyc12g096500	Zinc finger protein CONSTANS-LIKE 4	CO-like			AT5G24930	COL4-ATCOL4-BBX5-	243.902	117.775	148.25	187.296		111	140.445	71.981	100.897
Solyc01g096120	Dof zinc finger protein1	Dof	DOF-20		AT3G61850	DAG1	14.635	3.9495	2.466	2.5145		16.4407	6.756	7.75567	13.658
Solyc02g065290	Dof zinc finger protein2	Dof	DOF-33				0.435	1.125	0.5005	0.6685		0.42	0.662	0.654333	0.547333
Solyc02g067230	Dof zinc finger protein3	Dof	DOF-27		AT5G39660	CDF2	6.3295	27.495	5.3725	5.427		16.431	5.59833	5.07967	6.31267
Solyc02g076850	Dof zinc finger protein4	Dof	DOF-30		AT1G29160/AT2G34140	COG1/CDF4	7.681	5.326	1.386	3.762		1.643	1.43867	2.086	3.45
Solyc02g077950	Dof zinc finger protein5	Dof	DOF-12		AT1G28310		14.681	41.0255	31.8135	16.0325		14.5957	21.0263	13.8753	17.8857
Solyc02g077960	Dof zinc finger protein PBF	Dof	DOF-13				5.9585	4.6475	1.3025	2.7105		2.189	2.47067	2.765	4.18967
Solyc02g078620	Dof zinc finger protein DOF5.3	Dof	DOF-31				14.696	3.2075	0.634	1.0075		25.9397	0.303667	0.724	0.555333
Solyc02g088070	Dof zinc finger protein	Dof	DOF-28				18.2365	4.7805	7.3605	11.73		8.088	8.87	10.6827	12.1607
Solyc02g090220	Dof zinc finger protein PBF	Dof	DOF-34		AT3G50410	OBP1-DOF3.4	5.4285	4.571	2.8635	7.7875		15.448	4.289	9.305	9.01867
Solyc02g090310	Dof zinc finger protein	Dof	DOF-10		AT3G21270	DOF2-ADOF2	13.412	28.4095	10.7545	13.129		19.4323	31.744	22.034	20.7917
Solyc03g082840	Dof zinc finger protein	Dof	DOF-23				8.259	5.5525	3.924	4.2535		8.79767	11.708	8.735	11.2133
Solyc03g112930	Dof zinc finger protein	Dof	DOF-18		AT5G62940	DOF5.6-HCA2	10.34	4.6125	4.1365	7.899		8.15133	2.94567	4.99133	8.34333
Solyc03g115940	Dof zinc finger protein	Dof	DOF-25		AT3G47500	CDF3	63.4225	11.1055	71.3735	85.8665		27.0033	85.1947	66.0777	82.3687
Solyc03g121400	Dof zinc finger protein14	Dof	DOF-2		AT3G21270	DOF2-ADOF2	9.1385	12.4425	9.3085	8.455		77.257	9.12	6.308	7.427
Solyc04g070960	Dof zinc finger protein DOF1.2	Dof	DOF-19		AT3G52440
Solyc04g079570	Dof zinc finger protein	Dof	DOF-32				4.802	3.813	1.5025	2.687		3.40333	5.72933	5.83967	6.492
Solyc05g007880	cyclic dof factor 2-like	Dof	DOF-29				31.821	55.904	21.226	20.5515		41.523	10.6677	7.44133	19.4283
Solyc05g054510	Dof zinc finger protein	Dof	DOF-4
Solyc06g005130	Dof zinc finger protein	Dof	DOF-16		AT2G28510	DOF2.1	3.737	18.683	9.1875	9.854		2.88833	5.052	6.56867	8.60067
Solyc06g062520	Dof zinc finger protein	Dof	DOF-3		AT1G51700	DOF1-ADOF1	6.593	5.6445	2.668	4.5335		11.5813	9.53867	4.79567	6.402
Solyc06g069760	Dof zinc finger protein	Dof	DOF-26				23.9875	3.002	18.133	19.9625		13.6923	9.73067	11.888	22.3323
Solyc06g071480	Dof zinc finger protein PBF	Dof	DOF-17		AT5G62940	DOF5.6-HCA2	12.1715	8.4415	4.808	11.669		4.841	8.12233	7.691	10.3653
Solyc06g075370	Dof zinc finger protein	Dof	DOF-14		AT5G60200	TMO6-DOF5.3	31.5655	49.1795	22.5525	34.0335		88.3047	28.4447	33.5793	38.2773
Solyc06g076030	Dof zinc finger protein DOF2.2	Dof	DOF-7		AT3G55370/AT5G02460	OBP3/PEAR2	21.5815	16.326	6.362	7.671		25.7163	14.286	10.3633	10.515
Solyc06g150130	Dof zinc finger protein PBF	Dof	DOF-1		AT5G60850	AtDOF5.4-OBP4	23.7785	10.6775	11.004	24.303		19.626	37.721	39.852	37.502
Solyc08g008495	Zn finger protein	Dof	DOF-24				7.733	2.3585	0.268	0.212		2.68067	0.77	0.692333	0.677
Solyc08g082910	Dof zinc finger protein	Dof	DOF-22		AT4G24060	VDOF1-Dof4.6	19.7135	31.117	10.053	10.833		15.1733	10.9683	6.46333	14.433
Solyc09g010680	Dof zinc finger protein DOF3.6	Dof	DOF-9		AT5G02460	PEAR2	25.64	24.459	22.382	23.766		12.8137	20.1943	12.175	16.9713
Solyc10g009360	Dof zinc finger protein	Dof	DOF-21		AT2G46590	DAG2	3.603	3.6015	0.304	0.354		6.52667	2.94867	2.516	3.83833
Solyc10g086440	Dof zinc finger protein DOF3.6	Dof	DOF-8		AT2G37590	ATDOF2.4-DOF2.4-PEAR1-	4.8875	2.916	1.9865	2.863		1.25067	1.623	1.26767	1.65433
Solyc11g010940	Dof zinc finger protein	Dof	DOF-11		AT5G65590	SCAP1
Solyc11g066050	Dof zinc finger protein DOF2.4	Dof	DOF-5		AT5G02460	PEAR2	16.1685	11.793	4.3895	6.864		8.53467	5.435	4.40833	6.73967
Solyc11g072500	Dof zinc finger protein	Dof	DOF-15		AT5G60200	TMO6-DOF5.3	9.215	14.863	23.488	32.8175		10.4387	16.3003	13.0627	19.3693
Solyc01g007760	Transcription factor E2FA	E2F/DP	E2F3		AT2G36010	E2F3	24.3335	26.4895	23.614	26.387		22.0473	24.7807	31.2587	27.6137
Solyc02g087310	E2F transcription factor-like E2FE	E2F/DP	E2FFL				6.5185	14.52	10.174	12.24		13.3303	15.6723	12.5123	11.6537
Solyc03g113760	E2F transcription factor-like E2FE	E2F/DP	E2FE		AT3G48160	DEL1-E2FE-E2L3-	3.0705	4.535	4.2375	7.907		7.29	6.00433	17.2337	9.59333
Solyc04g081350	Transcription factor E2FC	E2F/DP	E2FC		AT1G47870	E2FC-ATE2F2-ATE2FC-	2.283	7.882	4.129	4.0935		7.32667	5.373	7.13633	4.43033
Solyc06g074010	Transcription factor E2FB	E2F/DP	E2FBa		AT5G22220	ATE2FB-E2FB-E2F1-	11.8945	9.71	8.1485	8.2395		10.4363	7.12667	9.355	9.294
Solyc09g010670	Transcription factor DP	E2F/DP	DPA		AT5G02470	DPA	3.776	7.799	8.95	10.4645		4.879	9.16533	9.53833	10.9427
Solyc10g078430	Transcription factor-like protein DPB	E2F/DP	DPB		AT5G03415	DPB-ATDPB	15.1575	16.19	10.673	12.535		15.4843	13.8247	13.7443	15.8133
Solyc11g068800	Transcription factor E2FB	E2F/DP	E2FBb		AT5G22220	ATE2FB-E2FB-E2F1-	9.4135	12.282	9.996	10.414		9.45067	8.54033	8.42333	8.48233
Solyc01g006650	ETHYLENE INSENSITIVE 3-like 3 protein	EIL	EIL1		AT1G73730	EIL3	3.056	2.9495	2.898	1.919		2.93767	24.08	3.392	4.12333
Solyc01g009170	EIL-EIN3/EIL	EIL	EIL2		AT3G20770	EIN3	289.26	115.755	160.796	187.923		139.437	185.581	163.319	231.898
Solyc01g014480	ETHYLENE INSENSITIVE 3-like 3 protein	EIL	EIL3		AT1G73730	EIL3	27.6545	18.908	22.935	19.3445		15.6903	27.445	23.43	29.8137
Solyc01g096810	EIL3	EIL	EIL4				222.147	72.0505	98.7905	116.96		132.973	100.784	88.4217	160.569
Solyc03g096630	Ethylene insensitive 3 protein	EIL	EIL5		AT5G10120/AT5G65100	EIL4
Solyc04g054840	Ethylene insensitive 3-like protein	EIL	EIL6		AT5G10120/AT5G65100	EIL4	0	0	0	0.022		0.632333	1.80767	4.98067	2.54167
Solyc05g051875	Ethylene insensitive 3-like protein	EIL	EIL7		AT5G10120	EIL4
Solyc06g073720	EIL1	EIL	EIL8		AT3G20770	AtEIN3-EIN3	134.905	89.669	116.499	106.382		102.527	118.755	97.6153	105.466
Solyc06g073730	LeEIL4EIN3-like	EIL	EIL9		AT2G27050/AT3G20770	AtEIL1-EIL1/AtEIN3-EIN3	131.661	122.43	150.627	119.328		54.9573	79.62	56.5743	73.046
Solyc01g005630	Ethylene-responsive transcription factor	ERF	ERF-1	[97]	AT5G19790	RAP2.11	0	0.0095	0	0		0	0	0.597333	0.606667
Solyc01g008880	Solanum lycopersicum Cytokinin Response Factor 8	ERF	ERF-2	[97]
Solyc01g009440	Dehydration-responsive element-binding protein 1B	ERF	ERF-3	[97]
Solyc01g014720	Solanum lycopersicum Cytokinin Response Factor 7	ERF	ERF-4	[97]
Solyc01g057080	Ethylene-responsive transcription factor	ERF	ERF-5	[97]	AT1G22810/AT1G71520	ERF019
Solyc01g065980	Ethylene Response Factor E.4	ERF	ERF-6	[97]	AT3G16770	ERF72-ATEBP-EBP-RAP2.3	26.54	33.0515	84.1635	70.705		13.6607	37.8053	39.2747	81.3467
Solyc01g067540	Ethylene-responsive transcription factor	ERF	ERF-7	[97]	AT5G18560	PUCHI	0.055	0.0095	0.0805	0.029		0.828333	17.8313	7.132	4.03067
Solyc01g090300	Ethylene-responsive transcription factor 2	ERF	ERF-8	[97]			0.342	0.038	0	0		8.69767	0.0126667	0.024	0
Solyc01g090310	Ethylene-responsive transcription factor 13	ERF	ERF-9	[97]			0.091	0.0095	0	0		13.8447	0.0183333	0	0
Solyc01g090320	Unknown protein	ERF	ERF				0	0.0095	0	0		1.044	0.0126667	0	0.0106667
Solyc01g090340	Ethylene-responsive transcription factor 2	ERF	ERF-10	[97]			1.3735	77.8255	93.698	31.6145		8.95933	44.2693	55.668	13.993
Solyc01g090345	Ethylene-responsive transcription factor 2	ERF	ERF-11
Solyc01g090370	Ethylene-responsive transcription factor 13	ERF	ERF-12	[97]
Solyc01g090560	Ethylene-responsive transcription factor	ERF	ERF-13	[97]	AT2G44940/AT3G60490	ERF34/ERF35-ERF035	2.277	10.1675	6.5235	3.1995		16.112	2.06067	6.45533	6.041
Solyc01g091760	Ethylene-responsive transcription factor 1	ERF	ERF-14	[97]			0.038	2.7255	2.537	0.6105		0.0316667	1.848	0.532	0.147
Solyc01g095500	Sl Cytokinin Response Factor 5	ERF	ERF-15	[97]	AT3G61630	CRF6	1.6395	12.1135	6.4195	5.179		9.734	1.374	2.837	3.39667
Solyc01g108240	Ethylene Response Factor D.3	ERF	ERF-16	[97]			7.8835	0.2165	0	0.011		438.533	0.369333	0.0356667	0.044
Solyc02g067020	Ethylene-responsive transcription factor	ERF	ERF-17	[97]
Solyc02g077360	Ethylene Response Factor B.2	ERF	ERF-18	[97]	AT4G18450		0	1.1825	0.5405	0.2885		0.435	1.54033	1.242	0.629333
Solyc02g077370	Ethylene Response Factor C.5	ERF	ERF-19	[97]			0.4045	2.1515	1.0855	0.222		14.0053	4.591	1.35733	4.621
Solyc02g077810	Ethylene-responsive transcription factor 4	ERF	ERF-20	[97]
Solyc02g090770	Ethylene-responsive transcription factor	ERF	ERF-21	[97]			0.615	0.047	0	0		19.9157	0.136667	0	0.0166667
Solyc02g090790	Ethylene-responsive transcription factor	ERF	ERF-22	[97]
Solyc02g090800	Ethylene-responsive transcription factor	ERF	ERF-23	[97]			0	0.0095	0	0		2.82633	0.00333333	0	0
Solyc02g093130	Ethylene-responsive transcription factor RAP2-10	ERF	ERF-24	[97]			44.7715	15.0585	12.466	17.0615		22.336	14.3613	16.2337	18.037
Solyc03g005500	Ethylene-responsive transcription factor	ERF	ERF-25	[97]
Solyc03g005510	Ethylene-responsive transcription factor	ERF	ERF-26	[97]	AT3G23230	AtTDR1-ERF98-AtERF98-TDR1	0.636	0.7855	0.016	0.048		0.861	0	0	0.0276667
Solyc03g005520	Ethylene-responsive transcription factor 1B	ERF	ERF-27	[97]	AT3G23240	ERF1B-AtERF-ERF1-
Solyc03g006320	Ethylene-responsive transcription factor 4	ERF	ERF-28	[97]			1.2905	0.694	0.557	1.25		1.538	0.810333	0.551	1.09333
Solyc03g007460	Solanum lycopersicum Cytokinin Response Factor 4	ERF	ERF-29	[97]			1.359	2.9565	1.8115	1.523		13.3997	5.551	4.70467	3.87967
Solyc03g026270	CRT binding factor 3	ERF	ERF-30	[97]	AT4G25470/AT4G25480/AT4G25490	DREB1C-CBF2-ATCBF2-FTQ4/CBF3-DREB1A-ATCBF3/CBF1-DREB1B-ATCBF1	14.415	0.0515	0.0465	0.093		136.04	0.173	0.0356667	0.107333
Solyc03g026280	C-repeat binding factor 1	ERF	ERF-31	[97]	AT4G25480/AT4G25490	CBF3-DREB1A-ATCBF3/CBF1-DREB1B-ATCBF1	24.518	7.9635	0.4585	0.709		288.179	1.03333	0.591333	0.512667
Solyc03g093540	Ethylene-responsive transcription factor 5	ERF	ERF-32	[97]	AT5G51190	ERF105	10.0225	4.242	2.0465	7.88		65.827	1.74767	1.09167	3.386
Solyc03g093550	Ethylene-responsive transcription factor 5	ERF	ERF-33	[97]	AT5G51190	ERF105	27.3765	17.9245	3.4395	6.297		108.697	3.73733	2.172	3.90133
Solyc03g093560	ethylene response factor C.6	ERF	ERF-34	[97]	AT5G51190	ERF105	32.334	24.46	9.534	15.7495		115.713	10.6587	7.11033	13.833
Solyc03g093610	ethylene response factor A.2	ERF	ERF-35	[97]	AT4G17500	ERF1A-ERF100-ERF-1	34.1345	51.139	20.4155	19.46		232.171	21.721	12.7197	10.3667
Solyc03g095973	Ethylene-responsive transcription factor ABI4	ERF	ERF-36	[97]	AT2G40220	SAN5-ISI3-SUN6-ABI4
Solyc03g095977	Ethylene-responsive transcription factor ABI4	ERF	ERF-37	[97]	AT2G40220	SAN5-ISI3-SUN6-ABI4
Solyc03g114440	Ethylene-responsive transcription factor	ERF	ERF-38	[97]			0.4735	0.522	0.9665	0.465		0.294333	1.152	1.94067	1.69167
Solyc03g116610	Ethylene-responsive transcription factor WIN1	ERF	ERF-39	[97]	AT1G15360	SHN1-WIN1-AtSHN1-
Solyc03g117130	Ethylene-responsive transcription factor	ERF	ERF-40	[97]			0	2.915	1.4255	3.551		0.0126667	1.067	1.11667	0.480667
Solyc03g117230	Ethylene-responsive transcription factor	ERF	ERF-41	[97]	AT1G80580
Solyc03g118190	Ethylene-responsive transcription factor	ERF	ERF-42	[97]			1.3495	36.027	44.467	50.2345		1.025	9.692	11.3913	14.7557
Solyc03g119580	Solanum lycopersicum Cytokinin Response Factor 9	ERF	ERF-43	[97]			0.7475	0.962	0.9625	1.3195		4.99167	1.495	0.910667	1.52
Solyc03g119800	Ethylene-responsive transcription factor LEP	ERF	ERF-44	[97]
Solyc03g120840	Ethylene-responsive transcription factor TINY	ERF	ERF-45	[97]			5.7895	3.7285	3.8435	8.1965		4.93233	4.907	12.798	12.4463
Solyc03g123500	GCC box binding protein C.4	ERF	ERF-46	[97]	AT1G53910/AT3G14230	RAP2.12-ERF74/RAP2.2	109.368	137.065	175.19	152.998		101.353	199.6	169.34	171.95
Solyc03g124110	Dehydration-responsive element-binding transcription factor	ERF	ERF-47	[97]	AT5G51990	CBF4-DREB1D	9.775	0.248	0.008	0		222.898	0.0643333	0.0243333	0.0303333
Solyc04g007170	Ethylene-responsive transcription factor	ERF	ERF-48		AT1G68550/AT3G25890	CRF10/CRF11	61.4165	32.7975	14.542	25.4975		9.65767	15.5837	10.8893	20.308
Solyc04g012050	Ethylene-responsive transcription factor	ERF	ERF-49	[97]	AT5G64750	ABR1	0.673	9.067	1.0885	0.9825		7.26133	5.04033	1.08433	1.019
Solyc04g014530	Ethylene Response Factor C.2	ERF	ERF-50	[97]			0.527	3.479	4.6845	7.035		1.87433	2.747	6.19767	9.90167
Solyc04g050750	Ethylene-responsive transcription factor	ERF	ERF-51	[97]	AT1G75490/AT5G18450
Solyc04g051360	Ethylene Response Factor D.1	ERF	ERF-52	[97]	AT5G64750	ABR1	0	0.121	0	0		5.778	0.174	0.036	0.0106667
Solyc04g054910	Ethylene-responsive transcription factor	ERF	ERF-53	[97]			220.114	520.668	388.967	389.972		348.325	319.842	296.186	440.16
Solyc04g071770	Ethylene-responsive transcription factor	ERF	ERF-54	[97]	AT5G64750	ABR1	2.547	49.6505	8.95	8.681		3.827	27.8843	2.72067	4.09033
Solyc04g072300	Ethylene-responsive transcription factor	ERF	ERF-55	[97]	AT1G12890		0	0.0095	0	0		0.200333	0.845333	0.801667	1.863
Solyc04g072900	dehydration-responsive element binding protein 3	ERF	ERF-56	[97]	AT1G78080	AtWIND1-WIND1-RAP2.4-	89.726	107.317	55.988	68.356		206.867	71.4083	49.3273	79.1517
Solyc04g078640	Ethylene-responsive transcription factor RAP2-1	ERF	ERF-57	[97]	AT3G50260/AT5G67190	DEAR1-ATERF#011-CEJ1/DEAR2	18.705	28.9845	9.001	23.227		15.229	14.874	3.84633	14.3483
Solyc04g080910	Dehydration-responsive element-binding protein 2C	ERF	ERF-58	[97]	AT1G75490
Solyc05g009250	Ethylene-responsive transcription factor	ERF	ERF-59				2.3975	2.5165	2.0405	2.3845		1.492	1.97733	2.016	2.638
Solyc05g013540	LEAFLESS	ERF	ERF-60	[97]	AT1G12980/AT1G24590	ESR1-DRN/DRN-LIKE-DRNL-BOL-ESR2	1.0505	3.3895	1.327	3.421		4.53633	1.60333	1.642	1.13467
Solyc05g050790	Ethylene-responsive transcription factor 1	ERF	ERF-61	[97]
Solyc05g050830	Ethylene-responsive transcription factor	ERF	ERF-62	[97]
Solyc05g051180	Ethylene-responsive transcription factor 1B	ERF	ERF-63	[97]			4.009	6.261	2.835	1.156		1.732	2.93133	3.23767	2.221
Solyc05g051200	ethylene-responsive factor 1	ERF	ERF-64	[97]			10.7505	33.954	14.4385	12.5505		4.23467	6.054	4.91767	14.091
Solyc05g052030	ethylene response factor 4	ERF	ERF-65	[97]	AT5G07580	DEWAX2-ERF106	76.3695	38.312	19.045	35.2325		26.3483	23.251	15.636	34.3463
Solyc05g052040	ripening regulated protein DDTFR10/A	ERF	ERF-66	[97]			84.184	47.511	5.782	8.556		474.973	61.7107	15.1537	26.5433
Solyc05g052050	DNA-binding protein Pti4	ERF	ERF-67	[97]	AT4G17500	ERF1A-ERF100-ERF-1	54.648	14.1945	14.2165	24.8275		72.0807	37.7897	16.1117	24.112
Solyc05g052410	Dehydration-responsive element-binding protein 2A	ERF	ERF-68	[97]	AT2G40350		1.504	1.614	0.7865	1.214		3.371	3.301	1.71267	1.51267
Solyc06g035700	Ethylene-responsive transcription factor	ERF	ERF-69	[97]	AT5G52020		6.4805	0.2015	0.0525	0.101		275.762	0.047	0.113333	0.0876667
Solyc06g050520	dehydration responsive element binding protein 1	ERF	ERF-70	[97]	AT2G40340/AT5G05410	DREB2C-AtERF48/DREB2-DREB2A
Solyc06g051840	Solanum lycopersicum Cytokinin Response Factor 6	ERF	ERF-71	[97]	AT4G27950/AT5G53290	CRF4/CRF3	2.1675	3.3395	2.262	2.662		12.6567	9.83533	12.551	14.329
Solyc06g054630	Ethylene-responsive transcription factor	ERF	ERF-72	[97]	AT5G21960	ERF016	0	0.0185	0.0255	0.0435		5.24567	0.224667	0.003	0
Solyc06g063070	Ethylene Response Factor A.3	ERF	ERF-73	[97]	AT1G53910/AT3G14230	RAP2.12-ERF74/RAP2.2	637.157	234.407	331.87	348.652		379.55	330.579	373.412	334.649
Solyc06g065820	Ethylene Response Factor H.1	ERF	ERF-74	[97]	AT5G25190	ESE3	14.721	22.827	32.61	32.97		71.5667	52.835	72.9793	89.4153
Solyc06g066540	Ethylene-responsive transcription factor	ERF	ERF-75	[97]	AT5G11590	ERF041-TINY2	1.826	1.226	1.8505	2.791		2.02267	2.85967	3.67233	2.05367
Solyc06g068360	Ethylene-responsive transcription factor	ERF	ERF-76	[97]			11.2745	16.407	13.7255	12.92		2.68867	9.76567	12.6313	15.1407
Solyc06g068830	Ethylene-responsive transcription factor	ERF	ERF-77	[97]			0.0945	5.3995	1.943	1.608		0.257	3.76867	1.07533	1.85067
Solyc06g082590	DNA-binding protein Pti6	ERF	ERF-78	[97]			37.195	32.942	5.9785	19.0275		96.817	13.2723	8.734	18.9843
Solyc07g042230	Ethylene-responsive transcription factor	ERF	ERF-79	[97]			0	0	0	0.042		2.83433	0.0526667	0.134667	0.174333
Solyc07g049490	Ethylene Response Factor F.3	ERF	ERF-80	[97]			29.7455	26.7145	21.1405	23.4535		22.3283	19.5337	18.681	19.5467
Solyc07g053740	Ethylene Response Factor F.4	ERF	ERF-81	[97]	AT3G15210	RAP2.5-ATERF4-ERF4-ATERF-4	93.5875	123.536	46.2255	67.5145		635.513	75.825	65.5067	64.9607
Solyc07g054220	Ethylene-responsive transcription factor	ERF	ERF-82	[97]	AT4G28140	ERF54	0.4695	1.227	0.839	1.2185		4.90733	1.648	1.92267	2.53633
Solyc07g064890	Ethylene Response Factor F.2	ERF	ERF-83	[97]	AT1G50640	ERF3-ATERF3	119.6	182.656	78.957	98.602		122.529	77.3127	79.6643	93.2733
Solyc08g007230	Ethylene-responsive transcription factor 2	ERF	ERF-84	[97]			5.3795	0.0475	0	0.0515		3.533	0.0706667	0.0356667	0.0713333
Solyc08g007820	Dehydration-responsive element-binding protein 1E	ERF	ERF-85	[97]			4.443	1.296	0.5225	0.8145		320.77	0.417	0.37	0.377667
Solyc08g007830	Dehydration-responsive element-binding protein 1E	ERF	ERF-86	[97]			1.481	0.089	0	0		99.1393	0.0596667	0	0.003
Solyc08g008305	Ethylene-responsive transcription factor	ERF	ERF-87		AT1G64380
Solyc08g066660	Ethylene-responsive transcription factor TINY	ERF	ERF-88	[97]	AT5G11590	ERF041-TINY2	1.679	18.453	23.5555	9.0515		2.61133	8.94433	10.5357	4.08767
Solyc08g078170	Ethylene-responsive transcription factor 2	ERF	ERF-89	[97]
Solyc08g078180	Ethylene Response Factor A.1	ERF	ERF-90	[97]			0.3705	0.8455	0.46	0.5245		10.0333	0.660667	0.530667	0.635333
Solyc08g078190	Ethylene-responsive transcription factor 5	ERF	ERF-91	[97]	AT5G47230	ERF5-AtMACD1-ATERF5-ATERF-5	11.0875	2.8695	1.17	1.4665		34.4063	3.16133	2.22267	3.15467
Solyc08g078410	Ethylene-responsive transcription factor	ERF	ERF-92	[97]	AT4G16750	ERF39
Solyc08g078420	Ethylene-responsive transcription factor	ERF	ERF-93	[97]
Solyc08g080290	Ethylene-responsive transcription factor	ERF	ERF-94	[97]	AT5G52020		0.904	2.3265	1.309	1.105		63.0177	1.48133	1.26933	1.267
Solyc08g081960	Solanum Lycopersicum Cytokinin Response Factor 2	ERF	ERF-95	[97]	AT4G23750	CRF2-TMO3	7.5955	5.4435	2.167	3.968		1.862	2.823	3.03567	2.214
Solyc08g082210	Ethylene-responsive transcription factor	ERF	ERF-96	[97]	AT1G64380		0.8935	3.409	0.7015	1.5425		9.849	5.51433	2.80833	2.84033
Solyc09g009240	Ethylene-responsive transcription factor	ERF	ERF-97	[97]
Solyc09g059510	Ethylene-responsive transcription factor-like protein	ERF	ERF-98		AT4G13040	APD1	48.0095	33.9925	40.6105	43.6555		39.544	23.403	26.1373	34.7883
Solyc09g066340	Ethylene-responsive transcription factor	ERF	ERF-99	[97]	AT1G04370	ATERF14-ERF97-ERF14-
Solyc09g066350	Ethylene-responsive transcription factor	ERF	ERF-100	[97]
Solyc09g066360	Ethylene Response Factor C.3	ERF	ERF-101	[97]
Solyc09g075420	ethylene response factor E.1	ERF	ERF-102	[97]	AT2G47520	ERF71-AtERF71-HRE2-	198.191	376.262	172.403	115.219		108.916	156.728	299.462	299.87
Solyc09g089910	Ethylene-responsive transcription factor	ERF	ERF-103	[97]	AT3G23220/AT5G43410	ESE1-ERF95/ERF96	0.0095	0.0095	0	0.053		9.69633	0.0363333	0.024	0.113333
Solyc09g089920	Ethylene-responsive transcription factor	ERF	ERF-104	[97]
Solyc09g089930	ethylene responsive factor E.2	ERF	ERF-105	[97]	AT3G23240	ERF1B-AtERF-ERF1-	0.885	1.6435	0.409	0.436		21.2763	0.968	0.455667	2.23067
Solyc09g091950	Ethylene-responsive transcription factor	ERF	ERF-106	[97]	AT4G13620		0.057	0.019	0	0		0.166333	0.144333	1.139	1.41867
Solyc10g006130	EAR motif SlERF36	ERF	ERF-107	[97]	AT1G50640	ERF3-ATERF3	41.032	36.3005	14.3905	25.7445		431.697	14.34	12.756	17.7947
Solyc10g009110	ethylene response factor F.5	ERF	ERF-108	[97]	AT3G15210	RAP2.5-ATERF4-ERF4-ATERF-4	23.594	33.411	8.553	16.108		183.96	9.993	22.2567	28.0353
Solyc10g050970	Ethylene Response Factor D.4	ERF	ERF-109	[97]	AT4G34410	ERF109-RRTF1	4.124	0.272	0	0.0095		165.948	0.360667	0.00566667	0.011
Solyc10g076370	Dehydration-responsive element-binding protein 2A	ERF	ERF-110	[97]			0.203	20.028	11.2885	9.029		0.115667	4.445	1.30733	1.11667
Solyc10g076380	Dehydration responsive element binding transcription factor	ERF	ERF-111	[97]
Solyc10g078610	Ethylene-responsive transcription factor CRF3	ERF	ERF-112	[97]			1.1025	0.587	0.115	0.2315		1.06233	1.31733	0.541	0.7
Solyc10g080650	Ethylene-responsive transcription factor	ERF	ERF-113	[97]
Solyc10g083560	Ethylene-responsive transcription factor	ERF	ERF-114	[97]	AT2G36450	HRD
Solyc11g006050	Ethylene-responsive transcription factor	ERF	ERF-115	[97]
Solyc11g011740	Ethylene-responsive transcription factor	ERF	ERF-116	[97]			0.539	0.9305	0.222	0.548		0.449	0.432333	0.616333	0.740333
Solyc11g011750	Ethylene-responsive transcription factor 1B	ERF	ERF-117	[97]			0.1805	0.3375	0.241	0.0385		0.856667	1.20433	0.656	1.047
Solyc11g012980	Ethylene-responsive transcription factor	ERF	ERF-118	[97]	AT1G21910/AT1G44830	DREB26/EPI1-ERF014-AtERF014-	13.7855	11.0505	4.1305	4.4165		41.024	2.71533	3.52633	4.406
Solyc11g042560	Ethylene-responsive transcription factor	ERF	ERF-119	[97]	AT1G33760	ERF022	2.155	0.1695	0.059	0.0515		19.539	0.0623333	0.217	0.175
Solyc11g042580	Ethylene-responsive transcription factor	ERF	ERF-120	[97]	AT1G71450	FUF1
Solyc11g045680	Ethylene-responsive transcription factor	ERF	ERF-121	[97]	AT5G13910	LEP
Solyc11g045690	Ethylene-responsive transcription factor	ERF	ERF-122	[97]	AT1G28160
Solyc12g005960	Ethylene-responsive transcription factor 3	ERF	ERF-123	[97]			30.8385	13.827	10.866	14.5975		10.9617	9.61367	11.4753	10.97
Solyc12g008350	dehydration responsive element binding protein 2	ERF	ERF-124	[97]			12.746	12.0865	7.1715	3.5735		95.1107	12.6893	4.98433	2.51
Solyc12g009240	Ethylene-responsive transcription factor	ERF	ERF-125	[97]	AT1G19210	ERF017-ERF17	17.429	6.45	0.677	0.1985		212.266	0.161	0.434667	0.185333
Solyc12g009490	ethylene-responsive transcription factor WIN1-like	ERF	ERF-126	[97]
Solyc12g013660	Ethylene-responsive transcription factor	ERF	ERF-127	[97]			0	0	0	0		0.0186667	0.191	0.231	2.01633
Solyc12g038440	Ethylene-responsive transcription factor	ERF	ERF-128	[97]
Solyc12g038450	Ethylene-responsive transcription factor	ERF	ERF-129	[97]
Solyc12g042210	Ethylene-responsive transcription factor	ERF	ERF-130	[97]	AT5G61890	ERF114	2.921	13.3755	5.563	4.386		0.910333	6.71667	3.074	2.14733
Solyc12g044390	Ethylene-responsive transcription factor	ERF	ERF-131	[97]
Solyc12g049560	Ethylene-responsive transcription factor	ERF	ERF-132	[97]			38.2045	14.8525	22.885	26.91		21.1543	30.1707	36.6183	35.6537
Solyc12g056430	Dehydration-responsive element-binding protein 1A	ERF	ERF-133	[97]
Solyc12g056590	Ethylene Response Factor D.2	ERF	ERF-134	[97]	AT5G50080	ERF110	0.2445	10.124	1.7975	1.41		2.55233	10.421	2.41567	3.32533
Solyc12g056980	Ethylene-responsive transcription factor	ERF	ERF-135	[97]			22.319	34.5705	8.158	10.09		19.2127	18.923	11.3587	15.0337
Solyc01g096850	Protein FAR1-RELATED SEQUENCE 3	FAR1	FRS3a		AT2G27110	FRS3	16.17	11.0545	14.668	10.879		13.1553	12.0073	12.1207	17.605
Solyc01g103180	Protein FAR1-RELATED SEQUENCE 11	FAR1	FRS11		AT1G10240	FRS11	13.3525	12.5235	12.854	11.648		10.5773	11.271	13.4307	14.3093
Solyc01g112320	Protein FAR1-RELATED SEQUENCE 5	FAR1	FRS5		AT4G38180	FRS5	28.3565	21.929	25.487	26.3555		23.6323	23.8587	27.7993	30.768
Solyc01g150145	protein FAR1-RELATED SEQUENCE 5-like	FAR1	FRS5L1
Solyc02g068550	FAR1-related sequence 1	FAR1	FRF1L				6.937	2.9265	5.551	4.601		5.70233	4.681	5.551	6.33133
Solyc02g092170	protein FAR1-RELATED SEQUENCE 5-like	FAR1	FRS5L2
Solyc02g150118	protein FAR1-RELATED SEQUENCE 5-like	FAR1	FRS5L3
Solyc03g044690	Protein FAR1-RELATED SEQUENCE 5	FAR1	FRS5L4
Solyc03g082435	protein FAR1-RELATED SEQUENCE 5-like	FAR1	FRS5L5
Solyc03g094125	protein FAR1-RELATED SEQUENCE 5-like	FAR1	FRS5L6
Solyc03g113110	Protein FAR1-RELATED SEQUENCE 5	FAR1	FRS5L7
Solyc03g117520	Protein FAR1-RELATED SEQUENCE 6	FAR1	FRS6		AT1G52520	FRS6	13.7005	17.988	16.927	14.4875		12.4443	13.3703	15.241	16.9103
Solyc03g121630	Protein FAR1-RELATED SEQUENCE 4	FAR1	FRS4		AT1G76320	FRS4-CPD25	11.7565	10.34	15.327	15.4835		16.059	16.6397	17.349	18.7737
Solyc03g150148	protein FAR1-RELATED SEQUENCE 5-like	FAR1	FRS5L8
Solyc04g070995	protein FAR1-RELATED SEQUENCE 5-like	FAR1	FRS5L9
Solyc04g072045	protein FAR1-RELATED SEQUENCE 5-like	FAR1	FRS5L10
Solyc04g082845	Protein FAR1-RELATED SEQUENCE 5	FAR1	FRS5L11				6.06	3.2645	3.6835	3.964		3.25367	3.26967	3.64	4.61167
Solyc05g009583	protein FAR1-RELATED SEQUENCE 5-like	FAR1	FRS5L12
Solyc05g014930	Protein FAR1-RELATED SEQUENCE 5	FAR1	FRS5L13
Solyc06g054040	Protein FAR1-RELATED SEQUENCE 5	FAR1	FRS5L14
Solyc06g068200	protein FAR1-RELATED SEQUENCE 6-like	FAR1	FRS6L				2.6005	2.427	2.358	2.108		1.20433	1.89067	1.189	1.89233
Solyc06g068210	Protein FAR1-RELATED SEQUENCE 8	FAR1	FRS8		AT1G80010	FRS8	16.1355	10.369	10.467	10.8605		9.406	9.09867	11.3287	16.9957
Solyc06g073200	Protein FAR1-RELATED SEQUENCE 5	FAR1	FRS11		AT3G59470	FRF1	9.9715	9.6565	5.9865	7.379		5.53933	8.71833	8.054	8.958
Solyc06g073210	protein FAR1-RELATED SEQUENCE 5	FAR1	FRS2L				6.2525	5.684	3.829	4.141		4.03667	5.16667	4.47633	5.44433
Solyc07g043270	Protein FAR-RED ELONGATED HYPOCOTYL 3	FAR1	FRS3b		AT3G22170	FHY3-CPD45	88.23	112.391	106.628	98.954		89.3073	85.7957	90.5917	116.571
Solyc07g045520	FAR1-related sequence 10	FAR1	FRS10		AT5G28530	FRS10	7.5945	5.7205	5.6455	3.981		5.154	5.05733	6.009	7.24533
Solyc08g060840	Protein FAR-RED IMPAIRED RESPONSE 1	FAR1	FRF1		AT4G15090	FAR1	18.042	18.8345	26.9335	19.293		21.794	24.209	23.2047	31.327
Solyc09g057870	protein FAR1-RELATED SEQUENCE 7	FAR1	FRF2		AT3G07500	FRF2	16.9125	12.315	11.3555	12.103		10.3417	9.40433	11.165	12.053
Solyc09g057880	protein FAR1-RELATED SEQUENCE 5	FAR1	FRF4		AT2G43280	FRF4	10.4175	7.6855	5.652	6.844		4.45967	4.301	5.842	5.80133
Solyc10g044585	protein FAR1-RELATED SEQUENCE 5-like	FAR1	FRS5L15
Solyc10g084220	Protein FAR1-RELATED SEQUENCE 7	FAR1	FRS12		AT3G06250/AT5G18960	FRS7/FRS12	15.8345	15.1775	21.1755	17.246		14.2603	17.8467	19.382	25.1937
Solyc11g017210	protein FAR1-RELATED SEQUENCE 5-like	FAR1	FRS5L16
Solyc11g020215	protein FAR1-RELATED SEQUENCE 5-like	FAR1	FRS5L17
Solyc11g051000	Protein FAR1-related sequence 5-like	FAR1	FRS5L18
Solyc12g011027	protein FAR1-RELATED SEQUENCE 5-like	FAR1	FRS5L19
Solyc01g108300	Two-component response regulator ARR18	G2-like	G2L-1				128.952	76.582	73.4115	135.994		40.6677	74.4437	68.8047	83.6623
Solyc02g076670	Myb domain, Homeodomain-like protein	G2-like	G2L-2				0.967	2.2615	3.9255	4.045		0.831	1.897	2.45	3.455
Solyc02g080710	Homeodomain-like protein	G2-like	G2L-3
Solyc02g080730	Homeodomain-like protein	G2-like	G2L-4
Solyc02g080740	Homeodomain-like superfamily protein	G2-like	G2L-5
Solyc02g080860	protein PHOSPHATE STARVATION RESPONSE 1-like	G2-like	G2L-6		AT2G02060/AT4G04605
Solyc02g090400	Myb family transcription factor	G2-like	G2L-7				29.494	21.19	3.5745	4.466		62.0697	5.39733	3.52	3.494
Solyc03g006150	Myb domain, Homeodomain-like protein	G2-like	G2L-8		AT2G42660		0.3585	1.121	0.6235	1.0245		0.511	1.079	0.951333	4.31967
Solyc03g083340	Two-component response regulator	G2-like	G2L-9
Solyc04g008480	Homeodomain-like protein	G2-like	G2L-10		AT1G14600/AT2G02060/AT4G04605		0	0.169	0.8085	3.004		0.119333	1.292	3.983	3.41967
Solyc04g015290	Myb family transcription factor APL	G2-like	G2L-11				25.4525	32.8395	30.34	31.5505		21.3703	25.2443	27.3223	30.0467
Solyc04g050070	Protein PHR1-LIKE 1	G2-like	G2L-12
Solyc04g051080	Two-component response regulator	G2-like	G2L-13
Solyc04g079600	Homeodomain-like superfamily protein	G2-like	G2L-14		AT5G42630	KAN4-ATS	3.2565	1.6855	2.4475	2.0315		0.551333	2.07033	3.65433	1.697
Solyc05g007890	Myb family transcription factor APL	G2-like	G2L-15		AT1G69580		21.1135	12.0155	8.4345	8.4935		4.646	2.45333	5.25	10.4887
Solyc05g009720	Myb-like transcription factor family protein	G2-like	G2L-16		AT1G68670	NIGT1.2-HHO2	69.282	21.7245	19.5205	30.9445		15.055	34.211	31.6413	45.589
Solyc05g049860	Two-component response regulator	G2-like	G2L-17
Solyc05g051060	Homeodomain-like superfamily protein	G2-like	G2L-18		AT5G16560	KAN-KAN1	15.2275	12.612	10.213	8.355		14.6493	7.511	7.52833	7.11367
Solyc05g055940	Protein PHR1-LIKE 1	G2-like	G2L-19				55.2065	211.147	194.462	167.845		91.4243	129.684	105.511	120.028
Solyc06g005680	Two-component response regulator	G2-like	G2L-20		AT3G46640	LUX-PCL1	2.979	1.5385	1.608	4.063		0.038	2.516	2.96367	3.031
Solyc06g008200	Transcription repressor KAN1	G2-like	G2L-21				49.5425	23.9915	30.5865	31.7785		23.4083	40.674	35.4043	44.045
Solyc06g051060	Homeodomain-like protein	G2-like	G2L-22		AT2G40260		0.816	0.531	0.2195	0.178		0.279	0.317667	0.809667	0.985
Solyc06g066180	Myb family transcription factor APL	G2-like	G2L-23				6.5935	8.0875	0.78	1.5785		9.685	8.35533	19.639	16.194
Solyc06g066340	Homeodomain-like superfamily protein	G2-like	G2L-24				17.1855	38.5665	16.7805	15.4085		19.9773	14.498	17.3743	18.151
Solyc06g076350	LePCL1	G2-like	G2L-25				57.11	20.3325	14.7825	26.0475		2.49533	25.1333	27.897	40.9073
Solyc07g045000	Homeodomain-like protein	G2-like	G2L-26				0.4725	6.3835	4.062	3.3805		0.774	6.41767	4.06567	6.76233
Solyc07g049640	MYB-like transcription factor family protein	G2-like	G2L-27
Solyc07g053630	Two-component response regulator	G2-like	G2L-28		AT2G20570/AT5G44190	ATGLK1-GLK1-GPRI1/ATGLK2-GPRI2-GLK2-	20.7485	51.6035	27.911	21.323		25.086	27.4977	18.443	13.9703
Solyc08g005260	Homeodomain-like superfamily protein	G2-like	G2L-29		AT1G32240	KAN2	7.9445	10.249	3.8115	6.162		5.24233	3.20667	2.99167	3.893
Solyc08g076010	Myb family transcription factor APL	G2-like	G2L-30		AT5G45580	GFR	0.1565	1.1155	0.8665	1.3745		5.894	2.09667	5.58733	2.121
Solyc08g076400	Homeodomain-like superfamily protein	G2-like	G2L-31				2.514	13.9715	7.847	7.6085		6.70433	4.48967	11.8023	15.4053
Solyc09g005030	Homeodomain-like superfamily protein	G2-like	G2L-32				0.7535	0.9	1.4265	0.983		1.088	0.61	1.50567	1.928
Solyc09g005370	MYB-like transcription factor	G2-like	G2L-33
Solyc09g072830	Transcription repressor KAN1	G2-like	G2L-34		AT5G29000	PHL1	41.7555	45.929	45.2735	44.4155		44.6563	65.0757	50.0417	52.623
Solyc09g091880	Myb family transcription factor APL	G2-like	G2L-35		AT3G24120	PHL2	4.8655	8.6805	4.295	2.7985		3.625	11.59	8.91167	5.017
Solyc10g076460	Homeodomain-like superfamily protein	G2-like	G2L-36		AT2G38300		0.146	0.98	4.703	2.177		1.559	2.45567	7.82533	10.445
Solyc10g078310	Two-component response regulator ARR1	G2-like	G2L-37		AT3G10760		53.679	21.426	23.6875	34.351		24.967	20.9727	28.154	27.4893
Solyc10g078720	Myb family transcription factor APL	G2-like	G2L-38		AT5G06800		14.697	6.623	2.361	1.1185		5.17833	11.317	5.74667	10.5223
Solyc10g080460	Myb family transcription factor APL	G2-like	G2L-39				0.0285	0.6145	0.9145	0.478		1.088	1.642	4.21667	4.312
Solyc10g080960	Two-component response regulator ARR1	G2-like	G2L-40		AT3G10760		5.455	13.838	14.3645	16.853		6.781	14.0287	9.35667	9.09433
Solyc10g083340	Myb family transcription factor APL	G2-like	G2L-41		AT3G04030	MYR2	11.779	15.0245	6.592	4.942		18.9643	9.05533	4.42133	4.492
Solyc10g085620	Myb family transcription factor APL	G2-like	G2L-42		AT3G04030/AT5G18240	MYR2/ATMYR1-MYR1	7.5765	14.5335	6.57	6.8345		4.68167	4.70333	1.677	2.216
Solyc11g011770	Homeodomain-like superfamily protein	G2-like	G2L-43		AT5G16560	KAN-KAN1	6.0575	5.501	3.6495	2.7505		5.73667	4.16567	4.494	4.94067
Solyc11g022470	MYB transcription factor	G2-like	G2L-44				50.916	28.031	26.2095	33.421		27.563	33.2443	28.5347	36.3283
Solyc11g067280	MYB transcription factor	G2-like	G2L-45		AT2G01060		36.4185	58.471	35.595	40.1705		31.7917	44.9567	38.2863	41.1117
Solyc12g006280	Homeodomain-like protein	G2-like	G2L-46				2.612	0.9225	0.718	0.72		0.295333	1.213	0.585667	0.533
Solyc12g006800	myb family transcription factor EFM-like	G2-like	G2L-47		AT2G03500	EFM-HHO4	21.374	25.964	7.1265	9.5385		13.1233	7.09167	5.76333	8.46967
Solyc12g017370	Myb family transcription factor APL	G2-like	G2L-48		AT1G79430	WDY-APL	26.8435	10.8885	5.969	9.2145		12.4663	9.50367	6.293	7.32233
Solyc12g098370	Myb family transcription factor APL	G2-like	G2L-49				38.1155	37.6595	39.711	32.8845		23.637	28.2403	30.3763	25.9057
Solyc01g060490	GATA transcription factor 23	GATA	GATA15L	[98]
Solyc01g090760	GATA transcription factor	GATA	GATA4L	[98]	AT2G45050/AT3G60530	GATA2/GATA4	22.8195	0.8455	0.016	0.255		2.558	0.528	13.2953	4.45033
Solyc01g100220	GATA transcription factor 23	GATA	GATA17L	[98]			3.303	5.155	2.067	3.689		2.36567	4.22033	4.56767	3.50133
Solyc01g106030	GATA transcription factor 28	GATA	GATA24/28	[98]	AT1G51600/AT3G21175	ZML2-TIFY2A-GATA28/TIFY2B-GATA24-ZML1-	29.04	26.752	26.07	28.4075		21.7353	26.9707	27.8847	31.1533
Solyc01g106040	GATA transcription factor 24	GATA	GATA19L	[98]			3.6525	3.0665	2.8515	3.752		1.15367	3.67233	4.264	4.75133
Solyc01g110310	GATA transcription factor	GATA	GATA5a	[98]	AT5G66320	GATA5	115.5	80.6995	45.703	71.761		97.3757	64.6003	65.7787	62.5843
Solyc02g062380	GATA transcription factor	GATA	GATA5L1	[98]			0.9765	1.0165	0.8275	1.495		1.126	2.229	2.75033	1.98033
Solyc02g062760	GATA transcription factor 18-like	GATA	GATA19L	[98]			3.3285	3.08	0.9025	1.894		2.85833	1.724	1.54433	2.17533
Solyc02g084590	GATA transcription factor	GATA	GATA5b	[98]	AT5G66320	GATA5	15.669	21.5955	10.3755	11.0855		4.77467	6.528	19.4853	19.5803
Solyc02g085190	GATA transcription factor 19-like	GATA	GATA18	[98]	AT3G50870	GATA18-MNP-AtGATA18-HAN	0.4485	0.2675	0.382	1.0735		0.188	0.113333	0.811	0.719333
Solyc03g033660	GATA transcription factor	GATA	GATA5L2	[98]			6.219	2.3295	1.7465	2.9435		1.084	0.476333	3.784	2.34833
Solyc03g120890	GATA transcription factor	GATA	GATA12	[98]	AT5G25830	GATA12	59.3285	13.309	11.5725	10.2575		14.884	6.878	12.8633	11.046
Solyc04g015360	GATA transcription factor	GATA	GATA8	[98]	AT3G54810	BME3-GATA8-BME3-ZF-	16.219	32.4615	17.667	12.727		267.628	34.524	24.1393	20.1243
Solyc04g076530	GATA transcription factor 28	GATA	GATA24L	[98]			39.0725	30.8075	28.608	29.3225		22.344	16.0297	19.531	34.7953
Solyc05g053500	GATA transcription factor	GATA	GATA1L	[98]	AT3G24050	GATA1	26.5255	8.748	7.847	8.943		29.3767	9.30933	8.899	9.909
Solyc05g054400	GATA transcription factor 23	GATA	GATA15/17	[98]	AT3G06740/AT3G16870	GATA15/GATA17	37.736	33.148	18.4185	30.931		23.6267	34.2737	28.409	24.7837
Solyc05g056120	GATA transcription factor	GATA	GATA8	[98]	AT3G54810	BME3-GATA8-BME3-ZF-	29.1995	94.384	56.4595	50.3905		194.739	59.636	66.4473	44.5497
Solyc06g060940	GATA transcription factor 26	GATA	GATA26	[98]	AT4G17570	GATA26	3.524	9.272	6.6235	7.295		6.01167	10.2137	10.514	12.5867
Solyc06g075140	GATA transcription factor 8	GATA	GATA511	[98]	AT1G08010	GATA11
Solyc07g038160	GATA transcription factor 16	GATA	GATA21/22	[98]	AT4G26150/AT5G56860	CGA1-GNL-GATA22/GNC-GATA21	0.92	0.2165	0.769	0.529		0.351333	0.205333	0.924	0.635333
Solyc08g007190	GATA transcription factor 26	GATA	GATA26	[98]	AT4G17570	GATA26	13.4245	15.181	13.5065	15.171		20.2733	18.469	17.7907	21.9317
Solyc08g066510	GATA transcription factor	GATA	GATA12	[98]	AT4G32890/AT5G25830	GATA9/GATA12	1.0855	0.1965	0.1505	0.5185		0.717333	0.272333	4.37167	3.48
Solyc08g077960	GATA transcription factor 26	GATA	GATA26	[98]	AT4G17570	GATA26	19.9545	21.319	18.951	23.9295		14.674	22.2627	20.3047	29.315
Solyc09g075610	GATA transcription factor 15	GATA	GATA16L	[98]			3.389	3.677	1.3825	1.9845		1.32833	0.992	4.91167	3.654
Solyc09g091250	GATA transcription factor	GATA	GATA1	[98]	AT3G24050	GATA1	59.4305	45.153	26.699	38.7475		30.273	42.0213	29.4247	33.5567
Solyc10g018560	GATA transcription factor	GATA	GATA4L	[98]
Solyc10g047640	GATA transcription factor 28	GATA	GATA24/28	[98]	AT1G51600/AT3G21175	ZML2-TIFY2A-GATA28/TIFY2B-GATA24-ZML1-	16.519	13.113	14.8115	16.697		12.967	14.8117	16.279	17.753
Solyc11g069510	GATA transcription factor 8	GATA	GATA10/11	[98]	AT1G08000/AT1G08010	GATA10/GATA11	61.8495	26.8325	29.8675	40.4225		18.4013	22.5627	39.391	32.3753
Solyc12g008830	GATA transcription factor 16	GATA	GATA22L	[98]			4.5195	9.5475	1.633	5.505		0.441667	0.461	0.0933333	0.158
Solyc12g099370	GATA transcription factor 23	GATA	GATA23L	[98]			17.1595	24.801	13.5355	23.68		10.5807	35.9107	29.4123	20.158
Solyc01g097890	DNA-binding storekeeper transcriptional regulator	GeBP	GeBP				31.5835	20.38	23.8545	29.8865		14.53	22.5053	34.9943	36.9957
Solyc02g014740	DNA-binding storekeeper transcriptional regulator	GeBP	GeBP		AT4G00610
Solyc02g014750	DNA-binding storekeeper transcriptional regulator	GeBP	GeBP
Solyc02g083750	DNA-binding storekeeper transcriptional regulator	GeBP	GeBP		AT3G04930/AT5G28040	VFP4	43.712	43.561	31.105	30.3995		35.9733	40.7063	37.245	36.6423
Solyc05g051330	DNA-binding storekeeper transcriptional regulator	GeBP	GeBP				11.574	5.096	5.8455	7.6515		4.092	5.641	5.57633	8.646
Solyc07g052760	DNA-binding storekeeper transcriptional regulator	GeBP	GeBP				24.251	19.4625	16.4235	20.9245		19.272	22.675	24.8207	23.1733
Solyc07g052830	DNA-binding storekeeper transcriptional regulator	GeBP	GeBP				14.216	16.347	13.7415	12.7255		14.9787	21.2353	17.5987	16.798
Solyc07g052900	DNA-binding storekeeper transcriptional regulator	GeBP	GeBP		AT1G61730/AT4G00390		54.162	60.9655	42.7355	62.8275		69.781	76.1793	60.8483	69.319
Solyc07g064000	Unknown protein	GeBP	GeBP
Solyc01g008910	Transcription factor GRAS	GRAS	SCL3a	[93]	AT1G50420	SCL-3	2.5425	3.59	4.2	3.017		1.003	4.435	9.17467	8.30133
Solyc01g009840	Transcription factor GRAS	GRAS	SCL28L	[93]
Solyc01g059950	Transcription factor GRAS	GRAS	RGL2L1	[93]			2.708	15.2635	15.8755	9.526		0.645	1.999	1.28733	0.767667
Solyc01g059960	Transcription factor GRAS	GRAS	RGL2L2	[93]
Solyc01g079370	Transcription factor GRAS	GRAS	RGL1L1	[93]	AT1G02570/AT2G47360		1.357	6.6635	3.616	1.9335		3.27633	2.266	5.937	4.67033
Solyc01g079380	Transcription factor GRAS	GRAS	RGL2L3	[93]
Solyc01g090950	Transcription factor GRAS	GRAS	SCL6	[93]	AT4G00150	ATHAM3-LOM3-SCL6-IV-HAM3	48.406	43.825	31.473	37.054		33.469	25.6433	39.6867	33.6887
Solyc01g100200	gras4	GRAS	GRAS4L	[93]			75.827	39.327	35.244	44.8475		164.647	46.665	80.9433	83.1113
Solyc02g085340	Transcription factor GRAS	GRAS	SCL4L	[93]	AT5G66770		70.9065	30.8875	37.0755	45.52		25.651	47.9573	49.0753	60.181
Solyc02g085600	Scarecrow-like protein 15	GRAS	SCL15	[93]	AT4G36710	HAM4-SCL15-AtHAM4-	25.4175	64.676	66.823	68.761		35.8837	31.7773	10.9837	12.059
Solyc02g092370	Transcription factor GRAS	GRAS	SHR	[93]	AT4G37650	SHR-SGR7-EAL1-	25.1635	66.7975	20.112	22.037		37.4263	26.287	25.4547	36.0837
Solyc02g092570	Transcription factor GRAS	GRAS	SCL32	[93]	AT3G49950		0.038	0.1835	0.4235	0.679		0.019	0.318667	1.61033	0.809333
Solyc02g094340	Transcription factor GRAS	GRAS	RGA1L1	[93]
Solyc03g025170	gras10	GRAS	SCL8	[93]	AT5G52510	SCL8	43.67	41.844	44.3205	40.8095		73.7723	35.2207	38.4087	42.8303
Solyc03g110950	Transcription factor GRAS	GRAS	RGL1L2	[93]
Solyc03g123400	GRAS16	GRAS	NSP1L	[93]	AT3G13840		1.15	4.8385	4.717	4.0335		9.12667	8.98833	7.39133	6.679
Solyc04g011630	Transcription factor GRAS	GRAS	SCL14L	[93]			13.071	16.4255	12.7055	13.7775		8.06367	12.4837	12.8773	13.3603
Solyc04g014830	Transcription factor GRAS	GRAS	SCL13	[93]	AT4G17230	SCL13	7.92	3.332	4.9785	8.206		3.26767	0.858	2.16767	7.595
Solyc04g064550	gras6	GRAS	SCL1	[93]	AT1G21450	SCL1	81.957	45.6365	41.0925	80.151		139.147	45.824	57.895	89.006
Solyc05g053090	Transcription factor GRAS	GRAS	SCL14L	[93]			9.582	19.5985	22.7755	23.34		22.2627	20.5393	17.0833	31.3477
Solyc05g053420	Transcription factor GRAS	GRAS	RGAL3	[93]
Solyc05g054170	Scarecrow-like protein 5	GRAS	SCL13L	[93]			11.3865	11.417	12.8455	13.4535		57.6603	18.5003	31.335	35.4547
Solyc06g009610	Transcription factor GRAS	GRAS	RGAL5L	[93]			0	0.0185	0.042	0.0575		0.072	0.051	1.39833	0.983333
Solyc06g035620	Transcription factor GRAS	GRAS	SCL21L	[93]			6.476	4.883	5.636	6.9745		119.725	7.80033	5.55567	7.37367
Solyc06g036170	gras9	GRAS	LSCL8L	[93]			29.9365	10.1805	13.084	22.156		61.0517	20.9803	10.3937	17.9573
Solyc06g076280	Transcription factor GRAS	GRAS	SCL14	[93]	AT1G07530	ATGRAS2-GRAS2-SCL14-	16.4995	20.7025	18.2995	21.394		117.261	20.2723	27.3623	37.145
Solyc06g076290	Transcription factor GRAS	GRAS	SCL30L	[93]			0.0875	0.2855	0.5055	0.2325		1.54367	0.077	0.118333	0.262667
Solyc06g082530	Scarecrow-like protein 9	GRAS	SCL9L	[93]			0.0095	0.1605	0.1935	0.3805		4.44667	0.499	2.00133	3.05
Solyc07g043330	Transcription factor GRAS	GRAS	SCL23	[93]	AT5G41920	AtSCL23-SCL23	15.791	98.552	66.641	47.4815		18.7427	32.9577	28.598	16.6483
Solyc07g047950	Transcription factor GRAS	GRAS	PAT1	[93]	AT5G48150	PAT1	82.2055	54.914	75.3075	85.9285		40.6443	80.6077	65.0527	79.836
Solyc07g052960	GRAS family TF	GRAS	SCL32L	[93]
Solyc07g063940	SCARECROW	GRAS	GRAS2	[93]			19.305	18.878	20.925	19.1875		453.177	29.8553	41.6953	34.9187
Solyc07g065270	GRAS7	GRAS	PAT1	[93]			31.642	15.142	21.271	22.013		11.7933	23.1667	22.604	27.4147
Solyc07g066250	lateral suppresser	GRAS	SCL18	[93]	AT1G55580	SCL18-LAS
Solyc08g014030	Transcription factor GRAS	GRAS	SHR	[93]			70.0535	19.593	6.776	6.615		19.827	25.9277	29.2153	23.5517
Solyc08g078800	GRAS family transcription regulator	GRAS	SCL22L	[93]			28.7065	28.287	30.386	39.6745		26.2857	24.7473	43.4857	32.7183
Solyc08g080400	Transcription factor GRAS	GRAS	SCL28L	[93]	AT1G63100	SCL28	5.117	6.85	7.868	18.8485		14.6983	4.74067	33.8133	19.1263
Solyc09g010920	Transcription factor GRAS	GRAS	SCL9L1	[93]	AT2G37650		5.516	4.638	6.323	4.7495		6.65833	7.76233	7.91133	9.561
Solyc09g018460	GRAS5	GRAS	SCL22L1	[93]			0.249	2.2045	2.4885	1.9645		0.429667	2.672	1.31333	1.45533
Solyc09g066450	Transcription factor GRAS	GRAS	SCL	[93]
Solyc09g090830	BolA protein	GRAS	SCR	[93]			12.334	10.2455	9.3765	9.7805		7.794	10.111	9.01533	8.49667
Solyc10g074680	Protein SCARECROW	GRAS	SCL	[93]	AT3G54220	SGR1-SCR	27.1715	11.567	2.7005	3.8335		10.752	20.5933	24.5763	17.9677
Solyc10g086370	Transcription factor GRAS	GRAS	GAIL1	[93]			0.1255	0.4185	1.033	1.752		5.143	1.233	1.336	1.90167
Solyc10g086380	Transcription factor GRAS	GRAS	GAIL2	[93]			1.8685	12.5105	24.1275	29.678		6.00533	9.673	7.44533	13.8023
Solyc10g086530	Transcription factor GRAS	GRAS	SCL9	[93]	AT2G37650		3.045	1.387	1.404	0.861		10.1753	7.60633	3.71533	4.37533
Solyc11g005610	Transcription factor GRAS	GRAS	SCL22L2	[93]
Solyc11g011260	GAI	GRAS	SGAI	[93]	AT1G14920/AT2G01570/AT3G03450	RGA2-GAI/RGA-RGA1-RGA24/RGL2	258.756	152.269	153.473	149.383		117.613	111.846	119.905	98.7677
Solyc11g012510	GRAS1	GRAS	SCL13	[93]			13.4085	7.1565	9.2635	9.6395		160.62	14.6833	10.278	15.0397
Solyc11g013150	Nodulation-signaling pathway 2 protein	GRAS	SCL22L3	[93]	AT4G08250		2.8405	5.129	6.499	5.3205		2.53833	8.176	8.85367	9.844
Solyc11g017100	Transcription factor GRAS	GRAS	SCL21L1	[93]
Solyc12g005340	Transcription factor GRAS	GRAS	SCL21L2	[93]			42.761	18.204	25.227	29.5745		759.549	38.9917	26.5787	27.3683
Solyc12g049320	Nodulation-signaling pathway 1 protein	GRAS	SCL22L3	[93]			0.019	0.4655	0.6215	0.6145		0.429667	3.70033	5.33133	4.784
Solyc12g099220	GRAS family transcription factor	GRAS	RGL1	[93]			0.0475	0.403	0.1915	0.2235		0.219667	0.518333	0.328	0.263
Solyc12g099900	SCL3	GRAS	SCL3b	[93]	AT1G50420	SCL3-SCL-3	14.5485	50.625	62.579	35.716		4.93133	42.1603	49.9753	45.1567
Solyc01g091540	Growth-regulating factor 10	GRF	GRF10	[88]	AT2G45480	AtGRF9-GRF9	0.296	0.4545	0.4565	4.206		0.144	0.364	0.110667	0.145
Solyc02g092070	Growth-regulating factor 8	GRF	GRF6	[88]	AT4G37740	AtGRF2-GRF2	10.0975	3.6485	5.582	11.102		2.03667	3.56233	8.028	6.33533
Solyc03g082430	Growth-regulating factor 5	GRF	GRF8	[88]	AT5G53660	GRF7-AtGRF7	1.7435	2.3155	0.297	6.198		1.195	0.172667	0.501667	0.687
Solyc04g077510	Growth-regulating factor 8	GRF	GRF5	[88]	AT2G22840	AtGRF1-GRF1	26.2315	80.539	80.4865	86.37		9.37333	9.42067	27.553	18.5237
Solyc07g041640	Growth-regulating factor 5	GRF	GRF4	[88]	AT3G13960	GRF5-AtGRF5	2.231	0.569	0.187	2.049		1.60433	0.253667	2.38633	1.29
Solyc08g005430	Growth-regulating factor 4	GRF	GRF2	[88]			17.127	11.3525	9.1165	18.669		4.564	4.80967	7.24933	8.07233
Solyc08g075950	Growth-regulating factor 5	GRF	GRF3	[88]			1.371	1.304	1.544	5.8295		0.585667	0.733	1.92333	1.762
Solyc08g079800	Growth-regulating factor 10	GRF	GRF13	[88]			1.556	2.3015	2.3855	2.575		0.188	0.068	0.109	0.191667
Solyc08g083230	Growth-regulating factor 6	GRF	GRF7	[88]			0.97	0.981	0.463	0.6815		0.626333	0.743667	1.07833	0.691333
Solyc09g009200	Growth-regulating factor 3	GRF	GRF11	[88]	AT2G36400	AtGRF3-GRF3	3.5875	3.5955	1.52	6.0255		0.811667	0.54	4.459	2.79167
Solyc10g083510	Growth-regulating factor 3	GRF	GRF12	[88]			10.5	7.646	3.333	3.223		2.10867	1.18367	6.158	2.70067
Solyc12g096070	Growth-regulating factor 4	GRF	GRF1	[88]			4.892	4.2745	4.4535	10.8285		1.623	2.643	5.059	4.77533
Solyc01g007070	BEL1-like homeodomain protein 3	HB-BELL	HB1		AT2G35940	BLH1	108.049	219.935	130.524	113.692		107.985	169.563	94.9827	126.623
Solyc01g109980	BEL1-like homeodomain protein 7	HB-BELL	HB2		AT2G16400	BLH7	49.1425	54.274	53.3745	57.689		38.4867	54.2153	69.605	90.5463
Solyc02g065490	BEL1-like homeodomain protein 4	HB-BELL	HB3				2.954	4.3885	2.2245	2.33		5.024	1.75833	3.52133	5.063
Solyc02g089940	BEL1-like homeodomain protein 4	HB-BELL	HB4		AT4G36870	SAW1-BLH2	4.9705	11.297	10.84	9.1915		6.77333	7.49967	8.586	18.4857
Solyc04g025740	Homeobox-leucine zipper protein HDG1	HB-BELL	HB18
Solyc04g079830	Homeobox protein BEL1-like protein	HB-BELL	HB15				9.974	9.875	7.669	7.6695		11.525	12.489	9.89367	12.0603
Solyc04g080780	bell-like homeodomain protein 1	HB-BELL	HB5		AT1G75430	BLH11	41.061	68.5485	40.3045	24.5985		4.55533	1.27567	4.65567	2.00233
Solyc04g080790	BEL1-like homeodomain protein 7	HB-BELL	HB6		AT1G19700/AT1G75410	BLH10-BEL10/BLH3	12.7905	14.4445	13.233	13.9575		22.6477	21.159	22.9787	30.0217
Solyc06g074120	bell-like homeodomain protein 2	HB-BELL	HB7				17.141	24.9705	38.061	34.251		35.335	53.5643	54.2647	53.0083
Solyc07g026570	homeobox-leucine zipper protein ROC8	HB-BELL	HB19
Solyc08g061140	protein OVEREXPRESSOR OF CATIONIC PEROXIDASE 3	HB-BELL	HB20		AT5G11270	OCP3	19.3455	27.6205	19.5865	20.6945		14.7993	18.7973	17.2847	20.8847
Solyc08g065420	bell-like homeodomain protein 4	HB-BELL	HB8		AT4G32980	ATH1	22.768	54.756	90.8095	93.531		30.8027	31.147	42.047	25.4823
Solyc08g081400	bell-like homeodomain protein 3	HB-BELL	HB16		AT5G41410	BEL1	0.314	0.366	2.187	5.5295		0.869333	1.197	0.899	6.363
Solyc09g011380	BEL1-like homeodomain protein 9	HB-BELL	HB17		AT5G02030	PNY-VAN-LSN-BLR	78.475	48.4515	47.4435	62.1555		31.1113	23.3083	29.903	42.5303
Solyc09g015110	Homeobox-leucine zipper protein ROC8	HB-BELL	HB21
Solyc09g060175	Homeobox-leucine zipper protein ROC2	HB-BELL	HB22
Solyc09g066060	homeobox-leucine zipper protein ROC8	HB-BELL	HB23
Solyc09g074690	Homeobox protein LUMINIDEPENDENS	HB-BELL	HB12				3.1435	3.5235	5.592	3.9795		4.53033	4.79433	9.594	7.38533
Solyc09g074730	Homeobox protein LUMINIDEPENDENS	HB-BELL	HB24		AT4G02560	LD	29.399	14.6785	20.891	20.3595		22.358	16.4977	13.5353	17.653
Solyc10g007130	protein SAWADEE HOMEODOMAIN HOMOLOG 2-like	HB-BELL	HB13		AT3G18380	DTF2-SHH2	25.5635	21.3785	17.1785	19.296		20.6557	17.681	20.7317	26.2007
Solyc10g086640	BEL1-like homeodomain protein 9	HB-BELL	HB9				24.722	6.148	5.831	7.5315		9.40633	5.324	15.2453	11.1873
Solyc11g065110	Homeobox domain-containing protein	HB-BELL	HB14		AT4G03250		36.0815	26.397	27.78	28.2385		27.262	26.0037	26.9517	30.3343
Solyc11g068950	BEL1-like homeodomain protein 1	HB-BELL	HB10				39.0895	100.767	145.347	148.495		44.7433	90.895	74.758	98.8703
Solyc11g069890	BEL1-like homeodomain protein 8	HB-BELL	HB11		AT2G27990	BLH8-PNF	11.398	9.282	17.214	19.595		11.9057	5.08333	10.733	13.0557
Solyc12g099760	Homeobox domain-containing protein	HB-BELL	HB25				19.9275	14.6995	21.4455	20.781		14.343	19.6823	21.929	24.286
Solyc01g010600	Homeobox-leucine zipper protein HOX21	HB-HD-ZIP					0.2715	0.056	0	0		1.81667	0.033	0.012	0.00533333
Solyc01g073910	Homeobox-leucine zipper protein HOX27	HB-HD-ZIP			AT5G06710	HAT14	4.583	9.7115	10.563	21.406		16.2037	3.61567	6.118	9.388
Solyc01g090460	HD-ZIP	HB-HD-ZIP					85.7245	9.971	7.8695	8.159		10.0047	3.71167	4.86	4.21033
Solyc01g091630	cutin deficient 2	HB-HD-ZIP	CD2	[83]	AT3G61150/AT4G00730	HD-GL2-1-HDG1/AHDP-ANL2	27.2835	36.891	39.8055	34.908		33.0117	39.4407	30.9713	26.1593
Solyc01g096320	Homeobox-leucine zipper protein HOX6	HB-HD-ZIP			AT2G46680	HB-7-ATHB7-ATHB-7-	0.0475	0.215	4.133	20.193		12.153	10.05	6.78133	22.1993
Solyc02g024070	Homeobox leucine-zipper protein	HB-HD-ZIP			AT1G30490/AT2G34710	ATHB9-PHV/ATHB14-PHB-PHB-1D-ATHB-14	101.067	50.6805	23.84	48.1495		84.725	47.185	92.5353	116.76
Solyc02g063520	Homeobox-leucine zipper protein HAT22	HB-HD-ZIP					3.1155	3.298	2.2155	2.1665		9.32367	8.29767	1.66	3.68633
Solyc02g067410	Homeobox-leucine zipper protein HOX21	HB-HD-ZIP			AT5G15150	ATHB3-ATHB-3-HB-3-HAT7	0.0095	0.019	0.0095	0.029		0.119	0.0806667	1.41767	1.31433
Solyc02g080260	Woolly	HB-HD-ZIP	Wo	[83]	AT4G04890/AT4G21750	PDF2/ATML1	4.9725	5.8125	7.755	5.455		4.19633	7.028	5.443	4.447
Solyc02g086930	Homeobox-leucine zipper protein HAT5	HB-HD-ZIP			AT3G01470	AT3G01472.1-HD-ZIP-1-CPuORF33-HAT5	195.471	69.992	67.5095	76.864		235.293	128.42	132.504	171.643
Solyc02g087840	Leucine zipper, homeobox-associated, Homeodomain-like protein	HB-HD-ZIP			AT5G15150	ATHB3-ATHB-3-HB-3-HAT7	33.999	21.691	1.6715	2.649		31.594	8.40567	18.2757	9.341
Solyc02g091930	Homeobox-leucine zipper protein HOX27	HB-HD-ZIP			AT2G22800/AT4G37790	HAT9/HAT22-ABIG1	98.9765	80.3435	33.532	51.1155		31.2247	59.8503	36.723	60.0067
Solyc03g026070	Homeobox-leucine zipper protein ROC5	HB-HD-ZIP	HDZIV3	[83]			4.7245	5.6165	6.6245	6.032		4.305	8.21	8.90833	5.57633
Solyc03g031760	Homeobox-leucine zipper protein HDG2-like	HB-HD-ZIP					19.838	13.906	12.6605	12.031		16.4703	8.57	10.2927	7.686
Solyc03g082550	Homeobox-leucine zipper protein HOX6	HB-HD-ZIP					5.862	139.51	93.829	115.01		2.98567	62.884	19.4853	25.2523
Solyc03g098200	Homeobox-leucine zipper protein HDG12	HB-HD-ZIP	HDZIV8	[83]	AT1G73360	EDT1-ATHDG11-HDG11-AtEDT1	7.508	6.369	5.5135	6.4435		6.281	6.49567	5.11867	5.19167
Solyc03g113270	LEVAHOX1G L.esculentum homeobox	HB-HD-ZIP					277.608	319.7	279.645	359.925		472.479	513.037	527.006	619.524
Solyc03g120620	Homeobox-leucine zipper protein GLABRA 2	HB-HD-ZIP	HDZIV4	[83]	AT1G79840	GL2	8.118	26.2885	36.422	18.6255		16.4173	17.977	15.865	12.7187
Solyc03g120910	Homeobox leucine-zipper protein	HB-HD-ZIP			AT1G52150	ATHB15-CNA-ICU4-ATHB-15	142.092	158.645	128.065	138.069		70.7793	78.856	96.919	150.117
Solyc04g005800	Homeobox-leucine zipper protein HOX16	HB-HD-ZIP					11.085	8.2155	5.203	12.0515		6.39767	9.16367	11.3863	13.3223
Solyc04g074700	LES17306 homeodomain protein	HB-HD-ZIP					37.856	65.201	50.0955	39.8675		99.5967	52.7483	86.561	67.25
Solyc04g077220	Homeobox-leucine zipper protein HAT22	HB-HD-ZIP					1.6635	2.732	2.026	4.9775		10.17	4.06633	3.58233	16.9493
Solyc05g006980	Homeobox-leucine zipper protein HOX16	HB-HD-ZIP					29.7955	20.9955	20.1095	26.1875		8.94867	15.0233	25.8777	31.2707
Solyc05g007180	jasmonic acid 1	HB-HD-ZIP			AT1G69780	ATHB13	216.118	116.376	56.154	67.4525		164.167	46.281	65.1727	61.031
Solyc05g008050	Homeobox-leucine zipper protein HOX3	HB-HD-ZIP			AT2G01430	ATHB17-ATHB-17-HB17-	0.754	0.023	0	0.0095		0.125333	0.357	0.535667	0.221
Solyc05g015030	homeobox-leucine zipper protein ROC8	HB-HD-ZIP
Solyc05g051460	Homeobox-leucine zipper protein HOX4	HB-HD-ZIP			AT2G22430/AT4G40060/AT5G65310	HB6-ATHB6/ATHB16-ATHB-16-HB16/HB5-ATHB-5-ATHB5-	20.0845	46.2655	43.981	32.904		24.1367	47.3313	53.0123	38.4353
Solyc06g035940	Homeobox-leucine zipper protein ROC5	HB-HD-ZIP	HDZIV2	[83]
Solyc06g050160	Homeobox-leucine zipper protein HDG1	HB-HD-ZIP	HDZIV1	[83]			0.517	0.4215	0.034	0.182		0.883	0.295333	0.464	0.385333
Solyc06g053220	Homeobox-leucine zipper protein HOX6	HB-HD-ZIP					0.038	0.5495	0.2925	0.7605		0.131333	0.269333	0.07	0.342
Solyc06g060830	Homeobox-leucine zipper protein HAT2	HB-HD-ZIP					8.478	4.359	5.2385	4.696		3.87167	11.6977	9.042	8.672
Solyc06g072310	Homeobox-leucine zipper protein ROC8	HB-HD-ZIP	HDZIV9	[83]	AT1G73360	EDT1-ATHDG11-HDG11-AtEDT1	1.671	2.018	1.286	1.045		1.28867	1.45067	1.60133	0.922333
Solyc07g041850	Homeobox-leucine zipper protein HDG2	HB-HD-ZIP	HDZIV5	[83]
Solyc07g054380	Homeobox-leucine zipper protein HAT14	HB-HD-ZIP
Solyc08g007270	homeobox-leucine zipper protein HAT4-like	HB-HD-ZIP			AT3G60390/AT5G47370	HAT3/HAT2	18.3855	5.689	1.4295	1.654		6.85267	14.4317	8.02	8.58
Solyc08g066500	Homeobox leucine-zipper protein	HB-HD-ZIP			AT4G32880	ATHB-8-ATHB8-HB-8-	78.7425	54.401	42.312	57.536		113.273	81.8933	120.933	140.871
Solyc08g076370	Homeobox-leucine zipper protein ROC3	HB-HD-ZIP	HDZIV10	[83]	AT5G46880	HDG5-HB-7	5.256	11.962	12.638	5.7915		5.402	7.26533	6.01767	5.24433
Solyc08g078300	Homeobox-leucine zipper protein HAT4	HB-HD-ZIP			AT4G16780	ATHB2-ATHB-2-HAT4-HB-2	11.7125	9.193	3.0095	2.993		17.5337	16.9763	26.6637	29.8723
Solyc08g083130	Homeobox-leucine zipper protein HOX6	HB-HD-ZIP					6.1805	0.319	2.1545	10.968		6.863	0.349	1.65133	12.734
Solyc09g008810	homeobox-leucine zipper protein ATHB-22	HB-HD-ZIP			AT5G03790	ATHB51-LMI1-HB51-
Solyc09g066030	homeobox-leucine zipper protein ROC8	HB-HD-ZIP	HDZIV12	[83]			0.309	0.038	0.727	1.183		0.0316667	0.117333	0.160667	0.0106667
Solyc10g005330	Homeobox-leucine zipper protein MERISTEM L1	HB-HD-ZIP	HDZIV7	[83]	AT1G05230/AT4G04890/AT4G21750	HDG2/PDF2/ATML1	37.539	28.3895	22.715	17.613		30.7817	24.0953	17.5073	15.1883
Solyc10g018000	homeobox-leucine zipper protein ROC8	HB-HD-ZIP	HDZIV11	[83]
Solyc10g080540	Homeobox-leucine zipper protein HOX27	HB-HD-ZIP			AT5G06710	HAT14	5.8815	7.196	3.9485	4.4915		4.41167	5.723	11.3393	15.252
Solyc11g010270	Homeobox-leucine zipper protein HOX4	HB-HD-ZIP			AT2G22430/AT5G65310	HB6-ATHB6/HB5-ATHB-5-ATHB5-	209.434	330.83	463.087	334.317		131.088	265.946	300.581	266.039
Solyc11g011940	homeobox-leucine zipper protein ROC8	HB-HD-ZIP	HDZIV13	[83]
Solyc11g069470	Homeobox leucine-zipper protein	HB-HD-ZIP			AT5G60690	IFL-REV-AVB1-IFL1	97.46	41.535	32.0855	43.0825		98.0057	78.2327	105.087	127.569
Solyc12g005830	Homeobox-leucine zipper protein ROC2	HB-HD-ZIP	HDZIV6	[83]
Solyc12g044410	Homeobox leucine-zipper protein	HB-HD-ZIP			AT1G52150	ATHB15-CNA-ICU4-ATHB-15	171.975	143.136	137.141	162.678		144.154	103.52	140.894	178.266
Solyc01g100510	knotted 4	HB-KNOX			AT1G23380/AT1G70510	KNAT6L-KNAT6-KNAT6S/KNAT2-ATK1	23.996	19.3605	14.406	17.0095		13.846	17.2153	11.2743	14.339
Solyc02g081120	class 1 knotted-like homeodomain protein	HB-KNOX	STM		AT1G62360	WAM-BUM1-BUM-WAM1	91.105	120.278	117.899	115.155		7.34933	4.54867	5.51533	12.2897
Solyc04g077210	Knotted 1	HB-KNOX			AT4G08150	BP1-KNAT1-BP-	92.9015	84.5235	43.504	40.9235		124.016	99.4503	102.285	91.3907
Solyc07g007120	class II knotted-like homeodomain protein	HB-KNOX			AT5G11060/AT5G25220	KNAT4/KNAT3	63.1225	179.74	250.99	297.728		65.38	98.2137	74.7417	122.018
Solyc08g041820	Homeobox protein knotted-1-like 3-like	HB-KNOX			AT5G11060/AT5G25220	KNAT4/KNAT3	15.367	30.5965	35.762	39.064		25.42	22.3797	18.899	27.2703
Solyc08g080120	LEU76410 homeobox 2	HB-KNOX			AT1G62990	KNAT7-IRX11	3.4635	6.9675	7.6045	10.2325		6.617	10.257	10.5847	13.6677
Solyc12g010410	Homeobox protein knotted-1-like 3	HB-KNOX					0.674	3.6585	4.6965	5.812		7.70967	21.0257	10.4323	31.2953
Solyc02g062960	Homeobox-leucine zipper protein HOX14	HB-other					2.789	0.122	0.1895	0.521		0.617667	0.057	0.0583333	0.336
Solyc02g077590	Homeobox-leucine zipper-like protein	HB-other			AT5G53980	ATHB52-HB52	248.827	6.758	5.8225	6.4345		10.9257	3.77667	4.565	5.777
Solyc02g077660	Homeobox domain-containing protein/DDT domain-containing protein	HB-other			AT1G28420	RLT1-HB-1	73.53	66.48	77.54	71.0395		83.7273	73.549	76.075	86.952
Solyc02g085630	Homeobox-leucine zipper protein ATHB-21	HB-other			AT4G36740	HB-5-HB40-ATHB40-	0.0095	0.047	0.1045	0.0385		14.58	3.03133	13.6927	30.3
Solyc03g034110	Homeobox-leucine zipper protein HOX14	HB-other
Solyc03g034120	Homeobox-leucine zipper protein HOX14	HB-other					0.379	0.033	0.586	0.6355		0.150333	0.051	0.143333	0.299
Solyc03g034130	Homeobox-leucine zipper protein HOX14	HB-other
Solyc03g034150	Homeobox-leucine zipper protein HOX14	HB-other
Solyc05g005090	LEU76408 knotted 3	HB-other					21.2935	20.3295	14.8385	18.4035		39.8393	15.008	17.2677	19.036
Solyc07g053610	Homeobox domain-containing protein/DDT domain-containing protein	HB-other			AT5G44180	RLT2	92.6985	59.276	72.3235	74.0445		78.4423	51.732	70.0687	104.194
Solyc07g062790	Homeobox-leucine zipper protein HOX6	HB-other			AT5G53980	ATHB52-HB52	8.853	0.568	0.036	0.1025		0.044	0.142	0.0963333	0.557333
Solyc08g062530	Homeobox-leucine zipper protein HDG11	HB-other
Solyc09g057550	Homeobox-leucine zipper protein HDG2	HB-other
Solyc09g058993	Homeobox-leucine zipper protein HDG11	HB-other
Solyc09g060160	Homeobox-leucine zipper protein HDG11	HB-other
Solyc10g150101	Homeobox-leucine zipper protein HOX6	HB-other
Solyc02g072000	Heat shock transcription factor	HSF	HSF1		AT4G18880	AT-HSFA4A-HSFA4A	15.7545	21.67	42.316	29.0605		23.2627	17.7927	20.3613	23.9957
Solyc02g072060	Heat shock transcription factor	HSF	HSF2
Solyc02g078340	Heat stress transcription factor B-2b	HSF	HSF3				0	1.781	3.5635	1.8125		0.723333	1.404	0.484333	0.401
Solyc02g079180	Heat shock transcription factor	HSF	HSF4				0.203	0.9305	0.9755	0.6195		1.46733	0.414	0.366	0.261667
Solyc02g090820	Heat stress transcription factor B-1	HSF	HSF5		AT4G36990	ATHSF4-TBF1-AT-HSFB1-HSF4	33.4665	34.4925	59.263	61		161.007	155.008	84.4793	113.471
Solyc03g006000	Heat shock transcription factor	HSF	HSF6		AT4G18880	AT-HSFA4A-HSFA4A	24.3335	12.371	14.0975	14.973		22.7293	14.8727	13.531	22.554
Solyc03g026020	Heat shock transcription factor	HSF	HSF7		AT5G62020	HSFB2A-AT-HSFB2A	190.971	39.3355	52.7305	68.591		88.2117	40.8873	52.045	82.4553
Solyc03g097120	Heat stress transcription factor A-1	HSF	HSF8		AT5G16820	HSFA1B-HSF3-ATHSF3-ATHSFA1B	15.128	16.6215	24.439	22.701		43.1237	30.9727	23.8687	31.7977
Solyc04g016000	Heat shock transcription factor protein 8	HSF	HSF9		AT2G41690	HSFB3-AT-HSFB3	0.0325	43.005	11.0595	5.645		7.29533	47.408	15.8877	23.0387
Solyc04g078770	Heat stress transcription factor B-4	HSF	HSF10		AT1G46264	AT-HSFB4-HSFB4-SCZ-	7.949	4.875	7.59	12.4345		3.14567	6.379	13.4473	14.2797
Solyc06g053960	Heat shock transcription factor	HSF	HSF11				1.632	13.0195	4.5535	10.3485		2.91733	32.744	18.835	20.042
Solyc06g072750	Heat stress transcription factor A-1	HSF	HSF12		AT5G16820	HSFA1B-HSF3-ATHSF3-ATHSFA1B	5.747	9.1685	8.104	8.4125		5.61367	8.21567	6.60467	8.57067
Solyc07g040680	Heat shock transcription factor	HSF	HSF13				8.6835	4.227	3.7595	21.055		33.0043	4.329	6.98467	14.922
Solyc07g055710	Heat stress transcription factor A-5	HSF	HSF14				5.6155	6.879	3.0885	4.537		73.8577	7.94133	3.84733	11.778
Solyc08g005170	Heat shock factor protein HSF8	HSF	HSF15		AT1G32330	ATHSFA1D-HSFA1D	31.3065	28.4545	30.7455	32.8785		22.583	29.154	33.7113	38.5437
Solyc08g062960	Heat shock transcription factor	HSF	HSF16		AT2G26150	ATHSFA2-HSFA2	12.5925	1.112	7.7515	8.6365		6.331	4.321	13.731	14.0843
Solyc08g076590	Heat shock factor protein HSF8	HSF	HSF17		AT5G16820	HSFA1B-HSF3-ATHSF3-ATHSFA1B	8.6665	14.7895	9.934	10.243		11.3127	13.341	13.6697	13.0077
Solyc08g080540	Heat stress transcription factor B-2b	HSF	HSF18		AT4G11660	HSFB2B-HSF7-AT-HSFB2B-	9.3735	0.8945	6.9085	10.627		38.3807	5.99033	11.094	15.496
Solyc09g009100	Heat stress transcription factor A3	HSF	HSF19		AT5G03720	HSFA3-FGT3-AT-HSFA3-	48.0135	20.798	44.0345	47.263		32.8643	25.1453	31.822	50.6103
Solyc09g059520	Heat stress transcription factor A-8	HSF	HSF20		AT1G67970	HSFA8-ATHSFA8-AT-HSFA8-	20.0635	28.3295	19.2665	25.6425		47.645	27.6317	19.743	24.2837
Solyc09g065660	Heat shock transcription factor	HSF	HSF21		AT3G22830	HSFA6B-AT-HSFA6B	4.668	0.103	10.219	3.7595		10.2673	0.451333	6.47167	3.972
Solyc09g082670	Heat shock transcription factor	HSF	HSF22		AT3G22830	HSFA6B-AT-HSFA6B	0.0285	1.294	0.2125	0.3325		1.441	1.679	1.74767	0.957
Solyc10g079380	Heat stress transcription factor B-3	HSF	HSF23		AT2G41690	HSFB3-AT-HSFB3
Solyc11g064990	Heat shock transcription factor	HSF	HSF24
Solyc12g007070	Heat shock transcription factor	HSF	HSF25		AT3G24520	AT-HSFC1-HSFC1	24.6705	23.7315	5.98	10.0855		6.86867	35.1947	24.2987	33.1247
Solyc12g098520	Heat stress transcription factor A-5	HSF	HSF26		AT4G13980	AT-HSFA5-HSFA5	89.0195	32.2355	36.035	40.1095		25.6337	28.5477	29.365	60.131
Solyc01g044520	LOB domain-containing protein	LBD
Solyc01g091400	LOB domain-containing protein 31	LBD	LBD19		AT2G45410/AT4G00210	LBD19/LBD31	0.038	0.5545	3.227	6.6485		0.300667	0.743667	1.65933	1.287
Solyc01g091420	LOB domain-containing protein 18	LBD	LBD18		AT2G45420	LBD18	0.6625	2.093	0.123	0.088		3.12967	0.797	3.15367	2.407
Solyc01g098220	LOB domain-containing protein 20	LBD	LBD20		AT3G03760	LBD20
Solyc01g107190	LOB domain-containing protein 38	LBD					39.211	9.8075	9.2275	22.324		25.1833	54.369	39.608	43.774
Solyc02g065150	LOB domain-containing protein 36	LBD	LBD36		AT5G66870	LBD36-ASL1	0	0.4815	2.3755	2.3075		0.398667	0.661	0.753333	2.50867
Solyc02g067800	LOB domain-containing protein	LBD			AT3G27650	LBD25	0.019	64.6375	29.2125	31.5105		5.28867	14.4433	10.208	12.7223
Solyc02g069440	LOB domain-containing protein 3	LBD			AT1G31320	LBD4	0.8485	0.534	0.2085	0.26		1.07867	0.75	2.05967	2.70567
Solyc02g077380	LOB domain protein	LBD
Solyc02g085910	LOB domain-containing protein	LBD			AT3G02550	LBD41	20.5715	11.102	5.5985	3.0645		15.254	18.0253	62.1427	54.6363
Solyc02g086480	LOB domain-containing protein	LBD	LBD25		AT3G27650	LBD25	0	0.79	13.2775	43.3045		4.473	6.61367	10.756	26.6193
Solyc02g087570	LOB domain-containing protein	LBD
Solyc02g090410	LOB domain-containing protein 36	LBD					0.29	1.5415	1.0295	1.4685		1.06967	0.784	2.38167	1.81633
Solyc02g092550	LOB domain-containing protein 38	LBD	A39,LBD37		AT5G67420	ASL39-LBD37	140.411	101.603	47.1725	44.696		45.8847	37.9263	11.394	22.1087
Solyc03g063140	LOB domain-containing protein	LBD
Solyc03g095940	LOB domain-containing protein 21	LBD	LBD21		AT3G11090	LBD21	32.245	102.377	98.553	100.486		46.5553	25.8473	24.8757	20.5083
Solyc03g112430	LOB domain-containing protein	LBD	LOB		AT5G63090	LOB	0.1905	0.0185	1.6745	7.0825		0.069	0.0126667	0.172333	0.154
Solyc03g113360	LOB domain-containing protein 22	LBD	LBD27		AT3G47870	LBD27-SCP-ASL29-
Solyc03g119530	LOB domain-containing protein 41	LBD					120.941	172.429	73.9855	87.7785		299.151	154.924	194.796	219.109
Solyc04g050010	LOB domain-containing protein	LBD					6.548	0.489	0.224	0.048		0.140333	0.227667	0.0643333	0.0243333
Solyc04g077990	LOB domain-containing protein 37	LBD					97.943	74.0765	60.451	107.867		72.0693	46.4657	50.0433	92.9117
Solyc05g009320	LOB domain-containing protein 40	LBD			AT1G68510	LBD42	0.405	1.283	0.294	0.321		1.095	6.94067	31.1337	14.555
Solyc05g048740	LOB domain-containing protein	LBD	LBD11		AT1G07900/AT2G28500	LBD1/LBD11
Solyc06g005090	LOB domain-containing protein	LBD	LBD1		AT1G07900/AT2G28500	LBD1/LBD11	0.0515	28.1045	7.1955	3.1545		3.24667	11.9773	10.559	6.91433
Solyc06g007390	LOB domain-containing protein 15	LBD					0	0.9375	0.755	0.5835		0.304333	0.528333	2.372	2.42233
Solyc06g050430	LOB domain-containing protein 15	LBD	LBD15		AT2G40470	LBD15-ASL11	3.5385	3.9405	0.1045	0.337		4.662	0.774	5.55333	3.87233
Solyc06g050950	LOB domain-containing protein	LBD
Solyc06g062630	LOB domain-containing protein 27	LBD	LBD22		AT3G13850	LBD22	0.456	0.6755	0.458	0.4025		0.256667	0.53	0.426667	0.309333
Solyc06g064540	LOB domain-containing protein	LBD	LBD23/LBD24		AT3G26620/AT3G26660	LBD23/LBD24
Solyc06g071660	LOB domain-containing protein	LBD			AT5G63090	LOB	0	0.0095	0	0.2905		0.150667	0	0.259667	1.53433
Solyc06g075330	LOB domain-containing protein 1	LBD					2.885	3.221	1.2075	1.425		31.7367	2.628	0.981	0.781333
Solyc06g082310	LOB domain-containing protein	LBD	LBD12		AT2G30130	PCK1-ASL5-LBD12-	0	0.0285	0.016	0		2.54133	1.587	5.79733	2.373
Solyc06g082430	LOB domain-containing protein 15	LBD					0	0.1455	0.307	0.363		0.448333	0.64	2.16467	2.09
Solyc06g082770	LOB domain-containing protein 4	LBD					4.1975	96.3485	38.4395	15.076		12.6297	23.4373	8.498	6.11933
Solyc06g083930	LOB domain-containing protein	LBD					0.0455	0.019	0	0.0205		0.0783333	2.04633	0.786667	0.216667
Solyc08g065130	LOB domain-containing protein 22	LBD	LBD22		AT3G13850	LBD22
Solyc09g010485	LOB domain-containing protein	LBD	LBD26		AT3G27940	LBD26
Solyc09g010490	LOB domain-containing protein	LBD	LBD26		AT3G27940	LBD26
Solyc09g010495	LOB domain-containing protein	LBD
Solyc09g014648	LOB domain-containing protein	LBD			AT3G27940	LBD26
Solyc09g014690	LOB domain-containing protein	LBD
Solyc09g014700	LOB domain-containing protein	LBD
Solyc09g066260	LOB domain-containing protein	LBD			AT2G42430	ASL18-LBD16	0	0	0	0		0.144333	1.04767	1.22	0.856667
Solyc09g066270	LOB domain-containing protein 20	LBD	LBD17		AT2G42440/AT3G58190	LBD17-ASL15/LBD29-ASL16	0.019	0	0	0.0095		1.19067	2.547	2.73567	5.22333
Solyc09g150107	LOB domain-containing protein 24-like	LBD
Solyc11g008830	LOB domain-containing protein 6	LBD	AS2		AT1G65620	AS2	0	0	0.008	0		0.044	0.028	0.584333	0.515
Solyc11g045530	LOB domain-containing protein	LBD					4.93	3.1445	3.7215	4.866		2.28833	5.89767	10.5177	12.327
Solyc11g072470	LOB domain-containing protein	LBD					0.0045	7.029	2.828	3.3315		2.59467	5.594	2.644	4.82133
Solyc12g010810	LOB domain-containing protein 2	LBD	LBD2		AT1G06280	LBD2
Solyc12g100150	LOB domain-containing protein 4	LBD			AT1G31320	LBD4	2.9595	7.2185	4.813	2.9105		0.588667	0.688	0.614667	0.537
Solyc01g060310	MADS-box transcription factor	MADS	MADS3-61	[95]
Solyc01g066500	Transcription factor, MADS-box	MADS	MADS5	[95]			0.4575	0.6095	0.1275	0.0515		0.247333	0.181	0.192	0.0536667
Solyc01g080785	Transcription factor, MADS-box	MADS
Solyc01g087990	MADS-box transcription factor	MADS			AT5G13790	AGL15	1.3315	0.338	0.5935	1.4525		2.943	1.44767	0.571667	1.24033
Solyc01g093960	MADS box transcription factor	MADS			AT2G45650	AGL6-RSB1
Solyc01g097850	Agamous-like MADS-box protein AGL61	MADS	MADS19	[95]			0.1825	2.0195	0.0745	0.053		0.207	0.143	0.445667	0.713
Solyc01g098050	Agamous-like MADS-box protein AGL61	MADS	MADS42	[95]
Solyc01g098060	Agamous-like MADS-box protein AGL21	MADS	MADS40	[95]			0.0095	0.038	0.036	0.105		12.5457	0.886	0.258	0.161333
Solyc01g098070	Agamous-like MADS-box protein AGL21	MADS	MADS39	[95]
Solyc01g102260	Agamous-like MADS-box protein AGL80	MADS	MADS67	[95]	AT5G48670	FEM111-AGL80
Solyc01g103550	Transcription factor, MADS-box	MADS	MADS60	[95]	AT5G55690	AGL47
Solyc01g106700	MADS-box transcription factor 23	MADS	MADS51	[95]			4.302	3.723	0.905	1.0055		4.309	1.83733	1.21133	1.43133
Solyc01g106710	Transcription factor, MADS-box	MADS	MADS29	[95]	AT5G60440	AGL62
Solyc01g106720	Agamous-like MADS-box protein AGL62	MADS	MADS32	[95]	AT5G60440	AGL62
Solyc01g106730	MADS-box transcription factor	MADS	MADS33	[95]
Solyc02g065730	MADS box transcription factor	MADS
Solyc02g071730	Tomato AGAMOUS 1	MADS			AT4G18960	AG	0.6935	0.188	0.9025	3.787		0.119333	0.313	0.161333	0.212333
Solyc02g084630	TDR6 transcription factor	MADS					40.577	14.439	8.632	9.1105		41.5663	8.054	10.6347	14.2683
Solyc02g089200	TM29	MADS			AT3G02310/AT5G15800	AGL4-2/AGL2-1
Solyc02g089210	MADS box transcription factor	MADS
Solyc02g091550	MADS box transcription factor AGAMOUS	MADS			AT2G22630/AT3G57230/AT4G37940	AGL17/AGL16/AGL21	1.083	0.3235	0.3085	0.216		0.57	0.554	0.991667	0.616
Solyc03g006830	MADS-box transcription factor	MADS			AT2G45660/AT5G62165	AGL20-SOC1-ATSOC1/AGL42-FYF
Solyc03g019710	LETDR8	MADS
Solyc03g033880	Agamous-like MADS-box protein AGL61	MADS
Solyc03g033900	Agamous-like MADS-box protein AGL61	MADS
Solyc03g033940	Agamous-like MADS-box protein AGL61	MADS
Solyc03g034260	Agamous-like MADS-box protein AGL61	MADS	MADS20	[95]
Solyc03g062820	Transcription factor, MADS-box	MADS	MADS41	[95]
Solyc03g114830	FRUITFULL-like MADS-box 2	MADS			AT5G60910	FUL-AGL8	0.1575	0.3	0.107	0.493		0.651667	0.188333	1.279	2.91867
Solyc03g114840	MADS-box protein 1	MADS			AT2G03710	AGL3
Solyc04g005320	MADS box transcription factor	MADS					0.8695	0.498	0.1135	0.241		0.125333	0.0453333	0.0713333	0.033
Solyc04g025030	MADS-box transcription factor	MADS	MADS30	[95]
Solyc04g025110	MADS-box transcription factor	MADS	MADS31	[95]
Solyc04g047870	MADS-box transcription factor	MADS	MADS34	[95]
Solyc04g054527	MADS-box transcription factor	MADS
Solyc04g054533	MADS-box transcription factor	MADS
Solyc04g054684	Transcription factor, MADS-box	MADS
Solyc04g054688	MADS-box transcription factor	MADS
Solyc04g056550	Agamous-like MADS-box protein AGL61	MADS	MADS12	[95]
Solyc04g056740	Agamous-like MADS-box protein AGL61	MADS	MADS13	[95]
Solyc04g064860	MADS-box transcription factor 23	MADS	MADS10	[95]			1.135	1.5745	0.914	0.915		1.07833	1.221	0.62	0.787
Solyc04g081000	Deficiens	MADS			AT3G54340	AP3-ATAP3
Solyc05g012020	ripening inhibitor	MADS			AT2G03710	AGL3	2.2695	1.2115	0.7205	1.636		0.244333	0.247	0.147667	0.455
Solyc05g013370	MADS-box protein	MADS	MADS43	[95]			0.7325	1.9205	0.448	0.6415		0.964333	0.721	0.250667	0.274667
Solyc05g015720/Solyc05g015730-R	agamous-like MADS-box protein AGL27	MADS			AT1G77080/AT5G65050/AT5G65060/AGL31/	AGL27/AGL31/FCL3
Solyc05g015750	SEPALLATA3	MADS			AT1G24260	AGL9-3-Sep
Solyc05g056620	macrocalyx	MADS			AT1G26310/AT1G69120	CAL1-AGL10-CAL/AP1-AtAP1-AGL7-
Solyc06g033820	MADS-box transcription factor	MADS	MADS73	[95]
Solyc06g048380	MADS-box transcription factor	MADS	MADS71-72	[95]
Solyc06g054680	Agamous-like MADS-box protein AGL61	MADS	MADS14	[95]
Solyc06g059780	Agamous-like MADS-box protein AGL61	MADS	MADS15	[95]
Solyc06g059970	TPI	MADS			AT5G20240	PI	0.508	1.8195	0.493	0.505		2.65633	1.55367	0.891667	1.37233
Solyc06g069430	FRUITFULL-like MADS-box 1	MADS			AT5G60910	FUL-AGL8	0.2985	3.87	5.834	13.7465		4.828	4.38167	14.6787	19.606
Solyc06g071300	AGAMOUS-like 98	MADS	MADS8	[95]	AT4G02235	AGL51	0.3375	0.649	0.454	0.5015		0.583	0.495667	0.547	0.438333
Solyc07g052700	MADS-box transcription factor	MADS	MADS49-75	[95]			44.093	39.8575	28.132	30.5025		48.5207	19.1803	16.1777	17.0453
Solyc07g052720	MADS-box transcription factor	MADS					30.0435	31.659	14.601	18.962		15.256	9.58067	7.096	9.43267
Solyc07g055920	Tomato AGAMOUS-like 1	MADS
Solyc08g067230	MADS-box transcription factor	MADS
Solyc08g080100	MADS box transcription factor AGAMOUS	MADS			AT4G11880/AT4G22950	AGL14-XAL2/GL19-AGL19
Solyc09g061950	MADS-box transcription factor	MADS	MADS28	[95]
Solyc10g012180	agamous-like MADS-box protein AGL62	MADS	MADS35	[95]
Solyc10g012200	agamous-like MADS-box protein AGL62	MADS	MADS36	[95]
Solyc10g012380	agamous-like MADS-box protein AGL62	MADS	MADS53	[95]
Solyc10g018070	MADS-box transcription factor	MADS	MADS21	[95]
Solyc10g018080	Agamous-like MADS-box protein AGL61	MADS	MADS22	[95]
Solyc10g018110	MADS-box transcription factor	MADS	MADS23	[95]
Solyc10g044965	MADS box transcription factor AGAMOUS	MADS
Solyc10g050900	Agamous-like MADS-box protein AGL61	MADS	MADS17	[95]
Solyc10g050940	Agamous-like MADS-box protein AGL61	MADS	MADS18	[95]
Solyc10g050950	Agamous-like MADS-box protein AGL61	MADS	MADS16	[95]
Solyc10g080030	MADS-box transcription factor	MADS
Solyc11g005120	MADS box transcription factor	MADS			AT5G23260	TT16-ABS-AGL32-
Solyc11g010570	jointless	MADS			AT2G22540	AGL22-FAQ1-SVP-	55.7715	18.003	11.526	18		35.2917	9.246	16.3133	18.57
Solyc11g020320	MADS-box transcription factor	MADS	MADS59	[95]	AT5G55690	AGL47
Solyc11g020620	MADS-box transcription factor	MADS	MADS57	[95]	AT5G55690/AT3G18650	AGL47/AGL103
Solyc11g020660	MADS-box transcription factor	MADS	MADS58	[95]	AT5G55690/AT1G35560	AGL47/TCP23-AtTCP23
Solyc11g028020	Tomato AGAMOUS like 11	MADS			AT4G09960	STK-AGL11
Solyc11g032100	Tomato AGAMOUS 12	MADS			AT1G71692	XAL1-AGL12	19.159	7.617	2.939	2.809		7.57367	6.791	4.774	5.244
Solyc11g045310	Transcription factor, MADS-box	MADS			AT2G03060	AGL30	9.815	11.67	13.7515	12.5365		11.0987	11.507	11.811	13.5613
Solyc11g069770	Agamous-like MADS-box protein AGL62	MADS	MADS50-55	[95]			0.2555	0.9675	0.729	1.518		0.0906667	0.0386667	0.160333	0.587333
Solyc12g016150	Agamous-like MADS-box protein AGL80	MADS	MADS64	[95]
Solyc12g016170	Agamous-like MADS-box protein AGL80	MADS	MADS62	[95]
Solyc12g016180	Agamous-like mads-box protein agl80-like	MADS	MADS63	[95]
Solyc12g017300	Agamous-like mads-box protein agl80-like	MADS	MADS65	[95]
Solyc12g038510	jointless-2	MADS			AT2G03710	AGL3
Solyc12g042015	MADS-box transcription factor	MADS
Solyc12g056460	MADS-box transcription factor	MADS					1.206	0.1645	0.173	0.3155		0.520667	0.165333	1.034	1.671
Solyc12g087830	MADS-box transcription factor	MADS			AT5G65060	AGL70-FCL3-MAF3-	3.3205	62.6735	14.42	15.9835		24.2103	8.478	2.331	4.52567
Solyc01g005660	R2R3MYB transcription factor 5	MYB	MYB5	[91]	AT3G13540	MYB5
Solyc01g009070	gamyb-like 1	MYB	MYB33	[91]	AT5G06100	MYB33	11.3625	19.979	14.632	13.336		8.96267	11.59	13.6393	17.5813
Solyc01g010910	MYB transcription factor	MYB	MYB16	[91]			0.057	0.705	0.294	0.2135		0.591667	0.219333	0.316667	0.250333
Solyc01g057910	R2R3MYB transcription factor 2	MYB	MYB78	[91]	AT3G06490/AT5G49620	MYB108/MYB78	1.2545	1.2765	0.688	1.7875		0.847333	0.827	0.673333	1.98733
Solyc01g079620	colorless fruit epidermis	MYB	MYB111	[91]	AT2G47460/AT5G49330	PFG1-ATMYB12-MYB12/PFG3-MYB111-ATMYB111-	3.0545	5.0215	6.2565	4.3535		1.007	1.984	1.682	2.08533
Solyc01g087130	R2R3MYB transcription factor 47	MYB	MYB46	[91]			1.3895	2.813	0.075	0.347		8.279	2.01067	6.08	7.43433
Solyc01g090530	R2R3MYB transcription factor 104	MYB	MYB120	[91]	AT3G60460	DUO1
Solyc01g094360	MYB transcription factor	MYB	MYB99	[91]	AT3G61250	LMI2-MYB17-AtMYB17-	1.046	0.934	1.5015	2.384		0.514	0.604	1.305	0.405
Solyc01g102340	R2R3MYB transcription factor 61	MYB	MYB55	[91]	AT1G09540	ATMYB61-MYB61	53.2785	27.959	23.7625	22.8715		32.6557	28.1743	14.6277	11.0547
Solyc01g111500	R2R3MYB transcription factor 7	MYB	MYB8	[91]	AT2G16720/AT4G34990/AT4G38620	ATMYB7-MYB7-ATY49/AtMYB32-MYB32/MYB4-ATMYB4	4.9355	13.4405	4.3075	8.6485		4.069	10.18	10.0037	15.41
Solyc02g067340	R2R3MYB transcription factor 96	MYB	MYB96	[91]			14.719	22.525	10.114	8.9585		14.405	3.27967	4.313	3.55933
Solyc02g067760	R2R3MYB transcription factor 21	MYB	MYB24	[91]	AT3G27810/AT5G40350	MYB21-ATMYB21-ATMYB3/AtMYB24-MYB24
Solyc02g079280	MYB transcription factor	MYB	MYB74	[91]	AT4G21440	ATM4-ATMYB102-MYB102-	0.019	0.3095	0.9725	2.433		0.683667	2.862	2.62267	3.34367
Solyc02g082040	R2R3MYB transcription factor 56	MYB	MYB18	[91]	AT3G12720	MYB67-ATY53-ATMYB67-	0.0095	0.759	0.253	0.067		9.002	1.82433	3.19733	5.65367
Solyc02g087960	R2R3MYB transcription factor 94	MYB	MYB94	[91]			6.86	6.565	1.824	2.4695		6.013	1.12533	1.65067	1.02967
Solyc02g088190	MYB transcription factor	MYB	MYB106	[91]	AT3G01140/AT5G15310	MYB106-AtMYB106-NOK/MYB16-ATMIXTA-ATMYB16-	5.327	8.401	6.3965	8.8785		2.118	2.84733	3.317	2.892
Solyc02g089190	R2R3MYB transcription factor 29	MYB	MYB121	[91]	AT3G30210	MYB121-ATMYB121
Solyc02g091980	blind-like7	MYB	MYB87	[91]	AT3G49690/AT5G65790	RAX3-MYB84-ATMYB84/ATMYB68-MYB68	10.638	2.754	0.422	0.3295		3.25467	3.09467	2.80467	2.373
Solyc02g092930	R2R3MYB transcription factor 44	MYB	MYB73	[91]	AT4G37260/AT5G67300	ATMYB73-MYB73/MYBR1-ATMYBR1-ATMYB44-MYB44	90.8525	136.398	75.686	98.154		314.494	78.734	54.9623	68.9987
Solyc02g093740	R2R3MYB transcription factor 99	MYB	MYB85	[91]			14.0545	16.8075	5.378	3.7855		2.33433	4.811	4.61333	4.76933
Solyc03g005570	Myb-related transcription factor LBM2	MYB	MYB15	[91]			4.051	3.7135	0.7105	1.348		198.52	2.33367	1.367	2.52033
Solyc03g025870	R2R3MYB transcription factor 19	MYB	MYB45	[91]	AT5G52260	AtMYB19-MYB19	0.9995	1.743	0.6505	0.6785		0.38	0.592333	1.16333	1.412
Solyc03g059200	Myb-related protein	MYB	MYB35	[91]	AT3G28470	MYB35-ATMYB35-TDF1-
Solyc03g093890	R2R3MYB transcription factor 52	MYB	MYB58	[91]			0.2725	1.339	1.7805	1.9465		14.239	18.285	1.096	9.19567
Solyc03g093930	MYB transcription factor	MYB	MYB63	[91]
Solyc03g093940	R2R3MYB transcription factor 51	MYB	MYB81	[91]
Solyc03g096350	Transcription factor DIVARICATA	MYB		[91]	AT3G11280/AT5G05790		3.453	7.224	4.0695	3.7755		3.341	2.683	1.82467	1.81667
Solyc03g112390	R2R3MYB transcription factor 86	MYB	MYB19	[91]			6.9135	18.2795	18.5795	9.3775		25.8733	11.7707	14.3183	9.53867
Solyc03g112890	R2R3MYB transcription factor	MYB	MYB115	[91]	AT4G18770	AtMYB98-MYB98
Solyc03g116100	R2R3MYB transcription factor 31	MYB	MYB31	[91]	AT3G47600/AT5G62470	MYB94-ATMYBCP70-ATMYB94/MYB96-MYBCOV1-ATMYB96-	4.451	9.9725	3.684	3.554		7.182	7.37833	4.31133	3.35233
Solyc03g119050	SANT/Myb domain	MYB	MYB4R-1	[91]	AT3G18100	AtMYB4R1-MYB4R1	16.4665	23.918	19.801	20.0285		17.0513	22.8737	18.6537	17.4217
Solyc03g119370	R2R3MYB transcription factor 62	MYB	MYB116	[91]			0.3035	6.012	1.636	1.325		2.27533	3.32667	1.44367	2.66833
Solyc03g119740	Transcription factor DIVARICATA	MYB		[91]	AT1G49010	MYBS1	8.27	28.0105	14.59	14.8795		6.75433	10.4493	8.826	7.647
Solyc03g121740	R2R3MYB transcription factor 26	MYB	MYB26	[91]	AT3G13890	ATMYB26-MS35-MYB26-
Solyc04g005600	Transcription factor	MYB	MYB51	[91]
Solyc04g005710	R2R3MYB transcription factor 88	MYB	MYB100	[91]			2.2455	1.399	0.1515	0.321		2.374	0.0583333	1.693	1.657
Solyc04g008870	Transcription factor DIVARICATA	MYB		[91]	AT5G08520	MYBS2	24.24	11.4915	12.491	8.303		6.998	9.793	12.9083	11.197
Solyc04g009950	cell division cycle 5	MYB	MYB52	[91]	AT1G09770	ATCDC5-ATMYBCDC5-CDC5-	94.292	84.279	96.3335	110.937		78.6383	103.118	111.238	117.955
Solyc04g014470	R2R3MYB transcription factor 20	MYB	MYB43	[91]			1.0445	7.712	1.8615	3.7025		3.00167	3.69267	5.42567	6.14767
Solyc04g049120	Nuclear receptor corepressor 1	MYB		[91]	AT3G52250	PWR	115.221	91.683	98.5685	95.2975		87.906	91.444	95.5817	112.735
Solyc04g049740	MYB-RELATED transcription factor	MYB		[91]
Solyc04g050090	MYB-RELATED transcription factor	MYB		[91]
Solyc04g056310	MYB transcription factor	MYB	MYB53	[91]	AT5G10280/AT5G65230	MYB92-ATMYB92-ATMYB64/MYB53-AtMYB53	0	0	0.0175	0.3755		0.301	0.123333	0.498	3.949
Solyc04g064540	R2R3MYB transcription factor 115	MYB	MYB69	[91]	AT1G17950/AT1G73410	MYB52-BW52-ATMYB52/ATMYB54-MYB54	0.019	0.042	0	0.0735		0.492667	0.147667	0.158667	1.34567
Solyc04g074170	MYB transcription factor	MYB	MYB93	[91]	AT1G34670	AtMYB93-MYB93	0.0095	0.0095	0.0265	0.609		0.047	0.019	0.214667	2.30767
Solyc04g077260	blind-like3	MYB	MYB68	[91]	AT3G49690/AT5G65790	RAX3-MYB84-ATMYB84/ATMYB68-MYB68	2.5815	2.0615	1.6235	2.135		3.20967	3.748	9.83067	12.648
Solyc04g078420	R2R3MYB transcription factor 70	MYB	MYB70	[91]	AT4G37260	ATMYB73-MYB73	66.92	45.0855	83.338	99.6815		218.927	106.09	142.861	186.966
Solyc04g079360	R2R3MYB transcription factor 77	MYB	MYB77	[91]			16.695	8.534	1.6225	2.989		167.912	3.33867	4.02433	4.12067
Solyc05g007160	R2R3MYB transcription factor 110	MYB	MYB88	[91]	AT1G14350/AT2G02820	AtMYB124-FLP-MYB124/MYB88-AtMYB88	39.173	45.1635	36.7955	46.623		40.9283	44.119	49.4037	69.5347
Solyc05g007690	Transcription factor MYB39	MYB	MYB47	[91]
Solyc05g007710	MYB transcription factor	MYB	MYB95	[91]
Solyc05g007870	R2R3MYB transcription factor 117	MYB	MYB117	[91]	AT1G26780/AT1G69560	LOF1-AtMYB117-MYB117/MYB105-LOF2-ATMYB105-	0.2395	0.028	0.004	1.0645		0.472667	0.137667	0.135333	0.385
Solyc05g008250	R2R3MYB transcription factor 76	MYB	MYB6	[91]
Solyc05g009230	MYB transcription factor	MYB	MYB62	[91]	AT1G68320	BW62B-BW62C-AtMYB62-MYB62	2.091	1.2725	0.5225	0.8655		2.23833	0.378333	0.283	0.608333
Solyc05g013430	MYB-related transcription factor	MYB		[91]
Solyc05g014290	MYB-related transcription factor	MYB	MYB40	[91]	AT5G14340	MYB40-AtMYB40	0.3305	0	0	0		0.0596667	0.0373333	0.929	0.647
Solyc05g048830	MYB transcription factor	MYB	MYB17	[91]	AT3G61250	LMI2-MYB17-AtMYB17-	10.908	4.099	3.4255	3.9145		1.38633	1.545	1.808	2.32033
Solyc05g051550	MYB transcription factor	MYB	MYB92	[91]	AT5G10280	MYB92-ATMYB92-ATMYB64-	0.0095	0.019	0.008	0.5295		0.019	0	0.387333	2.25633
Solyc05g052850	R2R3MYB transcription factor 109	MYB	MYB109	[91]	AT3G55730	AtMYB109-MYB109	7.1835	6.5465	4.34	4.219		5.619	5.411	5.17633	6.62633
Solyc05g053150	R2R3MYB transcription factor 71	MYB	MYB79	[91]	AT3G24310	MYB305-ATMYB71
Solyc05g053330	Transcription factor	MYB	MYB2	[91]	AT1G48000	MYB112-AtMYB112	3.1315	3.324	1.769	2.241		2.09333	2.72067	1.93767	1.788
Solyc05g055030	R2R3MYB transcription factor 10	MYB	MYB10	[91]	AT1G06180	ATMYB13-ATMYBLFGN-MYB13-	0.057	8.51	3.3105	2.0905		1.689	14.9523	1.30167	3.00267
Solyc05g055240	I-box binding factor	MYB		[91]	AT5G04760	DIV2	20.674	14.402	14.591	14.575		9.70767	14.1447	14.219	17.788
Solyc06g005330	R2R3MYB transcription factor 59	MYB	MYB59	[91]	AT3G46130	MYB48-ATMYB48-ATMYB48-3-ATMYB48-2	0.9405	0.581	0.251	0.245		2.732	6.33267	1.39667	1.69033
Solyc06g009410	R2R3MYB transcription factor 57	MYB	MYB21	[91]
Solyc06g009480	R2R3MYB transcription factor 24	MYB	MYB22	[91]
Solyc06g009710	R2R3MYB transcription factor 111	MYB	MYB32	[91]	AT2G47460/AT5G49330	PFG1-ATMYB12-MYB12/PFG3-MYB111-ATMYB111
Solyc06g033870	R2R3MYB transcription factor 105	MYB	MYB118	[91]
Solyc06g034000	R2R3MYB transcription factor 95	MYB	MYB44	[91]
Solyc06g053610	R2R3MYB transcription factor 14	MYB	MYB9	[91]	AT3G23250	MYB15-ATY19-ATMYB15-	1.058	39.9975	13.514	9.39		5.49633	11.343	16.938	14.1917
Solyc06g065100	R2R3MYB transcription factor 3	MYB	MYB3	[91]	AT4G09460	MYB6-AtMYB6	62.801	20.444	8.9525	15.5775		10.843	21.042	10.667	14.968
Solyc06g069850	R2R3MYB transcription factor 30	MYB	MYB30	[91]	AT3G28910	MYB30-ATMYB30	2.0645	3.818	2.755	2.571		2.9	4.17533	2.91433	5.30233
Solyc06g071520	Myb-related protein A	MYB	MYB98	[91]	AT4G18770	AtMYB98-MYB98
Solyc06g071690	R2R3MYB transcription factor 50	MYB	MYB86	[91]			0.1325	17.8415	11.7015	7.9815		4.61667	2.71467	5.246	4.77833
Solyc06g073640	GAMYB-like2	MYB	MYB65	[91]	AT3G11440	MYB65-ATMYB65	2.5325	3.509	3.6225	3.932		7.718	3.174	3.916	3.392
Solyc06g074910	potato leaf	MYB	MYB105	[91]	AT2G36890/AT5G23000	RAX2-MYB38-BIT1-ATMYB38/ATMYB37-RAX1-MYB37	0	0	0	0.743		0.0126667	0.0196667	0.219333	0.529
Solyc06g074920	blind-like6	MYB	MYB50	[91]
Solyc06g076770	Transcription factor DIVARICATA	MYB		[91]	AT5G58900	DIV1	43.696	45.452	22.0355	18.603		25.8757	21.3737	16.744	16.134
Solyc06g076840	R2R3MYB transcription factor 119	MYB	MYB119	[91]	AT5G58850	MYB119-ATMYB119
Solyc06g083900	R2R3MYB transcription factor 13	MYB	MYB14	[91]	AT1G06180	ATMYB13-ATMYBLFGN-MYB13-	0.019	3.498	18.12	7.8065		9.87733	3.478	6.95033	2.43733
Solyc07g006750	blind-like8	MYB	MYB84	[91]	AT5G57620	AtMYB36-MYB36	3.3995	10.0405	1.276	0.7155		4.65033	4.731	13.9507	20.3233
Solyc07g008010	R2R3MYB transcription factor 82	MYB	MYB82	[91]	AT5G52600	AtMYB82-MYB82	66.9335	24.8595	7.036	8.7695		4.20067	3.61467	9.14633	7.415
Solyc07g052300	R2R3MYB transcription factor 101	MYB	MYB101	[91]	AT2G32460	ABS7-MYB101-ATM1-ATMYB101	0.3935	0.146	0.3155	0.3045		0.420333	0.146667	0.383333	0.265333
Solyc07g053230	R2R3MYB transcription factor 83	MYB	MYB34	[91]			0.5565	0.094	0.0185	0.04		43.5237	0.439667	0.057	0.924667
Solyc07g053240	R2R3MYB transcription factor 81	MYB	MYB76	[91]
Solyc07g054840	R2R3MYB transcription factor 41	MYB	MYB41	[91]	AT4G28110	MYB41-AtMYB41	0	0.0095	0	0.417		0.0973333	0.120333	0.548667	1.53167
Solyc07g054960	R2R3MYB transcription factor 66	MYB	MYB25	[91]
Solyc07g054980	R2R3MYB transcription factor 85	MYB	MYB29	[91]
Solyc07g055000	R2R3MYB transcription factor 72	MYB	MYB122	[91]
Solyc08g005870	R2R3MYB transcription factor 8	MYB	MYB89	[91]			0.123	0.094	0.0265	0.7205		0.985	0	0.0863333	0.0866667
Solyc08g008480	R2R3MYB transcription factor 4	MYB	MYB7	[91]
Solyc08g065910	blind-like5	MYB	MYB36	[91]
Solyc08g068320	Myb	MYB	MYB3R-1	[91]	AT4G32730	ATMYB3R-1-MYB3R-1-PC-MYB1-MYB3R1	11.6115	9.842	18.7725	24.117		24.1	13.1347	55.619	31.739
Solyc08g076700	R2R3MYB transcription factor 107	MYB	MYB39	[91]
Solyc08g076710	R2R3MYB transcription factor 39	MYB	MYB107	[91]			0	0.0565	0.037	0.4545		0.0563333	0.0436667	0.679667	4.11333
Solyc08g079270	R2R3MYB transcription factor 42	MYB	MYB42	[91]	AT4G12350/AT4G22680	AtMYB42-MYB42/MYB85-AtMYB85	0.976	1.036	0.232	0.6545		3.93	0.592333	3.12067	6.054
Solyc08g080580	Myb	MYB	MYB3R-2	[91]			2.643	2.947	6.441	5.6205		5.31333	3.81367	7.90267	6.08333
Solyc08g081500	LETHM1	MYB	MYB103	[91]	AT1G63910	AtMYB103-MYB103	0.0095	0.1975	0.0345	0.0095		3.13933	0.402333	1.55567	2.501
Solyc08g082890	R2R3MYB transcription factor 9	MYB	MYB66	[91]
Solyc09g008250	blind-like1	MYB	MYB37	[91]	AT2G36890/AT5G23000	RAX2-MYB38-BIT1-ATMYB38/ATMYB37-RAX1-MYB37-	2.9435	13.3165	8.162	5.945		3.239	16.3523	16.3083	24.978
Solyc09g008390	R2R3MYB transcription factor 22	MYB	MYB27	[91]	AT3G53200	AtMYB27-MYB27
Solyc09g010820	Myb-related protein 3R-1	MYB	MYB3R-3	[91]	AT3G09370/AT5G02320	MYB3R-3-AtMYB3R3/ATMYB3R5-MYB3R-5	13.8085	11.165	10.9665	12.2735		12.365	10.2727	13.7097	13.9997
Solyc09g010840	phantastica	MYB	MYB91	[91]	AT2G37630	ATMYB91-LL2-AS1-ATPHAN	22.6335	38.6695	55.465	76.736		43.2327	18.633	23.6663	17.949
Solyc09g011780	R2R3MYB transcription factor 1	MYB	MYB1	[91]	AT3G09230	SRM1-AtMYB1-MYB1-	4.355	3.4245	4.2835	3.912		5.803	4.74	4.78067	4.421
Solyc09g014250	Transcription factor DIVARICATA	MYB		[91]	AT2G38090		41.094	67.7285	34.223	14.907		18.0697	60.3537	30.3813	16.1903
Solyc09g055650	R2R3MYB transcription factor 100	MYB	MYB64	[91]	AT3G27785/AT5G58850	MYB118-ATMYB118-PGA37/MYB119-ATMYB119
Solyc09g090130	R2R3MYB transcription factor 15	MYB	MYB13	[91]	AT3G23250	MYB15-ATY19-ATMYB15-	17.152	19.671	5.3765	5.6385		167.436	8.39633	7.54033	12.5247
Solyc09g090790	R2R3MYB transcription factor 79	MYB	MYB71	[91]	AT3G24310	MYB305-ATMYB71	0	0.0185	0.028	0.064		0.978333	0.101667	0.414333	5.16133
Solyc10g005240	R2R3MYB transcription factor 67	MYB	MYB67	[91]	AT3G12720	MYB67-ATY53-ATMYB67-	0	0	0.0185	0.4515		0.0906667	0.0133333	0.258667	2.82833
Solyc10g005460	MYB transcription factor	MYB	MYB49	[91]			0.061	0.676	0.3965	1.9325		0.426667	0.906	1.11633	2.32467
Solyc10g005550	R2R3MYB transcription factor 63	MYB	MYB72	[91]	AT1G16490/AT1G56160	MYB58-ATMYB58/ATMYB72-MYB72
Solyc10g005760	R2R3MYB transcription factor 80	MYB	MYB80	[91]	AT5G56110	MS188-AtMYB103-MYB103-MYB80
Solyc10g008700	R2R3MYB transcription factor 49	MYB	MYB102	[91]			0	15.0145	3.7685	0.8605		0.088	2.38167	0.102333	1.09167
Solyc10g019260	R2R3MYB transcription factor 120	MYB	MYB97	[91]	AT3G60460	DUO1
Solyc10g044680	R2R3MYB transcription factor 55	MYB	MYB61	[91]	AT1G09540	ATMYB61-MYB61
Solyc10g055410	R2R3MYB transcription factor 32	MYB	MYB4	[91]	AT4G34990/AT4G38620	AtMYB32-MYB32/MYB4-ATMYB4	18.844	24.3055	18.0805	43.734		17.2613	36.3843	21.4427	34.3067
Solyc10g076820	Transcription factor DIVARICATA	MYB		[91]			1.338	4.909	1.4295	0.5255		1.19667	2.4	1.76133	0.488667
Solyc10g081320	R2R3MYB transcription factor 69	MYB	MYB56	[91]			0.461	23.324	24.248	21.673		5.66033	19.7207	18.5193	14.489
Solyc10g081490	R2R3MYB transcription factor 60	MYB	MYB60	[91]	AT1G08810	AtMYB60-MYB60	1.454	2.7645	1.6845	1.959		2.59667	2.23567	2.09767	1.32633
Solyc10g083900	R2R3MYB transcription factor 27	MYB	MYB54	[91]			0.619	7.1525	3.2125	0.8265		0.632	2.48667	0.411667	0.908667
Solyc10g086250	R2R3MYB transcription factor 75	MYB	MYB90	[91]	AT1G56650/AT1G66370/AT1G66380/AT1G66390	SIAA1-AtPAP1-MYB75-ATMYB75/MYB113-AtMYB113/AtMYB114-MYB114/ATMYB90-MYB90-PAP2	0.019	17.909	24.588	4.3755		3.67967	6.59867	8.77033	1.93567
Solyc10g086260	anthocyanin 1	MYB	MYB114	[91]	AT1G66370/AT1G66380/AT1G66390	MYB113-AtMYB113/AtMYB114-MYB114/ATMYB90-MYB90-PAP2-
Solyc10g086270	R2R3MYB transcription factor 28	MYB	MYB113	[91]	AT1G56650/AT1G66370/AT1G66380/AT1G66390	MYB113-AtMYB113/AtMYB114-MYB114/ATMYB90-MYB90-PAP2-	0	2.325	0.777	0.275		0.244	0.322	0.830667	0.323333
Solyc10g086290	R2R3MYB transcription factor 114	MYB	MYB75	[91]	AT1G56650/AT1G66370/AT1G66380/AT1G66390	MYB113-AtMYB113/AtMYB114-MYB114/ATMYB90-MYB90-PAP2-
Solyc11g006720	Transcription factor DIVARICATA	MYB			AT5G04760	DIV2	51.1015	5.613	5.8735	32.0645		34.8513	20.8363	7.39167	20.031
Solyc11g011050	R2R3MYB transcription factor 43	MYB	MYB20		AT1G66230/AT5G16600	MYB20-AtMYB20/AtMYB43-MYB43	1.215	8.6355	2.089	1.807		12.5267	12.9133	8.39067	11.279
Solyc11g065840	R2R3MYB transcription factor 46	MYB	MYB83		AT3G08500	AtMYB83-MYB83	0.348	1.387	0.037	0.384		2.71767	1.17167	2.47467	2.85333
Solyc11g069030	blind	MYB	MYB110	[91]	AT2G36890/AT5G23000	RAX2-MYB38-BIT1-ATMYB38/ATMYB37-RAX1-MYB37-	0.435	0.0475	0.0895	0.9425		0.184667	0.173333	1.06633	2.14867
Solyc11g071300	Myb	MYB	MYB3R-4				4.4075	2.8515	7.487	9.4455		6.91333	3.06233	19.0307	10.981
Solyc11g071500	Transcription factor DIVARICATA	MYB		[91]			6.343	3.1465	5.494	3.8975		1.89867	4.16933	4.30233	5.61467
Solyc11g072060	Myb-related protein	MYB	MYB104				0.3625	0.4835	0.868	0.474		1.07433	0.392	1.21667	0.675333
Solyc11g073120	R2R3MYB transcription factor 58	MYB	MYB48	[91]	AT5G59780	ATMYB59-1-MYB59-ATMYB59-ATMYB59-3	23.2145	193.886	17.5455	20.0265		81.9517	74.9213	32.4143	87.0693
Solyc12g005640	R2R3MYB transcription factor 68	MYB	MYB28				0	0.0325	0.0345	0.0375		3.249	0.00666667	0.015	0.0323333
Solyc12g008670	blind-like4	MYB	MYB38				0.5955	0.094	0.1755	0.2875		0.571	0.171333	0.109	0.958667
Solyc12g049300	R2R3MYB transcription factor 54	MYB	MYB23
Solyc12g049350	R2R3MYB transcription factor 11	MYB	MYB12
Solyc12g096200	R2R3MYB transcription factor 6	MYB	MYB11
Solyc12g099120	Abscisic acid induced MYB1	MYB	MYB112		AT1G48000	MYB112-AtMYB112	0	0.136	0	0		2.636	0	0.0393333	0.042
Solyc12g099130	R2R3MYB transcription factor 108	MYB	MYB57		AT1G48000	MYB112-AtMYB112
Solyc12g099140	R2R3MYB transcription factor 45	MYB	MYB108				0.274	1.7055	0.3335	0.1825		1.86567	0.708	0.413333	0.603333
Solyc01g009650	MYB transcription factor	MYB_related	MYB112
Solyc01g016770	MYB transcription factor	MYB_related	MYB-R-2
Solyc01g067560	Protein always early 3	MYB_related	MYB-R-3		AT3G21430	ALY3-ATALY3	22.588	14.8945	24.9745	24.0325		23.7733	24.3653	32.4303	37.6043
Solyc01g073950	Myb_DNA-binding domain-containing protein/Bromodomain domain-containing protein	MYB_related	MYB-R-4		AT2G44430		32.637	31.966	32.266	33.46		52.4273	35.508	30.7297	31.79
Solyc01g079210	SWR1-complex protein 4	MYB_related	MYB-R-5		AT2G47210	SWC4-ATSWC4	25.6805	22.399	23.5855	24.834		19.1993	24.868	25.9807	26.02
Solyc01g095030	Altered Response to Salt Stress 1	MYB_related	MYB-R-6				11.1445	18.907	20.9865	20.228		48.5443	21.6617	16.3853	20.3177
Solyc01g095640	MYB-like transcription factor TCL1	MYB_related	MYB-R-7		AT5G53200	TRY-MAU5	4.1145	3.322	0.561	0.3255		1.12467	0.296	1.133	0.711
Solyc01g096700	DnaJ domain-containing protein	MYB_related	MYB-R-8		AT3G11450	ZRF1a-AtGlsA1	724.297	366.817	194.268	316.342		403.934	197.747	285.002	401.41
Solyc01g106940	Telomere repeat-binding factor 2	MYB_related	MYB-R-9				10.2635	6.6955	10.5785	12.6865		6.51333	5.76	8.929	15.042
Solyc01g109690	Protein RADIALIS-like 6	MYB_related	MYB-R-10		AT1G19510/AT1G75250/AT2G18328	RL5-ATRL5-RSM4/ATRL6-RSM3-RL6/RL4-ATRL4	0	2.161	0.6985	0.708		0	0.0163333	0.012	0.00266667
Solyc02g036370	Protein REVEILLE 7-like	MYB_related	MYB-R-11		AT5G17300	RVE1	67.0435	202.519	18.774	90.8135		15.4237	36.638	29.9083	43.6677
Solyc02g064630	Telomere repeat-binding factor 1	MYB_related	MYB-R-12				31.5815	23.3455	21.2675	23.1455		18.2023	24.0057	22.2983	24.0537
Solyc02g082375	Transcription factor DIVARICATA	MYB_related	MYB-R-13
Solyc02g082390	Transcription factor DIVARICATA	MYB_related	MYB-R-14
Solyc02g085145	Transcription factor RADIALIS	MYB_related	MYB-R-15
Solyc02g086690	MYB transcription factor	MYB_related	MYB-R-16
Solyc03g098320	Protein REVEILLE 1	MYB_related	MYB-R-17		AT1G18330	EPR1-RVE7	15.1505	6.389	37.9795	39.0745		79.7417	13.3267	15.9287	21.8293
Solyc03g113530	MYB transcription factor	MYB_related	MYB-R-18
Solyc03g113620	Transcription factor MYB1R1	MYB_related	MYB-R-19		AT1G19000/AT1G74840		329.502	242.048	146.264	278.861		226.664	144.635	89.0773	147.78
Solyc03g121840	telomere repeat-binding factor 4-like	MYB_related	MYB-R-20		AT1G17520		7.3405	10.6975	12.1665	14.8145		10.4163	16.3337	14.367	15.447
Solyc03g121990	Developmentally-regulated GTP-binding protein 2	MYB_related	MYB-R-21		AT1G72650	TRFL6	45.328	23.176	40.684	42.3555		55.1397	35.5233	35.642	44.087
Solyc04g005100	transcription factor MYB1R1-like	MYB_related	MYB-R-22				11.047	91.7225	33.175	32.8055		61.1367	43.896	21.9877	24.4927
Solyc04g050000	R2R3MYB transcription factor 73	MYB_related	MYB-R-23
Solyc04g050080	MYB-RELATED transcription factor	MYB_related	MYB-R-24
Solyc04g050100	MYB-RELATED transcription factor	MYB_related	MYB-R-25
Solyc04g076360	Homeodomain-like superfamily protein	MYB_related	MYB-R-26				6.9045	7.1515	6.822	8.491		5.83633	6.383	7.978	8.45167
Solyc04g080500	Protein RADIALIS-like 6	MYB_related	MYB-R-27		AT2G21650	RSM1-ATRL2-MEE3-	0.891	0.3015	0.0905	0.4435		3.757	2.99533	0.211333	0.352
Solyc04g150172	Protein RADIALIS-like 6	MYB_related	MYB-R-28
Solyc05g013420	Transcription factor DIVARICATA	MYB_related	MYB-R-29
Solyc05g052610	Transcription factor DIVARICATA	MYB_related	MYB-R-30		AT5G05790		135.001	16.285	10.8605	15.123		15.9207	5.355	4.594	10.9383
Solyc06g005310	Transcription factor MYB48	MYB_related	MYB-R-31				0.873	0.252	0.064	0.0095		3.944	4.76033	3.62933	5.14333
Solyc06g005590	Telomere repeat-binding protein 4	MYB_related	MYB-R-32		AT1G07540	TRFL2	28.3975	13.5395	22.137	20.057		18.9497	11.1523	19.7133	23.8857
Solyc06g009430	Transcription factor	MYB_related	MYB-R-33
Solyc06g034030	Transcription factor DIVARICATA	MYB_related	MYB-R-34
Solyc06g036300	Homeodomain-like superfamily protein	MYB_related	MYB-R-35		AT5G52660	RVE6	15.9855	19.5925	15.591	17.8655		12.6893	15.951	15.1513	19.397
Solyc06g071230	Transcription factor MYB1R1	MYB_related	MYB-R-36		AT1G19000/AT1G74840		180.808	112.028	102.124	138.446		128.309	130.914	96.9777	99.1
Solyc06g075660	MYB transcription factor	MYB_related	MYB-R-37				15.5575	54.925	7.661	8.777		53.9747	15.2637	10.114	12.9857
Solyc06g075670	MYB transcription factor	MYB_related	MYB-R-38				2.8215	9.129	1.259	1.7245		11.9143	2.70067	2.00733	2.214
Solyc06g082510	Myb_DNA-binding domain-containing protein	MYB_related	MYB-R-39		AT1G15720	TRFL5	17.1775	12.93	14.019	18.0825		15.1943	13.9487	16.0217	18.6033
Solyc07g026680	Transcription factor DIVARICATA	MYB_related	MYB-R-40				27.228	17.7275	3.1735	3.5805		8.39033	3.71567	3.98167	15.02
Solyc07g040920	telomere repeat-binding factor 4-like	MYB_related	MYB-R-41		AT1G17520		11.307	14.279	14.913	14.5105		14.4123	16.797	13.596	14.5927
Solyc07g052490	MYB-like transcription factor ETC1	MYB_related	MYB-R-42				0	0.207	0.8655	0.067		0.159333	0.425667	0.192	0.0436667
Solyc08g065380	Transcription factor MYB1R1	MYB_related	MYB-R-43				0.5395	0.291	0.0855	0.2685		1.241	0.835333	0.241667	1.02133
Solyc08g066190	Cyclin-D-binding Myb-like transcription factor 1	MYB_related	MYB-R-44		AT5G41020		0.0995	0.145	0.053	0.075		0.0783333	0.186	0.638667	0.261
Solyc08g078340	Transcription factor DIVARICATA	MYB_related	MYB-R-45		AT5G47390	KUA1-MYBH	92.8345	62.7635	45.7365	110.805		51.0207	78.6877	37.5383	46.992
Solyc09g007570	Transcription factor DIVARICATA	MYB_related	MYB-R-46				3.4325	5.4865	2.263	3.7445		1.498	1.72267	1.57333	2.57333
Solyc09g007580	Transcription factor DIVARICATA	MYB_related	MYB-R-47
Solyc09g007990	Telomere repeat-binding protein 4	MYB_related	MYB-R-48		AT2G37025	TRFL8	28.362	25.7545	26.573	27.6565		21.8933	28.0187	28.3827	30.7267
Solyc09g008100	TSL-kinase interacting protein 1	MYB_related	MYB-R-49		AT2G36960	TKI1	25.756	21.17	27.6915	25.472		22.497	28.3157	28.9047	32.511
Solyc10g005080	Late elongated hypocotyl	MYB_related	MYB-R-50		AT1G01060	LHY1-LHY	36.352	218.323	118.57	68.575		533.719	36.7093	49.0033	72.385
Solyc10g019150	Transcription factor MYB1R1	MYB_related	MYB-R-51
Solyc10g052470	Protein RADIALIS-like 6	MYB_related	MYB-R-52		AT4G39250	RSM2-RL1-ATRL1-	0	8.454	0.593	0.5375		1.078	1.62067	1.041	0.336
Solyc10g080300	Telomere repeat-binding factor 3	MYB_related	MYB-R-53				17.3385	14.6705	10.3415	13		15.0807	8.10367	10.3617	11.296
Solyc10g080920	Protein RADIALIS-like 2	MYB_related	MYB-R-54				5.5115	5.6435	2.754	3.1235		1.69933	0.504667	0.164333	0.494
Solyc10g084370	Homeodomain-like superfamily protein	MYB_related	MYB-R-55		AT3G09600	LCL5-RVE8	21.8175	4.459	10.2365	13.6045		66.783	8.195	4.80067	9.92767
Solyc11g013560	Transcription factor DIVARICATA	MYB_related	MYB-R-56
Solyc11g013620	Transcription factor DIVARICATA	MYB_related	MYB-R-57
Solyc11g039750	MYB transcription factor	MYB_related	MYB-R-58
Solyc11g044320	Telomere repeat-binding factor 1	MYB_related	MYB-R-59		AT1G49950	ATTRB1-TRB1	17.764	20.1015	21.692	24.0355		10.2033	24.8373	21.595	25.2903
Solyc11g050730	Transcription factor MYB1R1	MYB_related	MYB-R-60
Solyc11g069850	Telomere repeat-binding protein 6	MYB_related	MYB-R-61				1.6405	0.3855	0.244	0.712		0.833333	0.565667	0.735333	1.20867
Solyc12g005890	Transcription factor GAMYB	MYB_related	MYB-R-62
Solyc12g008800	Transcription factor DIVARICATA	MYB_related	MYB-R-63		AT5G56840		3.5665	43.75	9.328	10.188		2.17233	3.764	5.49	8.227
Solyc12g019810	MYB-RELATED transcription factor	MYB_related	MYB-R-64
Solyc12g019840	MYB-RELATED transcription factor	MYB_related	MYB-R-65		AT2G13960
Solyc12g019900	MYB-RELATED transcription factor	MYB_related	MYB-R-66
Solyc12g019910	MYB-RELATED transcription factor	MYB_related	MYB-R-67
Solyc12g044610	Transcription factor MYB1R1	MYB_related	MYB-R-68		AT3G16350	NID1	38.3205	32.1595	21.1865	31.2465		26.3147	14.3367	17.3433	26.4413
Solyc12g087970	Homeodomain-like superfamily protein	MYB_related	MYB-R-69		AT1G09710/AT1G58220	DP1/DRMY1	25.678	21.7075	21.47	20.591		21.6963	19.9563	23.3683	24.3533
Solyc12g088610	MYB-RELATED transcription factor	MYB_related	MYB-R-70
Solyc12g089170	Transcription factor RADIALIS	MYB_related	MYB-R-71
Solyc12g089190	Protein RADIALIS-like 6	MYB_related	MYB-R-72		AT1G19510/AT1G75250	RL5-ATRL5-RSM4/ATRL6-RSM3-RL6-
Solyc01g009860	NAC domain-containing protein	NAC	NAC001	[87]	AT5G13180	ANAC083	38.527	110.762	80.1495	59.1645		32.582	31.812	32.6543	63.0243
Solyc01g021730	NAC domain-containing protein	NAC	NAC002	[87]
Solyc01g102740	NAC domain	NAC	NAC004	[87]	AT2G02450	LOV1-AtLOV1-NAC035-ANAC035	4.5285	5.9505	5.8345	2.7535		4.99367	5.93967	5.853	7.956
Solyc01g104900	NAC domain-containing protein	NAC	NAC005	[87]	AT5G64530	ANAC104-XND1	21.6545	6.3845	0.4165	1.6785		3.02333	1.839	1.44	3.158
Solyc02g036430	NAC domain-containing protein 78	NAC	NAC006	[87]	AT1G65910	NAC028-anac028	1.91	2.1395	0.9655	1.103		1.36233	0.466667	0.740667	1.02067
Solyc02g061780	NAC domain	NAC	NAC007	[87]			0	2.5855	0.561	0.311		0.0596667	0.0823333	0.132	0.419667
Solyc02g061870	Senescence-specific cysteine protease SAG39	NAC	NAC008	[87]
Solyc02g061900	Senescence-specific cysteine protease SAG39	NAC	NAC009	[87]
Solyc02g061910	Senescence-specific cysteine protease SAG39	NAC	NAC010	[87]
Solyc02g062060	Senescence-specific cysteine protease SAG39	NAC	NAC011	[87]
Solyc02g062070	NAC domain-containing protein 96-like	NAC	NAC012	[87]
Solyc02g062210	NAC domain	NAC
Solyc02g069960	NAC domain-containing protein	NAC	NAC013	[87]			0.0285	3.2075	1.996	1.1785		0.470333	0.384333	3.75867	3.23867
Solyc02g077610	NAC domain protein	NAC	NAC015	[87]	AT4G28500	NAC073-SND2-ANAC073-	1.3335	35.3475	17.067	24.29		5.021	2.81067	4.70033	6.52733
Solyc02g081270	NAC domain-containing protein 53	NAC	NAC016	[87]			5.6585	16.4005	6.33	8.46		5.44767	20.8263	30.0603	15.5407
Solyc02g084350	NAC domain-containing protein	NAC	NAC017	[87]	AT2G18060	VND1-ANAC037	3.8085	1.9065	0.1335	0.165		6.588	2.426	4.88833	7.076
Solyc02g087920	NAC domain	NAC	NAC018	[87]	AT1G26870/AT5G39820	FEZ-ANAC009/anac094-NAC094	2.179	1.4	2.5755	2.756		0.608	0.428667	0.6	0.735
Solyc02g088180	NAC domain-containing protein	NAC	NAC019	[87]	AT3G29035/AT5G39610	NAC3-ANAC059-ATNAC3-ORS1/ANAC092-ATNAC2-NAC2-NAC6	2.1765	0.8065	0.5675	1.8985		1.65067	1.53267	2.64433	8.87567
Solyc02g093420	NAC domain-containing protein 10	NAC	NAC020	[87]	AT3G01600	NAC044-anac044	4.6675	48.7645	85.057	71.2555		12.972	18.9093	37.068	34.9677
Solyc03g059300	NAC domain-containing protein	NAC	NAC021	[87]
Solyc03g062670	NAC domain-containing protein	NAC	NAC022	[87]
Solyc03g062750	NAC domain	NAC	NAC023	[87]
Solyc03g078120	NAC domain	NAC	NAC024	[87]			9.493	6.9675	8.531	5.701		7.82567	6.65267	6.67033	9.637
Solyc03g080090	NAC domain-containing protein 86	NAC	NAC025	[87]	AT3G49530/AT5G24590	ANAC062-NAC062-NTL6/ANAC91-TIP-ANAC091	114.034	86.8265	182.464	220.39		410.513	149.846	138.493	187.978
Solyc03g083880	NAC domain-containing protein	NAC	NAC026	[87]			2.066	2.081	0.1915	0.4205		3.72967	2.68067	2.28167	3.34533
Solyc03g097650	NAC domain	NAC	NAC027	[87]			8.429	9.333	4.643	7.1025		2.12	6.147	4.97367	5.774
Solyc03g098190	NAC domain	NAC	NAC028	[87]			2.2395	1.379	0.7235	1.7075		1.23433	0.612	0.864	1.31367
Solyc03g114220	NAC domain-containing protein	NAC	NAC029	[87]
Solyc03g114260	NAC domain-containing protein	NAC	NAC030	[87]
Solyc03g115850	NAC domain-containing protein	NAC	NAC031	[87]	AT5G07680/AT5G61430	NAC080-ANAC080-ATNAC4-ANAC079/NAC100-ATNAC5-ANAC100-	1.817	4.701	2.474	4.0275		7.507	6.96067	4.42967	7.754
Solyc04g005610	NAC domain-containing protein 2	NAC	NAC032	[87]	AT1G69490	NAP-ATNAP-ANAC029-	0.8845	83.559	42.6685	66.5735		1.848	26.7963	2.50467	15.66
Solyc04g009440	NAC domain protein AY498713	NAC	NAC033	[87]	AT5G08790	ATAF2-anac081	23.259	67.599	37.189	33.6345		338.408	83.6887	29.8343	48.0927
Solyc04g025760	NAC domain-containing protein	NAC	NAC034	[87]
Solyc04g072220	NAC domain-containing protein 78	NAC	NAC035	[87]	AT1G34190	anac017-NAC017-RAO2-	61.307	41.712	54.6125	57.904		71.3697	44.3953	52.557	76.2437
Solyc04g078670	NAC domain protein	NAC	NAC036	[87]			2.1585	1.9485	4.8325	2.994		6.58267	1.93033	3.32833	3.558
Solyc04g079940	NAC domain-containing protein	NAC	NAC037	[87]			45.939	35.718	59.611	82.9665		64.5277	39.806	30.391	51.3367
Solyc05g007550	NAC domain	NAC	NAC038	[87]	AT1G26870	FEZ-ANAC009	0	0	0	0.011		0.494667	1.05133	2.31	1.54433
Solyc05g007770	NAC domain TF	NAC	NAC039	[87]	AT1G69490	NAP-ATNAP-ANAC029-	5.1525	19.2625	5.21	8.284		1.34	10.4097	0.805	4.67667
Solyc05g009840	NAC domain-containing protein 8	NAC	NAC040	[87]	AT1G25580	SOG1-ANAC008	54.6925	31.346	37.627	43.6205		59.741	34.7693	37.8163	49.072
Solyc05g021090	NAC domain	NAC	NAC041	[87]			0.08	2.2125	2.685	2.169		0.238667	0.350333	0.641667	1.449
Solyc05g026180	NAC domain	NAC	NAC042	[87]	AT4G29230	anac075-SND4-NAC075-	9.15	4.8135	1.8305	3.0635		7.24167	2.08733	2.75033	3.592
Solyc05g055470	NAC domain-containing protein 13	NAC	NAC043	[87]	AT3G10500/AT5G04410	ANAC053-NAC053-NTL4-AIF/NAC2-anac078-NAC78-NTL11	34.1775	37.981	42.0155	42.234		44.1667	65.484	48.3	53.214
Solyc05g055480	NAC domain-containing protein	NAC	NAC044	[87]	AT3G10490	ANAC052-ANAC051-SGS1-NAC052	42.1205	43.9615	41.0345	53.54		36.4617	41.305	33.9283	39.4747
Solyc05g056477	NAC domain-containing protein	NAC
Solyc06g008360	NAC domain-containing protein	NAC	NAC045	[87]	AT4G28530	anac074-NAC074-KIRA1-	0.734	1.5095	0.5755	0.9975		1.15367	0.588667	1.48233	0.933667
Solyc06g034340	NAC domain	NAC	NAC046	[87]			3.402	3.368	0.146	0.331		5.04267	1.261	4.949	4.99867
Solyc06g060230	NAC domain-containing protein	NAC	NAC047	[87]	AT1G01720	ATAF1-ANAC2-ANAC002-	19.8645	64.9605	60.945	44.4185		53.2173	62.8373	38.1353	49.5397
Solyc06g061080	NAC domain-containing protein 45	NAC	NAC048	[87]	AT1G32510	NAC011-ANAC011	1.0375	1.394	2.8675	3.62		0.764333	3.15333	2.16033	3.3
Solyc06g063380	NAC domain	NAC	NAC049	[87]
Solyc06g063430	NAC domain	NAC	NAC050	[87]	AT1G33280/AT4G10350	ANAC015-BRN1-NAC015/BRN2-NAC070-ANAC070-	0	0	0.0185	0		0.122333	0.591333	1.51033	0.649333
Solyc06g065410	NAC domain-containing protein 37	NAC	NAC051	[87]	AT1G71930	ANAC030-VND7	0.4835	2.5415	0.321	0.651		0.441	0.724667	1.163	2.01367
Solyc06g068580	NAC domain-containing protein	NAC	NAC052	[87]
Solyc06g069100	NAC domain	NAC	NAC053	[87]			0	0	0.0175	0.124		0	0.0116667	0.221667	1.301
Solyc06g069710	NAC domain-containing protein	NAC	NAC054	[87]	AT5G61430	NAC100-ATNAC5-ANAC100-	0.0285	4.696	1.735	1.2435		0.392	2.22133	1.08833	2.11267
Solyc06g073050	NAC domain-containing protein 14	NAC	NAC055	[87]	AT3G49530/AT5G24590	ANAC062-NAC062-NTL6/ANAC91-TIP-ANAC091	44.9295	19.9495	36.377	46.704		415.967	33.257	38.7547	43.349
Solyc06g074170	NAC domain-containing protein 40	NAC	NAC056	[87]	AT2G27300/AT3G44290/AT5G22290	ANAC040-NTL8/ANAC60-ANAC060-NTL5-NAC060/NTL14-NAC089-FSQ6-anac089	1.3355	4.834	1.404	1.8815		1.056	3.66467	7.74833	2.80667
Solyc07g006840	NAC domain-containing protein 2	NAC	NAC057	[87]
Solyc07g045030	NAC domain-containing protein	NAC	NAC058	[87]	AT2G43000	AtJUB1-ANAC042-JUB1-NAC042	0.0285	2.417	1.2085	0.638		1.35267	1.86467	2.319	3.73167
Solyc07g053590	NAC domain	NAC	NAC059	[87]	AT4G28500	NAC073-SND2-ANAC073-	2.672	4.157	0.364	0.572		8.15667	1.63133	6.51267	9.65367
Solyc07g053680	NAC domain-containing protein	NAC	NAC060	[87]
Solyc07g062240	NAC domain-containing protein	NAC	NAC061	[87]
Solyc07g062840	goblet	NAC	NAC062	[87]	AT5G53950	CUC2-ATCUC2-ANAC098-	0.369	0.765	1.106	13.833		0.272667	0.351	0.501667	0.417333
Solyc07g063410	NAC domain protein	NAC	NAC063	[87]	AT1G52890/AT3G15500/AT4G27410	ANAC19-NAC019-ANAC019/ANAC55-ATNAC3-NAC055-ANAC055/ANAC72-AtRD26-RD26-ANAC072	1.9365	1.2675	0.971	5.2185		1.392	1.447	1.31033	4.29167
Solyc07g063420	NAC domain-containing protein	NAC	NAC064	[87]	AT3G15510	NAC2-NARS1-ANAC056-ATNAC2	1.715	8.318	7.345	14.7715		4.12833	3.35733	2.209	11.1573
Solyc07g066330	NAC domain-containing protein	NAC	NAC065	[87]	AT1G56010	NAC1-ANAC022-anac021-	0.7515	2.3335	1.417	4.994		5.14567	5.671	2.47633	6.913
Solyc08g006020	NAC domain-containing protein	NAC	NAC066/70	[87]	AT2G24430	ANAC039-ANAC038-NAC038-	0	0.0095	0.0465	0.736		0.0816667	0.196	0.175667	8.25033
Solyc08g007015	NAC domain	NAC	NAC067
Solyc08g008660	NAC domain-containing protein, putative	NAC	NAC068	[87]	AT1G32770/AT3G61910	NST3-SND1-ANAC012-NAC012/NAC066-NST2-ANAC066-	1.806	0.859	0.493	2.3725		8.66267	1.082	5.67567	8.527
Solyc08g028850	NAC domain-containing protein 68	NAC	NAC069	[87]
Solyc08g077110	NAC domain-containing protein 45	NAC	NAC071	[87]	AT4G17980/AT5G46590	NAC071-anac071/anac096-NAC096	0.5235	2.404	6.9705	3.975		1.80067	12.8067	7.967	6.097
Solyc08g079120	NAC domain-containing protein	NAC	NAC072	[87]	AT1G12260/AT1G62700	NAC007-VND4-ANAC007-EMB2749/ANAC026-VND5	4.019	1.7415	0.053	0.4815		1.60067	0.981333	2.09933	3.11933
Solyc09g010160	NAC domain-containing protein 90	NAC	NAC073	[87]
Solyc09g025310	NAC domain-containing protein	NAC	NAC074	[87]	AT4G28530	anac074-NAC074-KIRA1-	1.4215	1.4455	2.0325	6.808		1.118	0.383	1.09467	1.83867
Solyc10g005010	NAC domain-containing protein	NAC	NAC075	[87]	AT2G46770	NST1-ANAC043	1.19	1.826	2.287	3.103		4.10533	3.83567	6.008	10.9413
Solyc10g006880	NAC domain protein	NAC	NAC076	[87]	AT3G15510	NAC2-NARS1-ANAC056-ATNAC2
Solyc10g047060	NAC domain-containing protein	NAC	NAC077	[87]
Solyc10g055760	NAC domain-containing protein 2	NAC	NAC078	[87]	AT2G17040	NAC036-anac036	2.2285	7.398	19.97	22.719		42.8773	5.88767	7.52933	28.432
Solyc10g079220	Senescence-specific cysteine protease SAG39	NAC	NAC079	[87]
Solyc10g083450	NAC domain protein	NAC	NAC080	[87]
Solyc11g005920	NAC domain-containing protein 16	NAC	NAC081	[87]	AT5G09330	NAC082-VNI1-ANAC082-	75.589	88.7785	140.172	127.402		74.5693	81.7313	85.3307	123.529
Solyc11g008000	NAC domain-containing protein 16	NAC	NAC082	[87]	AT3G10500	ANAC053-NAC053-NTL4-AIF	61.447	98.4425	77.788	74.1135		47.3057	95.2643	87.5817	92.7247
Solyc11g008010	NAC domain-containing protein	NAC	NAC083	[87]	AT3G10490	ANAC052-ANAC051-SGS1-NAC052	55.118	60.9525	104.469	116.155		33.2977	71.3223	74.2383	87.2343
Solyc11g017470	NAC domain-containing protein	NAC	NAC084	[87]	AT1G01720	ATAF1-ANAC2-ANAC002-	66.0405	207.828	79.2205	140.339		53.3567	66.7157	25.232	55.8733
Solyc11g018660	NAC domain	NAC	NAC085	[87]			0.3375	5.3215	0.769	1.05		1.10867	1.82733	2.149	2.51167
Solyc11g022480	NAC domain-containing protein 78-like	NAC	NAC086	[87]
Solyc11g065540	NAC domain protein	NAC	NAC087	[87]
Solyc11g068620	NAC domain	NAC	NAC088	[87]	AT5G22380	NAC090-anac090	1.4415	1.2125	1.5405	1.8455		37.3103	4.21233	5.42067	12.7963
Solyc11g068750	NAC domain-containing protein 89	NAC	NAC089	[87]	AT2G27300/AT3G44290/AT5G22290	ANAC040-NTL8/ANAC60-ANAC060-NTL5-NAC060/NTL14-NAC089-FSQ6-anac089	13.509	6.322	7.054	8.5365		4.042	7.045	7.17133	9.01533
Solyc12g013620	jasmonic acid 2	NAC	NAC090	[87]	AT1G52890/AT3G15500/AT4G27410	ANAC19-NAC019-ANAC019/ANAC55-ATNAC3-NAC055-ANAC055/ANAC72-AtRD26-RD26-ANAC072	2.8815	6.459	3.4535	15.857		6.01733	13.727	4.548	16.408
Solyc12g017400	NAC domain-containing protein	NAC	NAC091	[87]	AT1G79580	ANAC033-SMB-URP7-	0.023	0	0.0095	0		0.916667	3.916	4.016	1.96367
Solyc12g036480	NAC domain	NAC	NAC092	[87]	AT3G18400	anac058-NAC058	0	0	0	0.594		0.11	0.0126667	0.299	3.11367
Solyc12g038457	NAC domain	NAC
Solyc12g056790	NAC Transcription Factor	NAC	NAC093	[87]			75.9555	57.441	68.9515	85.7995		112.883	52.9297	48.6853	79.58
Solyc01g006930	Nuclear transcription factor Y subunit A-4	NF-Y	NF-YA10A	[90]	AT3G05690/AT5G06510	ATHAP2B/NF-YA10	28.151	10.8095	12.4265	28.5265		20.5027	18.1593	13.4507	40.2283
Solyc01g008490	Nuclear transcription factor Y subunit A-7	NF-Y	NF-YA1A	[90]			9.1455	8.7375	10.0095	8.2235		7.37033	10.4353	9.229	10.6137
Solyc01g067130	Nuclear transcription factor Y subunit B	NF-Y	NF-YB5	[90]	AT2G47810	NF-YB5	0.135	0.0095	0.0665	0.176		0.774	0.287	0.223667	0.522667
Solyc01g079870	CONSTANS interacting protein 2b	NF-Y	NF-YC9	[90]	AT1G54830	NF-YC3	117.531	80.8735	97.7925	120.373		108.938	116.458	100.598	134.594
Solyc01g087240	Nuclear transcription factor Y subunit A-9	NF-Y	NF-YA9	[90]			36.908	23.277	26.683	43.7055		46.8827	20.699	24.2793	40.965
Solyc01g096710	Dr1-associated corepressor	NF-Y	NF-YC11	[90]	AT3G12480	NF-YC11	75.1115	78.023	72.2085	71.9415		54.3493	90.7633	69.7793	74.8997
Solyc01g099320	Nuclear transcription factor Y subunit B-4	NF-Y	NF-YB5A	[90]	AT1G09030	NF-YB4	0	0	0	0		0.601333	0.575333	1.96633	1.224
Solyc02g021330	Nuclear transcription factor Y subunit C	NF-Y	NF-YC4B	[90]
Solyc02g032180	Nuclear transcription factor Y subunit B-9	NF-Y	NF-YB6A	[90]
Solyc02g032185	Nuclear factor Y, subunit B6	NF-Y
Solyc02g069860	Nuclear transcription factor Y subunit A-7	NF-Y	NF-YA7A	[90]	AT1G30500	NF-YA7	10.042	28.5015	14.4035	12.7015		32.4507	12.433	15.7117	16.3477
Solyc02g091030	Nuclear transcription factor Y subunit C-2	NF-Y	NF-YC4C	[90]			33.4655	32.2875	33.4075	24.6695		30.5247	18.433	19.0783	21.4817
Solyc03g110840	Nuclear transcription factor Y subunit C	NF-Y	NF-YC4D	[90]
Solyc03g110850	Nuclear transcription factor Y subunit C	NF-Y	NF-YC4E	[90]
Solyc03g110860	Nuclear transcription factor Y subunit C-4	NF-Y	NF-YC1A	[90]			60.9285	27.1665	27.8015	34.6715		40.2817	8.00133	21.7507	27.425
Solyc03g111450	Nuclear transcription factor Y subunit C	NF-Y	NF-YC1B	[90]			0.378	0.5395	0.6175	0.385		0.197333	0.349667	0.542	0.320333
Solyc03g111460	Nuclear transcription factor Y subunit C	NF-Y	NF-YC1C	[90]
Solyc03g111470	Nuclear transcription factor Y subunit C-4	NF-Y	NF-YC4F	[90]
Solyc03g114400	Nuclear factor Y, subunit B13	NF-Y	NF-YB13A	[90]	AT5G23090	NF-YB13	19.818	17.9455	13.9025	13.7655		11.4507	12.4447	11.9037	13.2347
Solyc03g121940	Nuclear transcription factor Y subunit A-8	NF-Y	NF-YA3A	[90]			0.886	5.739	4.37	6.425		1.48833	11.7537	7.016	9.64433
Solyc04g009520	Nuclear transcription factor Y subunit B	NF-Y	NF-YB8A	[90]			3.1545	6.9815	4.6475	4.76		5.613	5.64267	5.99667	5.762
Solyc04g015060	Nuclear transcription factor Y subunit B-6	NF-Y	NF-YB6C	[90]	AT1G21970/AT5G47670	EMB212-NF-YB9-AtLEC1-EMB212/L1L-NF-YB6
Solyc04g049910	Nuclear transcription factor Y subunit B-8	NF-Y	NF-YB8B	[90]			29.6835	25.5185	16.57	18.767		16.1303	20.6133	18.1767	19.512
Solyc04g054150	Nuclear transcription factor Y subunit B-3	NF-Y	NF-YB3A	[90]			17.244	11.8505	7.653	8.6915		7.144	15.1867	4.65767	5.63067
Solyc05g005350	Nuclear transcription factor Y subunit B-9	NF-Y	NF-YB6D	[90]
Solyc05g005360	Nuclear transcription factor Y subunit B-9	NF-Y	NF-YB6E	[90]
Solyc05g005370	Nuclear transcription factor Y subunit B	NF-Y
Solyc05g005380	Nuclear factor Y, subunit B6	NF-Y	NF-YB6F	[90]
Solyc05g005390	Nuclear factor Y, subunit B6	NF-Y	NF-YB6G	[90]
Solyc05g005440	Nuclear factor Y, subunit B6	NF-Y	NF-YB6H	[90]
Solyc05g015330	Nuclear transcription factor Y subunit C-4-like protein	NF-Y	NF-YC13	[90]	AT5G43250	NF-YC13	2.13	8.632	1.608	3.6145		3.126	5.534	6.242	3.18067
Solyc05g015550	Nuclear transcription factor Y subunit B-9	NF-Y	NF-YB6I	[90]			0.2605	0.633	0.172	0.2255		0.434667	0.155	0.159667	0.0713333
Solyc06g009010	Nuclear transcription factor Y subunit B-1	NF-Y	NF-YB5B	[90]	AT2G47810	NF-YB5	0	0	0	0		0.313667	0.0343333	0.075	0.401667
Solyc06g016750	Nuclear factor Y, subunit C10	NF-Y	NF-YC10	[90]			55.689	88.6315	38.042	46.351		42.9603	41.5433	42.5207	45.5003
Solyc06g069310	Nuclear factor Y, subunit B13	NF-Y	NF-YB13B	[90]	AT5G08190/AT5G23090	NF-YB12/NF-YB13	45.701	39.708	38.6175	40.284		41.7757	38.659	34.503	43.1793
Solyc06g072040	CONSTANS interacting protein 2a	NF-Y	NF-YC1D	[90]	AT3G48590	HAP5A-NF-YC1-ATHAP5A-	68.014	65.27	50.4865	64.4355		45.4093	57.846	61.4127	68.3407
Solyc07g065500	Nuclear transcription factor Y subunit B-3	NF-Y	NF-YB3B	[90]	AT4G14540/AT5G47640	NF-YB3/NF-YB2	41.7865	16.4955	21.096	62.174		19.493	12.055	26.3667	26.9357
Solyc07g065563	Nuclear transcription factor Y subunit B1	NF-Y
Solyc07g065567	Nuclear transcription factor Y subunit B1	NF-Y
Solyc07g065570	Nuclear transcription factor Y subunit B	NF-Y	NF-YB6J	[90]
Solyc07g065580	Nuclear transcription factor Y subunit B1	NF-Y	NF-YB6K	[90]
Solyc08g007960	Nuclear transcription factor Y subunit C-9	NF-Y	NF-YC3A	[90]
Solyc08g062210	Nuclear transcription factor Y subunit A-1	NF-Y	NF-YA8	[90]	AT1G17590/AT1G72830	NF-YA8/ATHAP2C-NF-YA3-HAP2C-	49.2155	17.503	30.059	40.4335		34.6217	75.318	76.0893	123.171
Solyc09g007290	Nuclear transcription factor Y subunit B-8	NF-Y	NF-YB10	[90]	AT2G37060/AT3G53340	NF-YB8/NF-YB10	64.936	29.4185	40.893	56.1125		25.286	32.6223	44.956	49.2147
Solyc09g074760	Nuclear transcription factor Y subunit B-3	NF-Y	NF-YB5C	[90]	AT2G47810	NF-YB5
Solyc10g009440	Nuclear transcription factor Y subunit B-9	NF-Y	NF-YB6L	[90]
Solyc10g079150	Nuclear transcription factor Y subunit A-7	NF-Y	NF-YA7B	[90]			0.5375	7.5075	5.715	13.166		1.45167	1.188	1.06233	5.78567
Solyc11g016920	Nuclear transcription factor Y subunit C	NF-Y	NF-YC4G	[90]
Solyc11g065700	Nuclear transcription factor Y subunit A-9	NF-Y	NF-YA1B	[90]	AT5G12840	NF-YA1-EMB2220-HAP2A-NFYA1	23.4595	18.4445	18.7435	19.8805		26.8683	18.9333	18.6303	24.905
Solyc11g068480	DNA polymerase epsilon subunit 3	NF-Y	NF-YB11	[90]	AT2G27470	NF-YB11	11.4565	17.5195	11.04	15.3165		8.37567	14.3017	15.0937	14.4497
Solyc11g072150	Dr1-associated corepressor	NF-Y	NF-YC4H	[90]	AT5G19490		7.617	5.7185	5.7625	6.541		5.09167	6.49867	6.971	7.13867
Solyc12g006120	Nuclear transcription factor Y subunit B	NF-Y	NF-YB3C	[90]	AT4G14540	NF-YB3	5.4485	2.9815	1.573	2.9115		2.753	2.11067	2.983	3.62
Solyc12g009050	Nuclear transcription factor Y subunit A-6	NF-Y	NF-YA3B	[90]			1.941	6.014	5.166	7.9735		5.29967	4.14633	8.80867	8.61133
Solyc12g027650	Nuclear transcription factor Y subunit B-7	NF-Y	NF-YB7	[90]	AT2G13570	NF-YB7
Solyc01g007800	ovate family protein 2	OFP	OFP2	[85]	AT2G36026		2.8855	1.0785	0.3035	0.483		0.306667	1.11567	1.51733	1.46867
Solyc01g007810	ovate family protein 3	OFP	OFP3	[85]			0.975	0.5545	0.153	0.329		0.250333	0.292	0.772333	0.773333
Solyc02g072030	ovate family protein 5	OFP	OFP5	[85]	AT4G18830	OFP5-ATOFP5	0.8705	0.5125	0.8785	1.0175		0.451333	0.455	0.966333	1.12567
Solyc03g034100	ovate family protein 6	OFP	OFP6	[85]			4.7365	2.024	0.008	0.1635		20.3973	0.669333	4.28967	8.67567
Solyc03g120190	ovate family protein 7	OFP	OFP7	[85]	AT1G79960	ATOFP14-OFP14	0.4915	0.3375	0.236	0.2665		0.577	0.300667	1.133	1.41633
Solyc03g120790	ovate family protein 8	OFP	OFP8	[85]	AT1G15260		14.2875	9.477	6.4175	6.3145		16.139	5.475	5.75067	3.03467
Solyc04g080210	ovate family protein 9	OFP	OFP9	[85]	AT2G18500/AT5G19650	OFP7-ATOFP7/ATOFP8-OFP8
Solyc05g055220	ovate family protein 10	OFP	OFP10	[85]			5.4515	1.9165	0.8945	0.3175		3.63933	0.741333	1.31967	0.984333
Solyc06g074020	ovate family protein12	OFP	OFP12	[85]			0.6805	0.469	0.1555	0.2875		0.654667	0.047	0.234	0.253333
Solyc06g082450	ovate family protein	OFP	OFP13	[85]	AT2G30395	ATOFP17-OFP17	0.247	0.0375	0	0.0845		0.156667	0.081	2.12067	1.32567
Solyc06g082460	ovate family protein 14	OFP	OFP14	[85]	AT1G06920/AT2G30400/AT5G58360	ATOFP4-OFP4/ATOFP2-OFP2/OFP3-ATOFP3	16.622	5.1835	0.802	1.036		1.226	2.66433	3.29067	4.00133
Solyc09g018200	ovate family protein 17	OFP	OFP17	[85]	AT5G01840	OFP1-ATOFP1
Solyc09g065350	ovate family protein 18	OFP	OFP18	[85]			0.0095	0.033	0.0175	0.453		0.0783333	0.0346667	0.470667	0.275667
Solyc09g082080	ovate family protein 19	OFP	OFP19	[85]	AT1G05420/AT2G32100	OFP12-ATOFP12/ATOFP16-OFP16	0.5055	38.038	33.6775	12.4735		0.956333	1.95167	4.42567	4.61267
Solyc10g076180	ovate family protein 20	OFP	OFP20	[85]			36.895	120.309	185.587	122.942		19.4983	80.271	112.037	86.7323
Solyc10g082050	ovate family protein 21	OFP	OFP21	[85]	AT2G36026/AT3G52525	ATOFP6-OFP6
Solyc10g082060	ovate family protein 22	OFP	OFP22	[85]
Solyc10g083070	ovate family protein 23	OFP	OFP23/24	[85]
Solyc10g083080	ovate family protein 26	OFP	OFP26	[85]
Solyc10g083090	ovate family protein 27	OFP	OFP27	[85]
Solyc10g083100	ovate family protein 28	OFP	OFP25/28	[85]
Solyc11g006670	ovate family protein 29	OFP	OFP29	[85]	AT5G04820	OFP13-ATOFP13	0.6655	1.9425	0.299	0.421		2.47333	1.948	1.752	0.737667
Solyc11g068780	ovate family protein 30	OFP	OFP4/30	[85]			0.366	1.1175	0.1995	0.189		1.86533	0.563667	0.725	0.49
Solyc01g091000	PLATZ transcription factor family protein	PLATZ	PLATZ-1	putative novel transcription repressor	AT3G60670	PLATZ10	3.5055	17.023	25.6785	32.291		2.33733	1.58667	3.85067	5.34633
Solyc02g032555	PLATZ transcription factor family protein	PLATZ	PLATZ0	putative novel transcription repressor
Solyc02g033100	PLATZ transcription factor family protein	PLATZ	PLATZ1	putative novel transcription repressor
Solyc02g033110	PLATZ transcription factor family protein	PLATZ	PLATZ2	putative novel transcription repressor
Solyc02g033120	PLATZ transcription factor family protein	PLATZ	PLATZ3	putative novel transcription repressor
Solyc02g036130	PLATZ transcription factor family protein	PLATZ	PLATZ4	putative novel transcription repressor
Solyc02g036140	PLATZ transcription factor family protein	PLATZ	PLATZ5	putative novel transcription repressor
Solyc02g036170	PLATZ transcription factor family protein	PLATZ	PLATZ6	putative novel transcription repressor
Solyc02g036200	PLATZ transcription factor family protein	PLATZ	PLATZ7	putative novel transcription repressor
Solyc02g036230	PLATZ transcription factor family protein	PLATZ	PLATZ8	putative novel transcription repressor
Solyc02g068510	PLATZ transcription factor family protein	PLATZ	PLATZ9	putative novel transcription repressor	AT1G31040	ORE15-PLATZ3	1.1235	0.108	0.0305	0.1785		1.015	0.206333	0.829667	1.18933
Solyc03g044625	PLATZ transcription factor family protein	PLATZ	PLATZ10	putative novel transcription repressor			1.1215	2.876	1.597	1.5295		1.11	1.87233	1.396	2.048
Solyc04g008090	PLATZ transcription factor family protein	PLATZ	PLATZ11	putative novel transcription repressor	AT2G01818		6.4945	11.834	8.6385	7.7095		9.48633	19.328	15.3283	16.788
Solyc06g061240	PLATZ transcription factor family protein	PLATZ	PLATZ12	putative novel transcription repressor	AT4G17900	PLATZ11	73.539	78.467	43.2965	61.566		36.469	76.8123	43.5343	93.48
Solyc07g007320	PLATZ transcription factor family protein	PLATZ	PLATZ13	putative novel transcription repressor	AT2G12646	PLATZ7-RITF1	0.0095	0	0.008	0		7.748	1.561	17.4827	17.4713
Solyc07g049120	PLATZ transcription factor family protein	PLATZ	PLATZ14	putative novel transcription repressor
Solyc07g049130	PLATZ transcription factor family protein	PLATZ	PLATZ15	putative novel transcription repressor
Solyc08g005100	PLATZ transcription factor family protein	PLATZ	PLATZ16	putative novel transcription repressor			1.0665	3.417	1.2885	1.86		2.91633	3.41	1.66067	2.654
Solyc10g085800	PLATZ transcription factor family protein	PLATZ	PLATZ17	putative novel transcription repressor			2.4975	4.3685	3.0495	2.9815		3.04033	3.405	4.53	3.60233
Solyc12g010470	PLATZ transcription factor family protein	PLATZ	PLATZ18	putative novel transcription repressor	AT2G12646	PLATZ7-RITF1	0	0.0095	0.0095	0		0.019	0.254	1.022	0.564
Solyc01g112190	Plant regulator RWP-RK family protein, putative	RWP-RK	NLP1		AT4G35270	NLP2	0.782	3.68	6.0055	8.4305		4.24767	5.22167	8.77633	6.58767
Solyc02g005607	RWP-RK domain-containing protein	RWP-RK	NLP2				0.7235	0.235	0.686	1.199		2.773	0.440333	3.61167	2.65733
Solyc03g083040	Plant regulator RWP-RK	RWP-RK	NLP3		AT5G53040	RKD4-GRD
Solyc03g116010	RWP-RK domain-containing protein	RWP-RK	NLP4		AT1G18790/AT1G74480	URP5-RKD1-AtRKD1/URP4-AtRKD2-RKD2-
Solyc04g082480	Plant regulator RWP-RK family protein, putative	RWP-RK	NLP5		AT1G20640/AT1G76350	NLP4/NLP5	13.7085	34.4315	21.502	15.887		29.818	28.7857	24.112	23.528
Solyc08g008410	Plant regulator RWP-RK family protein	RWP-RK	NLP6		AT4G24020	NLP7	28.058	34.3305	32.4085	24.342		19.7563	39.1127	36.0303	48.7273
Solyc08g013900	Plant regulator RWP-RK family protein	RWP-RK	NLP7				6.184	5.741	8.961	9.284		2.47367	7.35733	6.39733	6.69767
Solyc08g062200	Plant regulator RWP-RK	RWP-RK	NLP8
Solyc08g082750	Plant regulator RWP-RK family protein	RWP-RK	NLP9		AT4G24020	NLP7	73.2655	53.466	70.0355	66.1805		55.014	68.3103	55.2483	84.2253
Solyc11g045350	Plant regulator RWP-RK family protein	RWP-RK	NLP10		AT2G43500/AT3G59580	NLP8/NLP9	34.3905	20.712	34.5135	29.7325		23.6253	35.8747	36.5483	49.503
Solyc12g011190	Plant regulator RWP-RK	RWP-RK	NLP11		AT1G06500		13.7325	11.271	7.5555	10.6215		9.275	8.92867	9.231	9.09333
Solyc01g080670	Squamosa promoter binding protein 7	SBP	SPL1		AT5G18830	SPL7-ATSPL7	70.675	47.7055	68.7945	72.6205		51.5177	53.4213	61.138	88.831
Solyc01g090730	Squamosa promoter binding protein 8b	SBP	SPL2		AT1G02065	SPL8	1.801	0.6575	0.3695	1.0675		0.407333	0.038	0.102	0.0373333
Solyc02g077920	Colorless non-ripening	SBP	SPL3		AT1G53160/AT2G33810	SPL4-FTM6/SPL3	0.2685	2.533	2.3205	1.0405		0.727667	0.681333	0.397333	1.36633
Solyc04g045560	Squamosa promoter-binding protein 3	SBP	SPL4				0.914	1.42	1.4435	0.9685		0.720667	1.049	1.72933	2.456
Solyc04g064470	Glutathione S-transferase	SBP	SPL5				0.9025	0.5865	0.634	0.4965		0.607333	0.475333	0.513	0.772333
Solyc05g012040	Squamosa promoter binding protein 6b	SBP	SPL6		AT1G69170	AtSPL6-SPL6	8.369	4.427	5.4115	4		5.066	6.555	8.35167	14.5027
Solyc05g015510	Squamosa promoter-binding protein 10	SBP	SPL7		AT5G43270	SPL2	10.527	9.708	10.4405	8.7945		13.4667	7.437	11.368	15.247
Solyc05g015840	Squamosa promoter binding protein 13	SBP	SPL8		AT5G50570/AT5G50670	SPL13-SPL13A/SPL13B-SPL13	6.6445	20.8625	9.351	9.133		121.842	6.38767	7.83633	9.325
Solyc05g053240	Squamosa promoter binding protein12b	SBP	SPL9		AT2G47070/AT3G60030	SPL1/SPL12	45.7745	58.6425	97.4735	97.709		36.742	72.4897	100.651	131.349
Solyc07g053810	Squamosa promoter binding protein 4	SBP	SPL10
Solyc07g062980	Squamosa promoter-binding-like protein	SBP	SPL11
Solyc10g009080	Squamosa promoter binding protein 3	SBP	SPL12		AT1G53160/AT2G33810	SPL4-FTM6/SPL3	0.8045	0.473	0.21	0.3645		0.385333	0.196	0.267	0.342333
Solyc10g018780	Squamosa promoter binding protein 8a	SBP	SPL13		AT1G02065	SPL8	1.089	0.225	0.362	0.9595		0.228667	0.00666667	0.0173333	0.0486667
Solyc10g078700	Squamosa promoter binding protein 15	SBP	SPL14		AT2G42200	SPL9-AtSPL9	11.516	5.599	7.4255	5.0115		1.613	2.99267	8.80967	4.63067
Solyc12g038520	Squamosa promoter binding protein 6c	SBP	SPL15		AT1G69170	AtSPL6-SPL6	5.0765	4.099	3.0145	3.047		1.33767	1.879	2.801	4.09767
Solyc02g062400	Expression of terpenoids 1	SRS	SRS1				6.0495	3.1015	3.1365	3.043		0.721333	1.64733	1.041	1.02967
Solyc02g084680	Protein SHI RELATED SEQUENCE 5	SRS	SRS2				4.5045	5.348	3.004	9.8345		7.04133	3.15033	6.51733	7.10033
Solyc03g033680	Expression of terpenoids 2	SRS	SRS3				1.1155	0.6855	1.0505	0.8925		0.238333	0.744	0.423667	0.487
Solyc04g080970	Protein SHI RELATED SEQUENCE 1	SRS	SRS4		AT3G51060	SRS1-AtSTY1-STY1-	1.0425	0.305	0.299	0.69		5.01867	5.435	11.5117	9.319
Solyc10g054070	Protein SHI RELATED SEQUENCE 4	SRS	SRS5		AT2G21400	SRS3	0.123	0.371	0.0345	0		1.08933	0.258667	1.142	1.98667
Solyc11g064800	Protein LATERAL ROOT PRIMORDIUM 1	SRS	SRS6		AT5G12330	LRP1	19.832	25.764	32.1945	34.4385		24.2417	38.239	61.688	59.271
Solyc01g008230	TCP transcription factor 15	TCP	TCP1		AT5G23280	TCP7	94.0165	47.7645	70.7555	63.5205		78.8943	65.1487	57.1863	56.3137
Solyc01g016414	TCP transcription factor 1	TCP	TCP2
Solyc01g103780	TCP transcription factor 11	TCP	TCP3		AT1G58100	TCP8-AtTCP8	74.8935	76.3745	61.547	73.4515		73.9487	70.97	67.0813	60.0347
Solyc02g065800	TCP transcription factor 28	TCP	TCP4				0	0.709	0.643	1.211		0.489667	0.182667	0.244	0.777333
Solyc02g068200	TCP transcription factor 18	TCP	TCP5		AT3G27010	PCF1-ATTCP20-TCP20-AT-TCP20	12.324	14.348	11.298	19.829		15.031	17.6357	12.7553	16.0597
Solyc02g077250	TCP transcription factor 1	TCP	TCP6				0.7475	0.771	0.79	0.9575		0.717333	0.443667	1.09767	1.584
Solyc02g089020	TCP transcription factor 5	TCP	TCP7		AT3G02150/AT5G08070	A-PTF-1-PTF1-bHLHb1-TCP13/TCP17	2.041	1.3655	1.1545	1.345		1.12667	0.876333	0.85	0.873333
Solyc02g089830	TCP transcription factor 7	TCP	TCP8		AT1G67260	TCP1
Solyc02g094290	TCP transcription factor 27	TCP	TCP9
Solyc03g006800	TCP transcription factor 21	TCP	TCP10		AT5G51910	TCP19	0.4605	0.3705	0.436	2.143		3.77867	1.35167	3.38933	2.20633
Solyc03g045030	TCP transcription factor 26	TCP	TCP11
Solyc03g115010	TCP transcription factor 4	TCP	TCP12		AT5G60970	TCP5
Solyc03g116320	TCP transcription factor 16	TCP	TCP13				20.3705	9.0175	9.3795	11.4575		7.75933	14.3053	8.18067	7.43667
Solyc03g119770	branched1a	TCP	TCP14		AT3G18550	BRC1-ATTCP18-AtBRC1-TCP18	1.1685	2.538	3.3445	7.4695		0.081	0.272667	0.302667	1.17567
Solyc04g006980	TCP transcription factor 22	TCP	TCP15		AT1G68800	BRC2-TCP12	0.8545	1.449	1.0655	1.38		0.699	1.23167	0.761333	0.797667
Solyc04g009180	TCP transcription factor 14	TCP	TCP16		AT5G23280	AtTCP7-TCP7	50.3175	31.4885	23.3745	24.141		46.611	18.786	15.8127	13.5903
Solyc05g007420	TCP transcription factor 23	TCP	TCP17				13.8265	43.997	23.571	33.8645		18.7497	15.6633	11.0133	12.6617
Solyc05g009900	TCP transcription factor 25	TCP	TCP18		AT1G68800	BRC2-TCP12	0.5295	1.361	0.4625	2.2195		0.808667	0.456333	0.341667	0.328667
Solyc05g012840	TCP transcription factor 1	TCP	TCP19
Solyc05g032780	TCP transcription factor 1	TCP	TCP20
Solyc06g065190	TCP transcription factor 13	TCP	TCP21		AT1G58100	TCP8-AtTCP8	57.9645	26.0225	20.777	25.8645		10.6973	15.163	11.5187	16.9833
Solyc06g069240	branched1b	TCP	TCP22
Solyc06g069460	TCP transcription factor 6	TCP	TCP23		AT5G60970	TCP5	0.217	0.7695	0.343	0.426		0.658667	0.800667	0.438333	0.269667
Solyc06g070900	TCP transcription factor 17	TCP	TCP24		AT1G69690/AT3G47620	AtTCP15-TCP15/AtTCP14-TCP14	18.4695	6.5685	3.094	3.0935		5.84267	2.67833	1.607	1.692
Solyc07g053410	TCP transcription factor 10	TCP	TCP25		AT2G31070	TCP10	0.0425	0.733	0.5505	1.1355		0.188333	0.198	0.116667	0.200333
Solyc07g062680	cycloidea	TCP	TCP26		AT3G15030	MEE35-TCP4	0.9925	2.5185	2.9585	2.415		1.04233	2.39	3.00267	2.468
Solyc08g048370	TCP transcription factor 29	TCP	TCP27				0.072	0.249	0.188	0.302		0.404	0.272333	1.15633	1.116
Solyc08g048390	TCP transcription factor 24	TCP	TCP28		AT4G18390	TCP2	3.028	2.0505	1.6925	2.9625		0.974667	0.312333	1.214	1.552
Solyc08g080150	TCP transcription factor 20	TCP	TCP29		AT2G45680	TCP9	9.904	9.5495	5.8185	4.3675		3.29033	13.7443	10.615	9.23767
Solyc09g008030	TCP transcription factor 19	TCP	TCP30		AT2G37000		8.5915	5.3285	3.044	7.9065		3.18667	4.182	3.78767	5.00933
Solyc10g008780	TCP transcription factor 30	TCP	TCP31				0.281	1.175	0.441	0.614		0.0876667	0.168333	0.420667	0.432
Solyc10g018710	TCP transcription factor 1	TCP	TCP32
Solyc10g082063	Transcription factor TCP17	TCP	TCP33				0	1.345	1.0175	1.9465		1.52133	0.387667	0.676667	1.449
Solyc11g020670	TCP transcription factor 12	TCP	TCP34		AT1G72010	TCP22-AtTCP22	67.898	76.5605	71.3155	121.885		71.533	23.2587	33.4713	72.017
Solyc11g045640	TCP transcription factor 1	TCP	TCP35
Solyc12g014140	SlTCP3	TCP	TCP36		AT1G53230	TCP3	0.5665	2.0795	2.745	0.995		0.597667	2.12867	2.914	2.19133
Solyc01g005440	Jasmonate ZIM-domain protein 2	TIFY	TIFY6c	[82]	AT3G17860	JAZ3	139.305	89.805	97.4915	105.142		90.99	47.7077	70.2483	67.979
Solyc01g009730	protein TIFY 9-like	TIFY	TIFY9L
Solyc03g118540	Jasmonate ZIM domain protein e	TIFY	TIFY6a	[82]	AT1G48500/AT3G17860	AtJAZ4-JAZ4-TIFY6A/JAZ3-JAI3-TIFY6B-	4.732	17.8585	10.851	6.8385		39.3597	31.773	60.0047	31.856
Solyc03g122190	Protein TIFY 10A	TIFY	TIFY11a	[82]			22.419	39.7575	19.85	25.123		686.011	20.993	13.788	11.9123
Solyc06g065650	Tify domain-containing protein	TIFY	TIFY8	[82]	AT4G32570	TIFY8	32.4455	59.3895	36.083	31.7495		23.0353	41.691	41.099	44.6377
Solyc06g068930	Jasmonate ZIM domain protein g	TIFY	TIFY6b	[82]			0	0.028	0.0045	0		0.662667	0.762	2.62167	3.75367
Solyc06g084120	Jasmonate ZIM domain protein k.1	TIFY	TIFY4a	[82]	AT4G14713	PPD1-TIFY4A	3.7895	2.2915	1.474	1.712		4.24867	3.09867	3.47733	2.30767
Solyc07g042170	Jasmonate ZIM-domain protein 3	TIFY	TIFY10a	[82]	AT1G19180	JAZ1-TIFY10A-AtJAZ1-	30.1125	72.745	56.302	50.7565		557.362	59.5067	75.9607	39.9297
Solyc08g036505	Jasmonate ZIM domain protein f	TIFY	TIFY5aL
Solyc08g036620	Jasmonate ZIM domain protein f	TIFY	TIFY5b	[82]			0.1825	0	0	0		29.8933	0.0196667	0	0
Solyc08g036640	Jasmonate ZIM domain protein f	TIFY	TIFY5a	[82]	AT1G30135	JAZ8-TIFY5A	0.8525	0.0745	0	0		123.668	0.260333	0.012	0.0273333
Solyc08g036660	Jasmonate ZIM domain protein f	TIFY	TIFY5c	[82]			0	0.047	0.037	0.041		41.0707	0.221333	0.119667	0.0583333
Solyc09g065630	Tify domain-containing protein/CCT_2 domain-containing protein	TIFY	TIFY4b	[82]	AT4G14720	PPD2-TIFY4B	40.7125	34.0905	32.132	35.274		21.338	21.824	26.2253	31.7347
Solyc11g011030	Pto-responsive gene 1	TIFY	TIFY7	[82]			6.2325	6.587	9.496	7.0025		17.3903	2.75533	11.047	5.86167
Solyc12g009220	jasmonate ZIM-domain protein 1	TIFY	TIFY10b	[82]	AT1G19180	JAZ1-TIFY10A-AtJAZ1-	2.7145	3.249	5.8485	3.7855		481.152	9.156	5.63633	4.344
Solyc12g049400	Tify	TIFY	TIFY11b	[82]			1.6745	3.301	2.775	4.434		1.09867	0.432667	2.24567	1.58033
Solyc01g065900	trihelix transcription factor ASR3-like	Trihelix	GT-3	[99]
Solyc01g088820	trihelix transcription factor ASIL2-like	Trihelix	GT-5	[99]	AT2G44730		14.8605	9.739	9.4235	11.4435		6.36867	10.6817	15.395	13.898
Solyc01g096470	Sequence-specific DNA binding transcription factor	Trihelix	GT-6	[99]	AT3G54390		110.694	57.7	30.961	32.4395		37.5923	57.2133	35.114	49.0873
Solyc01g104760	Sequence-specific DNA binding transcription factor	Trihelix	GT-7	[99]	AT1G76870		2.5345	1.2755	1.351	2.0905		1.86967	1.34333	2.04933	2.72167
Solyc02g030460	trihelix transcription factor ASR3-like isoform X1	Trihelix	GT-8	[99]	AT1G31310/AT2G35640		0.7445	0	0.0185	5.315		0.354333	0.0313333	0.674333	0.433667
Solyc02g069390	Myb-like domain-containing protein	Trihelix	GT-9	[99]			4.809	0.614	0.269	0.6515		1.961	0.307333	0.629	0.726
Solyc02g076810	trihelix transcription factor ASIL2-like	Trihelix	GT-10	[99]			31.4165	16.562	20.4055	22.5265		17.268	18.8407	17.1257	22.273
Solyc03g118230	trihelix transcription factor ASR3-like	Trihelix	GT-13	[99]
Solyc03g122030	Trihelix transcription factor ASIL2	Trihelix	GT-14	[99]	AT3G14180	ASIL2	23.892	22.668	19.893	23.142		19.131	20.1763	19.796	23.934
Solyc04g045430	trihelix transcription factor ASR3-like	Trihelix	GT-2-15	[99]	AT2G33550	ASR3	31.8835	32.034	20.1545	25.9845		27.9933	29.0363	27.3207	39.6923
Solyc04g071360	Trihelix transcription factor GTL1	Trihelix	GT-16	[99]	AT1G76880	DF1	61.535	66.744	23.158	20.032		98.304	30.6527	27.997	22.4837
Solyc05g018350	trihelix transcription factor ASIL2-like	Trihelix	GT-17	[99]	AT3G24490		14.0205	16.875	14.621	15.229		14.592	17.9423	16.88	17.6393
Solyc06g051120	trihelix transcription factor ASIL2-like	Trihelix	GT-18	[99]	AT5G05550	ENAP2-VFP5	25.2745	14.9005	16.676	15.5285		14.277	14.297	17.143	19.7647
Solyc06g083430	Trihelix transcription factor ASIL2	Trihelix	GT-19	[99]	AT3G24860	AST1	7.2235	11.9765	9.997	11.023		7.82967	15.3383	13.993	11.5387
Solyc07g055100	Trihelix transcription factor ASIL1	Trihelix	GT-20	[99]			3.1145	1.624	1.545	1.631		1.91	1.99767	3.274	3.18533
Solyc08g005900	Trihelix transcription factor GT-3b-like protein	Trihelix	GT-21	[99]			18.4825	18.544	13.738	15.048		16.2577	19.463	14.6463	13.893
Solyc08g007170	trihelix transcription factor ASIL2	Trihelix	GT-22	[99]			33.577	19.2265	24.2425	24.7765		16.8957	27.3893	25.5377	26.9947
Solyc08g069160	Homeodomain-like, Myb-like domain protein	Trihelix	GT-23	[99]	AT4G31270	HDP2-IDAP2	6.136	7.8335	6.6615	7.529		6.63633	10.7207	8.232	8.527
Solyc09g005560	Trihelix transcription factor GT-3b	Trihelix	GT-24	[99]	AT2G38250/AT5G01380		0.085	9.8415	2.595	3.152		7.18067	7.509	3.29867	2.11633
Solyc09g009250	Trihelix transcription factor GTL1	Trihelix	GT-26	[99]	AT5G03680	PTL	3.4825	0.9955	1.791	3.568		4.83433	3.113	12.3153	19.9997
Solyc11g005380	Trihelix transcription factor GTL1	Trihelix	GT-30	[99]			44.188	42.6815	58.783	58.635		111.157	66.4753	41.1947	54.016
Solyc11g012720	Trihelix transcription factor	Trihelix	GT-31	[99]	AT5G47660		13.926	8.096	9.1715	12.5585		4.85433	6.814	12.0983	15.3453
Solyc12g010890	trihelix transcription factor ASIL1-like	Trihelix	GT-32	[99]	AT3G58630		37.674	8.0595	16.4535	19.7925		16.483	15.6277	15.6733	17.886
Solyc12g043090	trihelix transcription factor ASIL2-like	Trihelix	GT-33	[99]			46.284	32.266	29.738	33.1545		38.2577	32.4527	34.295	43.5527
Solyc12g056510	Trihelix transcription factor GTL1	Trihelix	GT-34	[99]	AT1G76880	DF1	49.6495	69.774	46.0565	37.4205		47.0147	28.8627	49.3693	36.6193
Solyc12g077540	Trihelix transcription factor GT-1	Trihelix	GT-35	[99]	AT1G13450/AT3G25990	GT-1	7.2045	7.796	6.4985	6.8105		6.69833	7.196	6.586	7.65633
Solyc12g100040	Sequence-specific DNA binding transcription factor	Trihelix	GT-36	[99]	AT1G21200		16.105	19.5865	14.8735	16.069		14.6733	14.9113	16.3973	17.8003
Solyc02g077390	compound inflorescence	WOX	WOX9	[92]	AT2G33880/AT5G45980	WOX9A-STIP-HB-3-WOX9/WOX9B-STPL-WOX8-	0.163	0.08	0.008	0.1345		0.194	0.063	0.82	0.649667
Solyc02g082670	WUSCHEL-related homeobox 13	WOX	WOX13	[92]	AT4G35550	HB-4-ATWOX13-WOX13-	35.6995	113.784	87.8945	68.616		93.0767	103.594	90.084	83.0137
Solyc02g083950	wuschel	WOX	WUS		AT2G17950	WUS-WUS1-PGA6	0	0.7225	8.296	13.417		0	0	0.012	0.0106667
Solyc03g096300	WUSCHEL-related homeobox protein	WOX	WOX5	[92]	AT3G11260	WOX5B-WOX5	0	0	0	0.0095		0.325667	0.461333	0.936333	0.958
Solyc03g118770	WUSCHEL-related homeobox 6	WOX	WOX1	[92]	AT3G18010	WOX1	3.2115	0.752	1.682	0.775		0.282	2.73633	2.30933	0.697
Solyc04g078650	wuschel related homobox 4	WOX	WOX4	[92]	AT1G46480	WOX4-	15.0185	22.693	27.314	20.276		28.346	33.1413	65.8343	53.2947
Solyc06g072890	WUSCHEL related homeobox 11	WOX	WOX11	[92]	AT3G03660/AT5G17810	WOX11/WOX12	0.313	1.1825	1.001	0.529		1.072	1.13	1.67067	0.721333
Solyc06g075567	WUSCHEL-related homeobox 5	WOX	WOX3L
Solyc06g076000	WUSCHEL-related homeobox 5	WOX	WOX2	[92]	AT5G59340	WOX2
Solyc11g072770	WUSCHEL-related homeobox protein	WOX	WOX3b	[92]			0.6715	0.254	0.1115	0.0865		0.726333	0.843667	0.421	0.217667
Solyc11g072790	WOX3b	WOX	WOX3a	[92]	AT2G28610	PRS1-WOX3-PRS-	0.0455	1.8665	0.4835	0.4115		3.732	0.22	0.559333	0.166667
Solyc01g058540	WRKY transcription factor 47	WRKY	WRKY47	[84]	AT5G49520	WRKY48
Solyc01g079260	WRKY transcription factor 23	WRKY	WRKY23	[84]	AT2G47260	ATWRKY23-WRKY23	13.346	104.291	97.3655	85.1445		86.7393	39.5347	52.905	49.627
Solyc01g079360	WRKY transcription factor 37	WRKY	WRKY37	[84]			9.5785	11.3385	15.4635	15.798		6.72533	10.4767	6.68233	6.88233
Solyc01g089960	WRKY transcription factor 12	WRKY	WRKY12	[84]	AT2G44745	WRKY12-AtWRKY12	33.4075	21.5825	10.2325	11.841		10.894	5.28767	4.72667	7.895
Solyc01g095100	WRKY transcription factor 22	WRKY	WRKY22	[84]			21.5175	10.495	4.602	6.3095		47.4963	7.653	9.79833	10.513
Solyc01g095630	WRKY transcription factor 41	WRKY	WRKY41	[84]			34.602	65.9795	30.7225	44.4675		637.337	33.47	27.137	44.5957
Solyc01g104550	WRKY transcription factor 9	WRKY	WRKY9	[84]	AT1G68150	ATWRKY9-WRKY9	1.6365	0.5995	0.645	0.452		0.091	0.177333	0.27	1.547
Solyc02g021680	WRKY transcription factor 35	WRKY	WRKY35	[84]	AT1G30650	AR411-WRKY14-ATWRKY14-	7.307	7.282	6.723	6.1805		1.37933	2.44533	3.69267	5.916
Solyc02g032950	WRKY transcription factor 16	WRKY	WRKY16	[84]			3.3785	59.809	51.2665	33.708		27.784	52.3817	23.439	26.4477
Solyc02g067430	WRKY transcription factor 72	WRKY	WRKY72	[84]	AT5G15130	ATWRKY72-WRKY72	0	0.1035	0.204	0.1985		0.489333	0.599333	2.44933	3.56667
Solyc02g071130	WRKY transcription factor 71	WRKY	WRKY71	[84]	AT1G29860/AT4G18170	ATWRKY71-EXB1-WRKY71/ATWRKY28-WRKY28	0.1685	17.824	4.106	3.548		1.78233	15.719	8.66	6.46
Solyc02g072190	WRKY transcription factor 79	WRKY	WRKY79	[84]	AT1G29280	ATWRKY65-WRKY65	4.2705	7.835	6.2475	6.469		5.60033	13.162	14.0257	20.0137
Solyc02g080890	WRKY transcription factor 6	WRKY	WRKY6	[84]	AT1G62300	WRKY6-ATWRKY6	6.139	48.413	19.562	12.4185		47.6017	49.7243	29.7037	23.6143
Solyc02g088340	WRKY transcription factor 3	WRKY	WRKY3	[84]			31.262	21.6625	19.719	26.229		8.52033	10.6877	15.142	19.2687
Solyc02g093050	WRKY transcription factor 8	WRKY	WRKY8	[84]			37.2745	63.1485	68.3545	63.4275		43.2393	79.855	66.0487	72.2443
Solyc02g094270	DNA-binding WRKY	WRKY	WRKY38	[84]	AT3G01970	WRKY45-ATWRKY45	0.0685	0.0655	0.3225	0.096		2.51333	0.975667	0.031	0.0426667
Solyc03g007380	WRKY transcription factor 52	WRKY	WRKY52	[84]			0.019	0.5125	0.174	0.3495		6.726	0.178667	0.514333	0.981
Solyc03g007640	WRKY transcription factor 68	WRKY	WRKY68	[84]
Solyc03g082750	WRKY transcription factor 27	WRKY	WRKY27	[84]
Solyc03g082810	WRKY transcription factor 26	WRKY	WRKY26	[84]
Solyc03g095770	WRKY transcription factor 80	WRKY	WRKY80	[84]	AT3G56400	ATWRKY70-WRKY70	13.7775	4.4385	4.6385	17.9445		148.986	5.01067	5.33833	21.1327
Solyc03g104810	WRKY transcription factor 5	WRKY	WRKY5	[84]			40.1075	50.0855	51.184	50.019		49.079	61.4917	55.2193	59.9713
Solyc03g113120	WRKY transcription factor 73	WRKY	WRKY73	[84]	AT5G15130	ATWRKY72-WRKY72	0.459	2.175	2.097	2.2455		2.383	4.594	3.756	3.49667
Solyc03g116890	WRKY transcription factor 39	WRKY	WRKY39	[84]	AT1G80840	ATWRKY40-WRKY40	12.254	6.3835	3.6375	2.8005		545.701	10.3153	3.54067	7.217
Solyc04g050210	WRKY transcription factor 69	WRKY	WRKY69	[84]
Solyc04g051540	WRKY transcription factor 13	WRKY	WRKY13	[84]	AT4G39410	ATWRKY13-WRKY13	6.043	5.0285	5.089	7.8855		1.97533	6.11233	8.11567	7.977
Solyc04g051690	WRKY transcription factor 51	WRKY	WRKY50/51	[84]	AT5G64810	ATWRKY51-WRKY51	0.1325	0.047	0.2405	2.6055		14.139	2.263	0.559667	7.78933
Solyc04g056360	WRKY transcription factor 36	WRKY	WRKY36	[84]
Solyc04g072070	WRKY transcription factor 55	WRKY	WRKY55	[84]			0.3355	0.38	0.2705	0.1865		29.5077	1.63267	0.820333	5.31033
Solyc04g078550	WRKY transcription factor 7	WRKY	WRKY7	[84]	AT4G24240	WRKY7-ATWRKY7	80.0695	97.198	53.859	56.775		286.888	61.488	66.388	62.3317
Solyc05g007110	WRKY transcription factor 76	WRKY	WRKY76	[84]			0.0095	0.0325	0.0135	0		0.00633333	0.006	0.0713333	1.034
Solyc05g012500	WRKY transcription factor 57	WRKY	WRKY57	[84]	AT1G69310	ATWRKY57-WRKY57	10.5685	24.4635	27.5045	25.037		25.1163	14.722	26.0473	30.1233
Solyc05g012770	WRKY transcription factor 4	WRKY	WRKY4	[84]	AT1G13960	WRKY4	13.9115	32.774	30.589	21.0545		21.3047	31.5627	24.6857	27.7737
Solyc05g014040	WRKY transcription factor 70	WRKY	WRKY70	[84]
Solyc05g015850	WRKY transcription factor 75	WRKY	WRKY75	[84]	AT5G13080	WRKY75-ATWRKY75	2.0555	3.9565	5.307	2.9155		33.1857	8.269	2.65867	12.4097
Solyc05g045710	WRKY transcription factor 65	WRKY	WRKY65	[84]
Solyc05g045800	WRKY transcription factor 67	WRKY	WRKY67	[84]
Solyc05g045880	WRKY transcription factor 66	WRKY	WRKY66	[84]
Solyc05g045927	DNA-binding WRKY	WRKY	WRKY82
Solyc05g050050	WRKY transcription factor 63	WRKY	WRKY63	[84]
Solyc05g050060	WRKY transcription factor 64	WRKY	WRKY64	[84]
Solyc05g050300	WRKY transcription factor	WRKY	WRKY60	[84]
Solyc05g050330	WRKY transcription factor 60	WRKY	WRKY59	[84]			12.8155	11.745	9.55	10.0955		5.86367	8.41867	7.36133	10.6203
Solyc05g050340	WRKY transcription factor 58	WRKY	WRKY58	[84]			5.3835	10.143	8.611	8.144		7.74567	9.78633	4.13867	8.382
Solyc05g053380	WRKY transcription factor 48	WRKY	WRKY48	[84]	AT5G49520	ATWRKY48-WRKY48	2.713	5.144	8.8675	7.8935		47.663	3.18233	4.86633	3.90667
Solyc05g055750	WRKY transcription factor 34	WRKY	WRKY34	[84]			1.2385	2.2175	0.838	0.7215		1.63867	0.678667	0.279667	0.355
Solyc06g008610	WRKY transcription factor 21	WRKY	WRKY21	[84]	AT2G30590	WRKY21	26.884	49.706	44.2015	54.805		20.0207	45.6723	50.272	58.405
Solyc06g048870	WRKY transcription factor 19	WRKY	WRKY19	[84]	AT2G40740	ATWRKY55-WRKY55
Solyc06g066370	WRKY transcription factor 31	WRKY	WRKY31	[84]	AT2G38470	WRKY33-ATWRKY33	59.648	53.875	42.075	56.3795		496.742	82.576	41.052	64.834
Solyc06g068460	WRKY transcription factor 40	WRKY	WRKY40	[84]	AT1G80840	ATWRKY40-WRKY40	71.6985	40.7945	27.229	34.8935		599.584	44.5183	26.7997	36.0743
Solyc06g070990	WRKY transcription factor 74	WRKY	WRKY74	[84]	AT1G18860/AT5G15130	WRKY61-ATWRKY61/ATWRKY72-WRKY72	0	2.219	0.483	0.507		0.0566667	1.41133	1.78533	1.32533
Solyc07g005650	WRKY transcription factor 32	WRKY	WRKY32	[84]	AT4G30935	WRKY32-ATWRKY32	9.937	8.6175	10.6195	10.29		8.76967	8.58433	8.29367	10.5257
Solyc07g047960	WRKY transcription factor 1	WRKY	WRKY1	[84]			11.1545	9.669	13.712	17.1295		8.474	12.5807	8.749	13.8593
Solyc07g051840	WRKY transcription factor 17	WRKY	WRKY17	[84]			4.159	25.794	27.628	19.7565		12.478	10.527	12.617	20.3
Solyc07g055280	WRKY transcription factor 78	WRKY	WRKY78	[84]	AT3G58710	WRKY69-ATWRKY69	7.139	7.0465	6.7715	7.2465		7.19233	11.329	10.4617	15.2193
Solyc07g056280	WRKY transcription factor 30	WRKY	WRKY30	[84]	AT1G29860	ATWRKY71-EXB1-WRKY71-	1.95	42.8225	34.074	47.25		7.26333	4.10833	5.18933	9.38533
Solyc07g065260	WRKY transcription factor 18	WRKY	WRKY18	[84]			48.296	51.622	67.9535	66.2625		34.1287	55.396	46.0823	49.58
Solyc07g066220	WRKY transcription factor 2	WRKY	WRKY2	[84]	AT5G56270	ATWRKY2-WRKY2	177.132	152.148	145.144	160.909		193.461	100.979	126.742	169.661
Solyc08g006320	WRKY transcription factor 11	WRKY	WRKY11	[84]	AT4G31550	ATWRKY11-WRKY11	74.8155	87.584	35.1435	45.1155		273.867	80.0797	72.3597	83.4267
Solyc08g008280	WRKY transcription factor 53	WRKY	WRKY53	[84]	AT4G23810	ATWRKY53-WRKY53	7.795	6.8465	4.7465	6.47		499.376	3.478	5.33467	13.645
Solyc08g067340	WRKY transcription factor 46	WRKY	WRKY46	[84]			0.08	0.3565	0.523	2.7425		29.4	2.805	0.391	9.96767
Solyc08g067360	WRKY transcription factor 45	WRKY	WRKY45	[84]			0	0.14	0.0995	0.158		5.331	2.89567	0.0633333	1.72633
Solyc08g081610	WRKY family transcription factor	WRKY	WRKY29	[84]	AT4G23550	ATWRKY29-WRKY29	0.478	5.2485	4.766	4.475		1.802	7.111	2.02767	4.81233
Solyc08g081630	WRKY transcription factor 56	WRKY	WRKY56	[84]	AT1G64000/AT5G41570	WRKY56-ATWRKY56/WRKY24-ATWRKY24	0	0	0.0095	0.5815		0.0566667	0	0.215	2.31367
Solyc08g082110	WRKY transcription factor 54	WRKY	WRKY54	[84]	AT4G23810	ATWRKY53-WRKY53	4.729	9.6395	4.3965	5.1205		139.805	4.92267	3.90533	10.4467
Solyc09g010960	WRKY transcription factor 49	WRKY	WRKY49	[84]	AT5G43290	WRKY49-ATWRKY49	0.271	0.8005	0.0175	0.029		0.748	0.126667	1.03467	2.494
Solyc09g014990	WRKY transcription factor 33	WRKY	WRKY33	[84]	AT2G38470	WRKY33-ATWRKY33	7.431	8.909	4.096	3.534		183.018	15.5583	4.253	10.5717
Solyc09g015770	WRKY transcription factor 81	WRKY	WRKY81	[84]	AT3G56400	ATWRKY70-WRKY70	24.949	1.4155	5.536	27.163		333.674	14.002	4.659	29.7147
Solyc09g066010	WRKY transcription factor 24	WRKY	WRKY24	[84]	AT2G30590	WRKY21	25.0145	25.3085	37.582	43.7125		11.0767	13.8943	40.2553	44.7577
Solyc10g005680	WRKY transcription factor 15	WRKY	WRKY15	[84]
Solyc10g007970	WRKY transcription factor 77	WRKY	WRKY77	[84]			0.0285	0.038	0.0265	0		0.0503333	0.209333	0.917667	0.438667
Solyc10g009550	WRKY transcription factor 42	WRKY	WRKY42	[84]			5.9165	12.769	5.3695	5.7945		160.889	11.032	3.63533	6.60967
Solyc10g011910	WRKY transcription factor 25	WRKY	WRKY25	[84]	AT4G01250	AtWRKY22-WRKY22	1.937	1.7705	0.502	0.6565		86.358	7.629	2.148	2.94667
Solyc10g084380	WRKY transcription factor 44	WRKY	WRKY44	[84]			18.1235	5.293	7.317	3.2205		19.523	3.51267	5.16033	3.65
Solyc12g006170	WRKY transcription factor 14	WRKY	WRKY14	[84]			28.096	16.9075	18.362	21.321		20.3393	25.3893	24.1397	30.6397
Solyc12g011200	WRKY transcription factor 28	WRKY	WRKY28	[84]			1.8805	4.3815	3.588	5.0575		0.320667	4.76267	7.62	7.921
Solyc12g014610	WRKY transcription factor 20	WRKY	WRKY20	[84]	AT4G26640	AtWRKY20-WRKY20	51.8685	40.1715	44.907	43.991		31.9167	43.38	36.672	43.4063
Solyc12g042590	WRKY transcription factor 43	WRKY	WRKY43	[84]
Solyc12g056745	WRKY transcription factor	WRKY	WRKY83
Solyc12g056750	WRKY transcription factor 61	WRKY	WRKY61	[84]			0	0.0095	0.036	0.129		1.45467	0.676	0.139333	0.88
Solyc12g096350	WRKY transcription factor 10	WRKY	WRKY10	[84]			0.9765	1.557	1.2285	2.429		4.13433	1.87467	3.54667	3.503
Solyc01g010240	CRABS CLAW a	YABBY	CRCa	[85]	AT1G69180	CRC
Solyc01g091010	CRABS CLAW-like protein1a	YABBY	YABBY1a	[85]	AT2G45190	YAB1-AFO-FIL-	0	0	0.016	0.238		0	0	0.871333	0.205
Solyc05g005240	YABBY gene	YABBY	INO	[85]	AT1G23420	INO
Solyc05g012050	CRABS CLAW b	YABBY	CRCb	[85]	AT1G69180	CRC
Solyc06g073920	CRABS CLAW-like protein 2a	YABBY	YABBY2a	[85]	AT1G08465	YAB2	3.709	1.5435	0.873	0.6535		0.0816667	0.00666667	0	0
Solyc07g008180	CRABS CLAW-like protein 5a	YABBY	YABBY5a	[85]	AT2G26580	YAB5
Solyc08g079100	CRABS CLAW 1b	YABBY	YABBY1b	[85]
Solyc11g071810	fasciated	YABBY	FASCIATED	[85]			2.711	1.0445	0.6125	0.7245		0.172	0.297667	0.142	0.0986667
Solyc12g009580	CRABS CLAW 5b	YABBY	YABBY5b	[85]			4.4595	1.317	0.3145	0.1685		0.0783333	0.207667	0.136667	0.168
Solyc01g107410	Pathogenesis-related homeodomain protein	Z-Others	Others-HB-PHD		AT3G19510	HAT3.1	44.85	40.3375	27.5085	31.4		30.792	35.261	48.3177	41.6703
Solyc02g069720	LSD1 zinc finger family protein	Z-Others	Others-LSD		AT4G20380	CHS4-LSD1	65.7585	55.576	46.8555	50.4565		51.9947	55.9473	38.5177	47.7923
Solyc02g077450	Vascular plant one zinc finger transcription factor protein	Z-Others	Others-VOZ				70.586	51.328	50.4705	60.1985		44.198	47.184	51.0947	69.562
Solyc02g078270	LSD1 zinc finger family protein	Z-Others	Others-LSD				17.2405	19.624	14.4985	15.575		14.2297	17.5707	17.7633	18.6197
Solyc02g084000	Transcription initiation factor TFIID subunit 14b	Z-Others	Others-YEATS				12.8865	12.4175	10.184	13.857		8.83433	12.8523	10.6693	11.746
Solyc03g082480	GRF1-interacting factor 1	Z-Others	SSXT	[81]			16.7615	46.5455	23.9655	35.0755		23.6973	27.8533	30.035	24.5097
Solyc03g083110	AP2/B3 transcription factor family protein	Z-Others	Others-RAV		AT1G50680/AT1G51120/AT4G06634	AtYY1-YY1
Solyc03g118420	NF-X1-type zinc finger protein NFXL1	Z-Others	Others-NF-X1		AT1G10170	NFXL1-ATNFXL1	119.166	81.707	185.55	152.72		51.4487	77.769	119.237	144.624
Solyc04g007000	AP2/B3 transcription factor family protein	Z-Others	Others-RAV				199.695	8.817	8.9545	36.827		7.41633	1.024	0.306	10.7057
Solyc04g009820	GRF1-interacting factor 1	Z-Others	SSXT	[81]	AT5G28640	GIF-GIF1-ATGIF1-AN3	1.5015	2.7215	1.857	11.2155		0.983	2.082	5.67067	2.77733
Solyc04g077290	Transcription initiation factor TFIID subunit 14b	Z-Others	Others-YEATS		AT5G45600	TAF14B-YAF9a-GAS41-	11.7755	12.407	10.01	9.639		9.377	11.515	12.2457	9.40133
Solyc05g007100	Single-stranded DNA-binding protein WHY1, chloroplastic	Z-Others	Others-Whirly		AT1G14410/AT2G02740	PTAC1-ATWHY1-WHY1/PTAC11-ATWHY3-WHY3-	14.5615	21.394	15.419	20.427		11.1263	22.0513	19.3983	18.7123
Solyc05g009790	AP2/B3 transcription factor family protein	Z-Others	Others-RAV		AT1G13260/AT1G25560/AT1G68840/AT3G25730	AtRAV1-RAV1-EDF4/EDF1-AtTEM1-TEM1/AtRAV2-EDF2-TEM2-RAP2.8/EDF3	33.3025	54.1865	10.7025	8.4955		316.923	27.048	22.4703	23.2483
Solyc06g009390	Protein phosphatase-2C	Z-Others	Others-DBP		AT3G62260	PP2C49	5.33	5.978	5.345	4.118		4.992	7.626	4.511	6.75533
Solyc06g051570	NF-X1-type zinc finger protein NFXL2	Z-Others	Others-NF-X1		AT5G05660	ATNFXL2-EBI-NFXL2-	23.597	19.7775	23.2775	20.847		16.873	22.0403	24.4593	25.756
Solyc06g065610	Protein phosphatase 2C	Z-Others	Others-DBP		AT2G25620	DBP1-AtDBP1	18.552	31.0875	16.7925	20.457		19.933	26.4037	25.808	21.7243
Solyc06g072270	RING/U-box superfamily protein	Z-Others	Others-C2H2-MYB-HB		AT1G64570	DUO3	14.042	12.0095	13.972	12.8575		9.93867	11.822	11.959	14.4687
Solyc07g007220	Protein phosphatase 2C	Z-Others	Others-DBP				6.508	15.9215	13.968	14.876		18.0667	38.881	20.247	26.5373
Solyc07g008730	Pathogenesis-related homeodomain protein	Z-Others	Others-HB-PHD		AT4G29940	PRHA	10.4495	9.5865	9.5515	8.709		8.06167	8.74767	10.1873	9.86933
Solyc07g020710	Protein tesmin/TSO1-like CXC 5	Z-Others	CPP5La	putative novel			11.9385	16.721	12.903	14.3805		13.1457	20.582	15.7047	17.5577
Solyc07g021550	Protein EFFECTOR OF TRANSCRIPTION 2	Z-Others	Others-HRT		AT5G56780	ET2-ATET2	22.6755	14.258	18.1965	22.773		17.0517	14.0593	15.2167	18.1827
Solyc07g054450	protein ULTRAPETALA 1-like	Z-Others	Others-ULT		AT2G20825/AT4G28190	ULT2/ULT1-ULT	22.9975	31.108	17.5235	22.211		10.0567	18.2197	21.056	17.348
Solyc07g062050	SH2 domain-containing protein A	Z-Others	Others-STAT		AT1G17040/AT1G78540	SHA-ATSHA-STATLA/ATSHB-SHB-STATLB	18.843	13.663	17.218	19.3965		21.0377	16.3003	18.0637	18.871
Solyc07g063670	hypothetical protein	Z-Others	Others-RWP-RK
Solyc08g067150	CRC domain-containing protein TSO1	Z-Others	CPP1L	putative novel			19.6515	50.939	50.177	52.763		40.7487	53.895	75.79	59.5747
Solyc08g077060	Zinc finger, LSD1-type	Z-Others	Others-LSD		AT1G32540	LOL1	97.9905	84.3415	41.5105	54.2875		40.5613	24.407	109.562	70.6597
Solyc09g007500	DNA-binding protein S1FA	Z-Others	Others-S1Fa-like		AT3G53370		83.057	57.901	35.5265	44.4865		37.4523	42.5583	43.055	41.7
Solyc09g082500	Tesmin/TSO1-like CXC domain-containing protein	Z-Others	CPP2	putative novel	AT4G14770	SOL2-ATTCX2-TCX2-	30.0185	34.245	25.8275	28.3735		45.989	18.1827	57.5467	38.3457
Solyc10g005900	BSD domain	Z-Others	Others-BSD		AT1G55750		38.9535	34.5855	35.9835	41.338		29.1017	41.8517	39.8033	40.4177
Solyc10g008880	Zinc finger transcription factor 56	Z-Others	Others-VOZ		AT1G28520	VOZ1-ATVOZ1	39.4265	39.027	28.7585	30.4125		44.9953	29.708	22.103	27.5063
Solyc10g009280	GRF1-interacting factor 2	Z-Others	SSXT	[81]	AT4G00850	GIF3	16.1155	15.5165	13.3175	13.9795		13.036	12.2187	15.097	15.9707
Solyc10g086065	DNA-binding protein S1FA	Z-Others	Others-S1Fa-like				50.3805	83.234	39.097	42.786		45.8823	49.6927	43.739	38.615
Solyc11g006230	GRF1-interacting factor 1	Z-Others	SSXT	[81]			8.3425	0.5725	0.523	14.3925		1.25467	0.194	1.788	1.73633
Solyc11g044750	Single-stranded DNA-binding protein	Z-Others	Others-Whirly		AT1G71260	WHY2-ATWHY2	32.501	31.161	22.875	29.1195		25.6073	32.954	31.5283	29.02
Solyc12g007180	Protein tesmin/TSO1-like CXC 5	Z-Others	CPP5Lb	putative novel	AT4G29000	TCX5	6.2755	4.836	4.992	4.726		5.372	5.325	6.81333	5.453
Solyc12g010370	protein ULTRAPETALA 1-like	Z-Others	Others-ULT
Solyc12g010755	protein ULTRAPETALA 1-like	Z-Others	Others-ULT
Solyc01g014970	Zinc-finger homeodomain protein 4	ZF-HD	ZFHD1
Solyc01g102980	zinc-finger homeodomain protein 4	ZF-HD	ZFHD2		AT1G14440	FTM2-HB31-AtHB31-ZHD4	1.32	1.3005	0.868	3.949		0.551333	0.318	0.611667	0.471667
Solyc01g103810	Zinc-finger homeodomain protein 3	ZF-HD	ZFHD3
Solyc01g103820	Zinc-finger homeodomain protein 3	ZF-HD	ZFHD4
Solyc01g103830	Zinc finger-homeodomain protein 1	ZF-HD	ZFHD5
Solyc01g103840	Zinc-finger homeodomain protein 6	ZF-HD	ZFHD6
Solyc01g150154	Zinc-finger homeodomain protein 6	ZF-HD	ZFHD7
Solyc01g150155	zinc-finger homeodomain protein 1-like	ZF-HD	ZFHD8
Solyc02g067310	Zinc-finger homeodomain protein 10	ZF-HD	ZFHD9		AT1G69600/AT3G28920	ATHB29-ZFHD1-ZHD11/ZHD9-AtHB34-HB34-	16.2465	26.327	13.3975	21.4195		5.188	3.768	2.77167	4.80633
Solyc02g067320	Zinc-finger homeodomain protein 10	ZF-HD	ZFHD10		AT1G69600	ATHB29-ZFHD1-ZHD11-	35.8975	41.756	25.501	38.345		9.196	6.61233	5.32133	7.12267
Solyc02g067330	Zinc finger homeodomain protein 1	ZF-HD	ZFHD11
Solyc02g085160	Zinc-finger homeodomain protein 6	ZF-HD	ZFHD12		AT2G18350	ZHD6-HB24-AtHB24-	13.2695	22.479	14.214	17.739		10.256	6.65267	6.27833	5.25567
Solyc02g087970	Mini zinc finger protein	ZF-HD	ZFHD13				0.038	0.033	0.046	0.357		2.44733	0.430333	2.39	3.57033
Solyc03g061620	Zinc finger homeodomain protein 1	ZF-HD	ZFHD14		AT3G28917	MIF2
Solyc03g098060	zinc-finger homeodomain protein 11-like	ZF-HD	ZFHD15				60.1665	10.134	2.0965	5.23		8.03833	2.26167	4.318	1.77133
Solyc03g116070	Mini zinc finger protein 1	ZF-HD	ZFHD16		AT1G18835/AT1G74660	MIF3/MIF1	2.3435	2.5345	0.4225	0.5655		4.096	6.841	4.76933	5.787
Solyc04g014260	Zinc-finger homeodomain protein 1	ZF-HD	ZFHD17		AT4G24660/AT5G65410	MEE68-HB22-ATHB22-ZHD2/ZFHD2-ATHB25-HB25-ZHD1	0.6685	0.6095	0.764	2.8		0.0973333	0.0716667	0.237667	0.129
Solyc04g074990	Zinc-finger homeodomain protein 1	ZF-HD	ZFHD18				4.1985	4.605	0.566	5.4985		0.907667	0.408	0.119667	0.0986667
Solyc04g080490	Zinc-finger homeodomain protein 6	ZF-HD	ZFHD19				11.483	4.418	3.6545	8.836		3.34167	0.678333	0.763	0.383667
Solyc05g007580	Zinc-finger homeodomain protein 11	ZF-HD	ZFHD20		AT5G15210	ATHB30-HB30-ZFHD3-ZHD8	2.1825	84.3505	66.053	75.2535		6.429	27.2657	11.1507	23.2457
Solyc05g018740	Zinc-finger homeodomain protein 3	ZF-HD	ZFHD21
Solyc05g020000	Zinc-finger homeodomain protein 3	ZF-HD	ZFHD22
Solyc05g051420	zinc-finger homeodomain protein 1-like	ZF-HD	ZFHD23
Solyc09g089550	Zinc-finger homeodomain protein 1	ZF-HD	ZFHD24				16.069	8.6925	10.622	11.0265		7.91667	7.01167	9.16533	18.039

## Sheet: TableS2
Table S2. Putative tomato TF genes whose Arabidopsis thaliana orthologs have been linked to tissue regeneration in previous studies
Gene id	ITAG4 annotation	Family	Gene name	Arabidopsis thaliana gene ID	Arabidopsisthalianagenename	Reference
Solyc05g051380	AP2-like ethylene-responsive transcription factor AIL6	AP2-EREBP	PLT7	AT5G65510	PLT7, AIL7	[5]
Solyc07g018290	AP2-like ethylene-responsive transcription factor	AP2-EREBP	PLT5	AT5G57390	CHO1, PLT5, EMK, AIL5	[5]
Solyc11g008560	AP2-like ethylene-responsive transcription factor BBM	AP2-EREBP	BBM	AT5G17430	PLT4, BBM	[105]
Solyc11g010710	AP2-like ethylene-responsive transcription factor	AP2-EREBP	PLT3	AT5G10510	AIL6, PLT3	[5]
Solyc11g061750	AP2-like ethylene-responsive transcription factor PLT1	AP2-EREBP	PLT2	AT1G51190	PLT2	[106]
Solyc04g081240	Auxin Response Factor 5	ARF	ARF5	AT1G19850	IAA24, MP, ARF5	[5]
Solyc07g042260	Auxin Response Factor 7	ARF	ARF11/7	AT1G19220 / AT5G20730	IAA22, ARF19, ARF11 / NPH4, MSG1, IAA21, IAA23	[5]
Solyc11g069190	Auxin Response Factor 4	ARF	ARF4	AT5G60450	ARF4	[110]
Solyc01g065540	Two-component response regulator	ARR-B	ARR-B1	AT3G16857 / AT4G16110	RR1, ARR1 / ARR2, RR2	[5]
Solyc05g054390	Two-component response regulator	ARR-B	ARR-B2	AT3G16857 / AT4G16110	RR1, ARR1 / ARR2, RR2	[5]
Solyc06g061030	Two-component response regulator APRR2-like protein	ARR-B	ARR-B12	AT4G18020	PRR2, APRR2	[5]
Solyc07g005140	Two-component response regulator	ARR-B	ARR-B4	AT2G25180	ARR12, AtARR12, RR12	[5]
Solyc08g077230	Two-component response regulator APRR2-like protein	ARR-B	ARR-B11	AT4G18020	PRR2, APRR2	[5]
Solyc12g010330	Two-component response regulator	ARR-B	ARR-B3	AT2G25180 / AT5G58080	ARR12, AtARR12, RR12 / ARR18, RR18	[5]
Solyc01g108140	B3 domain-containing protein	B3	B3-14	AT3G19184	REM1	[5]
Solyc02g090170	B3 domain-containing protein	B3	B3-26	AT4G33280	nosymbolavailable	[5]
Solyc02g094460	B3 domain-containing protein	B3	B3-28	AT3G26790	FUS3	[107]
Solyc06g082520	B3 domain-containing protein	B3	B3-46	AT2G30470	VAL1, HSI2	[5]
Solyc06g083590	ABI3	B3	B3-47	AT3G24650	ABI3, AtABI3, SIS10	[105]
Solyc06g083600	B3 domain-containing transcription factor FUS3	B3	B3-48	AT3G24650	ABI3, AtABI3, SIS10	[105]
Solyc09g010230	B3 domain-containing protein	B3	B3-64	AT2G36080 / AT3G11580 / AT5G06250	NGAL1 / NGAL2 / NGAL3	[5]
Solyc04g081170	GAGA-binding transcriptional activator	BBR-BPC	BPC6	AT5G42520	BBR / BPC6, ATBPC6, BPC6	[5]
Solyc08g076230	GAGA-binding transcriptional activator	BBR-BPC	BPC7	AT2G35550	BPC7, ATBPC7, BBR	[5]
Solyc08g082940	Transcription factor	bHLH	bHLH173	AT1G64625	LL1, FST, LHL3	[100]
Solyc09g065820	bHLH transcription factor 059	bHLH	bHLH119	AT4G02590	bHLH059, PFB1, UNE12	[5]
Solyc11g068960	Transcription factor LHW	bHLH	bHLH179	AT2G27230	LHW	[108]
Solyc01g008730	BZIP transcription factor	bZIP	bZIP01	AT3G12250 / AT5G06950 / AT5G06960	BZIP45, TGA6 / AtTGA2, AHBP, 1B, TGA2 / OBF5, TGA5	[5]
Solyc02g084860	BZIP transcription factor	bZIP	bZIP15/19	AT4G34590	BZIP11, ATB2, GBF6, AtbZIP11	[5]
Solyc04g011670	Transcription factor TGA7	bZIP	bZIP27	AT5G10030 / AT5G65210	TGA4, OBF4 / TGA1	[5]
Solyc09g009490	ABSCISIC ACID-INSENSITIVE 5-like protein 4	bZIP	bZIP52	AT2G36270	DPBF1, AtABI5, GIA1, ABI5	[5]
Solyc11g064950	BZIP transcription factor	bZIP	bZIP66	AT3G12250 / AT5G06960 / AT5G06950	BZIP45, TGA6 / AtTGA2, AHBP, 1B, TGA2 / OBF5, TGA5	[5]
Solyc05g009180	Zinc finger protein 8	C2H2		AT1G68360	GIS3	[103]
Solyc09g007550	Protein indeterminate-domain 12	C2H2		AT5G03150	JKD	[5]
Solyc09g065670	Protein indeterminate-domain 12	C2H2		AT4G02670	IDD12, AtIDD12	[5]
Solyc10g084180	Protein indeterminate-domain 2	C2H2		AT5G03150	JKD	[5]
Solyc07g053750	Zinc finger transcription factor 50	C3H	C3H50	AT1G03790	TZF4, SOM, AtTZF4	[5]
Solyc02g090220	Dof zinc finger protein PBF	Dof	DOF34	AT3G50410	OBP1, DOF3.4	[5]
Solyc03g112930	Dof zinc finger protein	Dof	DOF18	AT5G62940	DOF5.6, HCA2	[102]
Solyc06g071480	Dof zinc finger protein PBF	Dof	DOF17	AT5G62940	DOF5.6, HCA2	[102]
Solyc06g150130	Dof zinc finger protein PBF	Dof	DOF1	AT5G60850	AtDOF5.4, OBP4	[109]
Solyc01g007760	Transcription factor E2FA	E2F/DP	E2F3	AT2G36010	E2F3, ATE2FA	[5]
Solyc03g026270	CRT binding factor 3	ERF	ERF30	AT4G25470 / AT4G25480 / AT4G25490	DREB1C, CBF2, ATCBF2, FTQ4 / CBF3, DREB1A, ATCBF3 / CBF1, DREB1B, ATCBF1	[5]
Solyc03g124110	Dehydration-responsive element-binding transcription factor	ERF	ERF47	AT5G51990	CBF4, DREB1D	[5]
Solyc04g072300	Ethylene-responsive transcription factor	ERF	WIND3	AT1G12890	ER55, WIND3	[104]
Solyc04g072900	dehydration-responsive element binding protein 3	ERF	WIND1	AT1G78080	AtWIND1, WIND1, RAP2.4	[5]
Solyc04g078640	Ethylene-responsive transcription factor RAP2-1	ERF	ERF57	AT3G50260 / AT5G67190	DEAR1, ATERF#011, CEJ1 / DEAR2	[5]
Solyc05g013540	LEAFLESS	ERF	ERF60	AT1G12980 / AT1G24590	ESR1, DRN / DRN, LIKE, DRNL, BOL, ESR2	[5]
Solyc06g050520	dehydration responsive element binding protein 1	ERF	ERF70	AT2G40340 / AT5G05410	DREB2C, AtERF48 / DREB2, DREB2A	[5]
Solyc06g065820	Ethylene Response Factor H.1	ERF	ERF74	AT5G25190	ESE3	[5]
Solyc10g050970	Ethylene Response Factor D.4	ERF	ERF109	AT4G34410	ERF109, RRTF1	[111]
Solyc11g012980	Ethylene-responsive transcription factor	ERF	ERF118	AT1G21910 / AT1G44830	DREB26 / EPI1, ERF014, AtERF014	[5]
Solyc12g042210	Ethylene-responsive transcription factor	ERF	ERF130	AT5G61890	ERF114	[112]
Solyc07g038160	GATA transcription factor 16	GATA	GATA21/22	AT4G26150 / AT5G56860	CGA1, GNL, GATA22 / GNC, GATA21	[5]
Solyc07g052900	DNA-binding storekeeper transcriptional regulator	GeBP	GeBP	AT1G61730 / AT4G00390		[113]
Solyc02g092370	Transcription factor GRAS	GRAS	SHR	AT4G37650	SHR, SGR7, EAL1	[114]
Solyc07g047950	Transcription factor GRAS	GRAS	PAT1	AT5G48150	PAT1	[115]
Solyc10g074680	Protein SCARECROW	GRAS	SCL	AT3G54220	SGR1, SCR	[116]
Solyc07g041640	Growth-regulating factor 5	GRF	GRF4	AT3G13960	GRF5, AtGRF5	[117]
Solyc02g024070	Homeobox leucine-zipper protein	HB-HD-ZIP		AT1G30490 / AT2G34710	ATHB9, PHV / ATHB14, PHB, PHB, 1D, ATHB, 14	[5]
Solyc05g051460	Homeobox-leucine zipper protein HOX4	HB-HD-ZIP		AT2G22430 / AT4G40060 / AT5G65310	HB6, ATHB6 / ATHB16, ATHB, 16, HB16 / HB5, ATHB, 5, ATHB5	[5]
Solyc11g010270	Homeobox-leucine zipper protein HOX4	HB-HD-ZIP		AT2G22430 / AT5G65310	HB6, ATHB6 / HB5, ATHB, 5, ATHB5	[5]
Solyc11g069470	Homeobox leucine-zipper protein	HB-HD-ZIP		AT5G60690	IFL, REV, AVB1, IFL1	[5]
Solyc02g090820	Heat stress transcription factor B-1	HSF	HSF5	AT4G36990	ATHSF4, TBF1, AT, HSFB1, HSF4	[5]
Solyc03g026020	Heat shock transcription factor	HSF	HSF7	AT5G62020	HSFB2A, AT, HSFB2A	[5]
Solyc04g078770	Heat stress transcription factor B-4	HSF	HSF10	AT1G46264	AT, HSFB4, HSFB4, SCZ,	[5]
Solyc08g062960	Heat shock transcription factor	HSF	HSF16	AT2G26150	ATHSFA2, HSFA2	[5]
Solyc08g080540	Heat stress transcription factor B-2b	HSF	HSF18	AT4G11660	HSFB2B, HSF7, AT, HSFB2B	[5]
Solyc01g091400	LOB domain-containing protein 31	LBD	LBD19	AT2G45410 / AT4G00210	LBD19 / LBD31	[5]
Solyc01g091420	LOB domain-containing protein 18	LBD	LBD18	AT2G45420	LBD18	[5]
Solyc09g066260	LOB domain-containing protein	LBD		AT2G42430	ASL18, LBD16	[5]
Solyc11g008830	LOB domain-containing protein 6	LBD	AS2	AT1G65620	AS2	[5]
Solyc01g087990	MADS-box transcription factor	MADS		AT5G13790	AGL15	[118]
Solyc01g093960	MADS box transcription factor	MADS		AT2G45650	AGL6, RSB1	[5]
Solyc01g057910	R2R3MYB transcription factor 2	MYB	MYB78	AT3G06490 / AT5G49620	AtMYB108, BOS1, MYB108 / MYB78, AtMYB78	[5]
Solyc02g092930	R2R3MYB transcription factor 44	MYB	MYB73	AT4G37260 / AT5G67300	ATMYB73, MYB73 / MYBR1, ATMYBR1, ATMYB44, MYB44	[5]
Solyc03g116100	R2R3MYB transcription factor 31	MYB	MYB31	AT3G47600 / AT5G62470	MYB94, ATMYBCP70, ATMYB94 / MYB96, MYBCOV1, ATMYB96	[5]
Solyc04g078420	R2R3MYB transcription factor 70	MYB	MYB70	AT4G37260	ATMYB73, MYB73	[5]
Solyc05g007160	R2R3MYB transcription factor 110	MYB	MYB88	AT1G14350 / AT2G02820	AtMYB124, FLP, MYB124 / MYB88, AtMYB88	[5]
Solyc10g086250	R2R3MYB transcription factor 75	MYB	MYB90	AT1G56650 / AT1G66370 / AT1G66380 / AT1G66390	SIAA1, AtPAP1, MYB75, ATMYB75 / MYB113, AtMYB113 / AtMYB114, MYB114 / ATMYB90, MYB90, PAP2	[5]
Solyc10g086260	anthocyanin 1	MYB	MYB114	AT1G66370 / AT1G66380 / AT1G66390	MYB113, AtMYB113 / AtMYB114, MYB114 / ATMYB90, MYB90, PAP2	[5]
Solyc10g086290	R2R3MYB transcription factor 114	MYB	MYB75	AT1G56650 / AT1G66370 / AT1G66380 / AT1G66390	MYB113, AtMYB113 / AtMYB114, MYB114 / ATMYB90, MYB90, PAP2	[5]
Solyc02g088180	NAC domain-containing protein	NAC	NAC019	AT3G29035 / AT5G39610	NAC3, ANAC059, ATNAC3, ORS1 / ANAC092, ATNAC2, NAC2, NAC6	[5]
Solyc03g080090	NAC domain-containing protein 86	NAC	NAC025	AT3G49530 / AT5G24590	ANAC062, NAC062, NTL6 / ANAC91, TIP, ANAC091	[5]
Solyc05g055470	NAC domain-containing protein 13	NAC	NAC043	AT3G10500 / AT5G04410	ANAC053, NAC053, NTL4, AIF / NAC2, anac078, NAC78, NTL11	[5]
Solyc06g073050	NAC domain-containing protein 14	NAC	NAC055	AT3G49530 / AT5G24590	ANAC062, NAC062, NTL6 / ANAC91, TIP, ANAC091	[5]
Solyc07g062840	goblet	NAC	NAC062	AT5G53950	CUC2, ATCUC2, ANAC098	[5]
Solyc07g066330	NAC domain-containing protein	NAC	NAC065	AT1G56010	NAC1, ANAC022, anac021	[119]
Solyc08g006020	NAC domain-containing protein	NAC	NAC066/70	AT2G24430	ANAC039, ANAC038, NAC038	[5]
Solyc08g077110	NAC domain-containing protein 45	NAC	NAC071	AT4G17980 / AT5G46590	NAC071 / NAC096	[49]
Solyc11g008000	NAC domain-containing protein 16	NAC	NAC082	AT3G10500	ANAC053, NAC053, NTL4, AIF	[5]
Solyc12g036480	NAC domain	NAC	NAC092	AT3G18400	anac058, NAC058	[5]
Solyc04g015060	Nuclear transcription factor Y subunit B-6	NF-Y	NF-YB6C	AT1G21970 / AT5G47670	EMB212, NF, YB9, AtLEC1, EMB212 / L1L, NF, YB6	[5]
Solyc03g083040	Plant regulator RWP-RK	RWP-RK	NLP3	AT5G53040	RKD4, GRD	[120]
Solyc09g066270	LOB domain-containing protein 20	SBRL	LBD17	AT2G42440 / AT3G58190	LBD17, ASL15 / LBD29, ASL16	[5]
Solyc07g062680	cycloidea	TCP	TCP26	AT3G15030	MEE35, TCP4	[121]
Solyc12g014140	SlTCP3	TCP	TCP36	AT1G53230	TCP3	[121]
Solyc06g051120	trihelix transcription factor ASIL2-like	Trihelix	GT-18	AT5G05550	ENAP2, VFP5	[5]
Solyc02g077390	compound inflorescence	WOX	WOX9	AT2G33880 / AT5G45980	WOX9A, STIP, HB, 3, WOX9 / WOX9B, STPL, WOX8	[5]
Solyc02g082670	WUSCHEL-related homeobox 13	WOX	WOX13	AT4G35550	HB, 4, ATWOX13, WOX13	[5]
Solyc02g083950	wuschel	WOX	WUS	AT2G17950	WUS, WUS1, PGA6	[5]
Solyc03g096300	WUSCHEL-related homeobox protein	WOX	WOX5	AT3G11260	WOX5B, WOX5	[122]
Solyc06g072890	WUSCHEL related homeobox 11	WOX	WOX11	AT3G03660 / AT5G17810	WOX11 / WOX12	[101]
Solyc06g076000	WUSCHEL-related homeobox 5	WOX	WOX2	AT5G59340	WOX2	[123]
Solyc11g072790	WUSCHEL-related homeobox 3b	WOX	WOX3a	AT2G28610	PRS1, WOX3, PRS	[5]
Solyc01g058540	WRKY transcription factor 47	WRKY	WRKY47	AT5G49520	ATWRKY48, WRKY48	[5]
Solyc04g051540	WRKY transcription factor 13	WRKY	WRKY13	AT4G39410	ATWRKY13, WRKY13	[5]
Solyc05g012500	WRKY transcription factor 57	WRKY	WRKY57	AT1G69310	ATWRKY57, WRKY57	[5]
Solyc05g053380	WRKY transcription factor 48	WRKY	WRKY48	AT5G49520	ATWRKY48, WRKY48	[5]
Solyc10g011910	WRKY transcription factor 25	WRKY	WRKY25	AT4G01250	AtWRKY22, WRKY22	[5]
Solyc02g067310	Zinc-finger homeodomain protein 10	ZF-HD	ZFHD9	AT1G69600 / AT3G28920	ATHB29, ZFHD1, ZHD11 / ZHD9, AtHB34, HB34	[5]
Solyc05g009790	AP2/B3 transcription factor family protein	Z-Others	Others-RAV	AT1G13260 / AT1G25560 / AT1G68840 / AT3G25730	AtRAV1, RAV1, EDF4 / EDF1, AtTEM1, TEM1 / AtRAV2, EDF2, TEM2, RAP2.8 / EDF3	[5]
2
FRC4	FRC2
ATNRT2:1
3	CHL1-1
5
5
BP80	BP80B
1

## Sheet: TableS3
Table S3. GO enrichment analyses of deregulated targets of TF genes found in selected gene expression profiles
P11 apical
DEG-up 0-24 h																					DEG-down 0-24h
biological process (BP)					cellular component (CC)					molecular function (MF)					KEGG pathway						biological process (BP)					cellular component (CC)					molecular function (MF)					KEGG pathway
Enrichment FDR	Number of genes	Pathway Genes	Fold Enrichment	Name	Enrichment FDR	Number of genes	Pathway Genes	Fold Enrichment	Name	Enrichment FDR	Number of genes	Pathway Genes	Fold Enrichment	Name	Enrichment FDR	Number of genes	Pathway Genes	Fold Enrichment	Name		Enrichment FDR	Number of genes	Pathway Genes	Fold Enrichment	Name	Enrichment FDR	Number of genes	Pathway Genes	Fold Enrichment	Name	Enrichment FDR	Number of genes	Pathway Genes	Fold Enrichment	Name	Enrichment FDR	Number of genes	Pathway Genes	Fold Enrichment	Name
0.024	12	34	4	Sterol metabolic process	0.012	12	39	3.5	Nucleosome	1.7e-06	113	749	1.7	Oxidoreductase activity	0.00015	14	38	4.2	Glyoxylate and dicarboxylate metabolism		0.004	13	41	4.1	Auxin-activated signaling pathway	0.0083	9	24	4.9	Photosystem I	0.021	6	13	6	Chlorophyll binding	"No significant enrichment found!"
0.032	6	10	6.9	Ornithine metabolic process	0.012	12	41	3.4	DNA packaging complex	0.041	4	6	7.6	DNA replication origin binding	0.0012	77	556	1.6	Biosynthesis of secondary metabolites		0.004	13	42	4	Cellular response to auxin stimulus	0.0084	12	44	3.6	Photosystem	0.021	8	21	5	Hydrolase activity, hydrolyzing N-glycosyl compounds
0.032	14	49	3.3	Steroid metabolic process	0.012	14	54	3	Protein-DNA complex	0.041	9	29	3.6	Xenobiotic transmembrane transporter activity	0.0014	18	74	2.8	Phenylpropanoid biosynthesis		0.004	17	67	3.3	Response to heat						0.021	8	23	4.5	Heat shock protein binding
0.037	12	40	3.4	Steroid biosynthetic process	0.019	23	123	2.1	Cell wall	0.041	14	57	2.8	Protein heterodimerization activity	0.0019	118	968	1.4	Metabolic pathways		0.0042	49	341	1.9	Response to abiotic stimulus						0.021	15	71	2.8	Unfolded protein binding
0.037	14	53	3	DNA-dependent DNA replication	0.019	23	124	2.1	External encapsulating structure	0.041	16	72	2.5	Iron-sulfur cluster binding	0.004	8	21	4.4	Stilbenoid, diarylheptanoid and gingerol biosynthesis		0.017	6	13	6	Photosynthesis, light harvesting in photosystem I						0.021	50	386	1.7	DNA-binding transcription factor activity
0.038	7	16	5	Sterol biosynthetic process	0.023	13	54	2.8	Plant-type cell wall	0.041	16	72	2.5	Metal cluster binding	0.0044	9	27	3.8	Flavonoid biosynthesis		0.017	8	23	4.5	Rhythmic process						0.021	53	418	1.7	Transcription regulator activity
0.038	16	68	2.7	DNA replication	0.04	24	142	1.9	Chromosome	0.041	24	135	2	Iron ion binding	0.0097	22	122	2.1	Carbon metabolism		0.017	8	23	4.5	Circadian rhythm
0.038	23	118	2.2	Alpha-amino acid metabolic process						0.041	30	180	1.9	Heme binding	0.017	9	33	3.1	Glycine, serine and threonine metabolism		0.017	10	33	4	Cellular response to heat
										0.041	69	538	1.5	Transmembrane transporter activity	0.025	8	29	3.2	Carbon fixation in photosynthetic organisms		0.017	75	642	1.5	Reg. of transcription, DNA-templated
										0.041	101	838	1.4	DNA binding							0.017	75	642	1.5	Reg. of nucleic acid-templated transcription
																					0.017	75	642	1.5	Reg. of RNA biosynthetic process
																					0.017	82	719	1.5	Nucleic acid-templated transcription
																					0.017	82	721	1.5	RNA biosynthetic process
																					0.017	79	697	1.5	Reg. of nucleobase-containing compound metabolic process
																					0.017	81	718	1.5	Transcription, DNA-templated
																					0.017	92	828	1.5	Nucleobase-containing compound biosynthetic process
																					0.017	169	1691	1.3	Biological reg.
																					0.017	155	1554	1.3	Reg. of biological proc
																					0.019	80	713	1.5	Reg. of macromolecule biosynthetic process
DEG-up 0-96 h																					DEG-down 0-96 h
biological process (BP)					cellular component (CC)					molecular function (MF)					KEGG pathway						biological process (BP)					cellular component (CC)					molecular function (MF)					KEGG pathway
Enrichment FDR	Number of genes	Pathway Genes	Fold Enrichment	Name	Enrichment FDR	Number of genes	Pathway Genes	Fold Enrichment	Name	Enrichment FDR	Number of genes	Pathway Genes	Fold Enrichment	Name	Enrichment FDR	Number of genes	Pathway Genes	Fold Enrichment	Name		Enrichment FDR	Number of genes	Pathway Genes	Fold Enrichment	Name	Enrichment FDR	Number of genes	Pathway Genes	Fold Enrichment	Name	Enrichment FDR	Number of genes	Pathway Genes	Fold Enrichment	Name	Enrichment FDR	Number of genes	Pathway Genes	Fold Enrichment	Name
8.7e-05	29	118	3	Alpha-amino acid metabolic process	0.013	29	183	1.9	Cell-cell junction	1.1e-07	112	749	1.8	Oxidoreductase activity	4.3e-11	144	968	1.8	Metabolic pathways		0.0011	104	710	1.6	Reg. of cellular macromolecule biosynthetic process	"No significant enrichment found!"					3.4e-05	69	386	1.9	DNA-binding transcription factor activity	"No significant enrichment found!"
0.00012	39	196	2.4	Cellular amino acid metabolic process	0.013	29	183	1.9	Plasmodesma	0.0021	31	162	2.3	Lyase activity	1.4e-10	95	556	2.1	Biosynthesis of secondary metabolites		0.0015	14	41	3.7	Auxin-activated signaling pathway						0.00018	70	418	1.8	Transcription regulator activity
0.00037	61	391	1.9	Carboxylic acid metabolic process	0.013	29	183	1.9	Cell junction	0.0033	24	115	2.5	UDP-glycosyltransferase activity	5.1e-08	17	38	5.4	Glyoxylate and dicarboxylate metabolism		0.0015	93	642	1.6	Reg. of transcription, DNA-templated
0.00058	33	168	2.4	Generation of precursor metabolites and energy	0.013	29	183	1.9	Symplast	0.0056	15	58	3.1	Pyridoxal phosphate binding	2.9e-06	29	122	2.9	Carbon metabolism		0.0015	93	642	1.6	Reg. of nucleic acid-templated transcription
0.00058	61	400	1.8	Oxoacid metabolic process	0.013	29	183	1.9	Anchoring junction	0.0056	15	58	3.1	Vitamin B6 binding	0.00017	11	29	4.6	Carbon fixation in photosynthetic organisms		0.0015	93	642	1.6	Reg. of RNA biosynthetic process
0.00084	88	663	1.6	Small molecule metabolic process	0.013	71	562	1.5	Chloroplast	0.0099	28	160	2.1	Hexosyltransferase activity	0.00032	18	74	3	Phenylpropanoid biosynthesis		0.0017	14	42	3.6	Cellular response to auxin stimulus
0.0025	8	16	6.1	Sterol biosynthetic process	0.013	73	582	1.5	Plastid	0.023	14	60	2.8	Carbon-carbon lyase activity	0.0024	9	27	4	Flavonoid biosynthesis		0.0017	23	95	2.6	Response to auxin
0.0045	11	32	4.2	Alpha-amino acid catabolic process	0.019	29	189	1.9	Extracellular region	0.034	3	3	12.1	Ribulose-bisphosphate carboxylase activity	0.0024	10	33	3.7	Glycine, serine and threonine metabolism		0.0018	98	697	1.5	Reg. of nucleobase-containing compound metabolic process
0.0059	50	341	1.8	Response to abiotic stimulus	0.028	4	7	6.9	Dihydrolipoyl dehydrogenase complex	0.034	9	30	3.6	Amino acid transmembrane transporter activity	0.0099	7	21	4	Stilbenoid, diarylheptanoid and gingerol biosynthesis		0.0033	99	718	1.5	Transcription, DNA-templated
0.0073	5	7	8.7	Erythrose 4-phosphate/phosphoenolpyruvate family amino acid metabolic process	0.037	3	4	9.1	Oxoglutarate dehydrogenase complex	0.048	14	67	2.5	Antiporter activity	0.012	8	28	3.5	Photosynthesis		0.0033	99	719	1.5	Nucleic acid-templated transcription
0.0073	5	7	8.7	L-phenylalanine metabolic process	0.037	88	789	1.4	Cell periphery	0.048	161	1553	1.3	Transferase activity	0.012	11	48	2.8	Cysteine and methionine metabolism		0.0034	99	721	1.5	RNA biosynthetic process
0.0073	12	40	3.6	Cellular amino acid catabolic process											0.029	7	26	3.3	Valine, leucine and isoleucine degradation		0.0047	105	782	1.4	Reg. of gene expression
0.0074	13	47	3.4	Electron transport chain											0.034	7	27	3.1	Arginine and proline metabolism		0.005	113	857	1.4	Reg. of nitrogen compound metabolic process
0.0075	16	67	2.9	Alpha-amino acid biosynthetic process											0.039	4	10	4.9	Nitrogen metabolism		0.01	108	828	1.4	Nucleobase-containing compound biosynthetic process
0.01	20	98	2.5	Organic hydroxy compound metabolic process											0.047	16	101	1.9	Biosynthesis of amino acids
0.013	14	57	3	Carboxylic acid catabolic process											0.048	5	17	3.6	Phenylalanine metabolism
0.018	7	17	5	Photosynthetic electron transport chain											0.048	5	17	3.6	Tryptophan metabolism
0.02	10	34	3.6	Sterol metabolic process											0.048	6	23	3.2	Beta-Alanine metabolism
0.02	17	81	2.5	Cellular amino acid biosynthetic process
DEG-up 0-192 h																					DEG-down 0-192 h
biological process (BP)					cellular component (CC)					molecular function (MF)					KEGG pathway						biological process (BP)					cellular component (CC)					molecular function (MF)					KEGG pathway
Enrichment FDR	Number of genes	Pathway Genes	Fold Enrichment	Name	Enrichment FDR	Number of genes	Pathway Genes	Fold Enrichment	Name	Enrichment FDR	Number of genes	Pathway Genes	Fold Enrichment	Name	Enrichment FDR	Number of genes	Pathway Genes	Fold Enrichment	Name		Enrichment FDR	Number of genes	Pathway Genes	Fold Enrichment	Name	Enrichment FDR	Number of genes	Pathway Genes	Fold Enrichment	Name	Enrichment FDR	Number of genes	Pathway Genes	Fold Enrichment	Name	Enrichment FDR	Number of genes	Pathway Genes	Fold Enrichment	Name
0.00098	17	53	3.9	DNA-dependent DNA replication	0.0062	26	142	2.2	Chromosome	6.1e-06	107	749	1.7	Oxidoreductase activity	1.2e-05	15	38	4.8	Glyoxylate and dicarboxylate metabolism		0.022	12	41	4	Auxin-activated signaling pathway	"No significant enrichment found!"					0.00073	55	386	1.9	DNA-binding transcription factor activity	"No significant enrichment found!"
0.0019	30	146	2.5	Cell cycle process	0.0062	32	189	2	Extracellular region	0.0011	5	5	12	Plus-end-directed microtubule motor activity	0.00015	120	968	1.5	Metabolic pathways		0.022	12	42	3.9	Cellular response to auxin stimulus						0.002	56	418	1.8	Transcription regulator activity
0.0038	19	75	3.1	Nuclear division	0.0062	30	183	2	Cell-cell junction	0.003	104	838	1.5	DNA binding	0.0015	73	556	1.6	Biosynthesis of secondary metabolites		0.028	72	642	1.5	Reg. of transcription, DNA-templated
0.0088	16	62	3.1	Reg. of cell cycle process	0.0062	30	183	2	Plasmodesma	0.024	8	21	4.6	Microtubule motor activity	0.002	17	74	2.8	Phenylpropanoid biosynthesis		0.028	72	642	1.5	Reg. of nucleic acid-templated transcription
0.0088	21	97	2.6	Mitotic cell cycle process	0.0062	30	183	2	Cell junction	0.043	7	18	4.7	Oxidoreductase activity, acting on the CH-NH2 group of donors	0.0028	23	122	2.3	Carbon metabolism		0.028	72	642	1.5	Reg. of RNA biosynthetic process
0.019	23	118	2.3	Alpha-amino acid metabolic process	0.0062	30	183	2	Symplast	0.044	3	3	12	Ribulose-bisphosphate carboxylase activity	0.0035	10	33	3.6	Glycine, serine and threonine metabolism		0.028	79	710	1.5	Reg. of cellular macromolecule biosynthetic process
0.024	6	12	6	Phenylpropanoid biosynthetic process	0.0062	30	183	2	Anchoring junction	0.044	4	6	8	DNA replication origin binding	0.0051	9	29	3.7	Carbon fixation in photosynthetic organisms		0.028	79	719	1.5	Nucleic acid-templated transcription
0.024	7	16	5.3	Sterol biosynthetic process	0.0062	97	789	1.5	Cell periphery	0.044	9	30	3.6	Amino acid transmembrane transporter activity	0.0078	5	10	6	Nitrogen metabolism		0.028	79	721	1.5	RNA biosynthetic process
0.024	10	32	3.8	Alpha-amino acid catabolic process	0.017	7	20	4.2	Kinesin complex						0.011	7	21	4	Stilbenoid, diarylheptanoid and gingerol biosynthesis		0.032	76	697	1.5	Reg. of nucleobase-containing compound metabolic process
0.024	82	670	1.5	Response to stress	0.017	77	647	1.4	Plasma membrane						0.011	8	27	3.6	Flavonoid biosynthesis		0.032	78	718	1.5	Transcription, DNA-templated
0.025	7	17	5	Photosynthetic electron transport chain	0.034	9	35	3.1	Nuclear chromosome												0.045	17	95	2.4	Response to auxin
0.025	8	22	4.4	Microtubule-based movement	0.035	3	4	9	Replication fork protection complex
0.025	19	95	2.4	Organelle fission	0.035	7	23	3.7	Replication fork
0.027	11	40	3.3	Cellular amino acid catabolic process	0.043	5	13	4.6	Nuclear replication fork
0.029	31	196	1.9	Cellular amino acid metabolic process
0.03	9	29	3.7	Movement of cell or subcellular component
0.041	3	3	12	Homologous chromosome pairing at meiosis
P13 apical
DEG-up 0-24 h																					DEG-down 0-24h
biological process (BP)					cellular component (CC)					molecular function (MF)					KEGG pathway						biological process (BP)					cellular component (CC)					molecular function (MF)					KEGG pathway
Enrichment FDR	Number of genes	Pathway Genes	Fold Enrichment	Name	Enrichment FDR	Number of genes	Pathway Genes	Fold Enrichment	Name	Enrichment FDR	Number of genes	Pathway Genes	Fold Enrichment	Name	Enrichment FDR	Number of genes	Pathway Genes	Fold Enrichment	Name		Enrichment FDR	Number of genes	Pathway Genes	Fold Enrichment	Name	Enrichment FDR	Number of genes	Pathway Genes	Fold Enrichment	Name	Enrichment FDR	Number of genes	Pathway Genes	Fold Enrichment	Name	Enrichment FDR	Number of genes	Pathway Genes	Fold Enrichment	Name
4.1e-06	16	68	6.2	DNA replication	0.019	16	142	2.9	Chromosome	0.0018	54	749	1.9	Oxidoreductase activity	0.0075	5	16	8.2	DNA replication		0.00036	13	67	5.6	Response to heat	No significant enrichment found					0.027	6	23	7.6	Heat shock protein binding	No significant enrichment found
3.6e-05	13	53	6.4	DNA-dependent DNA replication	0.028	7	35	5.2	Nuclear chromosome						0.0075	7	32	5.7	Glutathione metabolism		0.0058	8	33	7.1	Cellular response to heat						0.027	10	71	4.1	Unfolded protein binding
0.009	12	75	4.2	Nuclear division											0.01	7	38	4.8	Glyoxylate and dicarboxylate metabolism		0.019	6	23	7.6	Rhythmic process						0.046	4	11	10.6	Protein folding chaperone
0.014	5	12	10.9	DNA replication initiation																	0.019	6	23	7.6	Circadian rhythm
0.016	15	124	3.2	Chromosome organization																	0.019	13	108	3.5	Response to temperature stimulus
0.016	19	185	2.7	Cell cycle																	0.05	25	341	2.1	Response to abiotic stimulus
0.022	14	118	3.1	Alpha-amino acid metabolic process
0.022	16	146	2.9	Cell cycle process
0.032	6	25	6.3	Mitotic sister chromatid segregation
0.032	9	58	4.1	Mitotic nuclear division
0.032	12	95	3.3	Organelle fission
0.034	4	10	10.5	Mitotic sister chromatid cohesion
0.037	16	161	2.6	DNA metabolic process
0.04	5	19	6.9	Reg. of DNA replication
0.04	6	28	5.6	Sister chromatid segregation
0.04	8	50	4.2	DNA conformation change
0.04	14	135	2.7	Cellular homeostasis
0.04	16	167	2.5	Homeostatic process
0.046	4	12	8.7	Sister chromatid cohesion
0.046	7	41	4.5	Cellular ion homeostasis
DEG-up 0-96 h																					DEG-down 0-96 h
biological process (BP)					cellular component (CC)					molecular function (MF)					KEGG pathway						biological process (BP)					cellular component (CC)					molecular function (MF)					KEGG pathway
Enrichment FDR	Number of genes	Pathway Genes	Fold Enrichment	Name	Enrichment FDR	Number of genes	Pathway Genes	Fold Enrichment	Name	Enrichment FDR	Number of genes	Pathway Genes	Fold Enrichment	Name	Enrichment FDR	Number of genes	Pathway Genes	Fold Enrichment	Name		Enrichment FDR	Number of genes	Pathway Genes	Fold Enrichment	Name	Enrichment FDR	Number of genes	Pathway Genes	Fold Enrichment	Name	Enrichment FDR	Number of genes	Pathway Genes	Fold Enrichment	Name	Enrichment FDR	Number of genes	Pathway Genes	Fold Enrichment	Name
0.027	15	118	3.5	Alpha-amino acid metabolic process	No significant enrichment found					0.0095	50	749	1.8	Oxidoreductase activity	6.9e-05	65	968	1.8	Metabolic pathways		No significant enrichment found					No significant enrichment found					No significant enrichment found					No significant enrichment found
															0.002	8	38	5.8	Glyoxylate and dicarboxylate metabolism
															0.015	36	556	1.8	Biosynthesis of secondary metabolites
															0.017	6	32	5.1	Glutathione metabolism
															0.025	12	122	2.7	Carbon metabolism
															0.045	5	29	4.7	Carbon fixation in photosynthetic organisms
DEG-up 0-192 h																					DEG-down 0-192 h
biological process (BP)					cellular component (CC)					molecular function (MF)					KEGG pathway						biological process (BP)					cellular component (CC)					molecular function (MF)					KEGG pathway
Enrichment FDR	Number of genes	Pathway Genes	Fold Enrichment	Name	Enrichment FDR	Number of genes	Pathway Genes	Fold Enrichment	Name	Enrichment FDR	Number of genes	Pathway Genes	Fold Enrichment	Name	Enrichment FDR	Number of genes	Pathway Genes	Fold Enrichment	Name		Enrichment FDR	Number of genes	Pathway Genes	Fold Enrichment	Name	Enrichment FDR	Number of genes	Pathway Genes	Fold Enrichment	Name	Enrichment FDR	Number of genes	Pathway Genes	Fold Enrichment	Name	Enrichment FDR	Number of genes	Pathway Genes	Fold Enrichment	Name
3.2e-11	29	146	5.6	Cell cycle process	0.0005	18	142	3.6	Chromosome	0.0029	55	838	1.8	DNA binding	0.0029	8	38	5.9	Glyoxylate and dicarboxylate metabolism		No significant enrichment found					No significant enrichment found					No significant enrichment found					No significant enrichment found
2.6e-10	31	185	4.7	Cell cycle	0.0022	8	35	6.4	Nuclear chromosome
3.6e-09	19	75	7.1	Nuclear division	0.031	3	6	14.1	Condensed nuclear chromosome
8.6e-09	17	62	7.7	Reg. of cell cycle process	0.031	4	13	8.7	Nuclear replication fork
2.9e-08	17	68	7	DNA replication	0.031	8	54	4.2	Protein-DNA complex
2.9e-08	20	97	5.8	Mitotic cell cycle process	0.042	5	25	5.6	Condensed chromosome
4.4e-08	15	53	8	DNA-dependent DNA replication	0.042	78	1588	1.4	Nucleus
5.5e-08	18	82	6.2	Reg. of cell cycle
8.8e-08	19	95	5.6	Organelle fission
4e-07	10	24	11.7	Neg. reg. of cell cycle process
8.2e-06	13	58	6.3	Mitotic nuclear division
9.1e-05	8	24	9.4	Cell cycle phase transition
0.00014	17	124	3.9	Chromosome organization
0.00018	6	13	13	Cell cycle checkpoint signaling
0.00018	6	13	13	Neg. reg. of cell cycle phase transition
0.00018	9	35	7.2	Reg. of nuclear division
0.00022	7	20	9.8	Meiotic nuclear division
0.00026	19	161	3.3	DNA metabolic process
P11 basal
DEG-up 0-24 h																					DEG-down 0-24h
biological process (BP)					cellular component (CC)					molecular function (MF)					KEGG pathway						biological process (BP)					cellular component (CC)					molecular function (MF)					KEGG pathway
Enrichment FDR	Number of genes	Pathway Genes	Fold Enrichment	Name	Enrichment FDR	Number of genes	Pathway Genes	Fold Enrichment	Name	Enrichment FDR	Number of genes	Pathway Genes	Fold Enrichment	Name	Enrichment FDR	Number of genes	Pathway Genes	Fold Enrichment	Name		Enrichment FDR	Number of genes	Pathway Genes	Fold Enrichment	Name	Enrichment FDR	Number of genes	Pathway Genes	Fold Enrichment	Name	Enrichment FDR	Number of genes	Pathway Genes	Fold Enrichment	Name	Enrichment FDR	Number of genes	Pathway Genes	Fold Enrichment	Name
0.00071	25	336	2.9	Peptide biosynthetic process	4.8e-06	17	133	5	Cytosolic ribosome	0.00019	20	214	3.7	Structural constituent of ribosome	0.00022	15	145	4.1	Ribosome		6.6e-12	27	92	6.2	Photosynthesis	1.2e-09	13	24	11.5	Photosystem I	2.3e-05	19	94	4.3	Electron transfer activity	1.3e-06	11	28	8.4	Photosynthesis
0.00071	26	363	2.8	Amide biosynthetic process	1.1e-05	17	149	4.5	Ribosomal subunit	0.0029	20	267	2.9	Structural molecule activity	0.012	4	15	10.5	Sulfur metabolism		0.0037	11	46	5.1	Photosynthesis, light reaction	4.7e-09	16	44	7.7	Photosystem	0.00061	13	62	4.5	Protein-disulfide reductase activity
0.00071	26	370	2.8	Peptide metabolic process	1.1e-05	21	225	3.7	Ribosome	0.0081	7	41	6.7	RRNA binding							0.011	14	83	3.6	Cell redox homeostasis	7.2e-09	26	126	4.4	Photosynthetic membrane	0.00061	13	62	4.5	Disulfide oxidoreductase activity
0.0008	24	335	2.8	Translation	7.7e-05	11	75	5.8	Cytosolic large ribosomal subunit												0.017	18	135	2.8	Cellular homeostasis	1.7e-08	28	152	3.9	Thylakoid	0.0024	14	82	3.6	Oxidoreductase activity, acting on a sulfur group of donors
0.0008	28	431	2.5	Cellular amide metabolic process	0.0003	11	88	4.9	Large ribosomal subunit												0.032	5	13	8.2	Chlorophyll biosynthetic process	1.5e-06	22	122	3.8	Thylakoid membrane	0.016	5	13	8.2	Chlorophyll binding
0.0043	13	133	3.8	Sulfur compound metabolic process	0.028	17	296	2.3	Ribonucleoprotein complex												0.032	5	13	8.2	Photosynthesis, light harvesting in photosystem I	1.5e-06	22	124	3.8	Chloroplast thylakoid
0.0094	35	695	2	Organonitrogen compound biosynthetic process	0.041	6	55	4.3	Cytosolic small ribosomal subunit												0.032	6	19	6.7	Photosynthesis, light harvesting	1.5e-06	22	124	3.8	Plastid thylakoid
0.021	13	160	3.2	Ribosome biogenesis																	0.032	6	20	6.4	Chlorophyll metabolic process	1.6e-06	20	106	4	Chloroplast thylakoid membrane
0.023	14	185	3	RNA modification																	0.039	19	167	2.4	Homeostatic process	1.6e-06	20	106	4	Plastid thylakoid membrane
0.027	5	25	7.8	Cellular oxidant detoxification																						1.3e-05	6	9	14.2	Photosystem I reaction center
0.028	5	26	7.5	Cellular response to toxic substance																						0.00095	8	31	5.5	Photosystem II
0.028	5	27	7.3	Detoxification																						0.0011	23	203	2.4	Plastid envelope
0.028	7	56	4.9	Ribosomal large subunit biogenesis																						0.0014	6	18	7.1	Plastoglobule
0.032	5	28	7	Response to toxic substance																						0.0035	45	562	1.7	Chloroplast
0.047	21	391	2.1	Carboxylic acid metabolic process																						0.0038	46	582	1.7	Plastid
0.047	25	500	2	Transmembrane transport
DEG-up 0-96 h																					DEG-down 0-96 h
biological process (BP)					cellular component (CC)					molecular function (MF)					KEGG pathway						biological process (BP)					cellular component (CC)					molecular function (MF)					KEGG pathway
Enrichment FDR	Number of genes	Pathway Genes	Fold Enrichment	Name	Enrichment FDR	Number of genes	Pathway Genes	Fold Enrichment	Name	Enrichment FDR	nGenes	Pathway Genes	Fold Enrichment	Name	Enrichment FDR	Number of genes	Pathway Genes	Fold Enrichment	Name		Enrichment FDR	Number of genes	Pathway Genes	Fold Enrichment	Name	Enrichment FDR	Number of genes	Pathway Genes	Fold Enrichment	Name	Enrichment FDR	Number of genes	Pathway Genes	Fold Enrichment	Name	Enrichment FDR	Number of genes	Pathway Genes	Fold Enrichment	Name
"No significant enrichment found!"					"No significant enrichment found!"					0.015	15	180	3.3	Heme binding	"No significant enrichment found!"						7.6e-06	18	92	5.2	Photosynthesis	5.7e-11	13	24	14.4	Photosystem I	0.0027	11	62	4.7	Protein-disulfide reductase activity	0.00028	8	28	7.6	Photosynthesis
										0.018	7	48	5.8	4 iron, 4 sulfur cluster binding							0.025	5	13	10.2	Photosynthesis, light harvesting in photosystem I	2.5e-08	14	44	8.4	Photosystem	0.0027	11	62	4.7	Disulfide oxidoreductase activity
										0.018	15	194	3.1	Tetrapyrrole binding							0.025	6	19	8.4	Photosynthesis, light harvesting	7.4e-06	6	9	17.7	Photosystem I reaction center	0.0051	13	94	3.7	Electron transfer activity
																										7.4e-06	19	126	4	Photosynthetic membrane	0.0059	5	13	10.2	Chlorophyll binding
																										2.7e-05	20	152	3.5	Thylakoid	0.015	11	82	3.6	Oxidoreductase activity, acting on a sulfur group of donors
																										0.00018	15	106	3.8	Chloroplast thylakoid membrane
																										0.00018	15	106	3.8	Plastid thylakoid membrane
																										0.00023	16	124	3.4	Chloroplast thylakoid
																										0.00023	16	124	3.4	Plastid thylakoid
																										0.00066	15	122	3.3	Thylakoid membrane
																										0.00066	16	137	3.1	Plastid membrane
																										0.0045	5	18	7.4	Plastoglobule
																										0.0089	6	31	5.1	Photosystem II
																										0.016	17	203	2.2	Plastid envelope
DEG-up 0-192 h																					DEG-down 0-192 h
biological process (BP)					cellular component (CC)					molecular function (MF)					KEGG pathway						biological process (BP)					cellular component (CC)					molecular function (MF)					KEGG pathway
Enrichment FDR	Number of genes	Pathway Genes	Fold Enrichment	Name	Enrichment FDR	Number of genes	Pathway Genes	Fold Enrichment	Name	Enrichment FDR	nGenes	Pathway Genes	Fold Enrichment	Name	Enrichment FDR	Number of genes	Pathway Genes	Fold Enrichment	Name		Enrichment FDR	Number of genes	Pathway Genes	Fold Enrichment	Name	Enrichment FDR	Number of genes	Pathway Genes	Fold Enrichment	Name	Enrichment FDR	Number of genes	Pathway Genes	Fold Enrichment	Name	Enrichment FDR	Number of genes	Pathway Genes	Fold Enrichment	Name
"No significant enrichment found!"					"No significant enrichment found!"					"No significant enrichment found!"					"No significant enrichment found!"						1.3e-05	17	92	5.4	Photosynthesis	1.8e-11	13	24	15.7	Photosystem I	0.015	5	13	11.2	Chlorophyll binding	1.2e-05	9	28	9.3	Photosynthesis
																					0.015	6	19	9.2	Photosynthesis, light harvesting	7.7e-09	14	44	9.2	Photosystem	0.027	9	62	4.2	Protein-disulfide reductase activity	0.038	9	84	3.1	Plant-pathogen interaction
																					0.016	5	13	11.2	Photosynthesis, light harvesting in photosystem I	4.5e-07	20	126	4.6	Photosynthetic membrane	0.027	9	62	4.2	Disulfide oxidoreductase activity
																					0.038	8	46	5	Photosynthesis, light reaction	1.8e-06	21	152	4	Thylakoid
																					0.042	5	17	8.5	Protein-chromophore linkage	3.2e-06	6	9	19.3	Photosystem I reaction center
																										1.2e-05	16	106	4.4	Chloroplast thylakoid membrane
																										1.2e-05	16	106	4.4	Plastid thylakoid membrane
																										1.6e-05	17	124	4	Chloroplast thylakoid
																										1.6e-05	17	124	4	Plastid thylakoid
																										5.5e-05	16	122	3.8	Thylakoid membrane
																										5.5e-05	17	137	3.6	Plastid membrane
																										0.0025	18	203	2.6	Plastid envelope
																										0.0057	6	31	5.6	Photosystem II
																										0.022	23	351	1.9	Organelle subcompartment
																										0.025	4	18	6.4	Plastoglobule
																										0.049	32	582	1.6	Plastid
																										0.05	31	562	1.6	Chloroplast
P15 basal
DEG-up 0-24 h																					DEG-down 0-24h
biological process (BP)					cellular component (CC)					molecular function (MF)					KEGG pathway						biological process (BP)					cellular component (CC)					molecular function (MF)					KEGG pathway
Enrichment FDR	Number of genes	Pathway Genes	Fold Enrichment	Name	Enrichment FDR	Number of genes	Pathway Genes	Fold Enrichment	Name	Enrichment FDR	Number of genes	Pathway Genes	Fold Enrichment	Name	Enrichment FDR	Number of genes	Pathway Genes	Fold Enrichment	Name		Enrichment FDR	Number of genes	Pathway Genes	Fold Enrichment	Name	Enrichment FDR	Number of genes	Pathway Genes	Fold Enrichment	Name	Enrichment FDR	Number of genes	Pathway Genes	Fold Enrichment	Name	Enrichment FDR	Number of genes	Pathway Genes	Fold Enrichment	Name
0.00015	45	431	2.3	Cellular amide metabolic process	0.0011	13	75	3.8	Cytosolic large ribosomal subunit	0.00059	11	41	5.9	RRNA binding	0.0022	6	15	8.8	Sulfur metabolism		6.6e-09	33	92	3.8	Photosynthesis	5e-08	15	24	6.6	Photosystem I	0.00078	66	386	1.8	DNA-binding transcription factor activity	0.017	6	11	5.7	Photosynthesis
0.00025	39	363	2.4	Amide biosynthetic process	0.0011	15	88	3.8	Large ribosomal subunit	0.0014	16	99	3.6	Monooxygenase activity	0.032	16	145	2.4	Ribosome		0.00014	190	1418	1.4	Reg. of cellular process	3.4e-07	35	126	2.9	Photosynthetic membrane	0.0059	66	418	1.7	Transcription regulator activity
0.00027	39	370	2.3	Peptide metabolic process	0.0011	18	133	3	Cytosolic ribosome	0.0014	25	214	2.6	Structural constituent of ribosome							0.00061	16	46	3.7	Photosynthesis, light reaction	2.2e-06	18	44	4.3	Photosystem	0.034	11	34	3.4	Enzyme inhibitor activity
0.00037	36	336	2.4	Peptide biosynthetic process	0.0011	20	149	3	Ribosomal subunit	0.0014	60	749	1.8	Oxidoreductase activity							0.00061	20	68	3.1	Reg. of protein kinase activity	2.9e-06	32	122	2.8	Thylakoid membrane	0.034	11	35	3.3	Molecular function inhibitor activity
0.00062	22	160	3	Ribosome biogenesis	0.0011	25	225	2.5	Ribosome	0.0032	18	135	2.9	Iron ion binding							0.00061	21	75	2.9	Reg. of transferase activity	2.9e-06	37	152	2.6	Thylakoid
0.00062	35	335	2.3	Translation	0.029	26	296	1.9	Ribonucleoprotein complex	0.0043	18	140	2.8	Oxidoreductase activity, acting on paired donors, with incorporation or reductio							0.00061	59	341	1.8	Response to abiotic stimulus	3.1e-06	29	106	2.9	Chloroplast thylakoid membrane
0.001	8	24	7.4	Ribosomal large subunit assembly	0.033	42	571	1.6	Cytosol	0.012	26	267	2.2	Structural molecule activity							0.00061	129	910	1.5	Reg. of cellular metabolic process	3.1e-06	29	106	2.9	Plastid thylakoid membrane
0.0011	19	133	3.2	Sulfur compound metabolic process						0.014	4	8	11	Large ribosomal subunit rRNA binding							0.00085	120	857	1.5	Reg. of nitrogen compound metabolic process	8.2e-06	31	124	2.6	Chloroplast thylakoid
0.002	10	43	5.1	Ribosome assembly						0.02	38	472	1.8	Transition metal ion binding							0.001	211	1692	1.3	Biological reg.	8.2e-06	31	124	2.6	Plastid thylakoid
0.0038	11	56	4.3	Ribosomal large subunit biogenesis						0.029	9	55	3.6	Oxidoreductase activity, acting on paired donors, with incorporation or reductio							0.0012	33	158	2.2	Reg. of molecular function	7.3e-05	31	137	2.4	Plastid membrane
0.0043	23	202	2.5	Ribonucleoprotein complex biogenesis						0.029	41	538	1.7	Transmembrane transporter activity							0.0014	31	146	2.2	Cell cycle process	0.0022	8	18	4.7	Plastoglobule
0.0062	6	17	7.8	Lipid homeostasis						0.039	8	48	3.7	4 iron, 4 sulfur cluster binding							0.0026	20	79	2.7	Reg. of protein phosphorylation	0.0029	36	203	1.9	Plastid envelope
0.0097	5	12	9.2	Brassinosteroid homeostasis						0.039	18	180	2.2	Heme binding							0.0026	31	152	2.1	Reg. of catalytic activity	0.011	5	9	5.8	Photosystem I reaction center
0.013	41	500	1.8	Transmembrane transport						0.039	35	448	1.7	RNA binding							0.0026	126	941	1.4	Reg. of macromolecule metabolic process	0.012	3	3	10.5	Chloroplast photosystem I
0.017	115	1870	1.4	Biosynthetic process						0.039	41	551	1.6	Transporter activity							0.0033	163	1288	1.3	Response to stimulus	0.012	3	3	10.5	Chloroplast thylakoid membrane protein complex
0.017	119	1946	1.4	Cellular nitrogen compound metabolic process																						0.023	9	31	3.1	Photosystem II
0.018	82	1244	1.5	Cellular nitrogen compound biosynthetic process
0.018	112	1820	1.4	Organic substance biosynthetic process
0.021	3	4	16.6	Sulfate assimilation
0.021	5	15	7.4	Brassinosteroid metabolic process
DEG-up 0-96 h																					DEG-down 0-96 h
biological process (BP)					cellular component (CC)					molecular function (MF)					KEGG pathway						biological process (BP)					cellular component (CC)					molecular function (MF)					KEGG pathway
Enrichment FDR	Number of genes	Pathway Genes	Fold Enrichment	Name	Enrichment FDR	Number of genes	Pathway Genes	Fold Enrichment	Name	Enrichment FDR	Number of genes	Pathway Genes	Fold Enrichment	Name	Enrichment FDR	Number of genes	Pathway Genes	Fold Enrichment	Name		Enrichment FDR	Number of genes	Pathway Genes	Fold Enrichment	Name	Enrichment FDR	Number of genes	Pathway Genes	Fold Enrichment	Name	Enrichment FDR	Number of genes	Pathway Genes	Fold Enrichment	Name	Enrichment FDR	Number of genes	Pathway Genes	Fold Enrichment	Name
0.018	8	29	5.8	Cell wall modification	0.0017	24	189	2.7	Extracellular region	0.0034	16	99	3.4	Monooxygenase activity	No significant enrichment found						6.3e-06	88	642	1.8	Reg. of transcription, DNA-templated	4.6e-07	13	24	7.2	Photosystem I	2.2e-07	65	386	2.2	DNA-binding transcription factor activity	0.0032	6	11	7.2	Photosynthesis
0.018	15	97	3.2	Cell differentiation	0.013	16	123	2.7	Cell wall	0.0034	35	336	2.2	Sequence-specific DNA binding							6.3e-06	88	642	1.8	Reg. of nucleic acid-templated transcription	3.2e-05	15	44	4.5	Photosystem	1.2e-06	66	418	2.1	Transcription regulator activity	0.0073	20	113	2.3	Plant hormone signal transduction
0.018	16	107	3.1	Cellular developmental process	0.013	16	124	2.7	External encapsulating structure	0.004	6	15	8.4	Aspartyl esterase activity							6.3e-06	88	642	1.8	Reg. of RNA biosynthetic process	0.001	24	126	2.5	Photosynthetic membrane	0.00089	98	838	1.6	DNA binding
0.02	8	31	5.4	Cell population proliferation	0.035	6	25	5	Cyclin-dependent protein kinase holoenzyme complex	0.004	66	838	1.6	DNA binding							6.9e-06	94	710	1.8	Reg. of cellular macromolecule biosynthetic process	0.001	27	152	2.4	Thylakoid	0.012	45	336	1.8	Sequence-specific DNA binding
0.04	7	28	5.2	Reg. of cyclin-dependent protein serine/threonine kinase activity	0.048	18	183	2.1	Cell-cell junction	0.014	58	749	1.6	Oxidoreductase activity							7.1e-06	24	92	3.5	Photosynthesis	0.0038	22	124	2.4	Chloroplast thylakoid	0.017	6	13	6.1	Chlorophyll binding
0.04	17	133	2.7	External encapsulating structure organization	0.048	18	183	2.1	Plasmodesma	0.015	5	14	7.5	Pectinesterase inhibitor activity							2.6e-05	90	697	1.7	Reg. of nucleobase-containing compound metabolic process	0.0038	22	124	2.4	Plastid thylakoid	0.047	10	41	3.2	Organic acid transmembrane transporter activity
0.042	16	126	2.7	Cell wall organization	0.048	18	183	2.1	Cell junction	0.015	7	29	5	Cyclin-dependent protein serine/threonine kinase regulator activity							5.7e-05	109	910	1.6	Reg. of cellular metabolic process	0.0051	5	9	7.4	Photosystem I reaction center
0.043	6	22	5.7	Reg. of cell population proliferation	0.048	18	183	2.1	Symplast	0.015	17	140	2.5	Oxidoreductase activity, acting on paired donors, with incorporation or reductio							7.4e-05	90	718	1.7	Transcription, DNA-templated	0.0051	7	18	5.2	Plastoglobule
0.043	6	22	5.7	Pectin catabolic process	0.048	18	183	2.1	Anchoring junction	0.015	21	189	2.3	Enzyme regulator activity							7.4e-05	90	719	1.7	Nucleic acid-templated transcription	0.0051	19	106	2.4	Chloroplast thylakoid membrane
										0.015	22	206	2.2	Molecular function regulator							7.4e-05	103	857	1.6	Reg. of nitrogen compound metabolic process	0.0051	19	106	2.4	Plastid thylakoid membrane
										0.02	6	23	5.5	Pectinesterase activity							7.4e-05	154	1418	1.4	Reg. of cellular process	0.0051	21	122	2.3	Thylakoid membrane
										0.02	8	41	4.1	Kinase regulator activity							0.00011	95	782	1.6	Reg. of gene expression	0.024	8	31	3.4	Photosystem II
										0.029	3	5	12.5	Plus-end-directed microtubule motor activity							0.00011	165	1555	1.4	Reg. of biological process	0.039	20	137	1.9	Plastid membrane
										0.029	7	34	4.3	Enzyme inhibitor activity							0.00016	109	941	1.5	Reg. of macromolecule metabolic process	0.039	148	1589	1.2	Nucleus
										0.031	7	35	4.2	Molecular function inhibitor activity
										0.04	7	37	4	Protein kinase regulator activity
										0.04	32	386	1.7	DNA-binding transcription factor activity
										0.044	15	135	2.3	Iron ion binding
										0.045	6	29	4.3	Oxidoreductase activity, acting on the aldehyde or oxo group of donors
										0.049	18	180	2.1	Heme binding
DEG-up 0-192 h																					DEG-down 0-192 h
biological process (BP)					cellular component (CC)					molecular function (MF)					KEGG pathway						biological process (BP)					cellular component (CC)					molecular function (MF)					KEGG pathway
Enrichment FDR	Number of genes	Pathway Genes	Fold Enrichment	Name	Enrichment FDR	Number of genes	Pathway Genes	Fold Enrichment	Name	Enrichment FDR	Number of genes	Pathway Genes	Fold Enrichment	Name	Enrichment FDR	Number of genes	Pathway Genes	Fold Enrichment	Name		Enrichment FDR	Number of genes	Pathway Genes	Fold Enrichment	Name	Enrichment FDR	Number of genes	Pathway Genes	Fold Enrichment	Name	Enrichment FDR	Number of genes	Pathway Genes	Fold Enrichment	Name	Enrichment FDR	Number of genes	Pathway Genes	Fold Enrichment	Name
0.027	8	29	6.1	Cell wall modification	0.0077	16	124	2.9	External encapsulating structure	0.0059	6	15	8.9	Aspartyl esterase activity	0.0068	6	21	6.3	Stilbenoid, diarylheptanoid and gingerol biosynthesis		4.3e-05	24	92	3.5	Photosynthesis	3.3e-07	13	24	7.3	Photosystem I	5.1e-06	61	386	2.1	DNA-binding transcription factor activity	0.0029	6	11	7.4	Photosynthesis
					0.0077	21	189	2.5	Extracellular region	0.0059	15	99	3.4	Monooxygenase activity	0.0068	7	27	5.8	Flavonoid biosynthesis		0.02	8	19	5.7	Photosynthesis, light harvesting	0.00014	14	44	4.3	Photosystem	4.9e-05	61	418	2	Transcription regulator activity	0.042	18	113	2.2	Plant hormone signal transduction
					0.015	15	123	2.7	Cell wall	0.006	32	336	2.1	Sequence-specific DNA binding	0.0082	11	74	3.3	Phenylpropanoid biosynthesis		0.039	6	13	6.2	Photosynthesis, light harvesting in photosystem I	0.00029	28	152	2.5	Thylakoid	0.014	6	13	6.2	Chlorophyll binding
										0.022	5	14	7.9	Pectinesterase inhibitor activity							0.039	6	15	5.4	Reg. of jasmonic acid mediated signaling pathway	0.00034	24	124	2.6	Chloroplast thylakoid	0.014	11	41	3.6	Organic acid transmembrane transporter activity
										0.029	3	5	13.3	Oxidoreductase activity, acting on NAD(P)H, oxygen as acceptor							0.039	9	33	3.7	Amino acid transmembrane transport	0.00034	24	124	2.6	Plastid thylakoid	0.014	44	336	1.8	Sequence-specific DNA binding
										0.029	6	23	5.8	Pectinesterase activity							0.039	10	37	3.6	Organic acid transmembrane transport	0.00038	24	126	2.6	Photosynthetic membrane
										0.029	7	34	4.6	Enzyme inhibitor activity							0.039	12	46	3.5	Photosynthesis, light reaction	0.00052	21	106	2.7	Chloroplast thylakoid membrane
										0.029	7	35	4.4	Molecular function inhibitor activity							0.039	34	255	1.8	Cellular response to chemical stimulus	0.00052	21	106	2.7	Plastid thylakoid membrane
										0.029	9	55	3.6	Oxidoreductase activity, acting on paired donors, with incorporation or reductio							0.039	44	341	1.7	Response to abiotic stimulus	0.001	24	137	2.4	Plastid membrane
										0.029	16	140	2.5	Oxidoreductase activity, acting on paired donors, with incorporation or reductio							0.039	56	476	1.6	Response to chemical	0.0031	5	9	7.5	Photosystem I reaction center
										0.041	31	386	1.8	DNA-binding transcription factor activity							0.039	71	642	1.5	Reg. of transcription, DNA-templated	0.0031	21	122	2.3	Thylakoid membrane
																					0.039	71	642	1.5	Reg. of nucleic acid-templated transcription	0.013	28	203	1.9	Plastid envelope
																					0.039	71	642	1.5	Reg. of RNA biosynthetic process	0.016	6	18	4.5	Plastoglobule
																					0.039	77	718	1.4	Transcription, DNA-templated
																					0.039	77	719	1.4	Nucleic acid-templated transcription
																					0.039	76	710	1.4	Reg. of cellular macromolecule biosynthetic process
																					0.039	77	721	1.4	RNA biosynthetic process
																					0.039	126	1288	1.3	Response to stimulus

## Sheet: Table S4
Table S4. Putative target genes of TFs from selected STEM expression profiles
P11 apical									P13 apical									P11 basal									P15 basal
GO	SolycID	ITAG Annotation	0 hae	24 hae	96 hae	192 hae	TF		GO	SolycID	ITAG Annotation	0 hae	24 hae	96 hae	192 hae	TF		GO	SolycID	ITAG Annotation	0 hae	24 hae	96 hae	192 hae	TF		GO	SolycID	ITAG Annotation	0 hae	24 hae	96 hae	192 hae	TF
auxin	Solyc02g037530	auxin response factor 8B	112.391	66.354	64.0035	57.169			cell cycle	Solyc01g006700	downstream neighbor of Son	18.0515	43.9785	34.072	40.632	GBF3		detoxification	Solyc01g006640	AMP-dependent synthetase/ligase	0.078	3.53733	0.882667	0.162			cell cycle	Solyc01g087500	DNA topoisomerase 2	53.236	26.362	144.784	82.9683	BBM and LBD16
auxin	Solyc03g118740	SlPIN1	26.073	4.12	0.712	1.2585	MYB94/96		cell cycle	Solyc01g086690	Sister chromatid cohesion 1 protein 4	1.0075	7.256	2.596	4.4555	ESE3		detoxification	Solyc03g096770	Protein RESPONSE TO LOW SULFUR 2	5.36733	55.7913	6.72933	5.29233	PUCHI		cell cycle	Solyc01g096840	QWRF motif protein	5.90533	1.833	15.0597	7.262	BBM
auxin	Solyc03g121970	protein BIG GRAIN 1-like A	45.4435	35.868	18.003	30.5075	MYB94/96, MYB60, MYB83 and BZIP44		cell cycle	Solyc01g087500	DNA topoisomerase 2	21.8125	11.2655	26.7605	67.091	ESE3		detoxification	Solyc03g096780	Protein RESPONSE TO LOW SULFUR 2	19.2093	200.771	32.6243	32.525			cell cycle	Solyc01g099270	Microtubule-binding protein TANGLED1	8.66767	2.24667	20.6757	9.984	BBM
auxin	Solyc04g076850	entire	839.049	176.518	148.669	212.012	ERF3 and SlERF-18		cell cycle	Solyc01g088390	Sister chromatid cohesion protein DCC1	7.267	15.9755	9.3745	12.1735			detoxification	Solyc06g072990	Protein RESPONSE TO LOW SULFUR 2	0.266	0.932333	0.185333	0.277333	PUCHI		cell cycle	Solyc01g107730	D-type cyclin-2	25.4573	7.01233	35.09	37.3173	BBM
auxin	Solyc05g046320	Small auxin up-regulated RNA55	2.7175	2.0235	1.1045	2.652			cell cycle	Solyc01g090800	cyclinU2_1	4.083	19.1825	14.045	4.4805			detoxification	Solyc09g009390	Monodehydroascorbate reductase	252.325	1030.07	467.766	463.301	PUCHI		cell cycle	Solyc02g072240	Cellulose synthase	99.487	20.033	86.8147	116.703	BBM
auxin	Solyc05g047460	Auxin Response Factor 7B	253.267	118.808	113.56	85.949			cell cycle	Solyc01g091850	Ccc1 family	0.258	1.699	1.671	1.4745	ABF3/4		oxidoreductase	Solyc00g028960	monothiol glutaredoxin-S1-like	2.46833	0.404667	0	0.048			cell cycle	Solyc02g079370	cyclinD6_3	2.18867	0.985	1.67433	1.64533	BBM and EIN6
auxin	Solyc06g008580	auxin-regulated IAA22	6.789	0.918	0.1705	0.0815	HY5		cell cycle	Solyc01g096190	Ca2+-ATPase	27.031	71.5375	47.557	43.3945			oxidoreductase	Solyc03g115870	Thioredoxin-like 1-2, chloroplastic	61.1703	17.897	43.1633	34.365			cell cycle	Solyc02g082820	cyclin B2	9.27733	3.903	25.008	12.9773	BBM
auxin	Solyc06g066020	auxin-regulated IAA36	2.5835	0.0705	0	0.176			cell cycle	Solyc01g098190		2.1655	7.241	18.103	21.595	HSF3		oxidoreductase	Solyc04g011780	Monothiol glutaredoxin-S1	0.300333	0.0126667	0	0.038			cell cycle	Solyc02g092950	Microtubule-associated protein RP/EB family member 1C	36.1837	16.013	49.2043	28.521	BBM
auxin	Solyc07g043620	Auxin Response Factor 6B	17.889	9.51	18.647	10.7055	MYB94/96		cell cycle	Solyc01g110130	DNA helicase	42.8685	98.18	64.536	91.008	DEL1		oxidoreductase	Solyc04g011790	Glutaredoxin	0.525667	0	0	0.0366667	GATA15/17		cell cycle	Solyc02g094740	TPX2	0.544333	0.177333	1.17733	0.651333	EIN6
auxin	Solyc07g056570	notabilis	14.229	2.797	1.871	8.32			cell cycle	Solyc01g111550	protein MCM10 homolog	2.8065	12.5235	3.471	6.438	DEL1		oxidoreductase	Solyc04g011800	Glutaredoxin	2.12467	0.006	0.0233333	0.0723333	GATA15/17		cell cycle	Solyc03g025710	Acyl-CoA N-acyltransferase	23.655	1.60767	1.802	1.494	GBF6 and ABI5
auxin	Solyc07g066560	Small auxin up-regulated RNA65	7.0345	23.347	2.723	2.0695	ERF3, MYB83, MYB94/96		cell cycle	Solyc02g066980	TPX2	0.2935	0.624	1.0355	1.6475			oxidoreductase	Solyc04g011810	Glutaredoxin	1.072	0.00666667	0.00566667	0.0793333	GATA15/17		cell cycle	Solyc03g071710	cyclin-dependent protein kinase inhibitor SMR1-like	62.86	19.773	18.9133	18.5803	BBM
auxin	Solyc08g021820	auxin-regulated IAA29	8.5025	0.5575	0.216	0.8765	MYB94/96		cell cycle	Solyc02g067100	TPX2	2.046	3.4915	4.6035	11.767			oxidoreductase	Solyc04g011820	Glutaredoxin	0.722667	0.0183333	0.017	0.111	GATA15/17		cell cycle	Solyc03g097100	Calmodulin	0.792667	0.163667	0.533333	0.385667	BBM and EIN6
auxin	Solyc09g083280	auxin-regulated IAA1	72.418	15.176	3.93	4.67	MYB94/96, MYB83 and MYB60		cell cycle	Solyc02g071530	Exonuclease 1	1.9605	8.1815	6.477	6.6615	DEL1		oxidoreductase	Solyc04g011850	Glutaredoxin	2.97667	0.0373333	0	0.055	GATA15/17		cell cycle	Solyc03g097400	Mitotic-spindle organizing protein 1	6.22733	2.253	3.92633	2.54167	BBM
auxin	Solyc10g080880	SlPIN7	8.729	2.261	0.8585	4.7415			cell cycle	Solyc02g077480	Histone H3	77.0795	144.95	56.9095	169.604	GBF3		oxidoreductase	Solyc04g011870	Glutaredoxin	0.369333	0.006	0	0.011	GATA15/17		cell cycle	Solyc03g098050	Calmodulin 6	257.938	138.615	167.746	161.83	BBM
auxin	Solyc11g013310	Auxin transporter-like protein 3	117.304	83.655	25.94	29.74	BZIP44		cell cycle	Solyc02g082180	DNA helicase	28.9465	64.5145	42.5385	63.7445	ESE3 and DEL1		oxidoreductase	Solyc05g053100	Dihydrolipoyl dehydrogenase-like protein	15.185	7.49333	18.1533	21.499			cell cycle	Solyc03g114040	Protein PRD1	2.884	1.46733	4.23633	3.20533	BBM
auxin	Solyc11g069190	auxin response factor 4	120.757	72.694	49.442	74.767	MYB94/96, MYB83 and MYB60		cell cycle	Solyc02g086450	Cyclin-dependent protein kinase inhibitor SMR6	0.943	2.9345	1.0825	3.3485	DEL1		oxidoreductase	Solyc06g008750	Glutaredoxin	0.122	0.0543333	0	0.00566667	GATA15/17		cell cycle	Solyc05g006050	cyclinD1_1	63.0507	25.9163	67.254	94.1877	GBF6
cell cycle	Solyc01g006700	downstream neighbor of Son	18.0515	43.9785	34.072	40.632	HY5 and BZIP44		cell cycle	Solyc02g087880	Tubulin alpha chain	45.87	27.0755	54.032	176.693			oxidoreductase	Solyc06g054570	monothiol glutaredoxin-S3-like	0.86	0.033	0.0583333	0.0546667			cell cycle	Solyc05g053050	Cyclin-dependent protein kinase inhibitor SMR4	0.301	0.1	0.551	0.578	CRF2
cell cycle	Solyc01g020440	Replication factor C subunit 3	15.4925	38.983	26.079	37.894	MYB83, MYB94/96 and MYB60		cell cycle	Solyc02g092950	Microtubule-associated protein RP/EB family member 1C	7.725	13.6175	13.975	20.97	HSF3		oxidoreductase	Solyc08g082590	Glutaredoxin	92.4917	39.6773	18.4333	15.6473	PUCHI		cell cycle	Solyc07g045010	Aspartyl/glutamyl-tRNA	34.6977	12.713	70.6043	38.7663	BBM
cell cycle	Solyc01g086690	Sister chromatid cohesion 1 protein 4	1.0075	7.256	2.596	4.4555	ERF3		cell cycle	Solyc03g007800	Timeless protein	5.686	12.5065	8.74	12.166	DEL1		oxidoreductase	Solyc09g009860	Glutaredoxin	5.65267	2.053	13.3057	7.84467	GATA15/17		cell cycle	Solyc07g051820	Cellulose synthase	67.4773	23.936	36.195	13.2283
cell cycle	Solyc01g087500	DNA topoisomerase 2	21.8125	11.2655	26.7605	67.091	ERF3 and SlERF-18		cell cycle	Solyc03g025710	Acyl-CoA N-acyltransferase	1.1045	15.6025	5.1145	2.518	GBF3		oxidoreductase	Solyc11g006430	Glutaredoxin	4.25133	1.24	10.879	5.20633	GATA15/17		cell cycle	Solyc08g066050	Protein kinase domain	18.1253	6.377	45.9783	23.1803	BBM, ABI5 and SPT
cell cycle	Solyc01g096840	QWRF motif protein	2.8575	2.0675	2.8545	7.025			cell cycle	Solyc03g032190	cyclinB2_7	6.88	5.177	8.693	23.244			oxidoreductase	Solyc12g013810	Thioredoxin	64.8473	26.5887	42.3387	46.7157	PUCHI		cell cycle	Solyc09g010980	cyclin-dependent kinase inhibitor	132.169	14.4873	7.04233	4.707	EIN6
cell cycle	Solyc01g111550	protein MCM10 homolog	2.8065	12.5235	3.471	6.438			cell cycle	Solyc03g097100	Calmodulin	0.1445	1.108	0.555	0.6925			photosynthesis	Solyc01g080840	Protein translocase subunit SecA	70.8173	34.0043	54.0163	63.2377	PUCHI		cell cycle	Solyc09g072800	Eisosome protein	37.56	8.29467	81.8837	42.7417	LBD16
cell cycle	Solyc02g038690	Histone H2B	6.301	14.7135	4.5555	13.868	SlERF-18, ERF3 and MYB67		cell cycle	Solyc03g114520	Centromere protein Mis12	4.5995	11.0815	7.327	9.8055	DEL1		photosynthesis	Solyc01g087040	Photosystem II PsbP	36.2177	14.528	28.9967	34.902	PUCHI		cell cycle	Solyc09g075550	Cellulose synthase	39.9517	12.807	115.302	57.719	BBM
cell cycle	Solyc02g082180	DNA helicase	28.9465	64.5145	42.5385	63.7445	ERF3 and SlERF-18		cell cycle	Solyc03g115050	Replication protein A subunit	14.9375	29.827	14.594	36.052	DEL1		photosynthesis	Solyc02g065400	33kDa precursor protein of oxygen-evolving complex	710.082	107.782	393.093	392.788			cell cycle	Solyc10g008210	Protein TPX2	14.498	4.72333	36.722	19.1343	BBM and EIN6
cell cycle	Solyc02g086450	Cyclin-dependent protein kinase inhibitor SMR6	0.943	2.9345	1.0825	3.3485			cell cycle	Solyc03g115710	Receptor-like protein kinase THESEUS 1	0.019	5.466	0.773	0.3915			photosynthesis	Solyc02g069450	Photosystem I reaction center subunit III, chloroplastic	140.333	19.2277	74.2043	45.2827			cell cycle	Solyc10g080950	cyclinB1_2	14.8353	7.404	56.003	28.4607	EIN6
cell cycle	Solyc03g007060	Cell cycle regulated microtubule associated protein	1.132	10.738	35.626	24.4075	HY5, SlERF-18 and BZIP44		cell cycle	Solyc04g011390	Histone H4	55.3845	130.333	47.0975	118.115	GBF3		photosynthesis	Solyc02g079950	photosystem II oxygen-evolving complex protein 3	354.868	91.754	264.181	273.341			cell cycle	Solyc11g066350	shugoshin-1-like	7.836	2.41333	14.423	9.29567	BBM
cell cycle	Solyc03g007800	Timeless protein	5.686	12.5065	8.74	12.166			cell cycle	Solyc04g072790	Cellulose synthase	0	0.159	0.563	0.9555			photosynthesis	Solyc02g080540	ATP synthase gamma chain, chloroplastic	206.177	76.0497	152.304	115.401			cell cycle	Solyc11g066690	RecQ-mediated instability-like protein	3.64133	1.46333	2.28933	1.69267	BBM and LBD16
cell cycle	Solyc03g025710	Acyl-CoA N-acyltransferase	1.1045	15.6025	5.1145	2.518	HY5 and BZIP44		cell cycle	Solyc04g078310	cyclin A3_1	2.546	7.3935	2.785	5.588	DEL1		photosynthesis	Solyc03g005760	Chlorophyll a-b binding protein, chloroplastic	1311.98	182.935	400.887	359.698	PUCHI		cell cycle	Solyc12g005480	Protein TPX2	9.718	2.736	21.654	12.3037	BBM and EIN6
cell cycle	Solyc03g032190	cyclinB2_7	6.88	5.177	8.693	23.244			cell cycle	Solyc04g078470	D-type cyclin-3	6.137	25.472	30.626	76.8815	GBF3		photosynthesis	Solyc04g082910	Calvin cycle protein CP12-3, chloroplastic	25.9057	11.4373	13.8737	20.61	GATA15/17		cell cycle	Solyc12g006270	Aspartyl/glutamyl-tRNA	33.721	6.433	37.693	17.079	ABI5
cell cycle	Solyc04g011390	Histone H4	55.3845	130.333	47.0975	118.115	HY5 and BZIP44		cell cycle	Solyc04g081350	Transcription factor E2FC	2.283	7.882	4.129	4.0935			photosynthesis	Solyc06g054260	photosystem 1 reaction center protein subunit 2	759.759	185.747	419.536	376.476			cell cycle	Solyc01g090800	cyclinU2_1	19.041	6.22267	4.57133	2.399	EIN6
cell cycle	Solyc04g078310	cyclin A3_1	2.546	7.3935	2.785	5.588	MYB94/96 and MYB67		cell cycle	Solyc05g006120	DNA polymerase lambda-like protein	0.9525	5.68	9.0805	16.4735	ESE3		photosynthesis	Solyc06g066640	Photosystem I reaction center subunit VI, chloroplastic	136.794	8.98667	47.7167	37.0257			cell cycle	Solyc01g098940	Pectinesterase	3.641	1.46533	3.947	3.72533	BBM and ABI5
cell cycle	Solyc04g078470	D-type cyclin-3	6.137	25.472	30.626	76.8815			cell cycle	Solyc05g007450	Origin of replication complex subunit 6	3.1155	15.982	4.2235	8.578	DEL1		photosynthesis	Solyc06g069730	Chlorophyll a-b binding protein, chloroplastic	69.0663	3.104	31.871	10.239	PUCHI		cell cycle	Solyc02g064980	MAP kinase kinase kinase	116.886	0.265	0.135	0.159333	BBM and EIN6
cell cycle	Solyc05g007450	Origin of replication complex subunit 6	3.1155	15.982	4.2235	8.578			cell cycle	Solyc05g053050	Cyclin-dependent protein kinase inhibitor SMR4	0.1785	0.3105	3.1315	3.112	GBF3		photosynthesis	Solyc06g082940	Photosystem I reaction center subunit XI protein	452.27	50.6433	199.599	180.518			cell cycle	Solyc02g065110	MAP kinase kinase kinase 15	14.3053	7.66367	8.238	12.8803	BBM
cell cycle	Solyc05g053050	Cyclin-dependent protein kinase inhibitor SMR4	0.1785	0.3105	3.1315	3.112	BZIP44		cell cycle	Solyc06g008510	Cdt1-like protein chloroplastic-like	6.396	17.839	6.82	13.941	ESE3, GBF3 and DEL1		photosynthesis	Solyc06g083680	Photosystem I reaction center subunit IV	209.886	22.0443	65.5387	68.9487			cell cycle	Solyc02g090970	MAP kinase kinase kinase 21	93.039	0.293	0.0293333	0.0813333	BBM and EIN6
cell cycle	Solyc05g054610	Histone H4	10.6295	34.089	10.6235	28.7855	HY5 and BZIP44		cell cycle	Solyc06g051300	Chromosome transmission fidelity-like protein	1.044	3.839	1.292	3.334	DEL1		photosynthesis	Solyc07g054210	light dependent NADH:protochlorophyllide oxidoreductase 2	116.99	61.7527	119.115	95.344			cell cycle	Solyc02g090980	MAP kinase kinase kinase 22	8.43033	0.383667	0.437667	0.201	EIN6 and ABI5
cell cycle	Solyc06g005390	Histone H2B	1.4345	5.9275	1.695	2.8555	ERF3 and SlERF-18		cell cycle	Solyc06g069230	DNA mismatch repair protein MutS	2.9675	11.6495	7.417	11.7795	DEL1		photosynthesis	Solyc08g006930	photosystem I reaction center subunit psaK, chloroplastic	384.46	50.1403	163.569	134.39			cell cycle	Solyc02g090990	MAP kinase kinase kinase 23	8.10033	1.39067	0.907	0.425	EIN6
cell cycle	Solyc06g005430	Histone H4	18.232	72.132	13.3145	21.7745			cell cycle	Solyc06g072240	Histone H4	3.0905	6.877	2.106	7.8365	DEL1		photosynthesis	Solyc08g013670	Photosystem I reaction center subunit N, chloroplastic	298.403	57.236	160.463	135.325			cell cycle	Solyc02g092980	cyclin D3.1	37.178	41.1533	86.993	49.6653	BBM
cell cycle	Solyc06g008510	Cdt1-like protein chloroplastic-like	6.396	17.839	6.82	13.941	MYB60, BZIP44, MYB67, HY5 and MYB83		cell cycle	Solyc06g076660	proliferating cell nuclear antigen	23.961	65.7405	38.797	81.129	DEL1		photosynthesis	Solyc08g074560	Protein kinase superfamily protein	38.697	15.816	19.4557	25.792			cell cycle	Solyc04g009820	GRF1-interacting factor 1	0.983	2.082	5.67067	2.77733	BBM and EIN6
cell cycle	Solyc06g076660	proliferating cell nuclear antigen	23.961	65.7405	38.797	81.129			cell cycle	Solyc07g018300	Replication protein A 32 kDa subunit A	9.955	23.0675	11.8435	22.4745	DEL1		photosynthesis	Solyc09g014520	Chlorophyll a-b binding protein, chloroplastic	794.682	140.151	384.911	308.599	PUCHI		cell cycle	Solyc06g066130	Mitogen-activated protein kinase kinase kinase 21	0.683333	0.091	0.882333	1.53467	BBM
cell cycle	Solyc07g045010	Aspartyl/glutamyl-tRNA	9.604	10.4575	14.7355	23.35	MYB94/96 and MYB67		cell cycle	Solyc07g045010	Aspartyl/glutamyl-tRNA	9.604	10.4575	14.7355	23.35			photosynthesis	Solyc09g063130	Photosystem I reaction center subunit IV	548.971	70.8057	190.241	198.339			cell cycle	Solyc07g051860	MAP kinase kinase kinase 50	1.22167	0.195667	0.440333	0.653333	BBM and EIN6
cell cycle	Solyc08g007330	DNA mismatch repair protein MutS	3.384	4.9405	10.768	10.5025			cell cycle	Solyc07g051820	Cellulose synthase	9.5885	37.0525	95.2555	99.129			photosynthesis	Solyc10g006230	Chlorophyll a-b binding protein, chloroplastic	1261.99	131.176	396.086	322.764			cell cycle	Solyc07g051880	MAP kinase kinase kinase 52	1.06733	0.544667	0.747	1.20367	CRF2, LBD16 and EIN6
cell cycle	Solyc08g066050	Protein kinase domain	6.6135	6.5335	8.0365	22.4735			cell cycle	Solyc07g051950	S-type anion channel SLAH1	0.091	18.1095	0.898	0.077			photosynthesis	Solyc10g008740	Mg-protoporphyrin IX chelatase	153.977	60.98	114.891	105.285			cell cycle	Solyc07g052610	cyclinU1_1	16.6823	3.129	4.79733	3.27533	BBM and ABI5
cell cycle	Solyc08g077990	Kinase like protein	4.373	13.6785	7.35	12.349			cell cycle	Solyc07g052610	cyclinU1_1	0.4005	10.2005	10.4965	8.687	GBF3 and ABF3/4		photosynthesis	Solyc10g077040	Magnesium-protoporphyrin IX monomethyl ester [oxidative] cyclase, chloroplastic	604.478	178.83	311.73	263.099	GATA15/17		cell cycle	Solyc09g091780	LES441249 p27KIP1-related-protein 1	14.927	28.4953	40.888	44.233	BBM
cell cycle	Solyc08g082200	DNA primase	5.6175	13.8825	7.0955	11.785	ERF3 and SlERF-18		cell cycle	Solyc07g053820	Mitotic checkpoint serine/threonine-protein kinase BUB1	2.808	5.1425	4.752	8.4735	DEL1		photosynthesis	Solyc12g005630	Cytochrome b6-f complex iron-sulfur subunit	304.899	113.795	204.545	216.991			cell cycle	Solyc11g005090	cyclin A1	15.324	10.001	52.7693	29.721	BBM and TCP4
cell cycle	Solyc09g082710	Histone H2A	31.4015	88.665	28.2865	60.2165			cell cycle	Solyc08g007330	DNA mismatch repair protein MutS	3.384	4.9405	10.768	10.5025	ESE3		photosynthesis	Solyc12g006140	Cab-5 gene encoding chlorophyll a/b-binding protein	239.754	6.44467	58.1307	40.8513			cell cycle	Solyc11g066880	Phytosulfokines 2	0.031	0	0.934667	0.393	TCP4
cell cycle	Solyc10g008910	Histone H3	71.802	207.17	56.758	164.667	HY5 and BZIP44		cell cycle	Solyc08g066050	Protein kinase domain	6.6135	6.5335	8.0365	22.4735	GBF3		photosynthesis	Solyc12g009600	Thylakoid lumenal 16.5 kDa protein, chloroplastic	50.7977	10.7193	25.9323	22.168	GATA15/17		cell cycle	Solyc12g088650	cyclinD3_2	16.637	26.1727	38.214	33.664	GBF6, ABI5 and TCP4
cell cycle	Solyc10g086450	cyclin-dependent protein kinase inhibitor SMR3	0	1.2745	9.3365	14.97			cell cycle	Solyc08g077990	Kinase like protein	4.373	13.6785	7.35	12.349	ESE3 and DEL1		photosynthesis	Solyc12g013710	light dependent NADH:protochlorophyllide oxidoreductase 1	61.745	3.89433	56.2893	50.793			cell cycle	Solyc12g099970	SNF1 kinase complex anchoring protein	68.1613	24.484	45.42	66.764	CRF2 and LBD16
cell cycle	Solyc11g005090	cyclin A1	12.311	5.6885	11.274	29.631	ERF3 and SlERF-18		cell cycle	Solyc08g079530	Deoxyribodipyrimidine photo-lyase	2.964	27.4415	12.6595	11.9415			photosynthesis	Solyc12g056830	ATP synthase subunit delta, chloroplastic-like	241.716	66.918	143.687	152.732	PUCHI		cell wall	Solyc01g079130	Pectin lyase-like superfamily protein	0.754333	11.534	8.51367	6.07933
cell cycle	Solyc11g066160	Histone H4	4.061	12.327	3.7465	13.668			cell cycle	Solyc08g082200	DNA primase	5.6175	13.8825	7.0955	11.785	ESE3 and DEL1		ribosome	Solyc01g008340	L19 ribosomal protein	16.6553	50.0787	28.636	23.9807	PUCHI		cell wall	Solyc02g014300	Pectinesterase	0.138	0.0126667	44.8407	21.1643	BBM
cell cycle	Solyc11g072840	Histone H4	14.532	35.2685	11.4475	27.813	HY5, ERF3 and BZIP44		cell cycle	Solyc09g074830	protein kinase WEE1	1.848	2.9795	3.654	5.205			ribosome	Solyc01g009470	Poly [ADP-ribose] polymerase	0.022	0.188667	0.538667	0.518			cell wall	Solyc02g080220	Pectinesterase	6.59733	8.289	50.2867	56.1213
cell cycle	Solyc11g072860	Histone H4	58.0525	127.617	41.1	102.183			cell cycle	Solyc09g075550	Cellulose synthase	14.9425	10.872	23.684	46.8885			ribosome	Solyc01g011000	Eukaryotic translation initiation factor 5A	200.482	470.821	253.709	230.244	PUCHI		cell wall	Solyc02g081990	Pectinesterase	0.0376667	0.016	5.15033	7.48133	BBM
cell cycle	Solyc11g073250	Histone H2A	98.9775	217.564	72.121	166.661			cell cycle	Solyc09g082480	protein RDM1	0	16.3385	3.3905	0.9715			ribosome	Solyc01g104590	ribosomal protein L3	688.541	1562.42	1217.58	1112.48			cell wall	Solyc03g083840	Pectinesterase	0.178667	0.487	2.737	1.69267	EIN6
cell cycle	Solyc12g005480	Protein TPX2	3.407	3.857	4.18	12.5645			cell cycle	Solyc10g008910	Histone H3	71.802	207.17	56.758	164.667	GBF3		ribosome	Solyc02g090420	50S ribosomal protein L25	20.442	57.5337	44.6083	40.2993			cell wall	Solyc04g008230	Pectin lyase-like superfamily protein	9.53233	8.92767	87.775	38.9077	ABI5, SPT and TCP4
cell cycle	Solyc12g013510	Histone H2B	3.321	9.868	5.3685	10.7265	ERF3, SlERF-18 and MYB67		cell cycle	Solyc10g080400	uv-b-insensitive 4	3.3065	12.4885	4.9495	10.4485	GBF3		ribosome	Solyc03g078290	40S ribosomal protein S18	90.316	218.688	148.312	129.062	PUCHI		cell wall	Solyc04g071070	Unknown protein	403.051	4984.79	7192.64	3865.45	BBM
glyxolate	Solyc01g080280	chloroplast glutamine synthetase	238.445	606.058	1214.83	944.15			cell cycle	Solyc11g005090	cyclin A1	12.311	5.6885	11.274	29.631	ESE3		ribosome	Solyc03g112360	60S ribosomal protein L27a	249.668	558.482	356.362	290.794			cell wall	Solyc04g079600	Homeodomain-like superfamily protein	0.551333	2.07033	3.65433	1.697	BBM
glyxolate	Solyc02g080810	Aminomethyltransferase	117.209	334.001	280.002	266.836	MYB94/96, MYB83 and MYB60		cell cycle	Solyc11g005800	Transducin/WD40 repeat-like superfamily protein	8.3845	19.246	10.3295	13.66	DEL1		ribosome	Solyc04g010240	60S ribosomal protein L35	141.478	424.336	285.803	231.528	PUCHI		cell wall	Solyc05g007790	Casparian strip membrane protein 1	0.884333	0.810667	2.474	3.02133	BBM
glyxolate	Solyc02g082760	ethylene-responsive catalase	112.683	262.19	392.286	347.494			cell cycle	Solyc11g066160	Histone H4	4.061	12.327	3.7465	13.668			ribosome	Solyc04g026100	40S ribosomal protein S16	138.731	343.84	252.057	209.569	PUCHI		cell wall	Solyc05g055320	Peroxidase	0.0436667	0.0256667	6.64467	4.35767	EIN6
glyxolate	Solyc02g091560	Serine hydroxymethyltransferase	134.804	537.15	1020.47	955.072	MYB94/96 and MYB83		cell cycle	Solyc11g072840	Histone H4	14.532	35.2685	11.4475	27.813	GBF3 and DEL1		ribosome	Solyc04g050370	60S ribosomal protein L12	0.159667	1.288	1.262	0.994	PUCHI		cell wall	Solyc06g035790	S-adenosyl-L-methionine-dependent methyltransferases superfamily protein	5.116	5.92467	27.1473	10.4593	BBM, CRF2 and EIN6
glyxolate	Solyc05g053300	dihydrolipoamide dehydrogenase precursor	97.649	241.134	229.601	194.176	ERF3 and SlERF-18		glyxolate	Solyc01g080280	chloroplast glutamine synthetase	238.445	606.058	1214.83	944.15			ribosome	Solyc04g056530	Ribosomal L18p/L5e family protein	2.34333	5.68767	3.996	4.09767	GATA15/17		cell wall	Solyc06g051800	expansin 1	21.1507	113.421	78.1733	54.8207	BBM and LBD16
glyxolate	Solyc07g017950	Ribulose bisphosphate carboxylase small chain	0.0875	2.2805	9.6755	11.759	MYB94/96		glyxolate	Solyc02g080810	Aminomethyltransferase	117.209	334.001	280.002	266.836	ESE3		ribosome	Solyc04g063290	40S ribosomal protein S2	240.781	633.468	410.644	348.25	PUCHI		cell wall	Solyc07g008240	Non-symbiotic hemoglobin like	73.0297	426.934	555.297	631.709	TCP4
glyxolate	Solyc12g099930	Serine--glyoxylate aminotransferase	26.5985	230.147	540.196	750.321	MYB94/96		glyxolate	Solyc02g091560	Serine hydroxymethyltransferase	134.804	537.15	1020.47	955.072	NTL4/11		ribosome	Solyc05g005690	40S ribosomal protein S16	64.963	165.832	108.516	98.5663	PUCHI		cell wall	Solyc07g047740	TOMTPX2A peroxidase	0.244667	0.064	5.81933	3.31733	BBM
oxidoreductase	Solyc01g111630	glycerate dehydrogenase	72.1475	395.647	433.813	454.122	BZIP44		glyxolate	Solyc08g007040	Glycine cleavage system H protein	36.9965	83.9685	130.858	141.579	ESE3 and NTL4/11		ribosome	Solyc05g007560	60S ribosomal protein L34	164.175	436.717	274.911	232.453	PUCHI		cell wall	Solyc08g005280	Cellulose synthase	0.194333	0.146	6.25833	3.22367	BBM
oxidoreductase	Solyc03g034220	Tomato RuBP carboxylase small subunit	1237.03	2508.54	4354.1	3185.11			oxidoreductase	Solyc01g094910	ferric-chelate reductase	0.596	16.1575	41.9335	44.8085			ribosome	Solyc05g012120	ribosome maturation factor RimP	4.85467	15.5257	9.98867	9.69267	GATA15/17		cell wall	Solyc10g005350	Xyloglucan endotransglucosylase/hydrolase	0.291333	0.469333	1.24367	1.00467	BBM
oxidoreductase	Solyc09g018790	Succinic semialdehyde reductase isofom1	41.291	100.21	103.181	108.046	HY5 and BZIP44		oxidoreductase	Solyc01g098850	NAD	0.0515	0.766	0.5475	0.271	ESE3		ribosome	Solyc05g051000	40S ribosomal protein S13	66.902	171.64	109.624	92.8927	PUCHI		cell wall	Solyc11g005770	Pectinesterase	24.6323	65.891	136.216	147.73	BBM
photosynthesis	Solyc01g105030	Chlorophyll a-b binding protein, chloroplastic	261.062	52.056	460.53	348.837	MYB94/96		oxidoreductase	Solyc01g102610	Ferric reduction oxidase 6	3.0405	16.392	5.552	6.0895	GBF3		ribosome	Solyc05g054580	60S acidic ribosomal protein P0	556.155	1415.69	843.923	655.944	PUCHI		cell wall	Solyc12g005790	Peroxidase	0	0	1.324	1.32967	BBM
photosynthesis	Solyc03g005760	Chlorophyll a-b binding protein, chloroplastic	762.782	5.4885	778.612	713.004			oxidoreductase	Solyc01g106400	Peptide-methionine	2.328	4.245	5.057	9.031			ribosome	Solyc07g005050	60S ribosomal protein L39	102.943	234.97	183.536	156.933	GATA15/17		cell wall	Solyc12g008530	Pectinesterase	2.95767	4.50333	15.802	20.1397	BBM
photosynthesis	Solyc05g056050	Chlorophyll a-b binding protein, chloroplastic	74.632	2.9845	118.517	98.495			oxidoreductase	Solyc01g108860	2-oxoglutarate	0.038	0.7445	3.632	5.8395			ribosome	Solyc07g008860	WD40 repeat	21.37	58.5217	36.2643	34.077	PUCHI and GATA15/17		cell wall	Solyc12g008840	beta-galactosidase 4	24.1593	26.7863	29.1827	115.015	BBM
photosynthesis	Solyc06g069730	Chlorophyll a-b binding protein, chloroplastic	17.536	7.2955	63.2425	26.2525	ERF3 and SlERF-18		oxidoreductase	Solyc01g111630	glycerate dehydrogenase	72.1475	395.647	433.813	454.122	GBF3		ribosome	Solyc07g045370	Las1-like family protein	5.89233	15.573	11.2557	11.3607			cell wall	Solyc12g019180	Pectin lyase-like superfamily protein	0.297667	0.951667	0.957	0.915333	BBM
photosynthesis	Solyc06g083680	Photosystem I reaction center subunit IV	109.986	37.5195	137.298	123.424	BZIP44		oxidoreductase	Solyc02g062430	D-2-hydroxyglutarate dehydrogenase, mitochondrial	9.1975	11.831	18.427	16.704			ribosome	Solyc09g065330	40S ribosomal protein S24	169.152	385.556	258.88	214.241	PUCHI		cell wall	Solyc12g094460	L-ascorbate oxidase-like protein	55.6853	292.217	177.825	78.32
photosynthesis	Solyc07g066150	Photosystem I reaction center subunit V, chloroplastic	336.262	168.823	616.041	523.553			oxidoreductase	Solyc02g063150	RuBP carboxylase small subunit	340.614	815.855	1243.2	988.514	GBF3		ribosome	Solyc09g075030	nucleolar protein 16-like	22.2437	61.254	46.4463	45.39	PUCHI		hormone transduction	Solyc02g084930	Cytochrome P450	0.00933333	0.69	0.328	1.198
photosynthesis	Solyc10g006230	Chlorophyll a-b binding protein, chloroplastic	507.762	276.561	925.569	707.588	MYB94/96,MYB60, MYB67 and BZIP44		oxidoreductase	Solyc02g068640	Pyrroline-5-carboxylate reductase	21.862	66.6475	48.124	51.016	GBF3		ribosome	Solyc09g083370	40S ribosomal protein S15	9.925	27.984	18.25	14.8557	PUCHI		hormone transduction	Solyc02g089160	dwarf	6.23633	23.4317	8.40067	8.196	TCP4
									oxidoreductase	Solyc02g078900	Alternative NAD	21.903	52.487	58.7615	41.9245			ribosome	Solyc09g090610	Ribosomal protein L17	47.9993	163.145	76.868	71.3313			hormone transduction	Solyc06g065420	Cytochrome P450	0.238	5.60767	3.08533	1.459	BBM
									oxidoreductase	Solyc02g079170	External alternative NAD	11.8105	107.682	79.1795	42.0645			ribosome	Solyc10g083600	ribosome production factor 2-like protein	38.8397	107.657	70.9463	56.6033			hormone transduction	Solyc12g006460	Cytochrome P450	96.1293	375.03	393.47	124.265	BBM
									oxidoreductase	Solyc02g081390	Lysine-specific histone demethylase 1	36.661	86.7935	111.611	59.314	HSF3		ribosome	Solyc11g018560	50S ribosomal protein L25	13.9893	33.8233	27.9023	22.2513	PUCHI		hormone transduction	Solyc12g006860	brassinosteroid hydroxylase	2.42933	6.219	8.15733	12.5667	CRF2 and BBM
									oxidoreductase	Solyc02g083480	Peroxidase	0.311	5.369	0.644	1.256			ribosome	Solyc11g039830	Glycine--tRNA ligase	68.0927	178.91	142.248	122.057	PUCHI		hormone transduction	Solyc01g103050	Auxin Response Factor 1	288.041	113.951	158.057	211.748	BBM
									oxidoreductase	Solyc02g084710	Thioredoxin	23.8925	58.7845	55.908	77.7715												hormone transduction	Solyc02g063010	BES1/BZR1-like protein	169.915	80.3127	78.3827	77.8447	BBM
									oxidoreductase	Solyc02g094160	Ribonucleoside-diphosphate reductase small chain	28.8225	121.155	78.539	91.605	DEL1											hormone transduction	Solyc02g069310	NIM1-like protein 1	98.6953	43.9463	38.1293	43.8563	SPT
									oxidoreductase	Solyc02g094180	Peroxidase	1.0545	16.911	15.821	19.0805	ESE3 and GBF3											hormone transduction	Solyc02g071220	type-A response regulator2	76.0303	14.2123	8.34767	10.9007	BBM
									oxidoreductase	Solyc03g025380	Peroxidase	28.1865	107.452	38.057	26.192												hormone transduction	Solyc03g093130	xyloglucan endotransglucosylase-hydrolase 3	618.524	10.701	11.0623	7.001	BBM
									oxidoreductase	Solyc03g025490	2-oxoglutarate	0.0095	0.215	0.0625	0.0385												hormone transduction	Solyc06g008580	auxin-regulated IAA22	3.54367	1.22133	1.39033	0.359667	BBM
									oxidoreductase	Solyc03g034220	Tomato RuBP carboxylase small subunit	1237.03	2508.54	4354.1	3185.11	ESE3 and ABF3/4											hormone transduction	Solyc06g008590	auxin-regulated IAA17	37.9277	5.909	7.22	2.94433	BBM
									oxidoreductase	Solyc03g115980	Geranylgeranyl diphosphate reductase, chloroplastic	171.891	484.406	488.954	290.613	GBF3											hormone transduction	Solyc06g053260	Auxin-responsive protein SAUR32	8.32133	11.035	1.904	6.61267	BBM
									oxidoreductase	Solyc04g009030	Glyceraldehyde-3-phosphate dehydrogenase	348.68	803.189	1531.84	1191.74												hormone transduction	Solyc06g053830	auxin-regulated IAA7	11.383	1.32	1.68933	1.84633	BBM and ABI5
									oxidoreductase	Solyc04g012060	Ribonucleoside-diphosphate reductase	29.6845	72.218	42.627	45.86	DEL1											hormone transduction	Solyc06g066020	auxin-regulated IAA36	0.777	0.275667	0.203667	0.386333	BBM
									oxidoreductase	Solyc04g050620	Cytochrome	10.3405	47.5185	153.919	156.09												hormone transduction	Solyc06g076400	Protein phosphatase 2C	25.552	15.4443	16.2533	12.7667	BBM
									oxidoreductase	Solyc04g050930	violaxanthin de-epoxidase	8.9345	45.634	43.1055	39.638												hormone transduction	Solyc07g042170	Jasmonate ZIM-domain protein 3	557.362	59.5067	75.9607	39.9297	LBD16 and SPT
									oxidoreductase	Solyc04g051350	Ribonucleoside-diphosphate reductase	16.666	50.5385	44.702	51.701	DEL1											hormone transduction	Solyc07g044980	NIM1-like protein 2	105.433	104.074	59.0563	115.625	GBF6 and ABI5
									oxidoreductase	Solyc04g071150	Cytochrome P450	5.083	38.9555	24.051	10.8445	ESE3											hormone transduction	Solyc08g079150	Auxin-responsive protein SAUR32	2.90767	0.48	0.809333	1.089	BBM and EIN6
									oxidoreductase	Solyc04g080850	Thioredoxin	160.661	205.051	336.118	317.056	GBF3											hormone transduction	Solyc09g083280	auxin-regulated IAA1	102.78	41.3237	49.888	38.1957	CRF2
									oxidoreductase	Solyc04g081740	prostaglandin E synthase 2-like	24.0595	70.712	30.099	32.8855	GBF3											hormone transduction	Solyc09g083290	auxin-regulated IAA14	209.09	38.9813	57.496	31.988	BBM,ABI5 and SPT
									oxidoreductase	Solyc06g019170	Delta-1-pyrroline-5-carboxylate synthase	41.397	51.4795	173.744	180.419	GBF3											hormone transduction	Solyc10g008520	Auxin-responsive GH3 family protein	62.6183	8.34367	8.40067	8.71633	LBD16
									oxidoreductase	Solyc06g036330	Ornithine cyclodeaminase	14.2395	32.625	26.1945	28.9505	ESE3											hormone transduction	Solyc10g076410	Abscisic acid receptor PYL6	21.3833	8.766	6.06967	9.79733	BBM
									oxidoreductase	Solyc06g050440	Peroxidase	0.656	26.8405	57.645	84.5935												hormone transduction	Solyc11g011030	Pto-responsive gene 1	17.3903	2.75533	11.047	5.86167	BBM
									oxidoreductase	Solyc06g050980	Ferritin	66.318	435.793	284.748	293.3	NTL4/11											hormone transduction	Solyc11g013310	Auxin transporter-like protein 3	34.2097	26.2063	18.554	18.3523	BBM and LBD16
									oxidoreductase	Solyc06g060260	Stromal ascorbate peroxidase	62.35	153.974	101.288	85.068	ESE3											hormone transduction	Solyc12g005310	Auxin-responsive GH3 family protein	2.93033	0.737	0.637667	0.566667	BBM
									oxidoreductase	Solyc06g067870	2-oxoglutarate	0.226	0.141	0.8465	1.3555												hormone transduction	Solyc12g017240	xyloglucan endo-transglycosylase B1	84.5533	2.17367	2.19533	2.34433	SPT
									oxidoreductase	Solyc06g074090	7-dehydrocholesterol reductase	5.788	103.529	398.864	217.763	NTL4/11											photosynthesis	Solyc01g080840	Protein translocase subunit SecA	70.8173	34.0043	54.0163	63.2377	BBM
									oxidoreductase	Solyc07g041500	Cytochrome P450	0.4135	52.6165	20.937	1.8545												photosynthesis	Solyc01g088310	Geranylgeranyl diphosphate reductase, chloroplastic	34.8393	30.6647	25.4093	18.489	SPT
									oxidoreductase	Solyc07g042460	Respiratory burst oxidase-like protein A	1.712	5.447	5.248	10.4365	ESE3											photosynthesis	Solyc02g063150	RuBP carboxylase small subunit	756.622	149.232	330.561	220.823	ABI5 and SPT
									oxidoreductase	Solyc07g053150	Frataxin, mitochondrial	5.1345	11.287	6.3515	7.9275	GBF3											photosynthesis	Solyc02g069450	Photosystem I reaction center subunit III, chloroplastic	140.333	19.2277	74.2043	45.2827	BBM
									oxidoreductase	Solyc07g055970	Cytochrome P450	0.1615	0.602	0.1425	0.2995												photosynthesis	Solyc02g082150	BnaCnng18720D protein	3.46933	2.00367	3.155	1.74667	BBM
									oxidoreductase	Solyc07g062060	Peptide methionine sulfoxide reductase MsrB	12.343	28.865	24.8705	23.003	GBF3 and ABF3/4											photosynthesis	Solyc03g005760	Chlorophyll a-b binding protein, chloroplastic	1311.98	182.935	400.887	359.698	LBD16
									oxidoreductase	Solyc08g062970	Glutaredoxin	0.166	2.201	2.6665	4.654	ESE3											photosynthesis	Solyc03g034220	Tomato RuBP carboxylase small subunit	2027.77	478.519	1161.83	1120.58	BBM and ABI5
									oxidoreductase	Solyc08g079570	Methylsterol monooxygenase 1-2	37.723	105.333	115.466	99.011												photosynthesis	Solyc03g120640	Photosystem I reaction center subunit VI, chloroplastic	523.482	84.8927	201.475	178.56	ABI5
									oxidoreductase	Solyc08g082590	Glutaredoxin	8.664	132.774	35.6925	30.702	ESE3 and GBF3											photosynthesis	Solyc04g082910	Calvin cycle protein CP12-3, chloroplastic	25.9057	11.4373	13.8737	20.61	BBM and TCP4
									oxidoreductase	Solyc09g011240	NAD	16.3725	66.619	59.2445	44.6025	ESE3 and GBF3											photosynthesis	Solyc06g066640	Photosystem I reaction center subunit VI, chloroplastic	136.794	8.98667	47.7167	37.0257	BBM
									oxidoreductase	Solyc09g018790	Succinic semialdehyde reductase isofom1	41.291	100.21	103.181	108.046	GBF3											photosynthesis	Solyc06g069730	Chlorophyll a-b binding protein, chloroplastic	69.0663	3.104	31.871	10.239	CRF2
									oxidoreductase	Solyc09g065900	Glutathione reductase	50.5895	125.892	107.883	79.993	HSF3											photosynthesis	Solyc06g083680	Photosystem I reaction center subunit IV	209.886	22.0443	65.5387	68.9487	ABI5
									oxidoreductase	Solyc09g082630	1,2-dihydroxy-3-keto-5-methylthiopentene dioxygenase	18.0945	52.8595	60.329	71.813	GBF3											photosynthesis	Solyc07g047850	Chlorophyll a-b binding protein, chloroplastic	1507.49	115.177	427.843	400.434	ABI5 and SPT
									oxidoreductase	Solyc09g092670	Cytochrome	2.05	20.173	14.697	15.1825	ESE3											photosynthesis	Solyc07g054210	light dependent NADH:protochlorophyllide oxidoreductase 2	116.99	61.7527	119.115	95.344	GBF6
									oxidoreductase	Solyc10g006970	Thioredoxin	5.71	19.4275	17.6765	24.3425												photosynthesis	Solyc07g054290	Photosystem II Psb27 protein	72.7437	16.1463	36.693	29.348	ABI5 and SPT
									oxidoreductase	Solyc10g008150	Glutaredoxin	0.0095	1.513	1.329	1.028	GBF3											photosynthesis	Solyc07g061990	Solanesyl diphosphate synthase	44.0893	20.5153	17.965	19.4653	BBM
									oxidoreductase	Solyc10g075160	Ferredoxin	28.4445	86.502	209.134	138.786	GBF3											photosynthesis	Solyc07g063600	Chlorophyll a-b binding protein, chloroplastic	248.557	30.5637	124.481	82.7467
									oxidoreductase	Solyc11g006020	NADH dehydrogenase-like complex O	13.894	55.449	23.943	29.7105												photosynthesis	Solyc07g066150	Photosystem I reaction center subunit V, chloroplastic	358.951	110.986	274.228	251.551	BBM and EIN6
									oxidoreductase	Solyc11g006290	3-oxo-5-alpha-steroid 4-dehydrogenase	0.2885	14.1865	0.3095	0.958												photosynthesis	Solyc07g066310	Photosystem II 10 kDa polypeptide, chloroplastic	1422.65	253.714	424.284	548.866	BBM, ABI5 and SPT
									oxidoreductase	Solyc11g006300	3-oxo-5-alpha-steroid 4-dehydrogenase	0	21.8585	1.579	1.201	ESE3											photosynthesis	Solyc08g006930	photosystem I reaction center subunit psaK, chloroplastic	384.46	50.1403	163.569	134.39	GBF6
									oxidoreductase	Solyc11g007990	chloroplast malate dehydrogenase	99.7755	205.582	289.295	251.755	DEL1											photosynthesis	Solyc08g013670	Photosystem I reaction center subunit N, chloroplastic	298.403	57.236	160.463	135.325	TCP4
									oxidoreductase	Solyc11g012130	Early nodulin-like protein 2-like	1.048	5.1795	28.4845	24.422	ESE3 and DEL1											photosynthesis	Solyc08g075990	protein LOW PSII ACCUMULATION 3, chloroplastic	11.601	3.353	6.18533	5.75	BBM and ABI5
									oxidoreductase	Solyc11g012850	Chlorophyllide a oxygenase, chloroplastic	45.2725	105.505	69.403	67.069	GBF3											photosynthesis	Solyc09g011810	Fructose-1,6-bisphosphatase	75.0573	23.1933	46.157	45.8463	TCP4
									oxidoreductase	Solyc11g062440	L-ascorbate oxidase	63.24	222.444	152.954	95.7575	ESE3											photosynthesis	Solyc09g014520	Chlorophyll a-b binding protein, chloroplastic	794.682	140.151	384.911	308.599	CRF2 and TCP4
									oxidoreductase	Solyc11g069940	Glutaredoxin	1.6925	2.8665	9.186	29.3765	ESE3											photosynthesis	Solyc10g005050	Protein CURVATURE THYLAKOID 1B, chloroplastic	120.954	32.7967	88.3193	84.9467	BBM
									oxidoreductase	Solyc11g071960	Sulfhydryl oxidase	4.09	8.993	4.785	6.526												photosynthesis	Solyc10g005180	Ycf3-interacting protein 1, chloroplastic	78.1573	29.9553	39.077	53.8613	BBM
									oxidoreductase	Solyc11g071990	FAD/NAD	1.2965	2.3785	3.764	2.602	ESE3											photosynthesis	Solyc10g077040	Magnesium-protoporphyrin IX monomethyl ester [oxidative] cyclase, chloroplastic	604.478	178.83	311.73	263.099	ABI5 and SPT
									oxidoreductase	Solyc12g044260	2-hydroxyacid dehydrogenase	4.6495	12.7925	8.05	9.9625	NTL4/11											photosynthesis	Solyc12g006140	Cab-5 gene encoding chlorophyll a/b-binding protein	239.754	6.44467	58.1307	40.8513	LBD16
									oxidoreductase	Solyc12g096780	Alcohol dehydrogenase superfamily	0.152	0.0095	6.991	6.077	ESE3											photosynthesis	Solyc12g009600	Thylakoid lumenal 16.5 kDa protein, chloroplastic	50.7977	10.7193	25.9323	22.168	BBM
									oxidoreductase	Solyc12g099290	Aldehyde dehydrogenase	26.9105	28.779	61.5255	46.696	HSF3											photosynthesis	Solyc12g011280	Chlorophyll a-b binding protein, chloroplastic	78.3943	4.267	40.7653	20.2567	EIN6
																											photosynthesis	Solyc12g017250	photosystem II 10 kDa polypeptide, chloroplastic	1.48633	0.273667	0.162	2.49833	BBM
																											photosynthesis	Solyc12g044280	Photosystem I reaction center subunit VI, chloroplastic	162.116	11.2633	35.8023	30.5477	ABI5 and SPT
																											photosynthesis	Solyc12g056830	ATP synthase subunit delta, chloroplastic-like	241.716	66.918	143.687	152.732	CRF2
																											ribosome	Solyc01g008340	L19 ribosomal protein	16.6553	50.0787	28.636	23.9807	CRF2
																											ribosome	Solyc01g104590	ribosomal protein L3	688.541	1562.42	1217.58	1112.48	GBF6 and ABI5
																											ribosome	Solyc01g111420	Ribosomal protein L1	26.105	94.552	48.263	43.3353	BBM
																											ribosome	Solyc02g069770	Transducin/WD40 repeat-like superfamily protein	14.3037	46.8153	28.621	21.4383	BBM
																											ribosome	Solyc02g069840	50S ribosomal protein L20	15.4807	34.07	25.1393	20.793	EIN6
																											ribosome	Solyc02g085230	U3 small nucleolar RNA-associated protein 22	13.0963	51.5853	35.3817	25.631	BBM
																											ribosome	Solyc03g045110	Ribosomal protein S5	0.990333	2.85467	1.769	1.87267	BBM
																											ribosome	Solyc03g078290	40S ribosomal protein S18	90.316	218.688	148.312	129.062	CRF2 and BBM
																											ribosome	Solyc03g093480	ARM repeat superfamily protein	53.0177	117.993	90.9453	108.047	BBM
																											ribosome	Solyc03g112360	60S ribosomal protein L27a	249.668	558.482	356.362	290.794	BBM and GBF6
																											ribosome	Solyc03g112850	60S ribosomal protein L44	176.588	439.834	343.689	331.932
																											ribosome	Solyc03g113860	Ribosomal RNA small subunit methyltransferase G-like protein	1.02733	2.629	2.06933	1.441	BBM
																											ribosome	Solyc04g005590	Ribosomal L32p protein family	15.939	35.4737	30.5417	30.7847	LBD16
																											ribosome	Solyc04g016380	ribosome biogenesis protein BRX1-like protein	44.4213	146.054	73.6563	63.412	EIN6
																											ribosome	Solyc04g026100	40S ribosomal protein S16	138.731	343.84	252.057	209.569	CRF2
																											ribosome	Solyc04g050370	60S ribosomal protein L12	0.159667	1.288	1.262	0.994	BBM and CRF2
																											ribosome	Solyc04g051670	RNA cytidine acetyltransferase	29.653	92.8817	56.3503	55.6933	BBM
																											ribosome	Solyc04g063290	40S ribosomal protein S2	240.781	633.468	410.644	348.25	BBM
																											ribosome	Solyc05g007560	60S ribosomal protein L34	164.175	436.717	274.911	232.453	CRF2
																											ribosome	Solyc05g051000	40S ribosomal protein S13	66.902	171.64	109.624	92.8927	BBM and CRF2
																											ribosome	Solyc05g054580	60S acidic ribosomal protein P0	556.155	1415.69	843.923	655.944	CRF2
																											ribosome	Solyc06g073310	60S ribosomal protein L9	305.595	794.274	557.722	482.29	BBM
																											ribosome	Solyc06g075180	60S ribosomal protein L12	131.349	340.917	294.397	246.891	BBM
																											ribosome	Solyc07g008860	WD40 repeat	21.37	58.5217	36.2643	34.077	CRF2
																											ribosome	Solyc07g045370	Las1-like family protein	5.89233	15.573	11.2557	11.3607	BBM and GBF6
																											ribosome	Solyc08g006840	30S ribosomal protein S15	20.1283	48.7633	42.5167	35.0473	BBM
																											ribosome	Solyc09g011420	Ribosomal protein L7Ae/L30e/S12e/Gadd45 family protein	62.947	146.587	94.9917	85.605	BBM
																											ribosome	Solyc09g065330	40S ribosomal protein S24	169.152	385.556	258.88	214.241	CRF2 and BBM
																											ribosome	Solyc09g074090	Exosome complex component RRP4	6.42167	20.5177	15.197	12.956	TCP4
																											ribosome	Solyc09g083370	40S ribosomal protein S15	9.925	27.984	18.25	14.8557	CRF2
																											ribosome	Solyc10g038060	Ribosomal L28 family	0.695333	1.73067	1.57633	1.371	BBM
																											ribosome	Solyc10g083600	ribosome production factor 2-like protein	38.8397	107.657	70.9463	56.6033	GBF6
																											ribosome	Solyc10g086010	60S ribosomal protein L4	162.928	431.319	295.932	234.776	EIN6
																											ribosome	Solyc11g018560	50S ribosomal protein L25	13.9893	33.8233	27.9023	22.2513	CRF2
																											ribosome	Solyc11g065670	60S ribosomal protein L12	98.1763	292.629	194.914	162.897	LBD16
																											ribosome	Solyc11g069440	60S ribosomal protein L12	77.2153	231.473	202.724	170.747	CRF2
																											ribosome	Solyc12g008720	60S ribosomal protein L31	251.574	568.397	395.752	342.412	BBM

## Sheet: Table S5
Table S5. Annotation and classification of expresed genes associated with core cell cycle regulation
						apical					basal				fold change						FDR
Gene id	ITAG4 annotation	Gene Name	Core cell cycle elements	Arabidopsis thaliana gene stable ID	Arabidopsis thaliana gene name	0 hae	24 hae	96 hae	192 hae		0 hae	24 hae	96 hae	192 hae	0-24 apical	0-96 apical	0-192 apical	0-24 basal	0-96 basal	0-192 basal	0-24 apical	0-96 apical	0-192 apical	0-24 basal	0-96 basal	0-192 basal
Solyc01g067490	Anaphase-promoting complex subunit 7	APC7	APC/C	AT2G39090	APC7	16.4395	27.964	29.056	25.5375		24.8443	31.7703	32.9307	29.001
Solyc02g062680	Anaphase-promoting complex subunit 10	APC10	APC/C	AT2G18290	APC10	25.033	29.56	15.6735	22.332		25.367	17.6623	19.87	20.5013
Solyc02g079050	Anaphase-promoting complex subunit 4	APC4	APC/C	AT4G21530	APC4	6.1685	8.4785	8.1215	10.356		9.19567	10.2857	13.9163	12.773
Solyc03g079920	cyclinU4_2	NEDD1	APC/C	AT5G05970	NEDD1	18.1605	19.262	21.268	19.6735		18.3627	21.434	26.6883	24.8067
Solyc03g096870	Mitotic-spindle organizing protein 1	CDC20-2A	APC/C	AT4G33260 / AT4G33270	CDC20.2 / / CDC20.1	8.5395	10.313	15.0425	38.1085		24.7837	12.4373	75.963	41.9357	0.141082	0.850751	2.11487	-1.124	1.42157	0.482088	0.781469	0.0476951	1.90307e-07	0.000657091	1.52645e-05	0.174908
Solyc03g113740	Anaphase-promoting complex subunit 8	APC8	APC/C	AT3G48150	APC8	12.6315	14.0315	11.1585	12.063		13.9653	11.8053	15.05	14.7183
Solyc06g043150	WD40 repeat	FZR3	APC/C			5.7815	5.6335	7.528	19.68		15.8773	4.33867	37.8317	19.894	-0.172826	0.411709	1.72199	-1.99994	1.06008	0.050089	0.755505	0.42057	0.000160846	2.16494e-08	0.00421806	0.911813
Solyc08g005420	cell division cycle 20.2, cofactor of APC complex-like	CDC20-2B	APC/C			6.259	3.853	4.737	6.161		2.88067	3.11033	5.027	5.73567
Solyc08g080080	WD40 repeat	FZRLA	APC/C	AT4G11920 / AT4G22910	CCS52A2 / FZR2	17.146	21.5625	17.9195	15.105		13.3873	18.7137	14.7453	10.996
Solyc12g014320	Anaphase-promoting complex subunit 6	APC6	APC/C	AT1G78770	APC6	4.231	9.7305	9.8885	9.606		8.96967	15.2313	15.0193	12.5613	1.07189	1.25993	1.12991	0.633558	0.549471	0.208174	4.50899e-06	4.93964e-08	1.437e-06	0.000564397	0.00339024	0.304927
Solyc12g056490	WD40 repeat	FZR2	APC/C	AT4G11920	FZR1	3.449	4.542	1.9845	3.7865		2.26133	3.504	3.42533	3.283
Solyc08g066330	LEY17225 cyclin-dependent protein kinase A-1	CDKA-1	CDK A			70.008	31.456	47.041	47.0595		43.519	45.2233	45.1273	45.171	-1.28874	-0.543244	-0.621807	-0.0743075	-0.141404	-0.222546	1.93761e-17	0.000572147	8.05883e-05	0.597685	0.309094	0.0973977
Solyc11g070140	Protein kinase p34cdc2	CDC2A-2	CDK A			9.6735	7.056	8.3045	9.0315		7.25667	8.938	8.36867	7.80933
Solyc12g095860	LEY17226 cyclin-dependent protein kinase 2A-2	CDK2A-2	CDK A	AT3G48750	CDC2AAT	69.064	53.056	51.23	62.7975		42.5863	41.553	48.0887	60.4193
Solyc04g082840	B2-type cyclin dependent kinase	CDKB2;2	CDK B	AT1G20930 / AT1G76540	CDKB2;2 / CDKB2;1	13.942	13.0355	22.046	59.293		39.6813	16.0397	107.392	58.7303	-0.228459	0.695485	2.0503	-1.43502	1.24342	0.28972	0.663311	0.141486	3.01531e-06	4.69766e-05	0.000524003	0.470808
Solyc10g074720	B1-type cyclin dependent kinase	CDKB2;2L	CDK B	AT2G38620 / AT3G54180	CDKB1;2 / CDKB1;1	10.4905	10.745	14.142	25.7995		26.3137	14.025	58.5687	32.7173	-0.095215	0.466717	1.25714	-1.03467	0.961845	0.0393401	0.861153	0.326289	0.00437942	0.00285666	0.00645459	0.927313
Solyc10g074730	Late embryogenesis abundant protein, LEA-14	LEA14	CDK B			0.572	2.284	0.929	1.409		2.31067	3.97967	1.97	1.433	1.92485	0.790256	1.29561	0.65295	-0.427791	-0.968241	8.42625e-05	0.136771	0.0114512	0.088282	0.293048	0.0117281
Solyc01g098160	Cyclin-dependent kinase C-2	CDKC-2A	CDK C	AT1G54610		56.4985	109.621	72.4675	61.082		84.7343	112.855	82.509	84.4163
Solyc01g103350	Cyclin-dependent kinase C-2	CDKC-2B	CDK C	AT1G09600 / AT1G57700		8.1155	13.034	18.8715	16.741		14.372	18.8543	20.1253	18.7777	0.536537	1.23663	0.976154	0.261344	0.291393	0.108759	0.0248882	4.27537e-08	2.32205e-05	0.175273	0.135806	0.607338
Solyc04g056280	cyclin dependent kinase C	CDKC;1	CDK C	AT5G10270 / AT5G64960	CDKC;1 / CDKC2	49.7955	53.68	35.758	36.719		40.5227	48.7643	42.5093	43.004
Solyc06g064660	Cyclin-dependent kinase C-1	CDKC;1LA	CDK C	AT1G33770		0.4795	2.5035	2.31	2.7165		2.006	2.375	2.563	2.779	2.20347	2.25195	2.40151	0.113553	0.160079	0.194835	2.69575e-12	7.51742e-13	2.30242e-14	0.647491	0.525382	0.430924
Solyc11g045610	Cyclin-dependent kinase C-1	CDKC;1LB	CDK C	AT1G33770 / AT4G10010		1.519	3.595	3.885	6.866		2.202	4.804	9.447	10.4197	1.06708	1.34468	2.08225	0.996115	1.90696	1.96709	0.012416	0.00132731	3.669e-07	0.00245424	2.79468e-09	8.60009e-10
Solyc04g071310	cyclin-dependent kinase-activating kinase assembly factor-related / CDK-activating kinase assembly factor-like protein		CDK D, E, F, G	AT4G30820		23.3505	26.451	21.862	27.7975		24.0673	29.591	25.315	25.5663
Solyc05g014760	Cyclin-dependent kinase G-2	CDKG2	CDK D, E, F, G	AT1G67580	CDKG2	219.922	116.484	148.583	146.478		354.82	117.738	125.719	182.176	-1.05015	-0.534981	-0.642621	-1.72282	-1.69186	-1.24036	2.11022e-11	0.000980868	7.07138e-05	1.10263e-43	4.16142e-42	4.93301e-23
Solyc08g081280	Cyclin-dependent kinase D-1	CDKD-1/	CDK D, E, F, G	AT1G18040 / AT1G73690	CDKD1;3 / CDKD1;1	14.9955	23.553	16.5855	17.769		16.714	33.82	25.801	19.702
Solyc12g007200	Cyclin-dependent kinase F-1	CDKF-1	CDK D, E, F, G	AT4G28980	CDKF;1	89.7825	47.4315	42.773	49.8195		49.1657	42.606	51.8713	63.0607	-1.05477	-1.03951	-0.90498	-0.33719	-0.117173	0.0820616	1.44784e-12	2.75485e-12	1.83298e-09	0.00705627	0.395966	0.562596
Solyc12g027850	Cyclin-dependent kinase E-1	CDKE-1	CDK D, E, F, G			21.2575	25.019	20.971	23.0835		14.5717	26.6293	20.9297	27.7213
Solyc03g120440	cyclin A2_1	CYCA2-1	Cyclin A	AT1G15570 / AT1G80370	CYCA2;3 / CYCA2;4	1.8555	1.3305	1.181	2.6735		2.54567	1.38467	3.71433	1.94367
Solyc04g078310	cyclin A3_1	CYCA3-2	Cyclin A	AT1G47210 / AT1G47230 / AT5G43080	CYCA3;2 / CYCA3;4 / CYCA3;1	2.546	7.3935	2.785	5.588		5.48767	4.91967	10.7557	5.174	1.41176	0.166818	1.10002	-0.286472	0.777482	-0.359728	0.000261344	0.721633	0.00571826	0.386769	0.0133271	0.28437
Solyc06g065680	cyclin A2	CYCA2-2	Cyclin A	AT5G11300 / AT5G25380	CYC3B / CYCA2;1	19.23	14.1725	24.9865	28.19		20.295	9.61167	42.7903	27.8967	-0.572541	0.409674	0.49871	-1.20805	0.882976	0.183042	0.0793722	0.222478	0.136597	8.62784e-07	0.000423642	0.518045
Solyc10g049360	cyclin A3_6	CYCA3-6	Cyclin A			27.878	30.202	24.984	22.3605		26.159	28.0827	24.262	24.587
Solyc11g005090	cyclin A1	CYCA1	Cyclin A	AT1G44110	CYCA1;1	12.311	5.6885	11.274	29.631		15.324	10.001	52.7693	29.721	-1.24608	-0.0930181	1.21966	-0.743849	1.59084	0.679221	0.00119833	0.845794	0.0015847	0.0165661	1.24801e-07	0.0325524
Solyc12g088470	cyclin A3_4	CYCA3-4	Cyclin A			0.773	4.041	1.518	2.934		0.78	2.837	3.72267	2.127	2.22543	0.977666	1.85099	1.73406	2.06127	1.17146	5.11465e-13	0.00293729	3.70622e-09	4.74385e-13	4.67714e-18	1.97533e-06
Solyc12g088500	cyclin A3_5	CYCA3-5	Cyclin A			0.7755	2.9665	0.6465	1.38		0.664	2.02067	2.71367	1.61867	1.80183	-0.231325	0.778734	1.47697	1.83795	1.01112	4.87968e-08	0.57282	0.0310971	1.36449e-08	9.68804e-13	0.00016249
Solyc12g088520	cyclin A3_3	CYCA3-3	Cyclin A			0.9975	3.2805	0.942	1.9275		0.949333	3.625	3.91033	2.13233	1.59939	-0.0412046	0.916059	1.80293	1.84721	0.891429	1.16705e-11	0.901527	0.00026005	4.03189e-24	2.4701e-25	1.69937e-06
Solyc12g088530	cyclin A3.1	CYCA3-1	Cyclin A	AT1G47210 / AT1G47230 / AT5G43080	CYCA3;2 / CYCA3;4 / CYCA3;1	10.6675	32.4075	10.782	16.2935		13.954	21.4913	29.6597	19.8437	1.46693	0.0438572	0.558609	0.492898	0.893372	0.231201	1.2029e-15	0.856416	0.00439755	0.00114293	1.75158e-09	0.155086
Solyc01g009040	cyclinB1_4	CYCB1-4	Cyclin B	AT5G06150	CYCB1;2	7.282	6.1225	9.3675	25.274		18.0433	6.35033	42.9877	25.444	-0.391923	0.388652	1.74277	-1.63606	1.05902	0.219181	0.416827	0.419706	4.65248e-05	1.32119e-06	0.00234896	0.577532
Solyc02g082820	cyclin B2	CYCB2L	Cyclin B	AT2G17620 / AT4G35620	CYCB2;1 / CYCB2;2	4.364	4.402	4.8615	9.907		9.27733	3.903	25.008	12.9773	-0.11592	0.195018	1.13792	-1.3789	1.23711	0.208046	0.840635	0.724976	0.0172703	0.000169707	0.00084616	0.625317
Solyc03g032190	Cyclin-dependent kinase inhibitor 1	CYCB2-7	Cyclin B			6.88	5.177	8.693	23.244		17.613	6.46133	48.3893	26.4347	-0.546627	0.365902	1.70275	-1.5741	1.26529	0.310644	0.25143	0.457313	9.36552e-05	4.84175e-06	0.000300932	0.427184
Solyc04g082430	cyclinB2_4	CYCB2-4	Cyclin B	AT1G20610 / AT1G76310	CYCB2;3 / CYCB2;4	9.657	6.4795	9.8785	24.4395		21.912	5.96133	47.07	26.7017	-0.708474	0.0672314	1.29831	-2.00609	0.910074	0.0095833	0.174283	0.914943	0.00929715	1.46991e-07	0.0235638	0.984603
Solyc06g073610	cyclin B1	CYCB1-4	Cyclin B			6.0375	9.1925	13.3405	19.523		6.39967	5.72467	16.095	12.5787	0.482805	1.18566	1.65922	-0.289872	1.13656	0.699453	0.050062	2.79806e-07	3.29926e-13	0.143567	5.78971e-10	0.000205245
Solyc07g066660	cyclinB3_1	CYCB3-1	Cyclin B	AT1G16330	CYCB3;1	23.253	21.8605	32.61	34.432		33.1183	22.7513	52.851	47.6127
Solyc10g078330	B-type cyclin	CYCB1	Cyclin B	AT4G37490	CYC1	5.11	5.1725	7.1875	27.1345		12.3073	8.22167	47.6807	24.9277	-0.112608	0.528698	2.36738	-0.711109	1.76076	0.743444	0.825589	0.234531	3.07755e-09	0.033342	4.14311e-08	0.0282405
Solyc10g080950	cyclinB1_2	CYCB1-3	Cyclin B	AT5G06150	CYCB1;2	4.771	4.522	9.2735	27.228		14.8353	7.404	56.003	28.4607	-0.221882	0.980628	2.4525	-1.13049	1.72368	0.664485	0.687212	0.0402978	5.73841e-08	0.00219932	2.22899e-06	0.0871276
Solyc12g094600	cyclinB2_5	CYCB2-5	Cyclin B			0.085	0.2825	0.5425	0.6415		0.404	0.0443333	0.665667	0.454667	1.33848	2.44156	2.59754	-3.3109	0.527256	-0.107309	0.118478	0.0023666	0.0012974	8.72569e-07	0.396719	0.876535
Solyc01g107730	D-type cyclin-2	CYCD3-1	Cyclin D	AT3G50070 / AT4G34160 / AT5G67260	CYCD3;1 / CYCD3;2 / CYCD3;3	10.1595	6.0295	6.117	15.386		25.4573	7.01233	35.09	37.3173	-0.878496	-0.6931	0.550382	-1.98883	0.268146	0.278352	0.0181946	0.0672941	0.160259	1.42061e-12	0.403939	0.385645
Solyc02g079370	cyclinD6_3	CYCD6-3	Cyclin D			2.11	1.8155	2.099	2.041		2.18867	0.985	1.67433	1.64533	-0.346732	0.0283586	-0.096417	-1.28129	-0.580935	-0.688317	0.287732	0.942954	0.798067	5.86568e-08	0.0162501	0.00391698
Solyc02g092980	cyclin D3.1	CYCD3-2	Cyclin D	AT3G50070 / AT5G67260	CYCD3;3 / CYCD3;2	18.2115	30.82	35.643	34.2605		37.178	41.1533	86.993	49.6653	0.625886	1.00127	0.853389	0.0174088	1.03314	0.141079	0.0119848	3.23091e-05	0.000511289	0.940383	6.93326e-08	0.523789
Solyc03g006670	cyclinD6_2	CYCD6-2	Cyclin D			4.066	2.209	1.9755	3.0035		1.73533	2.67333	5.443	5.841	-0.998709	-0.993433	-0.482645	0.49363	1.45474	1.47876	0.0254983	0.0263764	0.320371	0.179559	2.69835e-05	2.00019e-05
Solyc04g076040	cyclinD5_1	CYCD5-1	Cyclin D	AT2G22490	CYCD2;1	44.168	65.896	46.793	39.712		33.144	37.71	37.6847	44.0237
Solyc04g078470	D-type cyclin-3	CYCD3	Cyclin D			6.137	25.472	30.626	76.8815		21.3563	17.4227	45.082	24.4703	1.93082	2.35896	3.60192	-0.422258	0.882931	-0.0775342	1.38981e-05	7.56369e-08	7.44914e-17	0.269681	0.0171712	0.860964
Solyc05g006050	cyclinD1_1	CYCD1-1	Cyclin D	AT1G70210	CYCD1;1	58.489	59.1415	82.6195	84.9915		63.0507	25.9163	67.254	94.1877	-0.116699	0.529588	0.476451	-1.41382	-0.102075	0.301068	0.608951	0.00784265	0.0191587	1.39842e-20	0.572141	0.0687452
Solyc05g051410	cyclinD4_2	CYCD4-2	Cyclin D	AT2G22490 / AT5G65420	CYCD2;1 / CYCD4;1	13.5915	19.12	10.6735	10.283		13.2027	11.898	14.032	13.996
Solyc07g054950	cyclinD6_1	CYCD6-1	Cyclin D	AT4G03270	CYCD6;1	0.8815	0.7	0.5595	0.4685		0.561	0.380333	1.28867	1.55667
Solyc11g010460	cyclinD4_1	CYCD4-1	Cyclin D	AT5G10440	CYCD4;2	7.5925	6.0535	4.2085	4.2795		16.5987	3.724	18.8483	13.8443	-0.45244	-0.811171	-0.876711	-2.28514	-0.0113946	-0.535851	0.202012	0.016293	0.00999211	2.31712e-19	0.971468	0.0495413
Solyc12g088650	cyclinD3_2	CYCD3-2	Cyclin D			17.927	17.518	16.3715	21.4715		16.637	26.1727	38.214	33.664	-0.161125	-0.0919308	0.217681	0.524556	1.00508	0.741875	0.515638	0.724134	0.376662	0.00256812	3.43951e-09	1.78425e-05
Solyc02g081520	Nijmegen breakage syndrome 1	NBS1	DNA repair	AT3G02680	NBS1	17.241	14.899	16.654	15.6275		16.183	14.9393	15.3463	18.5393
Solyc03g025890	cyclinB2_7	MSH3	DNA repair	AT4G25540	MSH3	11.479	10.2565	21.566	21.145		12.2763	13.8903	22.1537	28.349
Solyc03g117530	Checkpoint protein	HUS1L	DNA repair	AT1G52530		12.7495	9.6335	7.2765	10.481		6.81233	6.80267	9.81433	10.8583
Solyc05g016230	Protein BREAST CANCER SUSCEPTIBILITY 1-like protein	BRCA1	DNA repair			32.935	23.7825	25.3155	27.1185		21.5737	19.035	19.8883	29.0163
Solyc05g025590	Replication protein A subunit	RPA70A	DNA repair			9.083	9.438	11.3905	12.869		7.35667	6.924	8.12067	10.1703
Solyc05g053800	DNA repair protein RAD50	RAD50	DNA repair	AT2G31970	ATRAD50	40.25	32.915	37.2675	36.5955		29.1993	43.07	43.294	50.3903
Solyc06g008210	Protein BREAST CANCER SUSCEPTIBILITY 1-like protein	BARD1	DNA repair	AT1G04020	ROW1	6.718	14.6625	6.695	12.4135		9.01767	17.6667	22.5673	11.5893	0.988926	0.0239309	0.832167	0.839717	1.12862	0.0846983	1.49244e-06	0.931733	6.99313e-05	1.96354e-07	1.94711e-12	0.66028
Solyc06g008970	RNA helicase DEAH-box18	DDX18	DNA repair	AT1G03190	UVH6	16.2835	17.235	12.8895	15.2155		15.1377	16.935	17.0457	16.9807
Solyc06g069230	DNA mismatch repair protein MutS	MSH2	DNA repair	AT3G18524	MSH2	2.9675	11.6495	7.417	11.7795		9.71067	15.337	15.739	11.7237	1.82941	1.34301	1.92513	0.528907	0.501977	-0.00723355	3.77338e-16	3.92077e-09	1.0765e-17	0.00316017	0.00591235	0.974159
Solyc07g017540	LEU22441 LeRAD51	RAD51	DNA repair	AT5G20850	RAD51	4.7585	12.6035	15.831	16.961		7.84767	11.5337	19.948	12.8503	1.26954	1.76378	1.78958	0.427249	1.15265	0.436305	3.29884e-07	4.63913e-13	2.67672e-13	0.0367603	3.8329e-09	0.0360939
Solyc07g018300	Replication protein A 32 kDa subunit A	RPA32	DNA repair	AT2G24490	RPA32A	9.955	23.0675	11.8435	22.4745		14.6147	31.1823	28.8297	19.0707	1.09511	0.298225	1.14597	0.963521	0.785328	0.108539	0.000154836	0.35529	7.96863e-05	2.58849e-05	0.000792828	0.68996
Solyc07g055170	DNA repair protein XRCC3-like protein	XRCC3	DNA repair	AT5G57450	XRCC3	1.2035	1.5195	0.974	1.768		0.658	1.33933	1.163	0.962667
Solyc08g007330	DNA mismatch repair protein MutS	MSH4	DNA repair	AT4G17380	ATMSH4	3.384	4.9405	10.768	10.5025		2.65333	3.00033	4.883	4.161	0.42583	1.71199	1.58953	0.0475246	0.684211	0.370634	0.354397	2.7292e-05	0.00012069	0.904551	0.0481275	0.310441
Solyc08g075840	Replication protein A subunit	RPA1C	DNA repair	AT4G19130 / AT5G45400	RPA1E / RPA70C	38.84	27.1845	57.406	58.681		37.1133	38.8227	55.5663	68.679
Solyc08g076610	Cell cycle checkpoint protein RAD1	RAD1	DNA repair	AT4G17760		4.269	6.657	4.892	5.2405		4.65633	4.56767	10.5127	8.477
Solyc09g009900	Unknown protein	RPA3B	DNA repair			6.2865	12.0005	5.2235	9.2215		8.374	11.8287	12.1087	10.2883
Solyc10g044780	Cell cycle checkpoint control protein family	ATRAD9	DNA repair	AT3G05480	RAD9	31.016	15.956	21.699	24.7345		16.1763	14.978	20.3173	20.9847	-1.09395	-0.485735	-0.376462	-0.240799	0.134793	0.0995542	3.08228e-11	0.00462534	0.0337679	0.0902344	0.373346	0.52113
Solyc10g081210	Replication protein A 14 kDa subunit A	RPA	DNA repair	AT4G18590	RPA3B	2.24	5.281	2.546	4.262		3.72933	4.181	6.483	4.58033	1.1349	0.246853	0.910579	0.0354354	0.602496	0.0198001	5.02452e-05	0.442367	0.00154447	0.891588	0.00694021	0.942314
Solyc01g006140	CDT1-like protein a, chloroplastic	CDT1L	DNA replication	AT2G31270	CDT1A	1.1925	4.5565	1.638	2.3		2.27433	2.81933	2.37067	2.05133	1.75968	0.448965	0.855363	0.178054	-0.13581	-0.426903	1.69136e-13	0.0954953	0.000840061	0.371982	0.521283	0.0275874
Solyc01g087500	DNA topoisomerase 2	TOP2	DNA replication	AT3G23890	TOPII	21.8125	11.2655	26.7605	67.091		53.236	26.362	144.784	82.9683	-1.08604	0.328759	1.5728	-1.14328	1.25037	0.36306	0.0130326	0.497052	0.00024122	0.000829987	0.000278475	0.337906
Solyc01g094760	Origin of replication complex subunit 5	ORC5	DNA replication	AT4G29910	ORC5	5.637	11.028	9.005	10.728		8.936	10.765	14.4443	13.412
Solyc02g082180	DNA helicase	MCM6	DNA replication	AT5G44635	MCM6	28.9465	64.5145	42.5385	63.7445		39.9867	86.5137	79.1203	61.265	1.02909	0.5934	1.09926	0.98222	0.788818	0.337502	5.19651e-14	2.40617e-05	8.77489e-16	1.73537e-19	7.59735e-13	0.00339317
Solyc02g093300	DNA polymerase	POLA	DNA replication	AT5G67100	ICU2	15.818	29.3845	19.6995	29.0515		29.5157	25.731	38.04	29.2933
Solyc03g006420	Origin recognition complex subunit 1	ORC1A	DNA replication	AT4G12620 / AT4G14700	ORC1B / ATORC1A	22.907	24.404	34.348	41.4705		23.8037	30.2107	47.3283	38.9283
Solyc03g019960	DNA mismatch repair protein MutS	CDT1	DNA replication			5.068	6.153	5.3045	9.5535		8.93967	8.387	17.8257	12.1367
Solyc04g014250	GLABRA2 expression modulator	GEMA	DNA replication	AT2G22475	GEM	60.2625	66.4455	61.5455	67.076		40.084	81.0917	75.709	64.4387
Solyc05g007450	Origin of replication complex subunit 6	ORC6	DNA replication	AT1G26840	ORC6	3.1155	15.982	4.2235	8.578		6.50167	11.8397	15.5557	8.42667	2.24491	0.490468	1.43808	0.735256	1.06444	0.0988912	9.70885e-20	0.0735657	1.50939e-08	0.000231053	7.28291e-08	0.674244
Solyc05g014540	DNA polymerase alpha subunit B	POLA2	DNA replication	AT1G67630	POLA2	8.978	16.5855	9.9825	14.6965		13.4547	17.205	19.9873	14.9527
Solyc06g008510	Cdt1-like protein chloroplastic-like	CDT1A	DNA replication	AT2G31270	CDT1A	6.396	17.839	6.82	13.941		6.04	12.2333	19.2033	14.343	1.33597	0.112093	1.06258	0.886812	1.47337	0.970746	1.90914e-26	0.462575	8.75036e-17	8.96176e-19	5.86707e-51	2.00606e-22
Solyc06g073510	Origin recognition complex subunit 2	ORC2	DNA replication	AT2G37560	ATORC2	14.35	19.9005	16.2475	18.9145		16.6397	22.7977	20.9383	23.927
Solyc06g076660	proliferating cell nuclear antigen	PCNA	DNA replication	AT1G07370 / AT2G29570	PCNA1 / ATPCNA2	23.961	65.7405	38.797	81.129		38.3793	93.2817	88.7747	53.9307	1.33079	0.734716	1.7229	1.15112	1.01507	0.215334	1.32111e-16	9.05351e-06	3.63268e-27	3.52436e-19	4.84894e-15	0.130842
Solyc06g076860	Cell division control protein	CDCL	DNA replication	AT1G07270 / AT2G29680	CDC6b / ATCDC6	3.179	14.0385	6.4065	10.656		7.91133	14.88	14.757	8.41367	2.01295	1.04637	1.68702	0.780685	0.704552	-0.18841	4.77562e-13	0.000292694	2.21724e-09	0.000506497	0.00204926	0.45916
Solyc08g082200	DNA primase	POLA3	DNA replication	AT5G41880	POLA3	5.6175	13.8825	7.0955	11.785		12.9277	13.34	15.758	11.1267	1.17977	0.377203	1.03016	-0.0844456	0.0912774	-0.492679	1.4375e-08	0.0961167	1.06715e-06	0.650775	0.63752	0.00381769
Solyc09g008630	DNA replication complex GINS protein PSF1	PSF1	DNA replication	AT1G80190	PSF1	4.7065	8.875	4.166	7.7175		4.453	8.04133	8.81067	6.72767
Solyc11g010440	GLABRA2 expression modulator	GEMB	DNA replication			6.8795	14.702	14.7685	14.311		12.687	5.376	5.321	5.31467	0.973864	1.14435	1.02159	-1.36888	-1.44754	-1.53219	0.000781473	6.42181e-05	0.000452413	1.33796e-09	1.68829e-10	1.24497e-11
Solyc11g067140	DNA polymerase epsilon catalytic subunit	POL2A/POL2B	DNA replication	AT1G08260	ESD7	18.266	14.5475	22.012	24.483		14.6873	16.3383	26.3467	28.8213
Solyc11g068480	DNA polymerase epsilon subunit 3	NF-YB11	DNA replication	AT2G27470	NF-YB11	11.4565	17.5195	11.04	15.3165		8.37567	14.3017	15.0937	14.4497
Solyc12g013880	Origin recognition complex subunit 3	ORC3	DNA replication	AT5G16690	ORC3	13.518	16.321	18.0555	19.852		13.067	21.9643	18.304	18.5143
Solyc01g007760	Transcription factor E2FA	E2F3	E2F/DP/RB	AT2G36010	E2F3	24.3335	26.4895	23.614	26.387		22.0473	24.7807	31.2587	27.6137
Solyc01g008260	E2F-associated phosphoprotein	EAPP	E2F/DP/RB	AT5G08320		16.49	13.4515	10.014	11.322		11.062	9.39033	9.22033	11.2343
Solyc02g087310	E2F transcription factor-like E2FE	E2FF/D	E2F/DP/RB			6.5185	14.52	10.174	12.24		13.3303	15.6723	12.5123	11.6537	1.03757	0.68904	0.873383	0.103163	-0.286216	-0.47147	1.37694e-09	8.57182e-05	5.3283e-07	0.490663	0.0450674	0.000656736
Solyc03g113760	E2F transcription factor-like E2FE	E2FE	E2F/DP/RB	AT3G48160	DEL1	3.0705	4.535	4.2375	7.907		7.29	6.00433	17.2337	9.59333	0.433088	0.500882	1.3224	-0.409492	1.0475	0.121014	0.290273	0.214471	0.000417955	0.186514	0.00038315	0.727365
Solyc04g081350	Transcription factor E2FC	E2FC	E2F/DP/RB	AT1G47870	E2FC	2.283	7.882	4.129	4.0935		7.32667	5.373	7.13633	4.43033	1.64857	0.879894	0.779849	-0.578165	-0.231464	-1.00219	1.94702e-05	0.0294501	0.0599778	0.068463	0.506672	0.00131131
Solyc06g074010	Transcription factor E2FB	E2FB	E2F/DP/RB	AT5G22220	E2FB	11.8945	9.71	8.1485	8.2395		10.4363	7.12667	9.355	9.294
Solyc09g010670	Transcription factor DP	DPA	E2F/DP/RB	AT5G02470	DPA	3.776	7.799	8.95	10.4645		4.879	9.16533	9.53833	10.9427	0.897153	1.26039	1.406	0.779236	0.771989	0.889217	1.56038e-09	3.86745e-18	3.44124e-22	3.80394e-12	6.85934e-12	1.42958e-15
Solyc09g091280	Retinoblastoma-related protein	RBR1	E2F/DP/RB	AT3G12280	RB1	30.897	49.9815	44.5765	44.6075		34.4443	50.1377	50.588	51.5147
Solyc10g078430	Transcription factor-like protein DPB	DPB	E2F/DP/RB	AT5G03415	DPB	15.1575	16.19	10.673	12.535		15.4843	13.8247	13.7443	15.8133
Solyc11g068800	Transcription factor E2FB	E2FB	E2F/DP/RB	AT5G22220	E2FB	9.4135	12.282	9.996	10.414		9.45067	8.54033	8.42333	8.48233
Solyc01g108610	Cyclin-dependent kinase inhibitor	CDKIA	KRP	AT1G49620	ICK5	4.507	2.207	1.3675	0.96		3.98733	1.38333	1.87167	0.792
Solyc02g079520	Calcium-binding protein PBP1	PBP1A	KRP			2.464	1.7005	2.6605	9.685		2.83433	0.884	0.853	1.27933	-0.660559	0.151587	1.93901	-1.80892	-1.92841	-1.42772	0.267213	0.8223	0.000359757	3.23171e-05	1.05931e-05	0.00125277
Solyc02g090680	Cyclin-dependent kinase inhibitor	CDKIB	KRP	AT2G23430	ICK1	25.183	21.4535	20.904	30.444		15.9797	19.6863	14.5693	14.3393
Solyc03g044480	cyclin-dependent protein kinase inhibitor SMR1-like	CDKI1	KRP			16.6765	2.833	3.7705	5.4275		2.053	1.91167	1.315	1.91333	-2.69396	-2.11894	-1.67243	-0.231852	-0.839258	-0.382756	1.18434e-07	3.64131e-05	0.0014613	0.622264	0.0590126	0.418777
Solyc03g061600	Cell division cycle protein 27-like protein B	CDC27B	KRP	AT2G20000	HBT	34.181	31.931	31.0315	32.8355		39.6557	29.741	40.6927	43.7063
Solyc07g053050	Calcium-binding protein PBP1	PBP1B	KRP			7.0865	3.375	2.8205	4.0715		54.2117	2.675	2.37167	4.965	-1.19012	-1.28406	-0.846596	-4.47107	-4.71106	-3.72424	0.010085	0.00521565	0.0786416	6.29796e-38	7.12107e-42	8.692e-27
Solyc09g061280	p27KIP1-related-protein 2	ICK2	KRP			19.267	31.4025	21.4585	21.0305		23.6763	40.4437	27.596	28.893
Solyc09g091780	LES441249 p27KIP1-related-protein 1	ICK1	KRP	AT2G32710	ICK7	36.1545	52.732	45.1825	43.205		14.927	28.4953	40.888	44.233	0.41391	0.355144	0.212002	0.801874	1.25744	1.29006	0.0802685	0.139167	0.411169	7.83221e-06	1.32568e-12	3.37785e-13
Solyc10g006660	Calcium-binding protein PBP1	PBP1/KRP1	KRP	AT4G27280 / AT5G54490	CMI1 / PBP1	47.191	15.1965	5.1595	9.9495		350.441	18.1277	5.94633	10.5483	-1.76086	-3.15133	-2.28182	-4.40211	-6.0762	-5.32603	0.0494665	0.000246075	0.0102509	6.49637e-11	1.30203e-19	2.75189e-15
Solyc12g098310	Cyclin-dependent kinase inhibitor	CDKI	KRP	AT5G48820	KRP3	97.9905	35.981	33.5875	46.5335		14.003	17.594	18.0567	32.0073	-1.57501	-1.51281	-1.11581	0.197573	0.170075	0.9155	1.38974e-06	3.55678e-06	0.000882528	0.50134	0.581483	0.000716756
Solyc01g086690	Sister chromatid cohesion 1 protein 4	SYN3	mitotic spindle checkpoint	AT3G59550	ATSYN3	1.0075	7.256	2.596	4.4555		3.77133	5.981	8.061	5.11967	2.6298	1.31203	2.00588	0.535206	0.901533	0.16418	3.29881e-18	3.28308e-05	7.96287e-11	0.0254839	0.000123085	0.540706
Solyc01g088390	Sister chromatid cohesion protein DCC1	DCC1	mitotic spindle checkpoint	AT2G44580		7.267	15.9755	9.3745	12.1735		9.18567	12.0147	13.0783	11.303	1.02596	0.421444	0.717239	0.256342	0.314788	0.0220732	2.07004e-07	0.0452575	0.000434491	0.123952	0.0594647	0.91148
Solyc01g103040	mitotic spindle checkpoint protein MAD1	MAD1	mitotic spindle checkpoint	AT5G49880	MAD1	8.4395	20.707	24.925	23.795		22.4097	29.7183	33.1827	25.4197	1.1733	1.60668	1.45465	0.277025	0.371898	-0.0953164	5.82777e-09	4.89624e-16	3.49185e-13	0.100776	0.0271345	0.612143
Solyc01g104490	Separase	ESP	mitotic spindle checkpoint	AT4G22970	ESP	7.5225	13.348	11.537	10.583		17.5407	12.7943	24.3403	17.8457
Solyc01g104570	kinetochore protein NDC80 homolog	NDC80	mitotic spindle checkpoint	AT3G54630	NDC80	11.0195	17.002	20.187	20.2655		16.3327	17.1263	27.4463	20.776
Solyc01g107160	Mitotic checkpoint protein BUB3, putative, expressed	BUB3.1/3.2	mitotic spindle checkpoint	AT1G49910 / AT3G19590	BUB3.1 / 3.2	30.606	39.2295	33.0455	42.6125		42.5097	31.7207	57.2993	47.752
Solyc02g066980	TPX2	MD60/TPXL5	mitotic spindle checkpoint	AT3G01015	TPXL1	0.2935	0.624	1.0355	1.6475		1.49967	0.618	5.80233	2.747	0.852048	1.74807	2.32712	-1.40736	1.76	0.596525	0.360175	0.0432807	0.00641825	0.0337494	0.00724396	0.405192
Solyc03g007060	Cell cycle regulated microtubule associated protein	TPXL8	mitotic spindle checkpoint			1.132	10.738	35.626	24.4075		4.47833	7.06867	11.2753	9.26933	3.11773	5.01219	4.37762	0.530591	1.13898	0.769143	7.36058e-14	1.21733e-34	1.9826e-26	0.128685	0.000727074	0.0266827
Solyc03g059030	CDK5RAP3-like protein	CDK5RAP3l	mitotic spindle checkpoint	AT5G06830	C53	42.1345	37.6075	43.714	48.289		30.3447	53.604	47.9067	51.374
Solyc03g097400	CDT1 Geminin-binding domain-like protein	MZT1	mitotic spindle checkpoint	AT1G73790 / AT4G09550	GIP1b / ATGIP1	2.525	4.3725	1.8515	2.311		6.22733	2.253	3.92633	2.54167	0.663738	-0.411698	-0.178766	-1.59644	-0.860167	-1.56891	0.0174516	0.166488	0.586494	1.32854e-14	4.28188e-05	3.21111e-14
Solyc03g114520	Centromere protein Mis12	MIS12	mitotic spindle checkpoint	AT5G35520	MIS12	4.5995	11.0815	7.327	9.8055		9.821	7.215	13.0197	10.1263	1.1372	0.704559	1.0428	-0.57432	0.212775	-0.23194	2.12518e-07	0.00183564	2.58542e-06	0.00105802	0.261861	0.220146
Solyc03g116920	Sister chromatid cohesion PDS5-like protein	PDS5	mitotic spindle checkpoint			1.332	3.8905	2.9915	6.2915		7.139	3.73567	8.72067	4.939	1.42913	1.21482	2.21213	-1.06477	0.0943745	-0.809735	0.0111844	0.0331438	5.65991e-05	0.0155443	0.858509	0.0762256
Solyc03g120340	centromere protein C1	CENP-C	mitotic spindle checkpoint	AT1G15660	CENP-C	20.8145	17.643	22.111	28.5195		34.6587	20.7487	37.4617	40.2197
Solyc04g009330	Serine/threonine-protein kinase Aurora-3	AUR3	mitotic spindle checkpoint	AT2G45490	AUR3	7.825	11.0645	5.974	7.956		9.753	10.1247	15.1023	10.57
Solyc04g014550	TPX2	TPX2	mitotic spindle checkpoint	AT5G37478	TPXL6	0.116	1.249	0.016	0.075		11.108	0.245333	3.36467	6.01233	3.35383	-2.68997	-0.635498	-5.62554	-1.91591	-1.1569	2.59435e-05	0.0197537	0.546656	9.99213e-24	0.00065764	0.0470548
Solyc04g082900	Mitotic spindle checkpoint protein BUBR1	BUBR1	mitotic spindle checkpoint	AT2G33560	BUBR1	33.3005	12.5535	13.24	22.6435		26.4427	15.5353	40.714	24.3697	-1.54238	-1.30011	-0.60714	-0.897139	0.428444	-0.394772	2.12645e-16	5.14795e-12	0.0021521	4.32535e-09	0.00715242	0.0140953
Solyc05g012720	mitotic checkpoint protein BUB3.3	BUB3.3	mitotic spindle checkpoint	AT1G69400		4.8495	7.927	3.862	3.7365		6.13067	5.176	7.10767	5.25967
Solyc05g014370	Mitotic spindle checkpoint protein MAD2	MAD2	mitotic spindle checkpoint	AT3G25980	MAD2	9.438	9.4355	9.043	18.666		20.0527	8.66633	34.694	20.1887	-0.129817	-0.0241873	0.942652	-1.3385	0.597533	-0.265646	0.776955	0.963005	0.0145814	5.50139e-06	0.0550698	0.427558
Solyc05g026510	Sister-chromatid cohesion protein 3	SCC3	mitotic spindle checkpoint	AT2G47980	SCC3	44.266	53.309	67.681	64.6335		47.5083	81.7107	73.517	81.8833
Solyc05g043350	Centromere/kinetochore protein zw10-like protein	ZW10	mitotic spindle checkpoint	AT2G32900	ATZW10	30.3895	26.3925	30.412	27.545		25.4683	38.1987	32.7527	39.9447
Solyc06g051040	Mitotic checkpoint serine/threonine-protein kinase BUB1-like protein	BUB1L	mitotic spindle checkpoint	AT5G05510		1.285	1.7595	2.011	3.848		2.554	2.59733	11.6717	6.38367	0.326839	0.685414	1.54192	-0.10675	1.99795	1.04655	0.508768	0.136575	0.000367162	0.783327	1.04194e-09	0.00209145
Solyc06g065710	Sister chromatid cohesion PDS5-like protein	PDS5C	mitotic spindle checkpoint	AT4G31880	PDS5C	132.636	120.683	123.507	141.16		115.117	174.131	155.86	164.193
Solyc07g049680	Condensin complex subunit 2	CAP-H	mitotic spindle checkpoint	AT2G32590	CAP-H	6.536	6.872	7.358	12.541		21.7073	11.1127	25.433	16.4457	-0.0537857	0.21086	0.901128	-1.09567	0.0353587	-0.676549	0.881486	0.513591	0.00169845	6.20947e-07	0.896779	0.00295873
Solyc07g053790	Protein TPX2	TPX2	mitotic spindle checkpoint	AT1G03780	TPX2	3.8455	2.32	4.445	9.3335		7.05933	2.54467	15.4807	9.57767	-0.862892	0.24034	1.23038	-1.60164	0.939929	0.163692	0.113769	0.694097	0.020871	8.67347e-05	0.0264682	0.735757
Solyc07g053820	Mitotic checkpoint serine/threonine-protein kinase BUB1	BUB1	mitotic spindle checkpoint	AT2G20635		2.808	5.1425	4.752	8.4735		10.137	5.81867	17.1177	9.626	0.735697	0.786057	1.53821	-0.930139	0.563366	-0.351145	0.157284	0.128239	0.00181449	0.017692	0.17238	0.415943
Solyc08g066050	Protein kinase domain	AUR1	mitotic spindle checkpoint	AT2G25880 / AT4G32830	AUR2 / AUR1	6.6135	6.5335	8.0365	22.4735		18.1253	6.377	45.9783	23.1803	-0.150702	0.315495	1.72371	-1.635	1.1505	0.0794121	0.793769	0.556751	0.000235696	9.49082e-06	0.00239012	0.862787
Solyc08g079760	Protein TPX2	TPXL2	mitotic spindle checkpoint	AT4G22860	TPXL3	3.9075	4.0025	8.36	19.2695		9.21233	6.447	22.102	18.0277	-0.123055	1.10476	2.23017	-0.644899	1.06797	0.692165	0.44065	2.14752e-17	2.01374e-70	4.62317e-11	1.04655e-30	2.09464e-13
Solyc09g055340	MAU2 chromatid cohesion factor homolog	MAU2	mitotic spindle checkpoint	AT5G51340	SCC4	58.8965	59.742	54.9745	63.8805		49.6853	48.5177	66.3083	77.0027
Solyc10g008210	Protein TPX2	TPX2	mitotic spindle checkpoint			5.288	4.698	6.9095	19.031		14.498	4.72333	36.722	19.1343	-0.307144	0.416159	1.80186	-1.74767	1.1475	0.123074	0.574495	0.433406	0.000139049	2.70396e-06	0.00273004	0.785336
Solyc10g019040	kinetochore protein Nuf2	NUF2	mitotic spindle checkpoint	AT1G61000	NUF2	79.014	70.132	50.173	57.405		63.634	55.9077	50.9353	62.8307
Solyc10g079730	Condensin complex subunit 1	CBL	mitotic spindle checkpoint	AT3G57060	CAP-D2	4.25	5.742	7.5265	11.4395		12.464	6.83867	23.5137	15.0493	0.30274	0.858911	1.37702	-0.99591	0.722413	-0.00622675	0.570627	0.0762481	0.00347965	0.00737988	0.0604921	0.989174
Solyc11g007640	Mitotic checkpoint protein BUB3, putative, expressed	BUB3	mitotic spindle checkpoint			1.4245	0.8845	1.2195	1.5545		0.657667	0.614	1.52733	1.468	-0.77699	-0.151716	0.119776	-0.233871	1.02078	0.882333	0.106583	0.784268	0.835076	0.573278	0.00618845	0.0192693
Solyc11g008740	Sister chromatid cohesion 1 protein 4	SYN4	mitotic spindle checkpoint	AT5G16270	SYN4	66.2685	54.348	88.547	75.955		62.5073	78.004	79.3957	89.4333
Solyc11g011370	Condensin complex subunit 3	EMB2656	mitotic spindle checkpoint	AT5G37630	EMB2656	7.2045	7.5115	8.9145	13.141		17.465	9.20067	30.6183	18.82	-0.0691038	0.343402	0.819963	-1.05421	0.616477	-0.169092	0.895093	0.455456	0.0569362	0.00123088	0.0712741	0.655821
Solyc12g005050	AUGMIN subunit 4	AUG4	mitotic spindle checkpoint	AT1G50710	AUG4	21.12	22.8905	20.983	19.6205		20.886	16.2737	24.7397	19.4987
Solyc12g005480	Protein TPX2	TPX2	mitotic spindle checkpoint			3.407	3.857	4.18	12.5645		9.718	2.736	21.654	12.3037	0.0435634	0.325611	1.83057	-1.9585	0.962827	0.0624793	0.94059	0.512412	2.35161e-05	8.84525e-09	0.00639433	0.882823
Solyc12g095870	Aurora kinase A-A	AURKA	mitotic spindle checkpoint	AT2G25880 / AT4G32830	AUR2 / AUR1	3.1785	4.3155	5.724	11.3385		8.96833	4.588	23.3597	13.4563	0.310081	0.884237	1.79328	-1.09563	1.18883	0.311008	0.519577	0.0427535	1.72863e-05	0.00103473	0.000376766	0.402698
Solyc01g089850	cyclinU4_1	CYCP4;1	other cyclins	AT2G44740	CYCP4;1	37.139	15.86	3.6665	2.3625		10.0387	6.83467	10.6563	6.65933	-1.35544	-3.30428	-4.029	-0.68384	-0.109062	-0.865426	0.0071443	5.83036e-12	5.08345e-17	0.0993765	0.820863	0.0378822
Solyc01g090800	cyclinU2_1	CYCU2-2/-1	other cyclins	AT2G45080 / AT3G60550	CYC3;1 / P3;2	4.083	19.1825	14.045	4.4805		19.041	6.22267	4.57133	2.399	2.11154	1.82579	0.0870829	-1.74039	-2.25264	-3.25917	0.000288159	0.00187151	0.912858	0.000173899	1.13618e-06	1.0233e-12
Solyc01g098350	L1_1	CYCL1-1	other cyclins	AT2G26430	RCY1	28.7385	24.7915	22.2085	28.4225		23.6073	28.1083	31.247	31.092
Solyc01g098930	cyclinU3_2	CYCU3-2	other cyclins	AT3G05327		7.8895	7.4395	3.422	4.309		4.91667	3.25467	3.69033	5.40233	-0.204097	-1.16208	-0.911485	-0.724257	-0.60934	-0.138622	0.596048	0.000506735	0.00797641	0.00766879	0.0286704	0.656244
Solyc01g099310	cyclinH1_1	CYCH1-1	other cyclins	AT5G27620	CYCH;1	5.212	7.044	8.7895	9.6425		5.829	12.3537	12.0327	11.0533
Solyc03g093790	cell division cycle 20.2, cofactor of APC complex-like	CYCU4-2	other cyclins			0.4055	18.5245	9.291	3.3355		7.27767	8.88	9.97933	7.492	5.33675	4.50495	2.92735	0.157832	0.260797	-0.22953	3.13319e-32	2.9296e-23	3.53647e-10	0.683939	0.506165	0.561413
Solyc04g072880	CycH1_2	CYCH;1	other cyclins	AT5G27620	CYCH;1	18.6565	14.4485	12.791	14.1225		12.4157	11.87	10.8683	16.0117
Solyc04g078500	cyclinJ18	CYCJ18	other cyclins	AT2G01905	CYCJ18	5.1595	1.6255	1.7205	2.166		6.465	2.17067	2.855	2.91033	-1.80568	-1.56102	-1.31142	-1.70651	-1.37666	-1.42818	2.44315e-06	4.88376e-05	0.00081687	1.61043e-08	6.69642e-06	2.89445e-06
Solyc06g083260	cyclin1_1	CYCLINC1-2/CYCC1-1	other cyclins	AT5G48630 / AT5G48640	CYCLINC1-2 / CYCLINC1-1	65.202	43.4895	29.134	35.9495		40.4217	30.3763	27.5903	41.5697	-0.713044	-1.12728	-0.903898	-0.542625	-0.74612	-0.235484	2.88672e-09	1.19201e-21	3.72829e-14	2.42681e-08	1.28254e-14	0.0217865
Solyc07g032480	cyclinT1_2	CYCT1-3	other cyclins			34.7425	24.752	26.964	24.387		21.2797	26.6303	22.8027	37.2307
Solyc07g052610	cyclinU1_1	CYCU1-1	other cyclins	AT3G21870	CYCP2;1	0.4005	10.2005	10.4965	8.687		16.6823	3.129	4.79733	3.27533	4.5156	4.71736	4.3675	-2.54633	-1.99354	-2.62566	1.5437e-35	7.06161e-39	3.58158e-33	4.05255e-24	2.67032e-15	1.43314e-25
Solyc09g065200	cyclinU3_1	CYCU3-1	other cyclins	AT3G63120	CYCP1;1	50.758	71.183	61.759	44.876		43.415	62.5063	54.614	36.9563
Solyc09g075760	cyclinT1_3	CYCT1-3	other cyclins			70.9455	50.401	56.022	52.5255		38.0897	41.007	47.0127	71.201
Solyc10g078180	cyclinT1_1	CYCT1-1	other cyclins	AT4G19600 / AT5G45190	CYCT1;4	119.156	98.3375	92.948	101.35		81.1603	96.0703	95.2723	105.864
Solyc02g067810	Cyclin-dependent protein kinase inhibitor SMR6	SMR6	SIM (KRP-like)	AT5G40460	SMR6	1.9145	7.425	4.15	5.2895		4.264	4.42367	4.00433	4.34167	1.78126	1.10917	1.38052	-0.076857	-0.28541	-0.251405	1.33105e-10	0.000103079	1.13833e-06	0.7611	0.234957	0.301161
Solyc03g071710	WD40 repeat	SMR1L	SIM (KRP-like)			25.841	43.9245	20.205	23.1555		62.86	19.773	18.9133	18.5803	0.63236	-0.322898	-0.204416	-1.79911	-1.92734	-2.03441	1.00075e-07	0.00965192	0.120498	3.81807e-85	9.12e-98	4.15847e-109
Solyc05g053050	Cyclin-dependent protein kinase inhibitor SMR4	SMR4	SIM (KRP-like)	AT5G02220	SMR4	0.1785	0.3105	3.1315	3.112		0.301	0.1	0.551	0.578	0.840213	4.33502	4.26216	-1.71698	0.675858	0.663769	0.344848	1.23453e-08	2.71446e-08	0.00847028	0.300192	0.310687
Solyc10g086450	cyclin-dependent protein kinase inhibitor SMR3	SMR3	SIM (KRP-like)			0	1.2745	9.3365	14.97		0.267	0.051	0.243	0.956	8.75271	11.7869	12.3868	-2.52596	-0.333926	1.56774	8.50816e-07	1.4447e-11	1.45567e-12	0.00277791	0.712578	0.0467985
Solyc11g066000	cyclin-dependent protein kinase inhibitor SMR3-like	SMR3L	SIM (KRP-like)	AT5G59360	SMR113	7.404	4.4445	1.382	1.748		2.95067	2.33033	5.03333	7.991	-0.859136	-2.37857	-2.12734	-0.469338	0.575849	1.16222	0.00889826	6.59002e-14	2.8565e-11	0.0855868	0.0330177	6.56762e-06
Solyc01g097140	Arsenate reductase 2.1		WEE1/CDC25	AT5G03455	ACR2	22.804	44.0965	22.58	25.602		25.9607	28.571	22.0773	21.1303
Solyc09g074830	protein kinase WEE1	WEE1	WEE1/CDC25	AT1G02970	WEE1	1.848	2.9795	3.654	5.205		3.06867	3.643	7.419	4.59967	0.557269	1.01691	1.4434	0.11794	1.07998	0.307162	0.0858613	0.000965756	1.88309e-06	0.658668	4.22869e-06	0.23417

## Sheet: TableS6
Table S4. Annotation and classification of genes associated with ROS production and detoxification
			apical					basal					fold change							FDR
Gene ID	Gene Name	Family	0 hae	24 hae	96 hae	192 hae		0 hae	24 hae	96 hae	192 hae		0-24 apical	0-96 apical	0-192 apical	0-24 basal	0-96 basal	0-192 basal		0-24 apical___padj	0-96 apical___padj	0-192 apical___padj	0-24 basal___padj	0-96 basal__padj	0-192 basal__padj
Solyc06g005160	LeAPx01	Ascorbate peroxidase	335.118	990.148	1474.78	1228.62		635.526	1711.65	1239.83	636.341		1.42978	2.17064	1.8328	1.29987	0.769701	-0.275223		4.6835e-11	2.52002e-24	1.78657e-17	9.7741e-14	1.82131e-05	0.154775
Solyc06g005150	LeAPx03	Ascorbate peroxidase	145.008	170.28	226.579	225.785		198.251	368.411	256.227	182.213
Solyc09g007270	LeAPx04	Ascorbate peroxidase	14.055	16.567	12.992	22.9475		309.755	57.5493	35.189	46.3067		0.102076	-0.0841126	0.665615	-2.55632	-3.32984	-3.0211		0.851813	0.879006	0.158873	3.48424e-14	3.91485e-23	3.43063e-19
Solyc01g111510	LeAPx05	Ascorbate peroxidase	182.533	259.753	267.061	285.233		167.751	152.795	192.769	222.648
Solyc02g083620	LeAPx06	Ascorbate peroxidase	13.2065	12.583	5.037	6.5845		9.62567	2.41567	5.25133	5.042		-0.194005	-1.35077	-1.04094	-2.12475	-1.06839	-1.20826		0.605545	2.60243e-05	0.00157025	8.19324e-17	4.08147e-05	3.1185e-06
Solyc06g060260	LeAPx07	Ascorbate peroxidase	62.35	153.974	101.288	85.068		89.808	184.085	119.415	98.5233		1.17582	0.736894	0.401327	0.904935	0.216381	-0.142185		4.28014e-26	7.38018e-11	0.000694854	6.40123e-24	0.0253026	0.156228
Solyc11g018550	LeAPx08	Ascorbate peroxidase	27.357	37.1435	32.1915	26.0555		30.073	11.5477	18.1577	19.2843		0.313343	0.27065	-0.114818	-1.51185	-0.92293	-0.918352		0.0668437	0.118776	0.551747	1.02678e-32	5.87359e-13	7.49203e-13
Solyc04g074640	LeAPx09	Ascorbate peroxidase	97.696	77.844	90.193	55.539		91.845	7.862	42.0753	25.955		-0.457149	-0.082876	-0.865724	-3.67515	-1.31994	-2.09712		0.182725	0.835416	0.00842115	2.85792e-50	1.93378e-07	4.02962e-17
Solyc02g083630	LeAPx10	Ascorbate peroxidase	19.025	18.8085	6.8985	8.0385		11.7267	1.65167	3.85767	5.95033		-0.143307	-1.42709	-1.29106	-2.95609	-1.79798	-1.25296		0.710894	7.91597e-06	6.66423e-05	9.10064e-31	2.06503e-12	1.27626e-06
Solyc01g100630	LeKat01	Catalase	0.7865	0.615	0.9595	0.756		0.645	0.348	0.578333	1.10133
Solyc04g082460	LeKat02	Catalase	12.851	11.277	9.883	15.7715		11.738	20.2487	19.4803	21.1103
Solyc01g099420	LeKat03	Catalase	0.322	0.248	0.592	0.5005		0.488	0.494667	0.53	0.481333
Solyc12g094620	LeKat04	Catalase	4029.34	3495.26	7357.61	8303.4		3832.44	3334.27	6631.45	5971.12
Solyc02g082760	LeKat05	Catalase	112.683	262.19	392.286	347.494		442.936	219.093	229.931	221.065		1.08624	1.82996	1.57179	-1.14678	-1.14143	-1.27916		3.9309e-10	4.15003e-27	4.37205e-20	1.27291e-16	2.33535e-16	3.06293e-20
Solyc03g033700	LePrx[P]107	Class III peroxidase
Solyc09g018590	LePrx[P]109	Class III peroxidase
Solyc02g032830	LePrx[P]62	Class III peroxidase
Solyc10g075120	LePrx[P]83	Class III peroxidase
Solyc01g067880	LePrx[P]85	Class III peroxidase
Solyc10g076230	LePrx[P]89	Class III peroxidase
Solyc07g052510	LePrx01	Class III peroxidase	96.21	1460.39	532.26	173.444		236.325	435.193	563.071	352.412		3.79321	2.50154	0.800218	0.75138	1.05816	0.302625		3.1064e-130	5.40078e-57	1.26846e-06	9.46964e-09	4.04691e-16	0.0299763
Solyc07g047740	LePrx02	Class III peroxidase						0.244667	0.064	5.81933	3.31733		-2.34044	-0.737271	-1.40998	-2.05464	4.38253	3.49309		0.037908	0.538225	0.228646	0.0235638	6.81838e-08	2.19252e-05
Solyc02g083490	LePrx03	Class III peroxidase	59.167	72.4115	21.1965	43.0605		102.249	18.8267	93.1673	112.472		0.164045	-1.44293	-0.509294	-2.56977	-0.328302	-0.13639		0.722607	0.000168593	0.23014	8.65132e-18	0.335925	0.708532
Solyc08g075830	LePrx04	Class III peroxidase						0.0126667	0.013	5.58867	2.83667		0	2.66387	3.37299	-0.0985304	8.60531	7.55102		1	0.230134	0.116061	0.952765	1.35555e-14	1.90764e-11
Solyc01g006300	LePrx05	Class III peroxidase	40.44	367.693	36.475	44.313		580.338	964.216	240.581	252.447		3.05373	-0.11011	0.0927271	0.600526	-1.46774	-1.47846		4.64442e-08	0.879444	0.903702	0.216502	0.00162468	0.00153185
Solyc01g105070	LePrx06	Class III peroxidase	82.5175	308.628	89.9625	48.858		253.982	578.005	341.594	400.985		1.7704	0.156601	-0.804547	1.05473	0.232665	0.383335		2.24849e-10	0.642201	0.00648489	3.4766e-06	0.362849	0.118844
Solyc04g080760	LePrx07	Class III peroxidase	0.0945	1.202	0.1775	0.254		15.9477	7.425	50.6557	60.108		3.25911	0.668044	1.09749	-1.23442	1.47083	1.64		3.48911e-06	0.425241	0.173442	0.00962897	0.00207852	0.000563284
Solyc02g092580	LePrx08	Class III peroxidase	62.1755	630.038	129.013	62.0295		259.288	458.784	444.269	299.664		3.20924	1.08673	-0.0518519	0.693174	0.582693	-0.0696403		2.34092e-57	1.94495e-07	0.850863	4.22987e-05	0.000742665	0.731077
Solyc04g071890	LePrx09	Class III peroxidase	38.3165	183.386	93.18	103.058		143.144	167.475	355.24	216.081
Solyc10g076240	LePrx10	Class III peroxidase	23.4355	117.538	27.1915	14.1985		448.284	233.715	283.65	269.484
Solyc05g046030	LePrx100	Class III peroxidase	5.7335	0.4935	0.21	0.3585		0.84	1.08633	4.34	2.55433		-3.66542	-4.72471	-4.05198	0.243526	2.17397	1.33214		8.06689e-15	9.07836e-22	4.77057e-17	0.575158	9.95586e-09	0.000657248
Solyc12g009950	LePrx101	Class III peroxidase
Solyc12g005370	LePrx102	Class III peroxidase						0.587	0.238	15.9157	11.8847		0.227182	-0.667601	0.387816	-1.4191	4.57343	4.08107		0.90193	0.715453	0.832768	0.123892	8.84338e-08	2.1276e-06
Solyc03g033690	LePrx103	Class III peroxidase
Solyc07g052530	LePrx105	Class III peroxidase						0.178667	0.272333	5.673	2.792		-3.98428	-5.49346	-2.38227	0.484345	4.7959	3.69704		0.000134849	5.55171e-05	0.0121313	0.527451	3.75187e-13	3.24511e-08
Solyc03g120800	LePrx106	Class III peroxidase	0.856	0.836	2.3755	1.66		1.454	0.500333	1.17733	0.688333		-0.110304	1.55958	0.961904	-1.66562	-0.498404	-1.3508		0.864993	0.002181	0.0746812	3.80375e-05	0.248737	0.000900701
Solyc07g052550	LePrx108	Class III peroxidase
Solyc05g052280	LePrx11	Class III peroxidase	12.3835	59.7635	124.504	95.6105		250.318	380.182	228.576	172.737		2.13327	3.36518	2.90256	0.469298	-0.329005	-0.81884		0.0420343	0.000906434	0.00509143	0.602881	0.732263	0.36466
Solyc11g039570	LePrx110	Class III peroxidase						0.019	0.00666667	2.02467	0.838667		0	0	0	-1.68056	6.56051	5.20687		1	1	1	0.354923	3.2075e-07	6.38957e-05
Solyc11g007220	LePrx111	Class III peroxidase						0.00933333	0.00666667	9.332	4.91533		-4.44806	0.538861	1.71384	-0.694317	9.75711	8.75442		0.0176231	0.664621	0.110178	0.678297	4.39136e-23	9.85678e-19
Solyc05g046010	LePrx12	Class III peroxidase	68.024	61.696	10.6465	7.647		89.2313	81.7517	135.547	97.7837		-0.273955	-2.64253	-3.20858	-0.255921	0.408713	-0.143471		0.414639	3.61088e-20	6.42718e-29	0.320762	0.108919	0.605664
Solyc10g076210	LePrx13	Class III peroxidase	0.0255	0.0615	0.1855	1.0795		0.797	0.535	3.897	6.54867		1.075	2.83878	5.30673	-0.703983	2.09691	2.76684		0.390055	0.00864744	2.15415e-07	0.223975	9.20909e-05	1.67608e-07
Solyc02g087190	LePrx14	Class III peroxidase	82.659	150.99	89.6925	57.649		164.184	96.1057	138.763	71.593		0.737629	0.151475	-0.571115	-0.902708	-0.436566	-1.47363		0.0156	0.666072	0.0707121	0.000142954	0.083076	3.39187e-10
Solyc07g052540	LePrx15	Class III peroxidase						0.0593333	0.168333	2.947	1.358		-4.48381	-1.65362	-2.34508	1.37294	5.43169	4.23942		0.0216425	0.216958	0.104093	0.143881	2.23822e-10	1.0518e-06
Solyc04g071900	LePrx16	Class III peroxidase	166.16	167.697	384.346	492.927		181.261	269.829	699.884	707.873		-0.118972	1.24314	1.51816	0.444344	1.75523	1.68658		0.780159	0.000324457	1.02747e-05	0.126527	1.24609e-10	7.08536e-10
Solyc02g080530	LePrx17	Class III peroxidase	795.398	1370.47	3190.74	3558.96		1312.53	1045.25	1931.23	1764.49		0.652928	2.0362	2.11002	-0.457324	0.363142	0.15041		0.00016281	3.14872e-35	1.36898e-37	0.00105258	0.0114216	0.330015
Solyc12g005790	LePrx18	Class III peroxidase						0	0	1.324	1.32967		-2.14727	-2.0954	0.476369	0	9.38517	9.31061		0.379521	0.392044	0.844989	1	1.19162e-12	1.90801e-12
Solyc09g072700	LePrx19	Class III peroxidase	4.3855	2.13	2.9775	1.1125		0.608333	0.927333	7.98567	3.93967		-1.1829	-0.532855	-2.04462	0.476161	3.5183	2.41923		0.0374306	0.381977	0.000239996	0.331118	6.898e-16	5.04509e-08
Solyc06g076630	LePrx20	Class III peroxidase	396.43	84.507	35.018	43		184.409	38.666	65.011	56.2743		-2.36062	-3.46982	-3.25516	-2.3854	-1.70072	-1.9886		1.48258e-22	8.41228e-48	5.20648e-42	2.48016e-34	6.39897e-18	4.42601e-24
Solyc03g006700	LePrx21	Class III peroxidase	0.3025	42.299	40.235	75.5335		20.778	57.7567	175.367	185.568		6.93262	7.03873	7.87504	1.34259	2.88067	2.87959		6.40396e-11	2.86219e-11	9.65099e-14	0.134067	0.000884042	0.000911805
Solyc00g072400	LePrx22	Class III peroxidase
Solyc02g082090	LePrx23	Class III peroxidase						0.131667	0.0196667	22.46	11.382		-3.26922	2.04398	4.38375	-2.90203	7.22261	6.16586		0.132519	0.167554	0.00116537	0.00163687	1.18733e-28	4.23592e-21
Solyc02g084790	LePrx24	Class III peroxidase	0.2585	16.6675	138.387	97.7385		9.30433	54.6703	455.328	245.219		5.68644	8.9083	8.3263	2.4276	5.4208	4.44633		3.37506e-44	3.32958e-108	2.28959e-94	1.22118e-18	7.31343e-89	5.43524e-60
Solyc06g050440	LePrx25	Class III peroxidase	0.656	26.8405	57.645	84.5935		10.7767	22.127	114.714	86.4167		5.22989	6.50628	6.98708	0.913922	3.2232	2.72852		4.84734e-11	1.2799e-16	7.02698e-19	0.178426	4.48259e-07	2.33632e-05
Solyc11g018800	LePrx26	Class III peroxidase	1.364	13.265	10.311	3.622		3.904	58.736	21.133	12.4077		3.16612	2.97176	1.37521	3.78024	2.24106	1.3868		1.69923e-12	3.5738e-11	0.00396563	1.93327e-27	2.95166e-10	0.000144721
Solyc01g006290	LePrx28	Class III peroxidase	176.612	185.865	237.639	175.756		479.65	201.85	530.049	389.743		-0.053686	0.46522	-0.0555242	-1.3758	-0.0494077	-0.575524		0.919066	0.294255	0.920217	1.84348e-05	0.900967	0.094644
Solyc03g044100	LePrx29	Class III peroxidase	15.6685	403.085	271.303	129.595		50.8833	173.248	162.288	74.8247		4.55907	4.15541	3.00555	1.6382	1.47974	0.280444		1.98725e-56	4.19266e-47	7.12817e-25	5.24192e-12	6.76542e-10	0.297048
Solyc09g007520	LePrx30	Class III peroxidase	2.415	464.993	104.254	61.972		29.5257	538.028	193.941	306.4		7.45456	5.46597	4.62867	4.05896	2.52231	3.10256		4.85802e-76	2.98163e-41	1.2516e-29	6.40824e-36	1.95286e-14	2.7887e-21
Solyc01g108320	LePrx31	Class III peroxidase	1.906	0.9505	1.1455	1.601		0.025	0.187333	1.087	6.09233		-1.1513	-0.723412	-0.316059	2.7733	5.24101	7.65135		0.227435	0.465223	0.773699	0.00226992	1.8026e-09	4.38981e-19
Solyc03g080150	LePrx32	Class III peroxidase	0.088	0.2685	10.54	4.876		1.982	4.04767	66.842	56.1773		1.48616	6.948	5.76681	0.901892	4.88191	4.55029		0.0218199	6.77448e-35	4.66662e-24	0.00625181	6.00646e-56	1.06269e-48
Solyc05g046020	LePrx33	Class III peroxidase	122.809	29.2245	0.9835	1.1735		40.844	20.7103	54.52	20.5203		-2.20335	-6.93073	-6.76687	-1.10864	0.221788	-1.26471		1.30076e-13	4.78073e-115	1.69543e-109	5.90681e-06	0.424664	2.6436e-07
Solyc03g006810	LePrx34	Class III peroxidase	22.808	18.4225	3.386	4.5555		19.7493	5.70567	24.2543	21.1837		-0.438772	-2.71748	-2.37415	-1.91952	0.104161	-0.171393		0.406809	4.10728e-09	3.93117e-07	2.82329e-07	0.820353	0.701309
Solyc10g078890	LePrx35	Class III peroxidase						0.094	0	1.78767	3.958		4.67946	0	1.80254	-5.8711	4.05704	5.13132		0.0386122	1	0.525196	0.000783087	0.00102135	2.59906e-05
Solyc04g080330	LePrx37	Class III peroxidase
Solyc02g094180	LePrx38	Class III peroxidase	1.0545	16.911	15.821	19.0805		48.1683	39.388	36.3913	71.098		3.93082	4.00101	4.19731	-0.420492	-0.598856	0.286992		9.93865e-65	3.66957e-67	1.10242e-73	0.0122176	0.000327402	0.101921
Solyc05g055320	LePrx39	Class III peroxidase						0.0436667	0.0256667	6.64467	4.35767		0	2.68437	5.35972	-0.918296	7.04408	6.35915		1	0.18396	0.00246535	0.329036	3.22612e-26	1.70193e-21
Solyc01g015080	LePrx40	Class III peroxidase
Solyc04g081860	LePrx41	Class III peroxidase
Solyc08g007150	LePrx42	Class III peroxidase
Solyc01g101050	LePrx43	Class III peroxidase						0.229	0.61	0.428667	0.422
Solyc10g076190	LePrx44	Class III peroxidase	0.0095	0.146	0.419	0.7695		0.618333	0.2	0.646333	1.62733		3.38359	5.06899	5.87482	-1.75115	-0.128974	1.12496		0.0202705	0.000277621	2.33064e-05	0.00914051	0.870025	0.0965698
Solyc02g090470	LePrx45	Class III peroxidase						0.041	1.48467	0.209667	2.62433		3.83141	3.68993	4.69301	5.0565	2.1685	5.735		0.041915	0.0523927	0.0109436	4.08179e-12	0.00584831	3.59799e-15
Solyc05g046000	LePrx46	Class III peroxidase						0	0.0493333	7.14233	5.391		0	0	4.24785	4.72221	11.8167	11.3395		1	1	0.0288808	0.00161634	3.37012e-17	6.98989e-16
Solyc11g010120	LePrx47	Class III peroxidase	5.74	0.915	0.9525	3.206		13.973	2.707	6.77433	11.587		-2.77213	-2.54846	-0.875272	-2.49855	-1.23965	-0.551241		1.46675e-14	1.26638e-12	0.0202029	3.20077e-19	1.35882e-05	0.0663869
Solyc07g017880	LePrx48	Class III peroxidase	8.5485	0.5425	18.3075	6.1895		2.424	33.2417	43.3113	33.0777		-4.12356	1.12324	-0.523255	3.64878	3.96501	3.50031		0.000129315	0.343677	0.688706	1.86079e-05	3.72025e-06	5.1075e-05
Solyc01g058520	LePrx49	Class III peroxidase	3.2875	2.958	1.2685	1.605		1.814	1.90333	1.71633	1.79767		-0.283245	-1.34127	-1.08278	-0.0637729	-0.274939	-0.289825		0.276969	2.67144e-08	9.42799e-06	0.777269	0.193856	0.16757
Solyc05g010330	LePrx50	Class III peroxidase	0.0095	0	0.0185	4.5855		0.734667	0.109333	2.49867	24.1803		-16.3266	0.772039	8.66233	-2.87567	1.58048	4.77618		5.32402e-08	0.821434	0.00122424	0.144043	0.451215	0.0128549
Solyc10g076220	LePrx51	Class III peroxidase	0.0095	0.216	0.8715	13.533		2.67533	3.77733	54.3037	61.163		3.90995	6.08796	9.9818	0.370176	4.15057	4.24113		0.00201473	5.29817e-07	4.13302e-17	0.406879	8.04543e-26	6.8197e-27
Solyc08g069040	LePrx52	Class III peroxidase	185.518	17.034	3.098	1.1685		14.6497	26.3263	63.4347	35.783		-3.57676	-5.86891	-7.34857	0.716855	1.92082	1.01555		1.77205e-20	5.22733e-53	4.1183e-79	0.0306536	1.62177e-09	0.00210238
Solyc11g072920	LePrx54	Class III peroxidase	0.1305	54.244	20.0915	11.1145		3.672	11.2793	15.42	10.5773		8.42249	7.15429	6.22113	1.49096	1.87629	1.25074		1.34693e-98	3.41664e-71	1.22844e-53	2.47301e-13	2.03294e-20	1.33452e-09
Solyc01g007950	LePrx55	Class III peroxidase	0.56	0.3195	0.762	1.5085		1.19433	0.186	0.645667	2.23033		-0.90186	0.51666	1.43107	-2.80922	-1.07964	0.626454		0.0902998	0.333397	0.00336003	1.35058e-12	0.00428397	0.100507
Solyc12g096530	LePrx56	Class III peroxidase	3.453	1.707	1.235	2.5115		0.921333	0.289	0.269667	0.207		-1.14766	-1.44968	-0.500081	-1.80391	-1.96916	-2.42846		0.0226166	0.00348201	0.364154	1.72577e-05	3.08239e-06	1.05901e-08
Solyc02g085930	LePrx57	Class III peroxidase	5.8135	5.013	3.8245	3.1525		2.78667	2.56333	4.26633	3.55067
Solyc08g013930	LePrx58	Class III peroxidase						0.263333	0.679	14.488	7.77567		1.66135	1.73361	1.84135	1.24042	5.59117	4.62209		0.472804	0.450481	0.433464	0.0473805	5.3279e-22	2.59656e-15
Solyc01g006310	LePrx59	Class III peroxidase
Solyc07g049240	LePrx60	Class III peroxidase
Solyc06g082420	LePrx61	Class III peroxidase	0.019	0.6315	0	0		0.0186667	2.19933	0.548667	0.546333		4.62329	-3.83402	-3.68014	6.74087	4.67175	4.57812		0.00189603	0.0896407	0.109614	1.35631e-09	4.40633e-05	6.55348e-05
Solyc01g104860	LePrx63	Class III peroxidase						0.263	0.249	1.494	0.875667		-0.198183	-0.880593	-3.06944	-0.211667	2.30858	1.45973		0.797858	0.203483	8.83939e-05	0.715116	1.79037e-06	0.00351397
Solyc01g067860	LePrx64	Class III peroxidase	0.176	13.497	8.6255	4.298		43.7097	59.6027	366.836	244.951		6.13973	5.65448	4.54647	0.31885	2.87647	2.21234		1.89876e-07	1.69957e-06	0.000165651	0.764158	0.00232279	0.0217542
Solyc02g064970	LePrx65	Class III peroxidase						0.589	1.012	0.57	17.2017		2.56948	0.481265	1.14445	0.651493	-0.242545	4.5989		0.069722	0.796979	0.497969	0.247779	0.700448	1.28121e-19
Solyc03g033710	LePrx66	Class III peroxidase						0.301667	0.170667	5.583	8.553		3.74265	-0.458858	-1.36486	-0.944545	4.01799	4.55642		0.000736034	0.779515	0.44649	0.150583	3.71572e-12	2.49303e-15
Solyc02g062510	LePrx67	Class III peroxidase	0	0.638	0.0745	0.029		1.265	0.29	11.8243	18.11		7.75161	4.80993	3.39842	-2.2542	3.02873	3.56507		5.21732e-06	0.00722405	0.0825503	0.000177277	1.51609e-07	4.97856e-10
Solyc02g084800	LePrx68	Class III peroxidase	0.495	9.1235	24.962	34.167		21.8003	52.5553	204.279	195.131		4.10752	5.72737	6.10329	1.14018	3.03358	2.8869		2.88629e-18	6.43142e-35	2.2148e-39	0.0016527	4.89657e-18	2.16183e-16
Solyc02g090450	LePrx69	Class III peroxidase	0.2165	0.504	0.7345	0.3985							1.12378	1.8194	0.823154	0.976238	0.413202	5.51762		0.497922	0.249869	0.639208	0.479147	0.786527	6.02867e-06
Solyc02g084780	LePrx70	Class III peroxidase	0.2865	5.0175	91.728	121.882		10.4827	24.433	401.453	277.197		4.10247	8.46267	8.79395	1.09265	5.06555	4.45044		1.52851e-27	8.99251e-117	9.30684e-126	4.46336e-06	1.77398e-108	8.34383e-84
Solyc05g050880	LePrx71	Class III peroxidase						0.0373333	1.692	19.1037	3.68567		5.11906	6.07964	1.85627	5.36016	8.79186	6.33576		0.00201235	0.000174481	0.405712	2.01076e-24	8.86102e-65	7.66238e-34
Solyc03g025380	LePrx72	Class III peroxidase	28.1865	107.452	38.057	26.192		6.81367	146.757	80.9913	28.573		1.80096	0.469045	-0.142054	4.29937	3.37935	1.79103		1.39117e-07	0.214191	0.742261	1.40937e-57	7.80069e-36	9.47494e-11
Solyc04g076770	LePrx73	Class III peroxidase						0.044	0.044	0.783	0.962		-0.135553	-6.11144	-5.95756	-0.126654	3.95928	4.17873		0.931346	0.0017385	0.00255542	0.918784	3.67124e-05	1.26697e-05
Solyc02g079510	LePrx75	Class III peroxidase	1.8205	16.301	89.115	135.993		25.817	42.2143	138.898	100.078		3.0274	5.64639	6.17664	0.577228	2.23228	1.67693		1.58344e-27	7.20979e-95	3.61597e-113	0.00965102	7.35107e-26	5.27321e-15
Solyc02g079500	LePrx76	Class III peroxidase	9.6605	68.558	238.507	306.705		52.2707	107.33	595.452	570.909		2.69419	4.6652	4.94649	0.906369	3.31381	3.17308		0.000186832	2.44866e-11	1.63071e-12	0.135155	6.36429e-09	2.97968e-08
Solyc04g064690	LePrx77	Class III peroxidase
Solyc05g050890	LePrx78	Class III peroxidase	0	1.474	0.3155	0.0095		0.069	6.31633	9.94833	1.04133		8.95405	6.90134	1.83871	6.38314	6.97399	3.62902		1.55485e-07	6.98041e-05	0.438667	2.58345e-21	4.07143e-25	1.77723e-07
Solyc05g050870	LePrx79	Class III peroxidase	0.0045	2.337	0.616	0		0.0656667	9.03133	13.2457	1.342		8.25607	6.50604	-1.93293	6.96622	7.45426	4.05975		4.6696e-07	8.91748e-05	0.462911	4.27019e-20	9.9062e-23	2.02953e-07
Solyc06g054500	LePrx80	Class III peroxidase
Solyc10g084200	LePrx81	Class III peroxidase						0.698	0.0593333	16.216	8.06767		-2.61208	-1.38615	0.482896	-3.67515	4.34358	3.25614		0.00483292	0.108473	0.590576	7.05557e-09	2.184e-16	1.23675e-09
Solyc10g084240	LePrx82	Class III peroxidase	1.307	11.587	0.6855	1.3025		9.35233	39.304	27.8877	71.1927		3.02888	-0.882873	-0.0354314	1.94243	1.38128	2.65656		6.00995e-06	0.237501	0.973145	0.000275186	0.0124004	5.93054e-07
Solyc11g007210	LePrx86	Class III peroxidase						0.00933333	0.00666667	10.9447	5.91867		-0.16837	-2.11927	3.38095	-0.695741	9.98856	9.02641		0.923555	0.304921	0.0030696	0.674436	3.3876e-25	1.02755e-20
Solyc07g055190	LePrx87	Class III peroxidase	3.883	0.291	0.4325	1.418		1.21667	0.509	0.368333	0.778		-3.86572	-3.12722	-1.47747	-1.39171	-1.92024	-0.922551		2.04899e-12	7.13792e-09	0.00793759	0.00195796	2.16356e-05	0.045784
Solyc02g077300	LePrx88	Class III peroxidase	0.478	1.8445	0.169	0.495		3.175	1.62867	4.355	4.94833		1.8241	-1.46106	-0.00758207	-1.0908	0.26298	0.370256		0.000386398	0.0115151	0.995771	0.00486513	0.546548	0.38259
Solyc01g009400	LePrx90	Class III peroxidase						0.022	0.006	14.8953	7.45733		-3.0553	-1.55981	4.03703	-1.92872	9.2091	8.13482		0.151149	0.483592	0.00157586	0.157536	1.10359e-41	1.19772e-32
Solyc01g067850	LePrx91	Class III peroxidase						0.022	0.114333	2.673	5.591		2.67746	5.3853	4.53561	2.2525	6.73899	7.72435		0.254319	0.00937303	0.0353927	0.0691862	5.13512e-09	1.6983e-11
Solyc01g067870	LePrx92	Class III peroxidase	0.0835	0.113	0.1655	0.955		0.245	0.150333	35.106	13.5537		0.321479	1.04347	3.5048	-0.824518	6.97406	5.52346		0.789491	0.322607	0.000173671	0.267934	7.74251e-28	8.64211e-18
Solyc05g006230	LePrx93	Class III peroxidase
Solyc12g017870	LePrx94	Class III peroxidase						0.16	0.230667	30.3007	18.4613		0.265299	2.58918	3.01731	0.40258	7.37239	6.57943		0.808355	0.0013207	0.000163534	0.459159	4.2497e-62	1.39657e-49
Solyc02g083480	LePrx95	Class III peroxidase	0.311	5.369	0.644	1.256		40.3727	3.07567	28.473	43.8237		3.98301	1.08734	1.96678	-3.8396	-0.695429	-0.150199		3.61274e-20	0.0241451	1.81033e-05	2.34341e-38	0.0285896	0.67468
Solyc05g013350	LePrx96	Class III peroxidase
Solyc01g009410	LePrx97	Class III peroxidase						0.0376667	0.0246667	7.936	4.831		2.66519	1.7491	3.94672	-0.703187	7.52812	6.74019		0.22533	0.474663	0.0547522	0.558521	1.59366e-16	2.06722e-13
Solyc12g089360	LePrx98	Class III peroxidase						0.0756667	0	0.670333	0.947		4.74822	-2.07228	-1.9184	-5.55947	2.95724	3.38159		0.0170643	0.458685	0.505616	0.000819112	0.00850813	0.00240903
Solyc10g047110	LePrx99	Class III peroxidase	1.933	0.912	0.307	0.8745		0.808333	0.16	0.184333	0.377		-1.22005	-2.62517	-1.19692	-2.46815	-2.33212	-1.37068		0.0448045	1.04993e-05	0.0531635	9.6818e-07	3.22187e-06	0.00555406
Solyc06g005260	SlGRXC2	Glutaredoxin	242.852	162.775	467.402	414.486		83.9583	256.289	154.619	139.252		-0.706366	0.978421	0.737376	1.48006	0.686436	0.455972		0.00618988	0.000103435	0.00453287	7.38226e-14	0.000879241	0.0321072
Solyc02g084660	SlGRXC4	Glutaredoxin	45.619	33.1485	31.2225	32.5105		27.1893	44.122	36.2767	42.041
Solyc06g083690	SlGRXC5	Glutaredoxin	25.1545	32.407	59.1735	41.934		18.7903	31.878	37.793	24.0873		0.236257	1.26852	0.693964	0.632603	0.81366	0.0824059		0.313561	7.40094e-10	0.00129294	0.000194172	1.53529e-06	0.680484
Solyc08g080940	LeGPx01	Glutathione peroxidase	119.001	192.047	198.228	180.531		168.086	460.573	251.515	311.862		0.557985	0.769961	0.556446	1.32419	0.386959	0.61711		0.000106359	4.88846e-08	0.000123281	1.04475e-32	0.000968822	7.15561e-08
Solyc06g073460	LeGPx02	Glutathione peroxidase	107.219	160.098	154.338	160.146		62.2983	100.06	121.916	120.576
Solyc12g056240	LeGPx05	Glutathione peroxidase	13.7485	40.747	12.7815	12.5725		49.775	33.2853	26.902	21.0227		1.44476	-0.0633318	-0.169181	-0.710313	-1.08204	-1.51785		1.04e-09	0.835807	0.557286	0.000227773	1.44603e-08	8.59107e-16
Solyc12g056230	LeGPx06	Glutathione peroxidase	71.4045	92.7245	111.525	103.171		41.505	93.6527	145.301	98.5657		0.246474	0.677521	0.488509	1.04391	1.61314	0.972676		0.136378	9.81502e-06	0.0019892	5.02096e-18	1.72013e-41	1.18376e-15
Solyc08g006720	LeGPx08	Glutathione peroxidase	34.6795	68.4625	57.1975	49.6305		68.4917	32.8897	38.6397	42.633		0.854881	0.760709	0.475048	-1.18812	-1.02131	-0.960661		4.95017e-07	8.50148e-06	0.00774964	7.01997e-19	3.77098e-14	1.23738e-12
Solyc09g064850	LeGPx08-2	Glutathione peroxidase	21.6535	25.281	15.8925	16.6835		19.6577	13.9337	16.3687	15.9713
Solyc08g068800	LeGPx09	Glutathione peroxidase	6.5125	7.3705	1.963	4.0505		5.15233	0.882	1.16667	1.81267		0.0534633	-1.68887	-0.733641	-2.67472	-2.33871	-1.7831		0.920037	3.47012e-05	0.0932062	2.73835e-16	7.48946e-13	4.69043e-08
Solyc10g082030	Le2CysPrx01	Peroxiredoxin	224.595	436.868	418.262	329.261		225.937	179.575	220.993	171.485
Solyc07g020860	LePrxII02	Peroxiredoxin	407.834	376.947	495.429	619.415		252.529	360.716	533.338	532.181
Solyc01g079820	LePrxII04	Peroxiredoxin	78.0165	105.446	70.46	70.8185		68.2967	62.6353	65.3847	69.9883
Solyc10g083650	LePrxII05	Peroxiredoxin	41.5705	108.95	109.995	95.782		69.0953	112.974	95.35	76.5053		1.25887	1.43811	1.15578	0.579298	0.269347	-0.128799		1.93408e-16	2.87864e-21	6.13001e-14	3.82064e-06	0.0425038	0.36311
Solyc07g042440	LePrxQ01	Peroxiredoxin	33.428	90.7335	115.18	78.106		79.678	31.7563	55.675	34.152		1.31448	1.82193	1.17266	-1.45737	-0.711923	-1.49872		1.13508e-05	5.6089e-10	0.000111325	8.16342e-10	0.00409312	3.47786e-10
Solyc05g025690	SlRboh	Respiratory burst
Solyc01g099620	SlRbohA	Respiratory burst	0.2285	5.3105	2.4735	0.9775		4.20967	6.301	159.848	152.725		4.3967	3.46049	2.05261	0.448086	5.05022	4.89802		8.77235e-05	0.00235398	0.0891187	0.647777	4.56724e-09	1.42411e-08
Solyc03g117980	SlRbohB	Respiratory burst	149.911	207.542	208.495	190.561		661.677	193.284	172.612	226.951		0.337658	0.509103	0.293355	-1.90672	-2.13365	-1.82101		0.000557088	9.31222e-08	0.00325688	1.42421e-146	1.76019e-183	7.11112e-134
Solyc05g025680	SlRbohC	Respiratory burst	0.085	1.9585	1.434	0.6415		0.468	2.54967	0.896333	1.81233
Solyc06g068680	SlRbohD	Respiratory burst	158.605	45.0265	42.6785	34.0625		104.819	23.7253	53.2713	69.5587		-1.94845	-1.86261	-2.2812	-2.27483	-1.17146	-0.869597		4.69428e-25	4.50851e-23	7.1634e-34	1.77948e-50	3.58838e-14	2.79657e-08
Solyc06g075570	SlRbohE	Respiratory burst						0.232	0.0623333	4.72733	2.68433		0.389381	3.66243	2.87154	-2.00968	4.15454	3.26129		0.831504	0.004407	0.0340598	0.000445022	1.08726e-20	4.59868e-13
Solyc07g042460	SlRbohF	Respiratory burst	1.712	5.447	5.248	10.4365		4.37533	6.136	56.5157	81.9943		1.56541	1.67728	2.58891	0.357571	3.49655	3.94806		2.21377e-07	2.34773e-08	1.5063e-18	0.148149	2.48261e-55	2.12481e-70
Solyc08g081690	SlRbohG	Respiratory burst	4.1295	16.664	21.9715	16.5625		13.5077	28.9363	28.9133	39.8423		1.86146	2.42384	1.93088	0.967044	0.901967	1.2814		5.6855e-10	2.57777e-16	1.37219e-10	5.92328e-05	0.000221312	9.3775e-08
Solyc11g072800	SlRbohH	Respiratory burst	0.7195	1.022	0.166	0.125		0.792667	0.818667	4.53733	2.59667		0.398079	-2.0616	-2.56552	-0.0807721	2.32176	1.44091		0.658148	0.0113292	0.00209661	0.911294	0.000120033	0.0211244
Solyc08g079830	LeCCS01	Supereoxide dismutase	35.067	32.3985	43.0935	56.426		40.587	63.368	91.2833	65.9733
Solyc01g067740	LeCSD01	Supereoxide dismutase	107.549	154.963	99.938	85.328		220.39	213.066	88.5827	86.4123		0.397606	-0.0714835	-0.375242	-0.179224	-1.51008	-1.62604		0.0651778	0.777729	0.0884183	0.311889	4.24483e-21	2.88203e-24
Solyc03g062890	LeCSD02	Supereoxide dismutase	67.565	114.544	87.545	94.1385		55.3893	65.081	64.948	74.3203
Solyc11g066390	LeCSD03	Supereoxide dismutase	12.82	12.7735	6.3745	8.095		4.35467	7.30767	7.12633	6.425
Solyc02g021140	LeFSD01	Supereoxide dismutase	65.6975	63.4435	49.536	54.435		39.6793	34.0537	37.2807	47.0457
Solyc03g095180	LeFSD02	Supereoxide dismutase	15.2505	26.141	20.4405	18.072		13.9457	20.119	15.716	11.247
Solyc06g048410	LeFSD03	Supereoxide dismutase	580.895	589.794	660.808	542.449		423.146	543.536	498.107	360.204
Solyc06g048420	LeFSD04	Supereoxide dismutase	1.0695	0.798	0.6755	0.7835		0.536	0.528333	0.621	0.400333
Solyc06g049080	LeMSD01	Supereoxide dismutase	88.1085	134.389	111.436	123.589		121.628	120.731	126.163	114.267
Solyc07g064940	SlHCF164	Thioredoxin	15.5985	24.701	20.7785	22.6205		17.8283	18.1083	15.185	17.8513
Solyc10g008390	SlTRX-M1	Thioredoxin	7.4315	10.1875	9.6725	10.874		6.52633	12.8853	11.6353	9.86833
Solyc01g108020	SlTRX-M3	Thioredoxin	8.677	22.5645	49.0395	34.7115		17.306	17.13	19.4283	15.8533		1.26001	2.54266	1.96415	-0.144937	-0.0280522	-0.402568		2.79608e-18	4.94312e-73	1.94595e-43	0.245391	0.843959	0.000696543
Solyc07g063190	SlTRX-M4a	Thioredoxin	120.062	135.681	161.301	145.565		107.219	57.591	70.919	83.4167		0.0443822	0.456461	0.231704	-1.02758	-0.791354	-0.638412		0.828704	0.00639415	0.199421	1.18014e-15	1.18621e-09	1.20627e-06
Solyc12g013810	SlTRX-M4b	Thioredoxin	63.225	80.175	71.7285	71.684		64.8473	26.5887	42.3387	46.7157		0.21294	0.214549	0.139326	-1.41836	-0.811122	-0.750952		0.363513	0.358832	0.576394	5.11006e-18	1.39608e-06	8.79455e-06
Solyc10g006970	SlTRX-M4L	Thioredoxin	5.71	19.4275	17.6765	24.3425		18.872	7.45833	10.3217	11.5803		1.63054	1.65654	2.04683	-1.47132	-1.06732	-0.981087		1.29189e-08	6.86163e-09	6.02721e-13	1.01321e-10	4.05871e-06	2.49678e-05

## Sheet: Table S7
Table S7. Putative deregulated target genes of tomato CDF3
	fold change								padj
	apical				basal				apical				basal
Row-names	0-24	0-96	0-192		0-24	0-96	0-192		0-24	0-96	0-192		0-24	0-96	0-192	ITAG4 annotation
Solyc01g005060					-1.49923	-1.56267	-1.84692						1.05877e-10	2.01368e-11	1.67895e-15	Zinc finger protein
Solyc01g005210	-3.27943	-2.19862	-1.26257						7.24873e-64	2.4902e-29	3.06901e-10					Trehalose-6-phosphate synthase
Solyc01g005410	1.26668								5.50633e-07							Caleosin
Solyc01g005450	1.67151				-1.84332	-1.56218	-1.07038		0.00018085				2.14593e-07	1.39742e-05	0.00351174	F-box protein SKIP28
Solyc01g005460		-1.42101	-1.02951		-2.09157		-1.41586			1.76907e-06	0.000750392		3.99096e-19		2.28397e-09	Dynein light chain
Solyc01g005470	-1.98251	-3.31894	-2.90896			-2.04848			0.00261513	2.00169e-07	6.98095e-06			9.80451e-05		protein PLANT CADMIUM RESISTANCE 2-like
Solyc01g005530			-1.07733								1.86812e-09					nuclear polyadenylated RNA-binding protein
Solyc01g005970			-1.02743								8.86812e-13					F-box/kelch-repeat protein
Solyc01g006300	3.05373					-1.46774	-1.47846		4.64442e-08					0.00162468	0.00153185	LECEVI1A
Solyc01g006360		1.50572								0.00802373						Callose synthase 9
Solyc01g006370	-1.62619								9.14652e-12							Callose synthase
Solyc01g006460	3.72904	4.09617	5.45899						0.00631204	0.00245467	4.1361e-05					Non-structural maintenance of chromosomes element 4-like protein B
Solyc01g006640	-3.44439	-7.72295	-6.61112		5.36412	3.29731			0.00622626	5.99628e-05	5.1514e-05		3.92388e-08	0.00113063		AMP-dependent synthetase/ligase
Solyc01g006680	-2.29195				3.12269	3.6556	3.6399		1.63238e-12				1.40748e-31	6.22338e-43	1.42401e-42	2-oxoglutarate (2OG) and Fe(II)-dependent oxygenase superfamily protein
Solyc01g006850					1.55751	1.22225							3.26657e-06	0.000360806		Pentatricopeptide repeat
Solyc01g007020		-2.50653	-4.17026		-3.32097	-4.87505	-5.91855			0.00419435	2.27285e-06		7.76138e-07	2.93308e-13	5.76341e-19	RING-type E3 ubiquitin transferase
Solyc01g007930					-1.35739	-1.14995							9.22918e-29	3.29649e-21		F-box protein
Solyc01g007970	4.52228	5.51714	5.56028				2.57153		7.95535e-06	3.04675e-08	2.84432e-08				3.78558e-07	Cysteine-rich receptor-like protein kinase 2
Solyc01g008290	1.11143				1.49701				1.06932e-18				9.81362e-51			Dihydroorotate dehydrogenase (quinone), mitochondrial
Solyc01g008410	2.98781	4.22802	4.34198				1.65394		5.23023e-05	4.75179e-09	2.12771e-09				0.00444644	Hcr9-OR2C
Solyc01g008560					-1.52719	-1.80666	-1.5086						8.93193e-64	9.68923e-89	1.4107e-62	NAD kinase
Solyc01g008650			3.87814		1.55036	3.10921	5.0057				8.74819e-08		0.0010271	1.27337e-11	1.40076e-28	Cytochrome
Solyc01g008850						-1.5343	-1.536							3.36149e-23	3.22536e-23	Non-specific serine/threonine protein kinase
Solyc01g008940					1.85935								0.000732584			Unknown protein
Solyc01g009170	-1.45431								8.01991e-28							EIL-EIN3/EIL
Solyc01g009180					1.14269								1.9222e-24			5-methyltetrahydropteroyltriglutamate--homocysteine methyltransferase
Solyc01g009410						7.52812	6.74019							1.59366e-16	2.06722e-13	Peroxidase
Solyc01g009860	1.39418	1.09156							0.000512565	0.00741243						NAC domain-containing protein
Solyc01g010060						-2.3211								9.2116e-06		Unknown protein
Solyc01g010130	-1.48027								1.47595e-10							bHLH transcription factor 001
Solyc01g010230					-1.00605		1.58022						0.000103298		4.77513e-10	MDIS1-interacting receptor like kinase 2
Solyc01g010250		2.23535	2.88994							9.58766e-12	7.07445e-19					6-phosphogluconolactonase
Solyc01g010880					-2.3966	-2.15697	-1.85358						1.98642e-52	4.65272e-43	2.53329e-32	RING/FYVE/PHD zinc finger superfamily protein
Solyc01g011090	-1.76322								0.000198943							Phospholipid-transporting ATPase
Solyc01g014180	-1.44533	-1.4689	-1.24279						1.34949e-22	2.10734e-23	6.74892e-17					Zinc finger A20 and AN1 domain-containing stress-associated protein 8
Solyc01g017560						-2.87256	-2.88105							5.13543e-08	2.9169e-08	Unknown protein
Solyc01g020520	1.04411								2.38128e-05							Membrane-bound transcription factor site-2 protease
Solyc01g044340					1.23902	1.11862	1.81495						0.000200827	0.000965601	3.53577e-08	RBR-type E3 ubiquitin transferase
Solyc01g049770		-1.09958								0.000127025						Unknown protein
Solyc01g056850	-3.68336	-4.8565			-2.33817	-1.10786	-1.41294		2.83573e-14	9.93209e-24			2.54289e-09	0.00702088	0.000489733	CTP synthase
Solyc01g056990					-1.21742								0.000697457			hypothetical protein
Solyc01g057200					-1.11031								3.57304e-21			Pentatricopeptide repeat-containing protein
Solyc01g058100		-9.6007			-2.59295					9.76841e-08			0.000986147			Unknown protein
Solyc01g058520		-1.34127	-1.08278							2.67144e-08	9.42799e-06					Peroxidase
Solyc01g058670	-1.74661	-1.82143	-1.72388						1.49076e-38	5.92873e-42	1.86541e-37					Transcription factor
Solyc01g065500		2.04797	2.27337			1.49216	1.34785			7.52318e-14	1.00567e-16			3.43152e-11	2.60723e-09	C2 calcium/lipid-binding plant phosphoribosyltransferase family protein
Solyc01g065540	-1.21025								1.66954e-10							Two-component response regulator
Solyc01g066790			4.62301				7.52807				0.000955712				1.44068e-06	Unknown protein
Solyc01g066850		-4.0543	-2.91947			-1.31074	-2.07197			3.91334e-14	1.16626e-08			0.000809973	6.82858e-08	WAT1-related protein
Solyc01g067000					-1.0477	-1.22376							8.26566e-05	4.48332e-06		Calcium-dependent lipid-binding (CaLB domain) family protein
Solyc01g067440		-1.96326	-1.78039		-2.65228	-6.09276	-3.66583			1.81384e-05	0.000125255		2.88585e-13	3.03821e-50	1.08226e-23	Glutaredoxin
Solyc01g079150	2.44842					-1.07832	-2.00405		1.35077e-36					9.33556e-12	4.58413e-38	HCO3-transporter family
Solyc01g079600	-2.66692	-2.74512	-1.65082		-3.89548	-4.01708	-3.7725		9.07686e-17	9.25035e-18	4.95166e-07		3.216e-52	1.97925e-55	3.75858e-49	Alpha/beta-Hydrolases superfamily protein
Solyc01g079850		-2.3042	-1.61358							6.24419e-13	5.42485e-07					Protein trichome birefringence-like 11
Solyc01g079950					-2.20875	-1.1822							2.86189e-13	0.00015567		Eukaryotic aspartyl protease family protein
Solyc01g079960	4.8284	6.38164	5.85578			1.50024			1.53732e-26	5.15088e-46	1.15474e-38			1.69327e-05		Eukaryotic aspartyl protease family protein
Solyc01g080380	-2.31398	-5.45297	-3.7187		2.01828	2.58986	2.05947		0.000357435	1.32523e-12	3.76241e-08		9.4093e-05	4.69438e-07	7.89047e-05	S-adenosylmethionine decarboxylase proenzyme
Solyc01g080680					-6.41584								7.80204e-11			Sugar facilitator protein 3
Solyc01g080770		-1.12833			1.27121	1.14365	1.1767			1.34603e-06			8.59292e-12	1.18351e-09	3.85344e-10	Leucine-rich receptor-like protein kinase family protein
Solyc01g080960	4.98507					1.22938	1.08648		0.00312424					0.00168485	0.00597958	AT-hook motif nuclear-localized protein
Solyc01g081060							1.25542								4.99172e-09	Solyc01g081060
Solyc01g081540							-1.18186								8.53986e-09	Myosin-17
Solyc01g081630					-2.95257		1.12688						1.23578e-13		0.000691636	UPSTREAM OF FLC-like protein (DUF966)
Solyc01g081640	3.05215	2.56584	3.47973			1.74604	1.19678		5.28127e-06	0.000166055	1.80743e-07			1.50162e-05	0.00389716	DUF936 domain-containing protein
Solyc01g086650		-2.23796	-2.74037							3.00182e-18	1.23814e-26					Uroporphyrinogen-III C-methyltransferase
Solyc01g087140		-3.78858								3.62387e-62						Late embryogenesis abundant protein
Solyc01g087400							1.04074								2.84948e-17	RING/FYVE/PHD-type zinc finger family protein
Solyc01g087750		1.9852	1.51238		-2.44281	-2.44615	-2.34509			7.0351e-10	4.31425e-06		2.42285e-21	2.60269e-21	1.06554e-19	protein RETICULATA-RELATED 4, chloroplastic-like
Solyc01g087990	-2.09073					-2.56277	-1.52731		0.00322264					2.59629e-06	0.00600175	MADS-box transcription factor
Solyc01g088030		1.0374								0.002847						Structure-specific endonuclease subunit slx1
Solyc01g088050	1.22378	1.01599	1.14961						4.34129e-09	1.34158e-06	4.47544e-08					Serine/threonine-protein kinase-like protein
Solyc01g088630					1.81443								0.0084775			RING/U-box superfamily protein
Solyc01g090340	5.73736	6.16744	4.52453		2.17598	2.44133			2.26799e-103	1.79896e-119	3.6301e-64		3.07242e-27	6.2977e-34		Ethylene-responsive transcription factor 2
Solyc01g090560	2.05242	1.57708			-3.09532	-1.51312	-1.68759		8.22266e-07	0.000187829			1.64939e-21	5.01251e-06	3.21464e-07	Ethylene-responsive transcription factor
Solyc01g090610			5.35286			4.11858	4.9655				0.000148697			1.93259e-05	2.09124e-07	2-oxoglutarate (2OG) and Fe(II)-dependent oxygenase superfamily protein
Solyc01g091000	2.16396	2.91809	3.1748						4.00163e-09	7.21307e-16	1.79374e-18					PLATZ transcription factor family protein
Solyc01g091190	1.06022				1.48102				0.00013585				1.0269e-11			5-enolpyruvylshikimate-3-phosphate synthase
Solyc01g091260	-4.49324				-3.32117	-2.35311	-3.28063		3.08914e-100				6.37099e-91	2.60473e-46	5.52555e-89	myeloid leukemia factor
Solyc01g091330						1.10801								2.8918e-09		Glutathione S-transferase
Solyc01g091360					-1.01096								0.00388829			DUF1499 family protein
Solyc01g091370	3.24728	3.47348	3.3895		2.00369	2.10186	1.71426		1.40861e-68	1.65748e-78	1.45572e-74		9.17706e-41	1.02002e-44	5.55095e-30	AT-hook motif nuclear-localized protein 1
Solyc01g091540			3.71826								2.69754e-07					Growth-regulating factor 10
Solyc01g091610					1.19282								1.39547e-06			Pentatricopeptide repeat-containing protein
Solyc01g094050		1.71103								0.00270806						WD-40 repeat family protein / beige-like protein
Solyc01g094200					1.30569								1.4742e-77			Malic enzyme
Solyc01g094360			1.14075			1.1484					0.0045138			0.000415654		MYB transcription factor
Solyc01g094570					-1.15462	-1.26189							2.49251e-19	9.12045e-23		Alpha/beta-Hydrolases superfamily protein
Solyc01g094610	-1.2297					3.16313	2.58304		7.91772e-05					4.47485e-41	1.32804e-27	Rop guanine nucleotide exchange factor 2
Solyc01g094690	-2.82154	-3.24209	-2.15238		-3.65692	-1.95737	-2.03189		4.12766e-29	2.72152e-38	2.79606e-17		1.07942e-72	1.7125e-21	4.84108e-23	plasma membrane intrinsic protein 1.2
Solyc01g094910	4.56371	6.10365	6.1084		1.80742				2.68831e-10	1.00595e-17	1.28277e-17		0.00197757			ferric-chelate reductase
Solyc01g094940	-1.52477	-1.15772	-1.58825						7.15995e-13	6.91866e-08	8.01466e-14					Protein kinase superfamily protein
Solyc01g094970			5.21199			2.89582	4.44771				5.43342e-05			0.00297002	2.95445e-06	Pectin lyase-like superfamily protein
Solyc01g095240	-1.54301	-2.69645	-2.65857		-1.15833				0.00140735	5.45092e-08	1.30042e-07		0.00156951			Calcium-transporting ATPase 2, endoplasmic reticulum-type
Solyc01g095470			1.11137								2.14579e-10					Glucose-6-phosphate 1-epimerase
Solyc01g096020	-1.77079	-1.84751	-1.58327		-1.00347				9.5091e-17	3.29298e-18	1.58881e-13		1.01594e-08			E3 ubiquitin-protein ligase
Solyc01g096070	-2.02302	-2.28775	-2.16367						3.9658e-22	4.20359e-28	4.59391e-25					Auxin Response Factor 18
Solyc01g096510					-3.337	-4.40935	-2.9048						0.00038504	2.56027e-06	0.00250673	Sigma factor binding protein 1, chloroplastic
Solyc01g097190	-1.53026								5.33259e-23							Ankyrin-like protein
Solyc01g097290	-1.74522	-2.8774	-3.48927				-1.63894		1.76912e-31	2.7938e-84	8.11379e-123				1.40787e-41	auxin-regulated IAA16
Solyc01g097510		1.62698	1.65386							7.98379e-08	5.7069e-08					annexin 3
[truncated: 963 more rows]

## Sheet: Table S8
Table S8. GO enrichment analyses of deregulated targets of tomato CDF3
[truncated: 52 more rows]
